# Supplementary material for: Captivity Influences the Gut Microbiome of Rhinopithecus roxellana
Source: Frontiers journal article supplement (doi:10.3389/fmicb.2021.763022), 2021-12-07
Supplement: Table_1.XLS [file Table_1.XLS]

## Sheet: A.metadata_of_each_cohorts
Sample ID	sample_name	cohorts	Location	Host	Situation	Longitude and Latitude	Altitude
R01	SH_082	CRr	Shanghai Wild Animal Park	Rhinopithecus roxellana	captive	E:121°21'47.48" N:31°11'33.65"	4m
R02	SH_982	CRr	Shanghai Wild Animal Park	Rhinopithecus roxellana	captive	E:121°21'47.48" N:31°11'33.65"	4m
R03	SH_181	CRr	Shanghai Wild Animal Park	Rhinopithecus roxellana	captive	E:121°21'47.48" N:31°11'33.65"	4m
R04	SH_122	CRr	Shanghai Wild Animal Park	Rhinopithecus roxellana	captive	E:121°21'47.48" N:31°11'33.65"	4m
R05	SH_171	CRr	Shanghai Wild Animal Park	Rhinopithecus roxellana	captive	E:121°21'47.48" N:31°11'33.65"	4m
R06	SH_162	CRr	Shanghai Wild Animal Park	Rhinopithecus roxellana	captive	E:121°21'47.48" N:31°11'33.65"	4m
R08	SH_073	CRr	Shanghai Wild Animal Park	Rhinopithecus roxellana	captive	E:121°21'47.48" N:31°11'33.65"	4m
R09	SH_183	CRr	Shanghai Wild Animal Park	Rhinopithecus roxellana	captive	E:121°21'47.48" N:31°11'33.65"	4m
R10	SH_131	CRr	Shanghai Wild Animal Park	Rhinopithecus roxellana	captive	E:121°21'47.48" N:31°11'33.65"	4m
R14	Tail_lost_18	WRr	Sichuan province	Rhinopithecus roxellana	wild	E:104°14'4'' N:32°37'11''	1992m
R15	All_male_17	WRr	Sichuan province	Rhinopithecus roxellana	wild	E:104°14'4'' N:32°37'11''	1992m
R16	AM16	WRr	Sichuan province	Rhinopithecus roxellana	wild	E:104°14'4'' N:32°37'11''	1992m
R17	Mei18	WRr	Sichuan province	Rhinopithecus roxellana	wild	E:104°14'4'' N:32°37'11''	1992m
R18	Af_can_17	WRr	Sichuan province	Rhinopithecus roxellana	wild	E:104°14'4'' N:32°37'11''	1992m
R19	AF	WRr	Sichuan province	Rhinopithecus roxellana	wild	E:104°14'4'' N:32°37'11''	1992m
R20	AF17	WRr	Sichuan province	Rhinopithecus roxellana	wild	E:104°14'4'' N:32°37'11''	1992m
R21	Unknown_individual_16	WRr	Sichuan province	Rhinopithecus roxellana	wild	E:104°14'4'' N:32°37'11''	1992m
R22	Unknown_individual_18	WRr	Sichuan province	Rhinopithecus roxellana	wild	E:104°14'4'' N:32°37'11''	1992m
R63	BJ-W001A	CMm	Beijing Wildlife Park	Macaque mulatta	captive	-	-
R64	BJ-W002A	CMm	Beijing Wildlife Park	Macaque mulatta	captive	-	-
R65	BJ-W003A	CMm	Beijing Wildlife Park	Macaque mulatta	captive	-	-
R66	BJ-W004A	CMm	Beijing Wildlife Park	Macaque mulatta	captive	-	-
R67	BJ-W005A	CMm	Beijing Wildlife Park	Macaque mulatta	captive	-	-
R68	BJ-W006A	CMm	Beijing Wildlife Park	Macaque mulatta	captive	-	-
R69	BJ-W007A	CMm	Beijing Wildlife Park	Macaque mulatta	captive	-	-
R70	BJ-W008A	CMm	Beijing Wildlife Park	Macaque mulatta	captive	-	-
R71	BJ-W009A	CMm	Beijing Wildlife Park	Macaque mulatta	captive	-	-
R72	BJ-W010A	CMm	Beijing Wildlife Park	Macaque mulatta	captive	-	-
Sample ID	cohorts	Location	Host	Situation	SRS_ID	SRR_ID	Gender	Age	Height (cm)	Weight (kg)	BMI (kg/m2)	Diabetic (Y or N)	FBG (mmol/L)	SBP (mm Hg)	DBP (mm Hg)	FINS (mU/L)	FCP (ng/ml)	HBALC (%)	TG (mmol/L)	TCHO (mmol/L)	HDL (mmol/L)	LDL (mmol/L)
NLF006	Hum	China	Homo sapiens	-	SRS259472	SRR341619	female	27	159	45	17.8	N	5.23	115	70	15.57	-	5.6	0.68	4.76	1.13	2.9
NLF007	Hum	China	Homo sapiens	-	SRS259473	SRR341620	female	39	165	56	20.57	N	5.09	130	90	7.46	-	5.2	1.31	4.47	1.07	2.91
NLF009	Hum	China	Homo sapiens	-	SRS259474	SRR341621	female	27	159	48	18.99	N	5.05	110	70	6.29	-	5.2	1.96	5.99	1.11	4.14
NLF010	Hum	China	Homo sapiens	-	SRS259475	SRR341622	female	35	159	51	20.17	N	5.41	140	90	3.83	-	5.7	1.99	5.06	0.89	2.89
NLF014	Hum	China	Homo sapiens	-	SRS259477	SRR341624	female	37	162	49	18.67	N	5.73	130	85	4.05	-	5.3	0.98	5.44	1.3	3.66
NLM001	Hum	China	Homo sapiens	-	SRS259478	SRR341625	male	32	160	49	19.14	N	5.54	130	80	6.35	-	5.2	0.81	4.05	1.23	2.41
NLM003	Hum	China	Homo sapiens	-	SRS259479	SRR341626	male	23	168	55	19.49	N	5.7	100	60	12.26	-	5.8	0.96	4.92	1.09	2.38
NLM005	Hum	China	Homo sapiens	-	SRS259480	SRR341627	male	42	168	54	19.13	N	5.83	130	80	14.55	-	5.9	2	6.11	1.16	3.94
NLM008	Hum	China	Homo sapiens	-	SRS259481	SRR341628	male	22	178	62	19.57	N	5.25	120	80	15.08	-	5.9	1.24	6.32	1.47	4.27

## Sheet: B.data_information
Samples	cohorts	Raw data(bp)	Clean data(bp)	Clean Reads	GC(%)	Q20(%)	Q30(%)
R01	CRr	14317785702	12186463986	40667864	45.6	96.88	91.5
R02	CRr	17300231298	14517350046	48443498	44.94	96.94	91.61
R03	CRr	16861851838	14013935812	46771115	45.38	97.07	91.92
R04	CRr	13450750646	11662030616	38923372	45.86	96.62	90.96
R05	CRr	13712497372	11794781420	39362578	44.17	96.99	91.75
R06	CRr	12118117008	10471152762	34943121	44.42	97.08	91.91
R08	CRr	17187996320	14559719580	48600487	45.96	97.83	93.76
R09	CRr	13304771300	11290051384	37675240	45.89	96.58	90.93
R10	CRr	13712826534	11806319738	39399962	45.38	96.85	91.44
R14	WRr	12853440760	11001736628	36712921	46.68	96.93	91.61
R15	WRr	12857630872	10946885544	36528733	46.98	96.95	91.72
R16	WRr	14347275118	12279520452	40979112	47.5	96.6	90.97
R17	WRr	13450861010	11033078740	36820642	45.82	96.94	91.78
R18	WRr	14351430404	12216124680	40765534	47.16	96.91	91.58
R19	WRr	14432373440	12150513354	40546789	45.84	97.08	91.94
R20	WRr	12114941382	10381755368	34646235	47.15	96.92	91.64
R21	WRr	13551597756	11532109556	38485919	46.22	96.69	91.16
R22	WRr	13482764968	11457770506	38233950	45.04	96.9	91.58
R63	CMm	15145069732	12470627050	41618312	44.53	97.52	93.08
R64	CMm	13540046654	11346796184	37862539	45.46	97.54	93.11
R65	CMm	14882027022	12110444722	40410188	50.11	97.27	92.64
R66	CMm	12094458008	10096714264	33691268	47.09	97.39	92.82
R67	CMm	13658151086	11288699446	37671225	46.29	97.39	92.81
R68	CMm	11871142552	9942112468	33177744	45.29	97.37	92.76
R69	CMm	12657009392	10566697524	35259541	49.82	97.29	92.67
R70	CMm	13370660410	11060073002	36908116	46.95	97.54	93.15
R71	CMm	12695473154	10745999070	35859103	46.46	97	91.98
R72	CMm	13078662232	10647877804	35533478	45.17	97.35	92.7
