# Supplementary material for: Captivity Influences the Gut Microbiome of Rhinopithecus roxellana
Source: Frontiers journal article supplement (doi:10.3389/fmicb.2021.763022), 2021-12-07
Supplement: Table_2.XLS [file Table_2.XLS]

## Sheet: A.Taxa_of_CRr_and_WRr
Taxonomy	R01	R02	R03	R04	R05	R06	R08	R09	R10	R14	R15	R16	R17	R18	R19	R20	R21	R22	Clades	p_value	p_value_FDR
group	CRr	CRr	CRr	CRr	CRr	CRr	CRr	CRr	CRr	WRr	WRr	WRr	WRr	WRr	WRr	WRr	WRr	WRr	-	-	-
[Eubacterium] eligens [ref_mOTU_v25_02375]	0.00404327	0.000155227	0.000729576	0.000267222	0.000651731	0.00799415	0	0	0	0	0	0	0	0	0	0	0	0	Species	0.111507	0.236269
[Eubacterium] eligens [ref_mOTU_v25_02376]	0.00304729	0.000252333	0.00114964	0.000978409	0.00100899	0.00932527	0	0	0	0	0	0	0	0	0	0	0	0	Species	0.0990397	0.216672
[Eubacterium] hallii [ref_mOTU_v25_03632]	0	0	0	0	0.000114334	0	0	0	8.90475e-05	0	0	0	0	0	0	0	0	0	Species	0.153845	0.2825
[Ruminococcus] gnavus [ref_mOTU_v25_01594]	5.45172e-05	0	0	0	0	0	0	0	0	0	0	0	0.00304577	0	0	0	0	0	Species	0.340744	0.406478
Acinetobacter sp. [ref_mOTU_v25_02372]	0.000853242	0.000587787	0.000325231	0	0	0	0.000158838	0.0193792	0.00258948	0	0	0	0	0	0	0	0	0	Species	0.225999	0.317281
Acinetobacter species incertae sedis [meta_mOTU_v25_12662]	0.00120802	0.00137129	0.000459855	0	0	0	0.000565706	0.0304179	0.00478225	0	0	0	0	0	0	0	0	0	Species	0.209995	0.31075
Akkermansia muciniphila [ref_mOTU_v25_03591]	0	0	0	0	0	0	0	0	0	0	0	0	0.0118819	0.00149679	0.00315866	0	0	0	Species	0.17891	0.288349
Alistipes finegoldii [ref_mOTU_v25_03682]	0.000151416	0.000148538	0.000128087	0	0	7.41622e-05	7.1359e-05	0	0	0	0	0	0	0	0	0	0	0	Species	0.0110506	0.0603303
Alistipes finegoldii/onderdonkii [ref_mOTU_v25_03069]	5.0472e-05	0	0	0	0	0	0	0	0	0.000375736	0	0	0	0	0	0	0	0	Species	0.403581	0.462325
Alistipes indistinctus [ref_mOTU_v25_11860]	0	0.000789136	0.00104054	0	0	0	0	0.000322675	0	0	0	0	0	0.0168452	0	0.0214942	0	0	Species	0.17707	0.288349
Alistipes obesi [ref_mOTU_v25_06695]	0.00011982	0	0	0	0.000915582	0.000177019	0	0.000221407	0	0	0	0	0.00218306	0	0.00232745	0	0	0	Species	0.33805	0.40566
Alistipes putredinis [ref_mOTU_v25_03683]	0.00019916	0.000125598	0.000122094	0.00010233	0	0	0	0	0	0	0	0	0	0	0	0	0	0	Species	0.0300588	0.101763
Alistipes senegalensis [ref_mOTU_v25_01017]	0.000419748	0.00485446	0.00616905	0.00354874	0.00264139	0.00460266	0.00610498	0.00135414	0.0021651	0	0	0	0.0124712	0.0069986	0.0109085	0.016088	0	0.00125945	Species	0.444721	0.499076
Alistipes shahii [ref_mOTU_v25_01014]	4.11867e-05	0.000163057	0.000480019	0.000127428	0.000312747	0.00101175	0.000284462	0.000281679	8.18027e-05	0	0.00647178	0.000722295	0.00162842	0.00275786	0.000524598	0.000959131	0.000412804	0	Species	0.105626	0.226984
Alistipes sp. An31A [meta_mOTU_v25_12393]	0.000803983	0.000124195	0.000779062	0	0	0	0	0	0	0	0	0	0.0066006	0	0.00184554	0	0	0	Species	0.330009	0.400643
Alistipes species incertae sedis [meta_mOTU_v25_12985]	0.000339135	0.000188	0	0	0	0	0	0.000273068	0	0	0	0	0.00403958	0	0.000883911	0	0	0	Species	0.323457	0.396791
Alistipes species incertae sedis [meta_mOTU_v25_13041]	0.000371945	0.00037302	0	0.000255451	0.000602591	0	0	0.000229971	0	0	0	0	0.00487665	0	0.00468927	0	0	0	Species	0.241881	0.324292
Alistipes timonensis [ref_mOTU_v25_01015]	0.000553145	0.000739847	0.000610471	0.000276733	0.00040184	0	0.0008688	0.000768706	0.000495467	0.00197685	0	0	0.00284767	0	0.000683575	0	0	0	Species	0.813303	0.833946
Anaerostipes hadrus [ref_mOTU_v25_00856]	0	0	0.000130171	0	0	0.000227154	0	0	0.000498184	0	0	0	0	0.0019865	0	0.00207259	0	0	Species	0.258528	0.339108
Anaerotruncus rubiinfantis [ref_mOTU_v25_09169]	0	0	0	0	0	0	0	0.000172355	0.000282231	0	0	0	0	0	0	0	0	0	Species	0.164166	0.287134
Arabia massiliensis [ref_mOTU_v25_10234]	0	0	0.000835566	0.000441532	0	0.000322527	0	0	0	0.00108937	0.00579893	0	0	0	0	0	0	0	Species	0.378117	0.436455
Archaea;Euryarchaeota	0.00188261	0.0264667	0.00420579	0.00148682	0.00145965	0.000385174	0.0134914	0.000192703	0.00788344	0.0120158	0.0396554	0.143802	0	0.0132102	0.000975196	0.0185146	0.0085088	0.335643	Phylum	0.14403	0.28065
Archaea;Euryarchaeota;Methanobacteria	0	0.0244829	0.00398404	0	0	0	0.013204	0	0.00788344	0	0	0.13245	0	0.00397107	0.000975196	0.00487418	0	0.328243	Class	0.230369	0.317281
Archaea;Euryarchaeota;Methanobacteria;Methanobacteriales	0	0.0244829	0.00398404	0	0	0	0.013204	0	0.00788344	0	0	0.13245	0	0.00397107	0.000975196	0.00487418	0	0.328243	Order	0.230369	0.317281
Archaea;Euryarchaeota;Methanobacteria;Methanobacteriales;Methanobacteriaceae	0	0.0244829	0.00398404	0	0	0	0.013204	0	0.00788344	0	0	0.13245	0	0.00397107	0.000975196	0.00487418	0	0.328243	Family	0.230369	0.317281
Archaea;Euryarchaeota;Methanobacteria;Methanobacteriales;Methanobacteriaceae;Methanobrevibacter	0	0.0244829	0.00398404	0	0	0	0.013204	0	0.00788344	0	0	0.13245	0	0.00397107	0.000975196	0.00487418	0	0.328243	Genus	0.230369	0.317281
Archaea;Euryarchaeota;Methanomicrobia	0.00188261	0.00198376	0.000221748	0.00148682	0.00145965	0.000385174	0.000287405	0.000192703	0	0.0120158	0.0396554	0.0113522	0	0.0092391	0	0.0136404	0.0085088	0.00740041	Class	0.0166937	0.0784217
Archaea;Euryarchaeota;Methanomicrobia;Methanomicrobiales	0.00188261	0.00198376	0.000221748	0.00148682	0.00145965	0.000385174	0.000287405	0.000192703	0	0.0120158	0.0396554	0.0113522	0	0.0092391	0	0.0136404	0.0085088	0.00740041	Order	0.0166937	0.0784217
Atopobiaceae species incertae sedis [meta_mOTU_v25_14133]	0.000516107	0.000254885	0	0	0	0.000219487	0.000247377	0	0.000462053	0	0	0	0	0	0	0	0	0	Species	0.0134695	0.0685925
Atopobiaceae species incertae sedis [meta_mOTU_v25_14264]	0.00156706	0.000572217	0.000387198	0	0.00155921	0	0.000351183	0	0.00175662	0	0	0	0	0	0	0	0	0	Species	0.0125187	0.0659679
Azospirillum sp. CAG:239 [ref_mOTU_v25_07592]	0.000238348	0.00038459	0.00114648	0	0	0	0	0.0016327	0	0	0	0	0	0	0	0	0	0	Species	0.0778788	0.189536
Azospirillum species incertae sedis [meta_mOTU_v25_12508]	0.00351305	0.00355674	0	0.00234376	0.000444929	0.00346825	0.00241475	0.00021421	0.00191738	0	0	0	0	0	0	0	0	0	Species	0.000811084	0.00847442
Azospirillum species incertae sedis [meta_mOTU_v25_13574]	0.000365339	0.00151537	0.00770032	0	0	0	0.00245139	0.000646582	0.00123707	0	0	0	0	0	0	0	0	0	Species	0.0769447	0.188779
Bacteria sp. [ref_mOTU_v25_03594]	0.0051442	0.000155336	0.000253573	0.000664473	0.000640895	0	0.00091561	0	0	0.000770832	0	0	0.0521054	0.00151563	0.00382059	0.00054095	0.00985038	0.00106506	Species	0.242615	0.324558
Bacteria species incertae sedis [meta_mOTU_v25_13893]	0	0.000252619	0.00552177	0	0.000504496	0	0.00055319	0	0	0	0	0	0	0	0	0	0	0	Species	0.223984	0.317281
Bacteria;Actinobacteria	0.00440229	0.00440348	0.00254805	0.00133636	0.00321221	0.000884474	0.00159746	0.0012547	0.00359526	0.0567616	0.00947031	0.0465849	0.0110202	0.0147409	0.00268068	0.0105125	0.13078	0.0770654	Phylum	0.0184828	0.0822087
Bacteria;Actinobacteria;Actinobacteria	0	0.00051597	0.000416449	0.000204764	0	0.00034246	6.7288e-05	0	0.00033904	0.0529752	0.00250719	0.0456053	0.00832863	0.0116071	0.00177187	0.0105125	0.128921	0.0748391	Class	0.0194634	0.0825711
Bacteria;Actinobacteria;Actinobacteria;Bifidobacteriales	0	6.00276e-05	0	0	0	0	6.7288e-05	0	0.00033904	0.0495546	0.00250719	0.0450149	0.00832863	0.0107096	0.00177187	0.0105125	0.126197	0.0748391	Order	0.0194264	0.0825711
Bacteria;Actinobacteria;Actinobacteria;Bifidobacteriales;Bifidobacteriaceae	0	6.00276e-05	0	0	0	0	6.7288e-05	0	0.00033904	0.0495546	0.00250719	0.0450149	0.00832863	0.0107096	0.00177187	0.0105125	0.126197	0.0748391	Family	0.0194264	0.0825711
Bacteria;Actinobacteria;Actinobacteria;Bifidobacteriales;Bifidobacteriaceae;Bifidobacterium	0	6.00276e-05	0	0	0	0	6.7288e-05	0	0.00033904	0.0495546	0.00250719	0.0450149	0.00832863	0.0107096	0.00177187	0.0105125	0.126197	0.0748391	Genus	0.0194264	0.0825711
Bacteria;Actinobacteria;Actinobacteria;Propionibacteriales	0	0.000455943	0	0	0	0	0	0	0	0	0	0.000590391	0	0.000897444	0	0	0	0	Order	0.365861	0.428242
Bacteria;Actinobacteria;Actinobacteria;Propionibacteriales;Propionibacteriaceae	0	0.000455943	0	0	0	0	0	0	0	0	0	0.000590391	0	0.000897444	0	0	0	0	Family	0.365861	0.428242
Bacteria;Actinobacteria;Actinobacteria;Propionibacteriales;Propionibacteriaceae;Cutibacterium	0	0.000455943	0	0	0	0	0	0	0	0	0	0.000590391	0	0.000897444	0	0	0	0	Genus	0.365861	0.428242
Bacteria;Actinobacteria;Actinobacteria;Pseudonocardiales	0	0	0.000416449	0.000204764	0	0.00034246	0	0	0	0.0034206	0	0	0	0	0	0	0.00272396	0	Order	0.227594	0.317281
Bacteria;Actinobacteria;Actinobacteria;Pseudonocardiales;Pseudonocardiaceae	0	0	0.000416449	0.000204764	0	0.00034246	0	0	0	0.0034206	0	0	0	0	0	0	0.00272396	0	Family	0.227594	0.317281
Bacteria;Actinobacteria;Actinobacteria;Pseudonocardiales;Pseudonocardiaceae;Saccharopolyspora	0	0	0.000416449	0.000204764	0	0.00034246	0	0	0	0.0034206	0	0	0	0	0	0	0.00272396	0	Genus	0.227594	0.317281
Bacteria;Actinobacteria;Coriobacteriia	0.00440229	0.00388751	0.0021316	0.0011316	0.00321221	0.000542013	0.00153017	0.0012547	0.00325622	0.00378643	0.00696313	0.000979592	0.00269154	0.00313384	0.00090881	0	0.00185974	0.00222635	Class	0.872735	0.881462
Bacteria;Actinobacteria;Coriobacteriia;Coriobacteriales	0.00440229	0.00388751	0.00123328	0.000584875	0.00299751	0.000219487	0.00146025	0.0012547	0.00309536	0	0	0	0	0.00313384	0	0	0	0	Order	0.0100498	0.055365
Bacteria;Actinobacteria;Coriobacteriia;Coriobacteriales;Atopobiaceae	0.00429677	0.00388751	0.00105301	0.000266183	0.00299751	0.000219487	0.00146025	0.0012547	0.00309536	0	0	0	0	0.00313384	0	0	0	0	Family	0.0139273	0.0691799
Bacteria;Actinobacteria;Coriobacteriia;Coriobacteriales;Atopobiaceae;Olsenella	0.0022136	0.0030604	0.000665814	0.000266183	0.0014383	0	0.000861692	0.0012547	0.000876687	0	0	0	0	0.00313384	0	0	0	0	Genus	0.0968875	0.213265
Bacteria;Actinobacteria;Coriobacteriia;Coriobacteriales;Coriobacteriaceae	0.00010552	0	0.000180269	0.000318692	0	0	0	0	0	0	0	0	0	0	0	0	0	0	Family	0.0971304	0.213265
Bacteria;Actinobacteria;Coriobacteriia;Coriobacteriales;Coriobacteriaceae;Collinsella	0.00010552	0	0.000180269	0.000318692	0	0	0	0	0	0	0	0	0	0	0	0	0	0	Genus	0.0971304	0.213265
Bacteria;Actinobacteria;Coriobacteriia;Eggerthellales	0	0	0.00089832	0.000546724	0.000214704	0.000322527	6.99223e-05	0	0.00016086	0.00378643	0.00696313	0.000979592	0.00269154	0	0.00090881	0	0.00185974	0.00222635	Order	0.0196209	0.0825711
Bacteria;Actinobacteria;Coriobacteriia;Eggerthellales;Eggerthellaceae	0	0	0.00089832	0.000546724	0.000214704	0.000322527	6.99223e-05	0	0.00016086	0.00378643	0.00696313	0.000979592	0.00269154	0	0.00090881	0	0.00185974	0.00222635	Family	0.0196209	0.0825711
Bacteria;Actinobacteria;Coriobacteriia;Eggerthellales;Eggerthellaceae;Arabia	0	0	0.000835566	0.000441532	0	0.000322527	0	0	0	0.00108937	0.00579893	0	0	0	0	0	0	0	Genus	0.378117	0.436455
Bacteria;Actinobacteria;Coriobacteriia;Eggerthellales;Eggerthellaceae;Eggerthella	0	0	6.27542e-05	0.000105192	0.000214704	0	6.99223e-05	0	0.00016086	0	0.00116419	0	0	0	0	0	0	0.000635247	Genus	0.366762	0.428242
Bacteria;Bacteroidetes	0.376966	0.324443	0.378087	0.270306	0.309611	0.266147	0.468305	0.534393	0.449049	0.00685174	0.00973682	0.00548744	0.130946	0.049179	0.189446	0.110954	0.00103194	0.017525	Phylum	3.89344e-07	2.94928e-05
Bacteria;Bacteroidetes;Bacteroidia	0.376966	0.324443	0.378087	0.270306	0.309611	0.266147	0.468305	0.534393	0.449049	0.00685174	0.00973682	0.00548744	0.130946	0.049179	0.189446	0.110954	0.00103194	0.017525	Class	3.89344e-07	2.94928e-05
Bacteria;Bacteroidetes;Bacteroidia;Bacteroidales	0.376966	0.324443	0.378087	0.270306	0.309611	0.266147	0.468305	0.534393	0.449049	0.00685174	0.00973682	0.00548744	0.130946	0.049179	0.189446	0.110954	0.00103194	0.017525	Order	3.89344e-07	2.94928e-05
Bacteria;Bacteroidetes;Bacteroidia;Bacteroidales;Bacteroidaceae	0.0228598	0.0456905	0.0330436	0.0338406	0.0244831	0.0371909	0.0680815	0.0213203	0.0688047	0.000348302	0.00156438	0.00476514	0.0253224	0.020703	0.0634649	0.0664942	0.000619139	0.0162655	Family	0.120344	0.249754
Bacteria;Bacteroidetes;Bacteroidia;Bacteroidales;Bacteroidaceae;Bacteroides	0.0228598	0.0456905	0.0330436	0.0338406	0.0244831	0.0371909	0.0680815	0.0213203	0.0688047	0.000348302	0.00156438	0.00476514	0.0253224	0.020703	0.0634649	0.0664942	0.000619139	0.0162655	Genus	0.120344	0.249754
Bacteria;Bacteroidetes;Bacteroidia;Bacteroidales;Muribaculaceae	0.0205544	0.0367176	0.035752	0.00307661	0.0123566	0.0237335	0.0133763	0.00537072	0.0114768	0	0	0	0	0.00187443	0	0	0	0	Family	0.000451798	0.00547483
Bacteria;Bacteroidetes;Bacteroidia;Bacteroidales;Muribaculaceae;Muribaculum	0.0025649	0.000987002	0.000992961	0.000935554	0.00149511	0.00215595	0.000264837	0.00237298	0.000582223	0	0	0	0	0	0	0	0	0	Genus	0.000126339	0.00229162
Bacteria;Bacteroidetes;Bacteroidia;Bacteroidales;Odoribacteraceae	0.000398938	0.00106365	0.000657816	0.000212764	0.000754307	0.00145608	0.00128888	0.000331732	0.00176333	0	0	0	0.0011679	0	0.00350365	0	0	0	Family	0.416935	0.47493
Bacteria;Bacteroidetes;Bacteroidia;Bacteroidales;Odoribacteraceae;Butyricimonas	0	0	0	0	0.000291239	0.000596238	0	0	0	0	0	0	0.0011679	0	0.00350365	0	0	0	Genus	0.309779	0.384685
Bacteria;Bacteroidetes;Bacteroidia;Bacteroidales;Odoribacteraceae;Odoribacter	0.000398938	0.00106365	0.000657816	0.000212764	0.000463068	0.000859845	0.00128888	0.000331732	0.00176333	0	0	0	0	0	0	0	0	0	Genus	0.000305264	0.00403351
Bacteria;Bacteroidetes;Bacteroidia;Bacteroidales;Porphyromonadaceae	0	0.00113696	0.000728601	0	0	0	0.00158274	0	0.00113171	0	0	0	0	0	0	0	0	0	Family	0.0298097	0.101543
Bacteria;Bacteroidetes;Bacteroidia;Bacteroidales;Prevotellaceae	0.165833	0.156433	0.0707885	0.191523	0.246226	0.0723206	0.271442	0.327003	0.303686	0.00415085	0.00170066	0	0.0048154	0	0.00310591	0.00237289	0	0	Family	9.41735e-06	0.000438993
Bacteria;Bacteroidetes;Bacteroidia;Bacteroidales;Prevotellaceae;Prevotella	0.165833	0.156433	0.0707885	0.191523	0.246226	0.0723206	0.271442	0.327003	0.303686	0.00415085	0.00170066	0	0.0048154	0	0.00310591	0.00237289	0	0	Genus	9.41735e-06	0.000438993
Bacteria;Bacteroidetes;Bacteroidia;Bacteroidales;Rikenellaceae	0.00312432	0.00750585	0.00932932	0.00431068	0.00497607	0.0058656	0.00739861	0.00353358	0.00274237	0.00235258	0.00647178	0.000722295	0.0397331	0.0266016	0.0231451	0.0385414	0.000412804	0.00125945	Family	0.0907093	0.208219
Bacteria;Bacteroidetes;Bacteroidia;Bacteroidales;Rikenellaceae;Alistipes	0.00305001	0.00750585	0.00932932	0.00431068	0.00487415	0.0058656	0.0073296	0.00345164	0.00274237	0.00235258	0.00647178	0.000722295	0.0346472	0.0266016	0.0218629	0.0385414	0.000412804	0.00125945	Genus	0.0942337	0.212289
Bacteria;Bacteroidetes;Bacteroidia;Bacteroidales;Tannerellaceae	0.000269594	0.000303074	0.00540633	0.000407752	0.000293856	0	0.00100929	0.00566201	0.00108218	0	0	0	0.00353828	0	0.00463352	0.00354563	0	0	Family	0.766732	0.7929
Bacteria;Bacteroidetes;Bacteroidia;Bacteroidales;Tannerellaceae;Parabacteroides	0.000269594	0.000303074	0.00540633	0.000407752	0.000293856	0	0.00100929	0.00566201	0.00108218	0	0	0	0.00353828	0	0.00463352	0.00354563	0	0	Genus	0.766732	0.7929
Bacteria;Candidatus	0.0322524	0.000730554	0.00670544	0.0320744	0.0307407	0.00149973	0.0031996	0.0114704	0.00707258	0	0	0	0	0	0	0	0	0	Phylum	0.00741106	0.0431837
Bacteria;Candidatus;NA;Candidatus	0.0322524	0.000730554	0.00670544	0.0320744	0.0307407	0.00149973	0.0031996	0.0114704	0.00707258	0	0	0	0	0	0	0	0	0	Order	0.00741106	0.0431837
Bacteria;Chloroflexi	0	0	0.0120479	0.00136925	0.000425398	0.00124848	0	0	0.000343255	0.0131972	0	0	0.018084	0	0.0117319	0.00147181	0	0.000892945	Phylum	0.240123	0.322774
Bacteria;Chloroflexi;Dehalococcoidia	0	0	0.0120479	0.00136925	0.000425398	0.00124848	0	0	0.000343255	0.0131972	0	0	0.018084	0	0.0117319	0.00147181	0	0.000892945	Class	0.240123	0.322774
Bacteria;Chloroflexi;Dehalococcoidia;Dehalococcoidales	0	0	0.0120479	0.00136925	0.000425398	0.00124848	0	0	0.000343255	0.0131972	0	0	0.018084	0	0.0117319	0.00147181	0	0.000892945	Order	0.240123	0.322774
Bacteria;Elusimicrobia	0	0	0.000417651	0	0	0	0	0.000253882	0	0	0	0	0	0	0	0	0	0	Phylum	0.164415	0.287134
Bacteria;Elusimicrobia;Elusimicrobia	0	0	0.000417651	0	0	0	0	0.000253882	0	0	0	0	0	0	0	0	0	0	Class	0.164415	0.287134
Bacteria;Elusimicrobia;Elusimicrobia;Elusimicrobiales	0	0	0.000417651	0	0	0	0	0.000253882	0	0	0	0	0	0	0	0	0	0	Order	0.164415	0.287134
Bacteria;Elusimicrobia;Elusimicrobia;Elusimicrobiales;Elusimicrobiaceae	0	0	0.000417651	0	0	0	0	0.000253882	0	0	0	0	0	0	0	0	0	0	Family	0.164415	0.287134
Bacteria;Elusimicrobia;Elusimicrobia;Elusimicrobiales;Elusimicrobiaceae;Elusimicrobium	0	0	0.000417651	0	0	0	0	0.000253882	0	0	0	0	0	0	0	0	0	0	Genus	0.164415	0.287134
Bacteria;Firmicutes	0.0860672	0.413862	0.218539	0.333869	0.347335	0.316114	0.242758	0.169442	0.247418	0.826234	0.857599	0.739068	0.618109	0.63479	0.682779	0.670576	0.761163	0.518796	Phylum	1.23978e-07	2.31953e-05
Bacteria;Firmicutes;Bacilli	0.00094378	0.00413541	0.00146148	0.000538921	0.0109769	0.000853747	0.000710641	0.000364891	0.00183043	0.0104873	0.00144057	0.0048219	0.0107034	0.00284741	0.00384271	0.0025522	0.0298945	0.0182965	Class	0.0516845	0.152043
Bacteria;Firmicutes;Bacilli;Lactobacillales	0.00094378	0.00413541	0.00146148	0.000538921	0.0109769	0.000853747	0.000710641	0.000364891	0.00183043	0.0104873	0.00144057	0.0048219	0.0107034	0.00284741	0.00384271	0.0025522	0.0298945	0.0182965	Order	0.0516845	0.152043
Bacteria;Firmicutes;Bacilli;Lactobacillales;Lactobacillaceae	0.00094378	0.00273039	0.000466759	0.000538921	0.010634	0.000853747	0.000401175	0	0.00170294	0.0098128	0.00144057	0.0048219	0.0107034	0.00284741	0.00384271	0.0025522	0.0298945	0.0182965	Family	0.0424035	0.130439
Bacteria;Firmicutes;Bacilli;Lactobacillales;Lactobacillaceae;Lactobacillus	0.00094378	0.00273039	0.000466759	0.000538921	0.010634	0.000853747	0.000401175	0	0.00170294	0.0098128	0.00144057	0.0048219	0.0107034	0.00284741	0.00384271	0.0025522	0.0298945	0.0182965	Genus	0.0424035	0.130439
Bacteria;Firmicutes;Bacilli;Lactobacillales;Leuconostocaceae	0	0.00118199	0	0	0.000342909	0	0	0	0	0.000674478	0	0	0	0	0	0	0	0	Family	0.542592	0.586115
Bacteria;Firmicutes;Bacilli;Lactobacillales;Leuconostocaceae;Weissella	0	0.00118199	0	0	0.000342909	0	0	0	0	0.000674478	0	0	0	0	0	0	0	0	Genus	0.542592	0.586115
Bacteria;Firmicutes;Bacilli;Lactobacillales;Streptococcaceae	0	0.000223027	0.000994722	0	0	0	0.000309465	0.000364891	0.00012749	0	0	0	0	0	0	0	0	0	Family	0.0530905	0.153204
Bacteria;Firmicutes;Bacilli;Lactobacillales;Streptococcaceae;Streptococcus	0	0.000223027	0.000994722	0	0	0	0.000309465	0.000364891	0.00012749	0	0	0	0	0	0	0	0	0	Genus	0.0530905	0.153204
Bacteria;Firmicutes;Clostridia	0.0682261	0.380958	0.206426	0.255633	0.284733	0.276399	0.194605	0.141992	0.208981	0.735423	0.791494	0.674117	0.574923	0.548316	0.642961	0.568741	0.673109	0.438578	Class	1.91381e-07	2.31953e-05
Bacteria;Firmicutes;Clostridia;Clostridiales	0.0682261	0.380958	0.206426	0.255633	0.284733	0.276399	0.194605	0.141992	0.208981	0.735423	0.791494	0.674117	0.574923	0.548316	0.642961	0.568741	0.673109	0.438578	Order	1.91381e-07	2.31953e-05
Bacteria;Firmicutes;Clostridia;Clostridiales;Clostridiaceae	0.0218168	0.263306	0.083707	0.0399151	0.106451	0.127753	0.0684729	0.0418523	0.0818282	0.0651831	0.138658	0.0547207	0.0886672	0.0246307	0.0229091	0.0478443	0.015742	0.0448483	Family	0.195237	0.298019
Bacteria;Firmicutes;Clostridia;Clostridiales;Clostridiaceae;Butyricicoccus	0.000605554	0.000424748	0.000279463	0.000298941	0.00253783	0	0.00641831	0.000337801	0	0.00516029	0.00374049	0.000418864	0	0.00159931	0	0.0051675	0.000678509	0.00129083	Genus	0.435903	0.49283
Bacteria;Firmicutes;Clostridia;Clostridiales;Clostridiaceae;Clostridium	0.0212113	0.262881	0.0834275	0.0396162	0.103913	0.127753	0.0620546	0.0415145	0.0818282	0.0588477	0.134918	0.0480296	0.0886672	0.0207976	0.0229091	0.0426768	0.0150635	0.0435575	Genus	0.174815	0.288349
Bacteria;Firmicutes;Clostridia;Clostridiales;Eubacteriaceae	0.00709056	0.00120217	0.0020186	0.00423943	0.00285486	0.0190286	0.000367709	0.000446312	0.00252027	0.00194217	0	0.000797979	0	0	0.00179421	0	0.00837071	0.00674339	Family	0.329179	0.400643
Bacteria;Firmicutes;Clostridia;Clostridiales;Eubacteriaceae;Eubacterium	0.00709056	0.00120217	0.0020186	0.00423943	0.00285486	0.0190286	0.000367709	0.000446312	0.00252027	0.00194217	0	0.000797979	0	0	0.00179421	0	0.00837071	0.00674339	Genus	0.329179	0.400643
Bacteria;Firmicutes;Clostridia;Clostridiales;Lachnospiraceae	0.00274006	0.00672172	0.0341467	0.00915773	0.0130878	0.00745636	0.0037213	0.0181083	0.00692627	0.00353066	0.00768754	0.002702	0.0168929	0.00890409	0.063806	0.00702917	0.0165652	0.000548768	Family	0.700174	0.737922
Bacteria;Firmicutes;Clostridia;Clostridiales;Lachnospiraceae;Anaerostipes	0	0	0.000130171	0	0	0.000227154	0	0	0.000498184	0	0	0	0	0.0019865	0	0.00207259	0	0	Genus	0.258528	0.339108
Bacteria;Firmicutes;Clostridia;Clostridiales;Lachnospiraceae;Blautia	0.000280267	0.000486341	0.0331419	0.00129011	0.000392863	0.00033794	0	0.00813109	0.00188905	0.00169523	0	0.00189096	0.00442571	0.00543835	0.0363185	0	0.00345789	0.000548768	Genus	0.871064	0.881244
Bacteria;Firmicutes;Clostridia;Clostridiales;Lachnospiraceae;Butyrivibrio	0	0.000372599	0	0.00188502	0	0.000217036	0.000139222	0.000868667	0	0	0	0	0	0	0	0	0	0	Genus	0.0835687	0.197823
Bacteria;Firmicutes;Clostridia;Clostridiales;Lachnospiraceae;Coprococcus	0	0	0	0	0.00010432	0.000471232	0	0.00762475	0	0	0	0	0	0.000483707	0	0.00205533	0	0	Genus	0.48067	0.53447
Bacteria;Firmicutes;Clostridia;Clostridiales;Lachnospiraceae;Dorea	0	0.000389062	0	0.000636133	0.0105743	0	0	0.000879205	0.00276978	0	0.00116419	0	0	0.000995537	0	0	0	0	Genus	0.227788	0.317281
Bacteria;Firmicutes;Clostridia;Clostridiales;Lachnospiraceae;Lachnoclostridium	0	0	0	0	0	0	0	0	0	0.000772641	0	0	0.000940355	0	0.00545286	0	0	0	Genus	0.199716	0.302722
Bacteria;Firmicutes;Clostridia;Clostridiales;Lachnospiraceae;Lachnospira	0	0	0	0	0	0	0.000314376	0.000104398	0	0	0	0	0	0	0	0	0	0	Genus	0.20728	0.308628
Bacteria;Firmicutes;Clostridia;Clostridiales;Lachnospiraceae;Roseburia	0.000787066	0.00419545	0.000874646	0.00430522	0.00201634	0.0041392	0.000716316	0.000500143	0.000670439	0.00106279	0.00652335	0	0.0115268	0	0.0162116	0.00179572	0.00470498	0	Genus	0.212027	0.312624
Bacteria;Firmicutes;Clostridia;Clostridiales;Lachnospiraceae;Tyzzerella	0.00143428	0.00127826	0	0.00104125	0	0	0.00195189	0	0.000763588	0	0	0.000811047	0	0	0.00582301	0.00110553	0.00840237	0	Genus	0.328753	0.400643
Bacteria;Firmicutes;Clostridia;Clostridiales;NA;Intestinimonas	0	0.000680462	0.000867341	0.000764539	0.000788524	0.000524057	0.00088642	0.000426125	0.00123549	0.00402264	0.00286981	0.000773214	0.00351396	0	0.00163701	0.00102439	0.00298544	0.00115499	Genus	0.0141843	0.0698834
Bacteria;Firmicutes;Clostridia;Clostridiales;NA;Pseudoflavonifractor	0	0	0	0	0	0	0	0	0	0	0	0	0.00635488	0	0	0.00598716	0	0	Genus	0.150286	0.281014
Bacteria;Firmicutes;Clostridia;Clostridiales;Oscillospiraceae	0.00284718	0.00841132	0.0102346	0.0127863	0.00446083	0.00823341	0.0112628	0.00360619	0.00840589	0.115996	0.0830925	0.0865621	0.0518339	0.0595701	0.0516838	0.0672941	0.0747427	0.0610399	Family	7.67086e-08	2.31953e-05
Bacteria;Firmicutes;Clostridia;Clostridiales;Oscillospiraceae;Oscillibacter	0.00284718	0.00841132	0.0102346	0.0127863	0.00446083	0.00823341	0.0112628	0.00360619	0.00840589	0.115996	0.0830925	0.0865621	0.0518339	0.0595701	0.0516838	0.0672941	0.0747427	0.0610399	Genus	7.67086e-08	2.31953e-05
Bacteria;Firmicutes;Clostridia;Clostridiales;Peptostreptococcaceae	0.000570811	0.00218675	0	0.00710748	0.000967012	0.0032683	0.000154921	0.0013727	0.000622019	0	0.00306004	0.00777506	0.000942568	0.016205	0.0074183	0.0127351	0	0.000579991	Family	0.11007	0.234043
Bacteria;Firmicutes;Clostridia;Clostridiales;Peptostreptococcaceae;Clostridioides	0	0.00183059	0	0.00163444	0	0.00215333	0	0	0.000169586	0	0	0.00330036	0	0.0132248	0.006811	0.0063203	0	0	Genus	0.114167	0.240227
Bacteria;Firmicutes;Clostridia;Clostridiales;Peptostreptococcaceae;Intestinibacter	0.000570811	0.000356161	0	0.000774512	0.000518668	0.00111498	0.000154921	0.000143394	0.000452433	0	0.00169228	0.0044747	0.000942568	0.00298026	0.000607299	0.0064148	0	0.000579991	Genus	0.0614964	0.16203
Bacteria;Firmicutes;Clostridia;Clostridiales;Peptostreptococcaceae;Romboutsia	0	0	0	0.000422659	0.000229858	0	0	0.000341733	0	0	0.00136776	0	0	0	0	0	0	0	Genus	0.801677	0.824815
Bacteria;Firmicutes;Clostridia;Clostridiales;Peptostreptococcaceae;Terrisporobacter	0	0	0	0.00361244	0.000218487	0	0	0.000648611	0	0	0	0	0	0	0	0	0	0	Genus	0.226792	0.317281
Bacteria;Firmicutes;Clostridia;Clostridiales;Ruminococcaceae	0.00530381	0.0315652	0.0126394	0.0502942	0.0103217	0.0162193	0.0139485	0.00775556	0.0121932	0.0700826	0.127249	0.0712847	0.138509	0.0324998	0.219132	0.0390896	0.107146	0.0538468	Family	0.00157022	0.0142023
Bacteria;Firmicutes;Clostridia;Clostridiales;Ruminococcaceae;Anaerotruncus	0	0	0	0	0	0	0	0.000393462	0.000282231	0	0	0	0	0	0	0.00357637	0	0	Genus	0.432849	0.490292
Bacteria;Firmicutes;Clostridia;Clostridiales;Ruminococcaceae;Faecalibacterium	0.00179768	0.0046219	0.00231644	0.0070042	0.00320196	0.00858009	0.00461418	0.00260063	0.00375088	0.0122174	0.0412596	0.013072	0.0438622	0.00848945	0.126752	0.0118734	0.0243595	0.0046092	Genus	0.0466395	0.140615
Bacteria;Firmicutes;Clostridia;Clostridiales;Ruminococcaceae;Flavonifractor	0.000154682	0.00247056	0.00100124	0.00267636	0.000675579	0.00196104	0.00191167	0.00134288	0.00117824	0.0211065	0.00416755	0.00809382	0.00517138	0.00627135	0.00748091	0.00613623	0.00535606	0.00598708	Genus	0.00236217	0.0193443
Bacteria;Firmicutes;Clostridia;Clostridiales;Ruminococcaceae;Fournierella	0	0.000295056	0	0.000253482	0.000105391	0	0.000168492	0	0.000570671	0	0	0	0	0	0	0	0	0	Genus	0.0292306	0.101426
Bacteria;Firmicutes;Clostridia;Clostridiales;Ruminococcaceae;Pseudoflavonifractor	0.000286249	0.00111313	0.0029182	0.000575128	0.000475249	0.000326469	0.00181148	0.000639038	0.000620657	0.00666208	0.00461384	0.00502902	0.00598873	0.00182162	0.0172836	0.00327605	0.0377977	0.00185207	Genus	0.0462874	0.140251
Bacteria;Firmicutes;Clostridia;Clostridiales;Ruminococcaceae;Ruminococcus	0.000787183	0.0188645	0.00464405	0.0366168	0.00475879	0.00104344	0.00167597	0.000476541	0.00375777	0.0136255	0.0459643	0.040195	0.0488606	0.0123575	0.0246101	0.00938295	0.0236417	0.0337367	Genus	0.00653358	0.0404015
Bacteria;Firmicutes;Clostridia;Clostridiales;Ruminococcaceae;Ruthenibacterium	7.49381e-05	0.000124477	0.000400036	0.000559772	0.000367744	0.000525332	0.00010595	0.000860364	0	0	0.000624192	0	0.000998981	0	0	0	0	0	Genus	0.333363	0.40083
Bacteria;Firmicutes;Erysipelotrichia	0.000262911	0	0	0	0.000209531	0	0.000280316	0	0.000607828	0	0	0	0.000951975	0.00466771	0.00352177	0	0	0	Class	0.170802	0.28814
Bacteria;Firmicutes;Erysipelotrichia;Erysipelotrichales	0.000262911	0	0	0	0.000209531	0	0.000280316	0	0.000607828	0	0	0	0.000951975	0.00466771	0.00352177	0	0	0	Order	0.170802	0.28814
Bacteria;Firmicutes;Erysipelotrichia;Erysipelotrichales;Erysipelotrichaceae	0.000262911	0	0	0	0.000209531	0	0.000280316	0	0.000607828	0	0	0	0.000951975	0.00466771	0.00352177	0	0	0	Family	0.170802	0.28814
Bacteria;Firmicutes;Erysipelotrichia;Erysipelotrichales;Erysipelotrichaceae;Candidatus	0.000262911	0	0	0	0	0	0.000280316	0	0.000412435	0	0	0	0.000951975	0.00369616	0.00352177	0	0	0	Genus	0.145622	0.281014
Bacteria;Firmicutes;Erysipelotrichia;Erysipelotrichales;Erysipelotrichaceae;Holdemanella	0	0	0	0	0.000209531	0	0	0	0.000195393	0	0	0	0	0.000971549	0	0	0	0	Genus	0.581762	0.625084
Bacteria;Firmicutes;Negativicutes	0.00695455	0.0231951	0.00526096	0.0438574	0.0288594	0.0330208	0.0350503	0.0215956	0.0251374	0	0	0	0	0	0	0	0	0	Class	2.20385e-05	0.000840737
Bacteria;Firmicutes;Negativicutes;Acidaminococcales	0.00551437	0.0110889	0.00424828	0.0309517	0.0268596	0.0238739	0.0287316	0.0213413	0.0212587	0	0	0	0	0	0	0	0	0	Order	2.63597e-05	0.000840737
Bacteria;Firmicutes;Negativicutes;Acidaminococcales;Acidaminococcaceae	0.00551437	0.0110889	0.00424828	0.0309517	0.0268596	0.0238739	0.0287316	0.0213413	0.0212587	0	0	0	0	0	0	0	0	0	Family	2.63597e-05	0.000840737
Bacteria;Firmicutes;Negativicutes;Acidaminococcales;Acidaminococcaceae;Phascolarctobacterium	0.00551437	0.0110889	0.00424828	0.0309517	0.0268596	0.0238739	0.0287316	0.0213413	0.0212587	0	0	0	0	0	0	0	0	0	Genus	2.63597e-05	0.000840737
Bacteria;Firmicutes;Negativicutes;Selenomonadales	0.00144018	0.0121062	0.00101268	0.0129056	0.00199977	0.00914685	0.00631875	0.000254322	0.00387867	0	0	0	0	0	0	0	0	0	Order	0.00412675	0.0276174
Bacteria;Firmicutes;Negativicutes;Selenomonadales;Selenomonadaceae	0.00144018	0.0121062	0.00101268	0.0129056	0.00199977	0.00914685	0.00631875	0.000254322	0.00387867	0	0	0	0	0	0	0	0	0	Family	0.00412675	0.0276174
Bacteria;Firmicutes;Tissierellia	0.000164976	0	0	0	0.000114829	0.000121205	0	0	0	0.000409384	0	0	0	0	0	0	0	0.000339746	Class	0.527249	0.576738
Bacteria;Fusobacteria	0	0.000161172	0	0	0	0.000226712	0	0	0	0.00180353	0	0	0	0	0	0	0.000633538	0	Phylum	0.28534	0.360242
Bacteria;Fusobacteria;Fusobacteriia	0	0.000161172	0	0	0	0.000226712	0	0	0	0.00180353	0	0	0	0	0	0	0.000633538	0	Class	0.28534	0.360242
Bacteria;Fusobacteria;Fusobacteriia;Fusobacteriales	0	0.000161172	0	0	0	0.000226712	0	0	0	0.00180353	0	0	0	0	0	0	0.000633538	0	Order	0.28534	0.360242
Bacteria;Fusobacteria;Fusobacteriia;Fusobacteriales;Fusobacteriaceae	0	0.000161172	0	0	0	0.000226712	0	0	0	0.00180353	0	0	0	0	0	0	0.000633538	0	Family	0.28534	0.360242
Bacteria;Fusobacteria;Fusobacteriia;Fusobacteriales;Fusobacteriaceae;Fusobacterium	0	0.000161172	0	0	0	0.000226712	0	0	0	0.00180353	0	0	0	0	0	0	0.000633538	0	Genus	0.28534	0.360242
Bacteria;Lentisphaerae	0	0.00191836	0.0160912	0	0	0	0.00751379	0.00209281	0.00545693	0	0	0	0	0	0	0	0	0	Phylum	0.0572785	0.159831
Bacteria;Proteobacteria	0.26797	0.0225635	0.0550777	0.0113664	0.0173863	0.120824	0.0191223	0.0615615	0.0157164	0	0	0	0.00403211	0.00463328	0	0.00259005	0	0.00830178	Phylum	0.0366798	0.118866
Bacteria;Proteobacteria;Alphaproteobacteria	0.00595932	0.00620464	0.00976903	0.0101698	0.0165876	0.0055867	0.0130268	0.00354422	0.00490204	0	0	0	0	0	0	0	0	0.00706438	Class	0.000256308	0.00361215
Bacteria;Proteobacteria;Alphaproteobacteria;Rhodospirillales	0.00595932	0.00620464	0.00976903	0.0101698	0.0165876	0.0055867	0.0130268	0.00354422	0.00490204	0	0	0	0	0	0	0	0	0.00706438	Order	0.000256308	0.00361215
Bacteria;Proteobacteria;Alphaproteobacteria;Rhodospirillales;Rhodospirillaceae	0.00595932	0.00620464	0.00976903	0.0101698	0.0165876	0.0055867	0.0130268	0.00354422	0.00490204	0	0	0	0	0	0	0	0	0.00706438	Family	0.000256308	0.00361215
Bacteria;Proteobacteria;Alphaproteobacteria;Rhodospirillales;Rhodospirillaceae;Azospirillum	0.00411674	0.0054567	0.0088468	0.00234376	0.000444929	0.00346825	0.00486615	0.00249349	0.00315445	0	0	0	0	0	0	0	0	0	Genus	0.000145204	0.0025141
Bacteria;Proteobacteria;Deltaproteobacteria	0.000176149	0.00848426	0.00105365	0.00119654	0.000798715	0	0.00197557	0.00822022	0.00202076	0	0	0	0.00403211	0.00463328	0	0.00259005	0	0.0012374	Class	0.331345	0.400643
Bacteria;Proteobacteria;Deltaproteobacteria;Desulfovibrionales	0.000176149	0.00848426	0.00105365	0.00119654	0.000798715	0	0.00197557	0.00822022	0.00202076	0	0	0	0.00403211	0.00463328	0	0.00259005	0	0.0012374	Order	0.331345	0.400643
Bacteria;Proteobacteria;Deltaproteobacteria;Desulfovibrionales;Desulfovibrionaceae	0.000176149	0.00848426	0.00105365	0.00119654	0.000798715	0	0.00197557	0.00822022	0.00202076	0	0	0	0.00403211	0.00463328	0	0.00259005	0	0.0012374	Family	0.331345	0.400643
Bacteria;Proteobacteria;Deltaproteobacteria;Desulfovibrionales;Desulfovibrionaceae;Bilophila	0	0.000362739	6.3536e-05	0	0	0	0	0	0	0	0	0	0.00078088	0.00277565	0	0.00259005	0	0.0012374	Genus	0.0611648	0.16203
Bacteria;Proteobacteria;Deltaproteobacteria;Desulfovibrionales;Desulfovibrionaceae;Desulfovibrio	0	0.00787702	0.000611469	0	0.000374294	0	0.00169255	0.00803532	0.00123919	0	0	0	0	0	0	0	0	0	Genus	0.0633846	0.164854
Bacteria;Proteobacteria;Deltaproteobacteria;Desulfovibrionales;Desulfovibrionaceae;Mailhella	0.000176149	0.000244497	0.000378643	0.00119654	0.000424421	0	0.000283024	0.000184897	0.000781571	0	0	0	0.00325123	0.00185764	0	0	0	0	Genus	0.702754	0.738075
Bacteria;Proteobacteria;Gammaproteobacteria	0.257441	0.00618787	0.04344	0	0	0.115237	0.00411991	0.0497971	0.00879358	0	0	0	0	0	0	0	0	0	Class	0.0755947	0.186981
Bacteria;Proteobacteria;Gammaproteobacteria;Aeromonadales	0.255328	0.00405774	0.0426549	0	0	0.115237	0.00339536	0	0.00142186	0	0	0	0	0	0	0	0	0	Order	0.125296	0.256518
Bacteria;Proteobacteria;Gammaproteobacteria;Aeromonadales;Succinivibrionaceae	0.255328	0.00405774	0.0426549	0	0	0.115237	0.00339536	0	0.00142186	0	0	0	0	0	0	0	0	0	Family	0.125296	0.256518
Bacteria;Proteobacteria;Gammaproteobacteria;Aeromonadales;Succinivibrionaceae;Succinivibrio	0.172364	0.00332547	0.0286963	0	0	0.0773002	0.00143373	0	0.000927103	0	0	0	0	0	0	0	0	0	Genus	0.126243	0.256722
Bacteria;Proteobacteria;Gammaproteobacteria;Enterobacterales	5.13513e-05	0.000171056	0	0	0	0	0	0	0	0	0	0	0	0	0	0	0	0	Order	0.21521	0.312836
Bacteria;Proteobacteria;Gammaproteobacteria;Pseudomonadales	0.00206126	0.00195907	0.000785086	0	0	0	0.000724544	0.0497971	0.00737173	0	0	0	0	0	0	0	0	0	Order	0.21608	0.312836
Bacteria;Proteobacteria;Gammaproteobacteria;Pseudomonadales;Moraxellaceae	0.00206126	0.00195907	0.000785086	0	0	0	0.000724544	0.0497971	0.00737173	0	0	0	0	0	0	0	0	0	Family	0.21608	0.312836
Bacteria;Proteobacteria;Gammaproteobacteria;Pseudomonadales;Moraxellaceae;Acinetobacter	0.00206126	0.00195907	0.000785086	0	0	0	0.000724544	0.0497971	0.00737173	0	0	0	0	0	0	0	0	0	Genus	0.21608	0.312836
Bacteria;Spirochaetes	0.0911176	0.01062	0.0399739	0.0369937	0.0226941	0.0191328	0.00489013	0.00404514	0.0147573	0.00291279	0	0.00595306	0.00546792	0.0107844	0.00183921	0.00444171	0.0067203	0	Phylum	0.0231729	0.0913208
Bacteria;Spirochaetes;Spirochaetia	0.0911176	0.01062	0.0399739	0.0369937	0.0226941	0.0191328	0.00489013	0.00404514	0.0147573	0.00291279	0	0.00595306	0.00546792	0.0107844	0.00183921	0.00444171	0.0067203	0	Class	0.0231729	0.0913208
Bacteria;Spirochaetes;Spirochaetia;Brachyspirales	0	0	0	0	0	0.000224758	0.000430316	0.000459681	0	0.00291279	0	0.00595306	0.00546792	0.0107844	0.00183921	0.00395252	0.0067203	0	Order	0.00302176	0.0226073
Bacteria;Spirochaetes;Spirochaetia;Brachyspirales;Brachyspiraceae	0	0	0	0	0	0.000224758	0.000430316	0.000459681	0	0.00291279	0	0.00595306	0.00546792	0.0107844	0.00183921	0.00395252	0.0067203	0	Family	0.00302176	0.0226073
Bacteria;Spirochaetes;Spirochaetia;Brachyspirales;Brachyspiraceae;Brachyspira	0	0	0	0	0	0.000224758	0.000430316	0.000459681	0	0.00291279	0	0.00595306	0.00546792	0.0107844	0.00183921	0.00395252	0.0067203	0	Genus	0.00302176	0.0226073
Bacteria;Spirochaetes;Spirochaetia;Spirochaetales	0.0911176	0.01062	0.0399739	0.0369937	0.0226941	0.018908	0.00445981	0.00358546	0.0147573	0	0	0	0	0	0	0.000489195	0	0	Order	0.00905563	0.0508122
Bacteria;Spirochaetes;Spirochaetia;Spirochaetales;Spirochaetaceae	0.0911176	0.01062	0.0399739	0.0369937	0.0226941	0.018908	0.00445981	0.00358546	0.0147573	0	0	0	0	0	0	0.000489195	0	0	Family	0.00905563	0.0508122
Bacteria;Spirochaetes;Spirochaetia;Spirochaetales;Spirochaetaceae;Sphaerochaeta	0	0	0	0	0	0	0.000474133	0	0.000195393	0	0	0	0	0	0	0	0	0	Genus	0.190472	0.295207
Bacteria;Spirochaetes;Spirochaetia;Spirochaetales;Spirochaetaceae;Treponema	0.0911176	0.01062	0.0399739	0.0369937	0.0226941	0.018908	0.00398568	0.00358546	0.0145619	0	0	0	0	0	0	0.000489195	0	0	Genus	0.00933801	0.0519159
Bacteria;Tenericutes	0.0139945	0.00586759	0.0150514	0	0	0	0.0172008	0	0.0150994	0.000765454	0.00357057	0.00438074	0	0.00415946	0	0.00519343	0	0	Phylum	0.0589499	0.160196
Bacteria;Tenericutes;Mollicutes	0.0139945	0.00586759	0.0150514	0	0	0	0.0172008	0	0.0150994	0.000765454	0.00357057	0.00438074	0	0.00415946	0	0.00519343	0	0	Class	0.0589499	0.160196
Bacteria;Tenericutes;Mollicutes;Mycoplasmatales	0.0139945	0.00586759	0.0150514	0	0	0	0.0172008	0	0.0150994	0.000765454	0.00357057	0.00438074	0	0.00415946	0	0.00519343	0	0	Order	0.0589499	0.160196
Bacteria;Tenericutes;Mollicutes;Mycoplasmatales;Mycoplasmataceae	0.0139945	0.00586759	0.0150514	0	0	0	0.0172008	0	0.0150994	0.000765454	0.00357057	0.00438074	0	0.00415946	0	0.00519343	0	0	Family	0.0589499	0.160196
Bacteria;Tenericutes;Mollicutes;Mycoplasmatales;Mycoplasmataceae;Mycoplasma	0.0139945	0.00586759	0.0150514	0	0	0	0.0172008	0	0.0150994	0.000765454	0.00357057	0.00438074	0	0.00415946	0	0.00519343	0	0	Genus	0.0589499	0.160196
Bacteria;Verrucomicrobia	0.00136166	0.00415045	0.00551723	0.000728581	0.00615765	0.00107881	0.00354158	0.000264967	0.00536506	0	0.00219201	0	0.0207514	0.136776	0.00629125	0.0302046	0	0	Phylum	0.226407	0.317281
Bacteria;Verrucomicrobia;Opitutae	0.00136166	0.00415045	0.00551723	0.000728581	0.00615765	0.00107881	0.00354158	0.000264967	0.00536506	0	0.00219201	0	0.00886947	0.135279	0.00313259	0.0302046	0	0	Class	0.271947	0.350638
Bacteria;Verrucomicrobia;Opitutae;Puniceicoccales	0.00136166	0.00415045	0.00551723	0.000728581	0.00615765	0.00107881	0.00354158	0.000264967	0.00536506	0	0.00219201	0	0.00886947	0.135279	0.00313259	0.0302046	0	0	Order	0.271947	0.350638
Bacteria;Verrucomicrobia;Opitutae;Puniceicoccales;Puniceicoccaceae	0.00136166	0.00415045	0.00551723	0.000728581	0.00615765	0.00107881	0.00354158	0.000264967	0.00536506	0	0.00219201	0	0.00886947	0.135279	0.00313259	0.0302046	0	0	Family	0.271947	0.350638
Bacteria;Verrucomicrobia;Opitutae;Puniceicoccales;Puniceicoccaceae;Coraliomargarita	0.00136166	0.00415045	0.00551723	0.000728581	0.00615765	0.00107881	0.00354158	0.000264967	0.00536506	0	0.00219201	0	0.00886947	0.135279	0.00313259	0.0302046	0	0	Genus	0.271947	0.350638
Bacteria;Verrucomicrobia;Verrucomicrobiae	0	0	0	0	0	0	0	0	0	0	0	0	0.0118819	0.00149679	0.00315866	0	0	0	Class	0.17891	0.288349
Bacteria;Verrucomicrobia;Verrucomicrobiae;Verrucomicrobiales	0	0	0	0	0	0	0	0	0	0	0	0	0.0118819	0.00149679	0.00315866	0	0	0	Order	0.17891	0.288349
Bacteria;Verrucomicrobia;Verrucomicrobiae;Verrucomicrobiales;Akkermansiaceae	0	0	0	0	0	0	0	0	0	0	0	0	0.0118819	0.00149679	0.00315866	0	0	0	Family	0.17891	0.288349
Bacteria;Verrucomicrobia;Verrucomicrobiae;Verrucomicrobiales;Akkermansiaceae;Akkermansia	0	0	0	0	0	0	0	0	0	0	0	0	0.0118819	0.00149679	0.00315866	0	0	0	Genus	0.17891	0.288349
bacterium LF-3 [ref_mOTU_v25_03628]	0	0	0	0.000219211	0.000115548	0.000365891	7.82359e-05	0.000113645	0.000179986	0	0.000777936	0.000384838	0.000959709	0	0.00111894	0	0.00124393	0	Species	0.0523649	0.153204
bacterium OL-1 [ref_mOTU_v25_03955]	0.000148036	0.000119669	0	0	0.000862329	0.000209118	0.000134143	0	0.000214002	0	0	0	0	0	0	0	0	0	Species	0.0514322	0.152043
Bacteroidales bacterium [ref_mOTU_v25_05845]	0.0122237	0.0354276	0.034759	0.00149517	0.0103184	0.0215775	0.0126029	0.0018995	0.0108946	0	0	0	0	0	0	0	0	0	Species	0.00170804	0.015001
Bacteroidales bacterium 52_46 [meta_mOTU_v25_12812]	0	0.000263741	0	0	0	0	0.000484516	0	0	0	0	0	0.00495824	0	0.00623184	0	0	0	Species	0.181858	0.290185
Bacteroidales bacterium H1 [ref_mOTU_v25_10022]	0	0	0	0.000211806	0	0	0.000140789	0	0	0	0	0	0	0	0	0	0	0	Species	0.159908	0.28589
Bacteroidales bacterium H3 [ref_mOTU_v25_10023]	0.000429376	0	0	0	0	0	0	0	0	0	0	0	0	0.00187443	0	0	0	0	Species	0.463283	0.517034
Bacteroidales bacterium M3 [ref_mOTU_v25_10010]	0.00533638	0.000303074	0	0.00043408	0	0	0	0.00109824	0	0	0	0	0	0	0	0	0	0	Species	0.188654	0.295207
Bacteroidales bacterium M7 [ref_mOTU_v25_10013]	0	0	0	0	0.000543076	0	0.000367709	0	0	0	0	0	0	0	0	0	0	0	Species	0.15907	0.28589
Bacteroidales species incertae sedis [meta_mOTU_v25_12262]	0.000435037	0.000779939	0.000649873	0	0.000291239	0.000789294	0.0011923	0.00257352	0.00253036	0	0	0	0.00469902	0	0.00350365	0	0	0	Species	0.868254	0.879869
Bacteroidales species incertae sedis [meta_mOTU_v25_12713]	0.00436187	0.000205629	0.00462019	0.0206046	0.00124201	0.00199328	0.000387216	0.00110804	0.000435183	0	0	0	0	0	0	0	0	0	Species	0.0911792	0.208508
Bacteroidales species incertae sedis [meta_mOTU_v25_12772]	0.0137772	0.000383269	0.0805678	0.00129267	0.00125446	0.000755353	0	0.0862035	0	0	0	0	0	0	0	0	0	0	Species	0.107	0.229123
Bacteroidales species incertae sedis [meta_mOTU_v25_12775]	0.064946	0.0055852	0.0545056	0.00180981	0.00140586	0.0137057	0.07421	0.0262552	0.0275175	0	0	0	0.0410685	0	0.0775644	0	0	0	Species	0.218592	0.315396
Bacteroidales species incertae sedis [meta_mOTU_v25_12808]	0.0265809	0.0302268	0.0378344	0.00410548	0.00587091	0.0174134	0.00440328	0.0396781	0.00267299	0	0	0	0	0	0	0	0	0	Species	0.00190925	0.0165286
Bacteroidales species incertae sedis [meta_mOTU_v25_12950]	0.036669	0.0307229	0.0140704	0	0	0.0349853	0.00477186	0	0.00453653	0	0	0	0	0	0	0	0	0	Species	0.0173484	0.0796448
Bacteroidales species incertae sedis [meta_mOTU_v25_13098]	0.00198878	0.00408777	0.000318763	0.00153747	0.00108297	0.00176378	0.000366631	0	0.000588764	0	0	0	0	0	0	0	0	0	Species	0.00663132	0.0405917
Bacteroidales species incertae sedis [meta_mOTU_v25_13211]	0	0	0.020857	0.00312152	0.0021723	0	0	0.012038	0	0	0	0	0	0	0	0	0	0	Species	0.10258	0.222012
Bacteroidales species incertae sedis [meta_mOTU_v25_13286]	0.000331463	0.00125243	0.000528479	0.00032954	0.0012111	0.00059598	0.0018879	0.00212685	0.00149412	0	0	0	0.00374579	0	0.00299998	0	0	0	Species	0.549791	0.592835
Bacteroidales species incertae sedis [meta_mOTU_v25_13342]	0.00104339	0	0.00280511	0.00221796	0.00108615	0.00990293	0.0144952	0	0.0174126	0	0	0	0	0	0	0	0	0	Species	0.0270872	0.0977075
Bacteroidales species incertae sedis [meta_mOTU_v25_13388]	0.000775675	0.00144661	0.000319671	0	0	0.00339735	0.00109199	0	0.000325501	0	0	0	0	0	0	0	0	0	Species	0.0399586	0.125082
Bacteroidales species incertae sedis [meta_mOTU_v25_13688]	0.0130158	0.000637321	0.00437677	0.00191509	0.00490394	0.00919331	0.000834865	0.00118783	0.000848431	0	0	0	0.00189689	0	0.00129266	0	0	0	Species	0.0218686	0.0883491
Bacteroidales species incertae sedis [meta_mOTU_v25_14445]	0	0	0.000927276	0	0	0.031085	0	0	0	0	0	0	0	0	0	0	0	0	Species	0.316862	0.391875
Bacteroides caecimuris [ref_mOTU_v25_03476]	0.00137465	0	0.00279875	0.00119293	0	0	0	0.00239608	0	0	0	0.00162484	0.00535137	0	0	0	0	0.00575861	Species	0.542016	0.586115
Bacteroides cellulosilyticus/fragilis [ref_mOTU_v25_01597]	0	0	0.000165007	0	0	0	0	0	0	0	0	0	0	0.00125906	0.000441452	0.000708535	0	0	Species	0.12023	0.249754
Bacteroides dorei/vulgatus [ref_mOTU_v25_02367]	0.000512253	0.00069707	0.00452915	0.000783681	0.00123643	0.00321009	0	0.00809276	0	0	0	0.000554116	0.0161134	0.0169258	0.0580411	0.0588518	0	0	Species	0.0964182	0.213265
Bacteroides eggerthii [ref_mOTU_v25_01577]	0.000414501	0.000151537	0	0	0	0.00368082	0	0	0	0	0	0	0	0	0	0	0	0	Species	0.259676	0.339879
Bacteroides faecis/thetaiotaomicron [ref_mOTU_v25_01657]	0	0	6.37526e-05	0	0	0	0	0	0	0.000348302	0	0.000937425	0	0.00125906	0	0.00203016	0.000619139	0.00152261	Species	0.00865002	0.049452
Bacteroides finegoldii [ref_mOTU_v25_03474]	0.000128528	0	0	0	0	0	0	5.15915e-05	0	0	0	0	0	0	0	0	0	0	Species	0.192479	0.295297
Bacteroides intestinalis [ref_mOTU_v25_02809]	0	0.000817678	0.000987137	0	0	0.0101879	0.00185322	0	0.00159788	0	0	0	0	0	0	0	0	0	Species	0.133663	0.268211
Bacteroides massiliensis [ref_mOTU_v25_02135]	0.002483	0.0146981	0.00075294	0.000506259	0.000601964	0	0.00238828	0.00119442	0.000642412	0	0	0	0.000713378	0	0	0	0	0	Species	0.123691	0.254954
Bacteroides rodentium/uniformis [ref_mOTU_v25_00855]	0.00221067	0.00208086	0.00298043	0.00256796	0.00201956	0.00142887	0.00100065	0.00702707	0.00224093	0	0	0	0.00248322	0	0.00420818	0	0	0	Species	0.028233	0.100642
Bacteroides sartorii [ref_mOTU_v25_02366]	0.00193434	0.0134755	0	0.00352656	0.00668645	0	0.0112387	0	0.00625153	0	0.00156438	0	0	0	0	0	0	0	Species	0.0143548	0.0701531
Bacteroides sp. [ref_mOTU_v25_03475]	0.00230786	0.000112886	0.0037105	0.00119782	0.000560665	0	0	0.000789537	0	0	0	0.00164877	0.000661042	0.00125906	0.000774185	0.00490373	0	0.00823999	Species	0.356288	0.422525
Bacteroides sp. CAG:1060 [ref_mOTU_v25_07594]	0.011494	0.0136569	0.0170559	0.0240654	0.013378	0.0186833	0.0516007	0.00176885	0.0580719	0	0	0	0	0	0	0	0	0.000744295	Species	0.00202028	0.0170041
Bifidobacterium adolescentis [ref_mOTU_v25_02703]	0	0	0	0	0	0	0	0	0	0	0	0.000611542	0	0	0	0	0.00297187	0	Species	0.243368	0.324816
Bifidobacterium bifidum [ref_mOTU_v25_03116]	0	0	0	0	0	0	0	0	0	0.000220977	0	0.000338719	0	0	0	0	0	0.000550163	Species	0.0870038	0.202009
Bifidobacterium breve [ref_mOTU_v25_01098]	0	0	0	0	0	0	0	0	0	0.00166403	0	0	0	0	0	0	0	0.00110562	Species	0.159929	0.28589
Bifidobacterium dentium [ref_mOTU_v25_02698]	0	0	0	0	0	0	0	0	0	0.00035392	0	0.000723329	0	0	0	0	0.000927941	0.000587432	Species	0.0337239	0.109875
Bifidobacterium thermacidophilum/thermophilum [ref_mOTU_v25_02148]	0	0	0	0	0	0	0	0	0	0.0351283	0.00250719	0.0324065	0.00619068	0.00824938	0.00177187	0.00634811	0.102728	0.0598488	Species	0.0241844	0.0925726
Bifidobacterium thermophilum/boum [ref_mOTU_v25_02149]	0	0	0	0	0	0	0	0	0.00033904	0.0121873	0	0.0109348	0.00213796	0.00246024	0	0.00416442	0.0195693	0.0127471	Species	0.0072646	0.0431837
Bilophila wadsworthia [ref_mOTU_v25_04300]	0	0.000362739	6.3536e-05	0	0	0	0	0	0	0	0	0	0.00078088	0.00277565	0	0.00259005	0	0.0012374	Species	0.0611648	0.16203
Blautia massiliensis [ref_mOTU_v25_03342]	5.48554e-05	0	0.030804	0.000106262	0	0.000120905	0	0.00753022	0	0.00036641	0	0.000748857	0.00137994	0.00345649	0	0	0.00261318	0	Species	0.34648	0.411841
Blautia obeum [ref_mOTU_v25_05139]	0	0.0001242	0	0	0	0.000217036	0	0	0	0.000566913	0	0.0011421	0	0	0	0	0	0	Species	0.283604	0.360242
Blautia obeum [ref_mOTU_v25_05140]	0.000102346	0	0	0	0	0	0	5.4751e-05	0	0.00076191	0	0	0	0.00198186	0	0	0	0	Species	0.221951	0.317281
Blautia obeum/wexlerae [ref_mOTU_v25_02154]	0	9.46784e-05	0.00165095	0.000218194	0	0	0	0	0.00188905	0	0	0	0	0	0.0363185	0	0	0.000548768	Species	0.376934	0.436455
Blautia sp. [ref_mOTU_v25_03597]	6.8548e-05	0	0	0	0	0	0	0	0	0	0	0	0	0	0	0	0.000844717	0	Species	0.373348	0.434259
Brachyspira sp. CAG:700 [meta_mOTU_v25_12503]	0	0	0	0	0	0.000224758	0.000430316	0.000459681	0	0.00291279	0	0.00595306	0.00546792	0.0107844	0.00183921	0.00395252	0.0067203	0	Species	0.00302176	0.0226073
Butyricicoccus sp. [ref_mOTU_v25_02967]	0	0.000424748	0	0	0	0	0	0	0	0.00245937	0	0.000418864	0	0.00159931	0	0.00111241	0.000678509	0	Species	0.0428805	0.13124
Butyricicoccus species incertae sedis [meta_mOTU_v25_12336]	0.000101879	0	0.000279463	0.000298941	0	0	0.00422775	0.000337801	0	0.00270093	0.00374049	0	0	0	0	0	0	0.00129083	Species	0.681342	0.720582
Butyricicoccus species incertae sedis [meta_mOTU_v25_12617]	0.000503675	0	0	0	0.00253783	0	0.00219056	0	0	0	0	0	0	0	0	0.00405508	0	0	Species	0.820211	0.839608
Butyricimonas virosa [ref_mOTU_v25_02160]	0	0	0	0	0.000291239	0.000596238	0	0	0	0	0	0	0.0011679	0	0.00350365	0	0	0	Species	0.309779	0.384685
Butyrivibrio crossotus [ref_mOTU_v25_03686]	0	0.000372599	0	0.00188502	0	0.000217036	0.000139222	0.000868667	0	0	0	0	0	0	0	0	0	0	Species	0.0835687	0.197823
Candidatus Gastranaerophilus phascolarctosicola [ref_mOTU_v25_10435]	0.0322524	0.000730554	0.00670544	0.0320744	0.0307407	0.00149973	0.0031996	0.0114704	0.00707258	0	0	0	0	0	0	0	0	0	Species	0.00741106	0.0431837
Candidatus Stoquefichus sp. KLE1796 [ref_mOTU_v25_08610]	0.000262911	0	0	0	0	0	0.000280316	0	0.000412435	0	0	0	0.000951975	0.00369616	0.00352177	0	0	0	Species	0.145622	0.281014
Clostridiaceae species incertae sedis [meta_mOTU_v25_12983]	0	0	0	0	0	0	0	0	0	0.0011751	0	0.00627223	0	0.00223374	0	0	0	0	Species	0.144004	0.28065
Clostridiales sp. [ref_mOTU_v25_02968]	0	0	0.000427558	0.000426977	0.000704869	0	0	0.000365398	0.000329564	0	0.00227694	0.00452562	0	0.0023394	0	0	0.0074345	0.00298551	Species	0.040092	0.125082
Clostridiales species incertae sedis [meta_mOTU_v25_12228]	0	0.000170508	0.000456162	0	0.000770594	0	0.00033881	0	0.000248712	0.000813708	0.00749642	0.00490125	0.00145935	0.00384773	0	0.00650834	0	0	Species	0.020328	0.084122
Clostridiales species incertae sedis [meta_mOTU_v25_12237]	0	0	0.00139596	0.000694348	0	0	0	0	0	0.00194598	0.0129855	0	0.00254916	0.0106988	0.00402573	0.00486261	0.00249859	0	Species	0.0148217	0.0718558
Clostridiales species incertae sedis [meta_mOTU_v25_12251]	0	0.000985721	0.000724028	0.000388468	0.000546289	0	0.000862214	0.00027119	0.000773167	0.0142543	0.0076867	0.0061761	0.00532938	0.0172111	0.00351159	0.0188404	0.0150301	0.00594555	Species	0.000106681	0.00222927
Clostridiales species incertae sedis [meta_mOTU_v25_12252]	0	0	0.000489472	0	0	0	0.00042452	0.00192026	0	0	0	0	0	0	0.00100175	0	0	0	Species	0.406485	0.464017
Clostridiales species incertae sedis [meta_mOTU_v25_12253]	0.000597479	0.000753589	0.00155657	0.00177133	0.00221322	0.00225268	0.00248386	0.00223942	0.000777675	0.00435954	0.0104419	0.00565371	0.00508326	0.00317879	0.00946304	0.00393061	0.0254889	0.00521585	Species	0.0137728	0.0691799
Clostridiales species incertae sedis [meta_mOTU_v25_12254]	0.000680857	0.000929797	0.0019077	0.00519937	0.00256345	0.00126781	0.0020711	0.00127461	0.000801713	0.0194656	0.0302025	0.0148188	0.0165436	0.0195427	0.00913635	0.0253974	0.0474717	0.0142608	Species	8.57851e-05	0.00193637
Clostridiales species incertae sedis [meta_mOTU_v25_12265]	0	0.000187522	0	0	0	0	0	0	0.000388626	0.00577448	0	0.00286254	0.00142374	0.000756621	0.00126735	0	0.00653572	0.00239611	Species	0.0112473	0.0608557
Clostridiales species incertae sedis [meta_mOTU_v25_12272]	0	0.000255159	0.000309104	0	0	0	0	0	0	0	0	0	0	0	0	0	0	0	Species	0.152306	0.282255
Clostridiales species incertae sedis [meta_mOTU_v25_12284]	0	0.000164987	0	0	0	0	0	0.00296763	0	0	0	0	0	0	0.00180099	0	0	0	Species	0.705215	0.739377
Clostridiales species incertae sedis [meta_mOTU_v25_12288]	0.000201428	0.000460852	0.000485734	0.00111348	0.000456479	0.000664048	0.001519	0.000278663	0.00163029	0.0167326	0.00460324	0.0160597	0.0055254	0.0117015	0.00421477	0.0133901	0.00839416	0.00522849	Species	8.6274e-05	0.00193637
Clostridiales species incertae sedis [meta_mOTU_v25_12298]	0	0.000647205	0.000253857	0.000775888	0	0.000227443	0.000282853	0	0.000419268	0.00508155	0.00291896	0.00588389	0.00532459	0.00388724	0.00307564	0.00154538	0.00866795	0.00282875	Species	3.55046e-05	0.00102456
Clostridiales species incertae sedis [meta_mOTU_v25_12300]	0	0	0.00444851	0	0	0.000838272	0	0	0.000670442	0	0	0	0	0	0	0	0	0	Species	0.191981	0.295281
Clostridiales species incertae sedis [meta_mOTU_v25_12307]	0	0	0	0	0	0	0.00031578	0	0.000338773	0.00108799	0.01171	0.0112288	0	0	0	0	0.00187231	0.00319481	Species	0.0657233	0.168764
Clostridiales species incertae sedis [meta_mOTU_v25_12309]	0	0.000197128	0	0	0	0	0	0	0	0.0122056	0.00512652	0.00446782	0.0039514	0.0143177	0.00416294	0.00821397	0.00637243	0.00433778	Species	4.94077e-05	0.00136096
Clostridiales species incertae sedis [meta_mOTU_v25_12327]	0.000189134	0.000267653	0	0.00133978	0.000307743	0.00132434	0	0.00325026	0	0	0	0	0	0	0	0	0	0	Species	0.0562253	0.158477
Clostridiales species incertae sedis [meta_mOTU_v25_12334]	0.000390231	0.000286713	0.00205941	0.00127948	0.000488702	0.00100115	0.00132971	0.000234113	0.00107782	0.00658266	0.0047965	0.00689449	0.00949117	0.00220093	0.00278862	0.00321912	0.00297728	0.0028784	Species	0.000469313	0.00547483
Clostridiales species incertae sedis [meta_mOTU_v25_12340]	0	0.000267006	0.000589712	0.0231756	0.0231543	0	0.00854028	0.00318585	0.00759035	0	0	0	0	0	0	0	0	0	Species	0.0330973	0.108416
Clostridiales species incertae sedis [meta_mOTU_v25_12351]	0.00214805	0	0	0	0	0.00131116	0	0	0.00109295	0	0	0	0	0.0106876	0.00994273	0	0	0	Species	0.263403	0.342536
Clostridiales species incertae sedis [meta_mOTU_v25_12425]	0.000145739	0.00185722	0.000654369	0.00160329	0.000801341	0.000582785	0.00146094	0.000615876	0.000978293	0.0475867	0.00653574	0.0174898	0.0129144	0.0114066	0.00722824	0.00791143	0.0123835	0.00898448	Species	0.00534489	0.034828
Clostridiales species incertae sedis [meta_mOTU_v25_12434]	0.000331168	0.000302393	0.000723901	0.00241043	0	0.00495546	0	0	0.000306629	0	0	0	0	0	0	0	0	0	Species	0.0891301	0.205372
Clostridiales species incertae sedis [meta_mOTU_v25_12437]	0.000400781	0.00108301	0.0012091	0.00240847	0.000574261	0.00100636	0.00172338	0.00109201	0.000831266	0.0226997	0.00847741	0.0138155	0.00918796	0.00247446	0.0120949	0.00866317	0.0209246	0.00918042	Species	0.000120634	0.00229162
Clostridiales species incertae sedis [meta_mOTU_v25_12447]	0.00218783	0.000246206	0	0	0.001142	0.000457508	0	0.000535327	0	0.00106348	0	0	0	0	0	0	0	0	Species	0.171648	0.28814
Clostridiales species incertae sedis [meta_mOTU_v25_12452]	0	0.000128197	0.000128971	0.000314903	0.000157733	0.000388596	0.000142069	0.000211536	0.000419268	0.00553771	0.0117069	0.00850536	0.00165534	0.00982754	0.00237763	0.00810221	0.00175196	0.00240137	Species	0.000565259	0.00622812
Clostridiales species incertae sedis [meta_mOTU_v25_12463]	0.000129279	0.0261521	0.0131324	0.00129489	0.0013034	0.00103158	0.0157979	0.00769799	0.0126148	0.030709	0.0341957	0.00833921	0.0115744	0.020549	0.00506082	0.0273516	0.0617163	0.0135243	Species	0.0374666	0.12077
Clostridiales species incertae sedis [meta_mOTU_v25_12473]	0	0	0.000614838	0.000387331	0.000424473	0.000830924	0.000442048	0.000259711	0.000281833	0.00192483	0.00249467	0.00169729	0	0.00308887	0.000797287	0.00252682	0.00159311	0.00188358	Species	0.000469787	0.00547483
Clostridiales species incertae sedis [meta_mOTU_v25_12487]	0	0	0	0.000551564	0.00108297	0	0	0.000285947	0.000321779	0	0	0	0	0	0	0	0	0	Species	0.0613434	0.16203
Clostridiales species incertae sedis [meta_mOTU_v25_12491]	0	0.000736489	0.000358435	0.00117308	0.000420605	0.00121985	0.0009109	0.000211974	0.000882956	0.00410576	0.00997171	0.00153234	0.00619373	0	0.00581471	0	0.00679637	0.00340735	Species	0.00618278	0.0390288
Clostridiales species incertae sedis [meta_mOTU_v25_12494]	0	0.00100842	0.00123922	0.0029388	0.000746054	0.000726329	0.000563888	0.000367228	0.00093193	0.00416468	0	0.00154999	0.00183547	0	0.00696789	0	0	0	Species	0.451986	0.505629
Clostridiales species incertae sedis [meta_mOTU_v25_12516]	0.00123724	0.00210448	0.000386246	0.000644121	0.00152916	0.00105866	0.00234549	0.000862362	0.000995508	0.0341828	0.0141606	0.0166623	0.0050735	0.0273491	0.00379202	0.0264625	0.0205048	0.0113449	Species	0.00020831	0.00319645
Clostridiales species incertae sedis [meta_mOTU_v25_12521]	0	0	0	0	0	0	0	0	0	0	0.00593194	0.00183578	0.000909403	0	0.00307564	0	0	0	Species	0.0736096	0.182817
Clostridiales species incertae sedis [meta_mOTU_v25_12534]	0.000300772	0.00100961	0.000615884	0.00154034	0.000749604	0.000488467	0.000622012	0.000709105	0.000956601	0.00968819	0.00899984	0.00457617	0.00508971	0.00825216	0.0048613	0.0127676	0.0091131	0.00492107	Species	2.68043e-06	0.000162434
Clostridiales species incertae sedis [meta_mOTU_v25_12547]	0	0	0	0	0	0	0	0	0	0.00301968	0	0.00564148	0.00247302	0	0.00229897	0.00155046	0	0.00539291	Species	0.00647621	0.0404015
Clostridiales species incertae sedis [meta_mOTU_v25_12554]	0	0	0	0	0	0.0003177	0	0.000324588	0	0	0	0	0	0	0	0	0	0	Species	0.150097	0.281014
Clostridiales species incertae sedis [meta_mOTU_v25_12556]	0	0	0.000224427	0.00299496	0.00114138	0	0	0.00341588	0	0	0	0	0	0	0	0	0	0	Species	0.0789945	0.191087
Clostridiales species incertae sedis [meta_mOTU_v25_12561]	0.000547875	0	0.000209237	0.000186185	0.00736841	0.0134536	0.0111136	0.00306739	0.0243975	0	0	0	0	0	0	0	0	0	Species	0.0285871	0.101309
Clostridiales species incertae sedis [meta_mOTU_v25_12563]	0	0	0	0	0	0.00497111	0.00124675	0.000383169	0.00144236	0	0	0	0	0	0	0	0	0	Species	0.1199	0.249754
Clostridiales species incertae sedis [meta_mOTU_v25_12601]	0	0.000268462	0	0.00148661	0	0.000564416	0	0.0014676	0	0	0	0	0	0	0	0	0	0	Species	0.0618045	0.162136
Clostridiales species incertae sedis [meta_mOTU_v25_12623]	0	0	0	0	0	0	0	0	0	0.00338332	0.00203354	0.000587494	0	0	0.00104395	0	0	0	Species	0.0676759	0.171518
Clostridiales species incertae sedis [meta_mOTU_v25_12631]	0.000220946	0	0.000380355	0.000639015	0.000538326	0.000514757	0.00183854	0.000191269	0.000907174	0.0038714	0.00355457	0.00283805	0.00294686	0	0.00262929	0	0.00298544	0	Species	0.0170085	0.0786805
Clostridiales species incertae sedis [meta_mOTU_v25_12635]	0	0	0.0007162	0	0	0	0	0	0	0.00229269	0	0.0015066	0.00885595	0.0111348	0.00134862	0	0.00128711	0.00232473	Species	0.0324829	0.108093
Clostridiales species incertae sedis [meta_mOTU_v25_12648]	0.00177718	0.000889201	0	0	0	0.0027669	0.00246041	0	0.00305403	0	0	0	0	0	0	0	0	0	Species	0.01306	0.0677586
Clostridiales species incertae sedis [meta_mOTU_v25_12653]	0	0	0.000602198	0	0	0	0	0	0	0.00280482	0	0.0155986	0.00699802	0.00364791	0.00516197	0	0	0	Species	0.0441433	0.134426
Clostridiales species incertae sedis [meta_mOTU_v25_12655]	0	0.000502393	0	0	0	0	0	0	0.000468433	0	0	0	0	0	0	0	0	0	Species	0.150369	0.281014
Clostridiales species incertae sedis [meta_mOTU_v25_12665]	0	0	0	0	0	0	0	0	0	0	0	0	0.00199198	0	0.00458169	0	0	0	Species	0.186447	0.294237
Clostridiales species incertae sedis [meta_mOTU_v25_12667]	0	0.000311533	0	0.00055646	0	0.000883892	0	0.000624031	0.000460175	0.00544041	0.00413721	0.013675	0.00262099	0.00504031	0.00238978	0.00405111	0.00386683	0.00605669	Species	0.000484394	0.00547534
Clostridiales species incertae sedis [meta_mOTU_v25_12668]	0	0	0.000311609	0	0	0	0.000973432	0.000208796	0.0004079	0	0.00231969	0.00163882	0	0.00392402	0	0.00378055	0	0.00127143	Species	0.0399366	0.125082
Clostridiales species incertae sedis [meta_mOTU_v25_12674]	0.000690969	0.000822246	0.00188733	0.00123928	0.00459916	0.00162194	0.00110042	0.000767491	0.000931007	0.00359721	0.00456129	0.00367594	0.0078787	0.00467848	0.0160794	0.00852097	0.0100004	0.0053501	Species	0.00104031	0.0101682
Clostridiales species incertae sedis [meta_mOTU_v25_12690]	0	0	0.000321473	0.00046613	0.0225861	0.000661419	0.00190108	0.00299448	0.000896007	0	0	0	0	0	0	0	0	0	Species	0.191641	0.295281
Clostridiales species incertae sedis [meta_mOTU_v25_12691]	0.000176356	0.00102772	0.000699303	0.00097117	0.000800987	0.000665939	0.00172146	0.00117578	0.00110823	0.0464404	0.0350197	0.024997	0.00912509	0.0318379	0.00891089	0.0309372	0.0164155	0.0124967	Species	7.43283e-05	0.00180172
Clostridiales species incertae sedis [meta_mOTU_v25_12706]	0	0	0.000309104	0	0	0	0	0	0.000347194	0	0	0	0	0	0	0	0	0	Species	0.150895	0.281014
Clostridiales species incertae sedis [meta_mOTU_v25_12725]	0.000157609	0	0	0	0.00140534	0.00336108	0.00211913	0.00090705	0.00156071	0	0	0	0	0	0	0	0	0	Species	0.0156354	0.0751988
Clostridiales species incertae sedis [meta_mOTU_v25_12747]	0	0	0	0.00594004	0.0425383	0.000854817	0	0.00344145	0.000315371	0	0	0	0	0	0	0	0.0112283	0	Species	0.346599	0.411841
Clostridiales species incertae sedis [meta_mOTU_v25_12751]	0	0.000168068	0.000471187	0.000622793	0	0	0	0.00054465	0.000216707	0	0	0	0	0	0	0	0	0	Species	0.0182602	0.081968
Clostridiales species incertae sedis [meta_mOTU_v25_12755]	0	0	0.00205697	0	0	0	0	0	0	0	0.00389972	0.00195106	0.00100196	0	0	0	0.00508436	0	Species	0.128645	0.25965
Clostridiales species incertae sedis [meta_mOTU_v25_12763]	0	0.000129852	0	0.000323723	0.000205677	0.000317768	0.000738714	0	0	0.0111291	0.00258174	0.00289062	0	0.00175751	0	0.00330514	0.00747925	0.00146858	Species	0.0182162	0.081968
Clostridiales species incertae sedis [meta_mOTU_v25_12774]	0	0.000279564	0	0.000725271	0	0	0.000505953	0	0	0.00336166	0.00670733	0.00608633	0.0046127	0.0127025	0.00542927	0.00595279	0.00283421	0.00261488	Species	7.12479e-05	0.00179901
Clostridiales species incertae sedis [meta_mOTU_v25_12776]	0	0	0.00022628	0	0	0	0	0	0	0	0	0	0	0	0	0.013159	0	0	Species	0.340402	0.406478
Clostridiales species incertae sedis [meta_mOTU_v25_12804]	0	0.000426233	0	0	0	0	0.000450509	0	0	0.00251334	0.00271865	0.00243625	0.00168035	0.00391225	0	0	0	0.00423594	Species	0.00414716	0.0276174
Clostridiales species incertae sedis [meta_mOTU_v25_12809]	0.00084189	0.000502393	0.000505426	0.001821	0.00204993	0.000914474	0.00308542	0.00360918	0.00154657	0.00593054	0.00820659	0.00358978	0.00727006	0.00328842	0.00433259	0.00732188	0.00969053	0.00338388	Species	0.000169313	0.00274019
Clostridiales species incertae sedis [meta_mOTU_v25_12832]	0.000242938	0.000460873	0.00161295	0.00149451	0.000403157	0.000937011	0.000883262	0.000402925	0.000966884	0	0.00552103	0.00117748	0	0	0	0.00415388	0	0	Species	0.605056	0.647816
Clostridiales species incertae sedis [meta_mOTU_v25_12851]	0	0.000388578	0	0	0	0.00212119	0	0	0.000698033	0	0	0	0	0	0	0	0	0	Species	0.14972	0.281014
Clostridiales species incertae sedis [meta_mOTU_v25_12855]	0.00381424	0.000782851	0.000255591	0.000224711	0	0.0003887	0.000916426	0.000189947	0.000491375	0.00581594	0.00217677	0.00407852	0.00547461	0.00709037	0.00462548	0.00425068	0.00225608	0.0013027	Species	0.000384136	0.00484972
Clostridiales species incertae sedis [meta_mOTU_v25_12867]	0	0.000222621	0	0.00247768	0	0.00127469	0	0.00366276	0	0	0	0	0	0	0	0	0	0	Species	0.0791468	0.191087
Clostridiales species incertae sedis [meta_mOTU_v25_12978]	0	0.000592457	0	0	0	0	0	0	0	0.00627824	0.00356971	0.0347621	0.00265732	0.00784396	0.00291935	0.0141228	0.00271649	0.00311753	Species	0.025576	0.0945063
Clostridiales species incertae sedis [meta_mOTU_v25_13031]	0.00020328	0.000505811	0.000656167	0.000643037	0.00101942	0.000619815	0.000570142	0	0.000570439	0.00339325	0.00878249	0.00231167	0.00931026	0.00235209	0.00425443	0.00232982	0.00561693	0.00156932	Species	0.000956204	0.00949934
Clostridiales species incertae sedis [meta_mOTU_v25_13100]	0	0.000647731	0.000278769	0.000381173	0.000734264	0	0	0.000523014	0	0.00448919	0.028182	0.0166628	0.00218902	0.0163747	0.00159981	0.0225877	0	0.0373602	Species	0.00578068	0.0368747
Clostridiales species incertae sedis [meta_mOTU_v25_13147]	0	0	0.000381216	0.000400533	0	0.000806842	0.000470929	0	0.000584068	0.00236511	0.0056486	0.0042803	0	0.00507015	0	0.000787799	0	0	Species	0.04726	0.14178
Clostridiales species incertae sedis [meta_mOTU_v25_13159]	0.000172425	0.000963427	0.00154499	0.00110964	0.000402717	0.000678744	0.00140811	0.000918708	0.00118499	0.0293977	0.0143542	0.0131777	0.00571341	0.0122209	0.00464631	0.0194381	0.0140588	0.0125224	Species	6.86844e-05	0.00179901
Clostridiales species incertae sedis [meta_mOTU_v25_13165]	0.000611246	0.000710639	0.00125275	0.00151365	0.00128996	0.00133439	0.00168326	0.000520642	0.000493342	0.00399049	0.00864874	0.00619997	0.00949394	0.00463971	0.00990597	0.00459658	0	0.00153458	Species	0.00161968	0.0144342
Clostridiales species incertae sedis [meta_mOTU_v25_13168]	9.78174e-05	0.000245668	0.000442063	0.000835582	0.00082601	0	0.000986832	0.000166775	0.000491935	0	0	0	0	0	0	0	0	0	Species	0.00155613	0.0142023
Clostridiales species incertae sedis [meta_mOTU_v25_13173]	0	0	0	0	0	0	0	0	0	0	0.00457171	0.00196065	0	0	0	0	0	0	Species	0.187466	0.294312
Clostridiales species incertae sedis [meta_mOTU_v25_13176]	0	0.000792876	0.000938148	0.00210678	0.00132294	0	0	0	0	0	0	0	0	0	0	0	0	0	Species	0.0400075	0.125082
Clostridiales species incertae sedis [meta_mOTU_v25_13187]	0	0	0	0	0	0	0	0	0	0.00876872	0.0058204	0.0066534	0.00456254	0.0046575	0	0.00396105	0.00782028	0.00124445	Species	0.000117272	0.00229162
Clostridiales species incertae sedis [meta_mOTU_v25_13242]	0.000300772	0.000172919	0.000254432	0.000320478	0	0.000722737	0.000260906	0.00045642	0.000415633	0.00525003	0.00550206	0.00777684	0.00181674	0.00585744	0.00232256	0.00511293	0.00629876	0.00371641	Species	2.65127e-06	0.000162434
Clostridiales species incertae sedis [meta_mOTU_v25_13280]	0.000148265	0.00250692	0	0.00106866	0.000645614	0.000347831	0.000267139	0.000226762	0.000251414	0	0	0.00545678	0	0	0.00515513	0	0	0	Species	0.496595	0.550158
Clostridiales species incertae sedis [meta_mOTU_v25_13302]	0.000189394	0	0	0.000469284	0.000451226	0	0.000276595	0	0.000606789	0	0	0	0	0	0	0	0	0	Species	0.0138852	0.0691799
Clostridiales species incertae sedis [meta_mOTU_v25_13304]	0.000452312	0.00030473	0.00133868	0.00144927	0.00117753	0.00106502	0.000762606	0.000362034	0.00111643	0	0.0017526	0.00188035	0.00335926	0.00190258	0.0148091	0.00213481	0.00893185	0.00206531	Species	0.0600638	0.161772
Clostridiales species incertae sedis [meta_mOTU_v25_13308]	0.000534255	0	0.000326176	0.00172554	0.000463154	0.00334111	0.000554504	0.00133207	0.000313644	0	0	0.0174091	0	0	0	0	0	0	Species	0.624886	0.667868
Clostridiales species incertae sedis [meta_mOTU_v25_13332]	0	0	0	0.000732383	0.000718997	0	0.000304576	0	0.000304133	0	0.00763439	0	0	0	0	0	0	0	Species	0.479035	0.533631
Clostridiales species incertae sedis [meta_mOTU_v25_13370]	0	0.00519876	0.000831145	0	0	0.000230419	0.000497523	0	0.000673579	0	0	0	0	0	0	0	0	0	Species	0.157637	0.285158
Clostridiales species incertae sedis [meta_mOTU_v25_13385]	0.000548554	0.000225786	0	0	0	0.00577621	0.00293036	0	0.000869731	0	0	0	0	0	0	0	0	0	Species	0.0995665	0.217041
Clostridiales species incertae sedis [meta_mOTU_v25_13390]	0.000484531	0.000410604	0.000605817	0.000553186	0.000643915	0.00106794	0.000574059	0.00090674	0.000326518	0.00360707	0.00386576	0.00150155	0.00219502	0	0.00590116	0.000996952	0.0037382	0.00149675	Species	0.00549522	0.0354266
Clostridiales species incertae sedis [meta_mOTU_v25_13415]	0	0.000246222	0	0.000597036	0	0	0	0	0	0	0	0	0	0	0	0	0	0	Species	0.190416	0.295207
Clostridiales species incertae sedis [meta_mOTU_v25_13486]	0	0.000849137	0	0.00100391	0	0.000377096	0.000722748	0.000744055	0.000571584	0.00752474	0	0.00401519	0.00527868	0	0.00452811	0	0.00637243	0	Species	0.0232069	0.0913208
Clostridiales species incertae sedis [meta_mOTU_v25_13541]	0	0.00051875	0	0.00104848	0	0	0	0	0	0	0	0.00197852	0	0	0	0	0	0	Species	0.858418	0.871359
Clostridiales species incertae sedis [meta_mOTU_v25_13580]	0	0	0	0	0	0	0	0	0	0	0	0	0.00169742	0	0	0	0	0.00312178	Species	0.170968	0.28814
Clostridiales species incertae sedis [meta_mOTU_v25_13774]	0	0.000836484	0.00070509	0.0284476	0.00710176	0	0.000548215	0.00241091	0	0	0	0	0	0	0.00183789	0	0	0	Species	0.189686	0.295207
Clostridiales species incertae sedis [meta_mOTU_v25_13780]	0	0	0	0	0	0	0	0.000352638	0	0.00350674	0	0.00741247	0	0.00544711	0	0	0	0.00464811	Species	0.0328542	0.108205
Clostridiales species incertae sedis [meta_mOTU_v25_13784]	0.000183458	0.000385161	0.000638397	0.000927371	0.000350445	0.000808706	0.00366644	0.000293871	0.00418155	0.0053597	0.00912166	0.0209535	0.00449179	0.0200283	0.00208147	0.00948034	0.0097474	0.00398566	Species	0.00277983	0.0220568
Clostridiales species incertae sedis [meta_mOTU_v25_13792]	0	0	0	0	0	0	0	0.000127234	0	0	0	0	0.0108845	0	0	0	0	0.00338836	Species	0.216301	0.312836
Clostridiales species incertae sedis [meta_mOTU_v25_13794]	0.00392711	0.000193145	0.000248018	0	0	0.000434072	0	0	0	0	0	0	0	0	0	0	0	0	Species	0.22973	0.317281
Clostridiales species incertae sedis [meta_mOTU_v25_13863]	0.000205644	0	0.000463655	0	0	0.000668937	0.000271881	0.000165268	0	0	0	0	0	0	0	0	0	0	Species	0.0246736	0.0931707
Clostridiales species incertae sedis [meta_mOTU_v25_13922]	0	0.000459922	0.0015878	0	0	0	0.000276595	0.000647176	0	0	0	0	0	0	0	0	0	0	Species	0.0800422	0.191722
Clostridiales species incertae sedis [meta_mOTU_v25_13955]	0	0.00122374	0	0.00177307	0	0.00599225	0	0	0	0	0	0.0047474	0	0.00301997	0	0.00208708	0	0.00530216	Species	0.497544	0.550204
Clostridiales species incertae sedis [meta_mOTU_v25_13970]	0.000775217	0	0	0.000895051	0	0.000659026	0.000286745	0	0.00153015	0.0150055	0	0.00509406	0.0073503	0.0078547	0.00855919	0.00447754	0	0.00547681	Species	0.00247788	0.0200212
Clostridiales species incertae sedis [meta_mOTU_v25_13976]	0.000624594	0.000413589	0.00115675	0.00267476	0.000923515	0.00169801	0.00192528	0.000527069	0.00148706	0.00403333	0.0069504	0.00529606	0.0106805	0.00317489	0.00786705	0.00251307	0.0106001	0.00638962	Species	0.000128573	0.00229162
Clostridiales species incertae sedis [meta_mOTU_v25_13977]	0	0	0	0	0	0	0	0	0	0.00131985	0	0.00418875	0	0	0	0	0	0.00109534	Species	0.134983	0.269602
Clostridiales species incertae sedis [meta_mOTU_v25_14118]	0.000401484	0	0.000451515	0.00273745	0.00140494	0.000435041	0.00081667	0.000495408	0.000729087	0.00325886	0.00402888	0.00588256	0	0.00953468	0.0019166	0.0051299	0.00962024	0.00387636	Species	0.00235619	0.0193443
Clostridiales species incertae sedis [meta_mOTU_v25_14213]	0	0	0.0012765	0.00075321	0.00087097	0.000532509	0.000280946	0.000340397	0	0	0	0	0	0	0	0	0	0	Species	0.00821243	0.0473975
Clostridiales species incertae sedis [meta_mOTU_v25_14305]	0.000263546	0	0	0	0	0.00584121	0.000212591	0.000223029	0.000476715	0	0	0	0	0	0	0	0	0	Species	0.237328	0.322047
Clostridiales species incertae sedis [meta_mOTU_v25_14320]	0	0	0	0	0	0	0	0	0	0	0	0	0.00301063	0.00782785	0.0113535	0.016869	0	0	Species	0.0542316	0.155007
Clostridiales species incertae sedis [meta_mOTU_v25_14325]	0	0	0	0	0	0	0.000793196	0	0	0.00812289	0.0127355	0.00275198	0.00179365	0	0.00511783	0	0	0.00253654	Species	0.0247533	0.0931707
Clostridiales species incertae sedis [meta_mOTU_v25_14342]	0.000322923	0.00069585	0.000248292	0.000657425	0.00127	0.000588144	0.000330958	0	0.00099714	0.0028469	0.008454	0.00641881	0	0.00391782	0.00514906	0.0025817	0.00509199	0.00434287	Species	0.000306174	0.00403351
Clostridiales species incertae sedis [meta_mOTU_v25_14346]	0	0.000399658	0.000776502	0.000211893	0	0.000195586	0.000308313	0.000223291	0.000567953	0.00152026	0	0.000773214	0.00172491	0	0.000804702	0	0	0.0015974	Species	0.135246	0.269602
Clostridiales species incertae sedis [meta_mOTU_v25_14500]	0	0	0.000713165	0.0010999	0	0.000382746	0	0.000245848	0	0	0	0	0	0.00215865	0.00296862	0	0	0.00137742	Species	0.283826	0.360242
Clostridiales species incertae sedis [meta_mOTU_v25_14503]	0	0	0.000508288	0.00124194	0.000409414	0.00108724	0.000283173	0	0.000629748	0.00263947	0.00309556	0.00380915	0.00217811	0.00710508	0.00350762	0.00185326	0.0111066	0.00363401	Species	0.00136916	0.0129643
Clostridiales species incertae sedis [meta_mOTU_v25_14522]	0	0	0.000231828	0.000388602	0	0	0.000286844	0	0	0.00242061	0	0.00430043	0.00377507	0.00318598	0.00208147	0	0.00518068	0.00359806	Species	0.000487902	0.00547534
Clostridioides difficile [ref_mOTU_v25_00721]	0	0.00183059	0	0.00163444	0	0.00215333	0	0	0.000169586	0	0	0.00330036	0	0.0132248	0.006811	0.0063203	0	0	Species	0.114167	0.240227
Clostridium butyricum [ref_mOTU_v25_03807]	0	0.000164016	0	0	0	0	0.000734146	0	0	0	0	0	0	0	0	0	0	0	Species	0.237549	0.322047
Clostridium celatum [ref_mOTU_v25_04337]	0	0	0	0.000558111	0.000226005	0	0	0	0	0	0	0	0	0	0	0	0	0	Species	0.191807	0.295281
Clostridium phoceensis [ref_mOTU_v25_08865]	0.000353708	0.00063019	0	0.000194703	0	0.000779593	0.000571525	0.000128494	0.000342403	0.0011285	0.00178786	0.00139275	0.00815304	0.000886296	0.00737434	0.000531708	0.00112804	0.000793454	Species	0.0385272	0.122882
Clostridium saudiense/disporicum [ref_mOTU_v25_04336]	0	0	0	0.000308333	7.53348e-05	0	0	0	0	0	0	0	0	0	0	0	0	0	Species	0.23099	0.317415
Clostridium sp. [ref_mOTU_v25_03343]	0	0	0	0	0	0	0	0	0	0	0.00121908	0	0	0	0	0.000543829	0	0	Species	0.184547	0.292826
Clostridium sp. [ref_mOTU_v25_03607]	0.000224527	0	0.000222079	0	0.000747291	0.00160984	0	0.000440548	0	0.000774441	0	0	0.00208896	0	0	0	0	0	Species	0.888258	0.895647
Clostridium sp. [ref_mOTU_v25_03608]	0.000282815	0	0.000111372	0.000154674	0.00302669	0.00320446	0.00350408	0.00152317	0.00894792	0	0	0	0	0	0	0	0	0	Species	0.0287817	0.101405
Clostridium sp. [ref_mOTU_v25_03613]	0	0.000290296	0	0	0	0.000222741	0	0	0	0	0	0	0	0	0	0	0	0	Species	0.154303	0.2825
Clostridium sp. [ref_mOTU_v25_03619]	0	0	0	0.00089139	0.00133801	0.00201272	0.000629896	0.000248738	0.000200367	0	0	0	0	0	0	0	0	0	Species	0.0231105	0.0913208
Clostridium sp. [ref_mOTU_v25_03622]	3.33435e-05	4.20555e-05	0	0.000106382	6.96251e-05	0.000206517	0.000392806	0	0.000336789	0	0	0	0.00060421	0	0.0009595	0	0	0	Species	0.748964	0.778118
Clostridium sp. [ref_mOTU_v25_03675]	0.000109034	0.000761825	0	0	0.00018973	0.000200265	0	0	0	0	0	0	0	0	0.00254601	0	0.00126414	0	Species	0.375759	0.436225
Clostridium sp. [ref_mOTU_v25_03680]	0.000385524	0.000131523	0.00282267	0	0	0	0	0	0	0	0	0	0	0	0	0	0	0	Species	0.247906	0.328733
Clostridium sp. 26_22 [ref_mOTU_v25_10411]	0	0	0	0	0.000413748	0.000162661	0	0	0	0	0	0.000502762	0	0	0	0	0	0.000408305	Species	0.657569	0.697875
Clostridium sp. CAG:1000 [ref_mOTU_v25_07606]	0	0	0	0	0	0	0	0	0	0	0.00349257	0	0.00186322	0	0.000900356	0.000580328	0	0	Species	0.0769428	0.188779
Clostridium sp. CAG:127 [meta_mOTU_v25_12306]	0.000463782	0	0	0	0	0.0110945	0.000341587	0.000912553	0.00139209	0	0	0	0	0	0	0	0	0	Species	0.207161	0.308628
Clostridium sp. CAG:253 [ref_mOTU_v25_03600]	0.000100485	0.000248684	6.18775e-05	0	0	0.00530663	0.000589774	0	0.000254639	0	0	0	0	0	0.000854014	0	0	0	Species	0.293152	0.368753
Clostridium sp. CAG:302 [meta_mOTU_v25_12499]	0	0	0	0	0	0	0	0	0	0.00122815	0.00177628	0	0.00129463	0	0	0	0	0	Species	0.0679279	0.171518
Clostridium sp. CAG:343 [meta_mOTU_v25_12430]	0.000828355	0.0061069	0	0	0	0	0	0	0	0	0	0	0.00583378	0	0	0	0	0	Species	0.897445	0.90191
Clostridium sp. CAG:389 [ref_mOTU_v25_03615]	0	0.000333926	0.000154127	0.000516712	0.00045989	0.000553688	0	8.49436e-05	0	0.00925362	0	0	0	0	0	0	0	0	Species	0.452229	0.505629
Clostridium sp. CAG:413 [ref_mOTU_v25_07624]	0	0.0010557	0	0	0	0	0	0.000597208	0.00015838	0	0.00276619	0	0.000892186	0	0.00258677	0	0	0	Species	0.243888	0.324816
Clostridium sp. CAG:433 [meta_mOTU_v25_12886]	0.000226859	0	0	0	0	0.00861828	0.000282551	0	0.000338179	0	0	0	0	0	0	0	0	0	Species	0.283121	0.360242
Clostridium sp. CAG:440 [meta_mOTU_v25_12406]	0	0.000247298	0	0	0.000857583	0.000267717	0.00055319	0	0.000279435	0	0.00237619	0	0	0	0	0	0	0.00352235	Species	0.380383	0.437559
Clostridium sp. CAG:440 [ref_mOTU_v25_07628]	0	0.00020025	0	0	0	0.000399381	0.000383425	0	0.000279435	0	0.00237619	0	0	0	0	0	0	0	Species	0.653435	0.694704
Clostridium sp. CAG:452 [meta_mOTU_v25_12543]	0.000289924	0.00285977	0	0	0.000637027	0.00402351	0.00142474	0.000190603	0.000764942	0.0108708	0.00652639	0.0121981	0.00768923	0.012196	0.00130218	0.0127246	0	0.0115934	Species	0.000577716	0.00625171
Clostridium sp. CAG:465 [ref_mOTU_v25_07632]	0	0	0	0.00174555	0.000214206	0	0	0	0.000466913	0	0	0	0	0	0	0	0	0	Species	0.179517	0.288561
Clostridium sp. CAG:492 [meta_mOTU_v25_12462]	0.000114647	0	0	0.00142335	0.00661009	0.00444727	0.00159519	0.000221033	0	0	0.0352847	0	0	0	0	0.00215352	0	0	Species	0.529151	0.577776
Clostridium sp. CAG:508 [ref_mOTU_v25_03616]	0	0	0	0	0	0	0	0	0	0	0.00435115	0	0	0.00158888	0	0	0	0	Species	0.199816	0.302722
Clostridium sp. CAG:510 [ref_mOTU_v25_07634]	0	0	0	0	0	0.000121055	0.000341587	0	0.0104585	0	0.00168932	0.00605351	0	0	0	0	0.00122574	0.000307262	Species	0.892569	0.8985
Clostridium sp. CAG:524 [meta_mOTU_v25_12495]	0	0	0	0	0	0	0.000507469	0	0.000321527	0.00647394	0	0.00565034	0	0	0.00213146	0	0	0.00276356	Species	0.0544828	0.155007
Clostridium sp. CAG:533 [meta_mOTU_v25_12421]	0	0.110695	0.0477415	0.000585188	0	0.0201156	0.0405827	0	0.0376464	0	0	0	0	0	0	0	0	0	Species	0.0318011	0.106472
Clostridium sp. CAG:567 [ref_mOTU_v25_03617]	0	0.000123103	0	0	0	0	0	0	0	0.00200659	0.00600445	0.00234686	0.00373512	0	0	0	0.000667748	0.00127346	Species	0.0189806	0.0825711
Clostridium sp. CAG:571 [ref_mOTU_v25_07639]	0	0	0	0	0.000276416	0	0	0	0	0.000503407	0	0	0	0	0	0.00122702	0	0	Species	0.278639	0.358503
Clostridium sp. CAG:590 [ref_mOTU_v25_07641]	0	0	0	0	0	0.00137582	0	0	0	0	0	0.00038178	0	0	0	0	0	0	Species	0.496293	0.550158
Clostridium sp. CAG:609 [ref_mOTU_v25_07643]	0	0.00026555	0	0	0	0	0	0	0	0	0.00774741	0	0	0	0	0.00111798	0	0	Species	0.280104	0.359625
Clostridium sp. CAG:632 [ref_mOTU_v25_07645]	0	0.000118903	0	0	0	0.00152605	0	0	0	0	0	0	0	0	0	0	0	0	Species	0.293907	0.368753
Clostridium sp. CAG:710 [ref_mOTU_v25_07648]	0	0.125288	0	0	0	0	7.33692e-05	0	0	0	0	0	0	0	0	0	0	0	Species	0.331886	0.400643
Clostridium sp. CAG:793 [ref_mOTU_v25_07652]	0	0	0.000561725	0	0.000266829	0	0	0	0.000217893	0.000951286	0.00289365	0	0	0	0	0	0	0	Species	0.363251	0.428242
Clostridium sp. CAG:914 [ref_mOTU_v25_07654]	0	0	0	0	0	0	0	0	0	0	0.00940395	0	0.00351177	0	0	0.00111869	0	0.000342088	Species	0.147194	0.281014
Clostridium species incertae sedis [meta_mOTU_v25_12234]	0.000485862	0.0002895	0.000140431	0.000444615	0.000802807	0.00225745	0.000223948	0.000432137	0.000400285	0.00150295	0	0	0.0024132	0	0	0	0	0	Species	0.643287	0.685118
Clostridium species incertae sedis [meta_mOTU_v25_12249]	0	0.000197069	0.000374591	0	0	0.000550359	0	0	0	0.00159973	0.00758488	0.010399	0	0.00264861	0	0.0157862	0	0.00138371	Species	0.0378506	0.121362
Clostridium species incertae sedis [meta_mOTU_v25_12348]	0.000178977	0.0018759	0	0.00107668	0.000510867	0.000588816	0.000433517	0.000217595	0	0	0	0	0.00111475	0	0	0	0	0	Species	0.0950897	0.213265
Clostridium species incertae sedis [meta_mOTU_v25_12350]	0.00026796	0	0	0.000427268	0.000817016	0.000377954	0	0	0	0	0	0	0	0.00347783	0	0	0	0	Species	0.663731	0.703183
Clostridium species incertae sedis [meta_mOTU_v25_12417]	0	0.000906881	0	0.00027141	0	0.000222875	0.000292105	0.000397991	0.000280953	0	0	0	0	0	0	0	0	0	Species	0.0131412	0.0677586
Clostridium species incertae sedis [meta_mOTU_v25_12575]	0.000441051	0	0.00091971	0.0010437	0.0408823	0	0	0	0	0	0	0	0	0	0	0	0	0	Species	0.302183	0.377573
Clostridium species incertae sedis [meta_mOTU_v25_12597]	0	0.000254057	0	0.000218167	0	0.000218313	0.000182354	0	0	0	0	0	0	0	0	0	0	0	Species	0.0236912	0.0925726
Clostridium species incertae sedis [meta_mOTU_v25_12640]	0.000232623	0	0	0	0	0.00114646	0.000425982	0	0	0	0	0	0	0	0	0	0	0	Species	0.137981	0.271586
Clostridium species incertae sedis [meta_mOTU_v25_12696]	0	0	0	0.000466874	0.000527559	0.000472106	0	0.000300734	0	0	0	0	0	0	0	0	0	0	Species	0.0261832	0.0955844
Clostridium species incertae sedis [meta_mOTU_v25_12739]	0.000873209	0	0	0	0.000929607	0	0.00141308	0	0	0	0	0	0	0	0	0	0	0.00285695	Species	0.914954	0.917984
Clostridium species incertae sedis [meta_mOTU_v25_12783]	0	0	0	0	0	0	0	0	0	0.00104597	0	0	0	0	0	0	0	0.00119647	Species	0.151173	0.281014
Clostridium species incertae sedis [meta_mOTU_v25_12802]	0	0	0.0009003	0	0	0.00122967	0.00317743	0	0.00367694	0	0.00559957	0	0	0	0	0.00192485	0	0	Species	0.841295	0.85829
Clostridium species incertae sedis [meta_mOTU_v25_12828]	0	0.000199436	0	0	0	0	0.000226406	0	0	0	0	0	0	0	0	0	0	0.00121403	Species	0.536091	0.5843
Clostridium species incertae sedis [meta_mOTU_v25_12839]	0	0	0	0	0.000487192	0.000487096	0	0	0	0	0	0	0	0	0	0	0	0	Species	0.150069	0.281014
Clostridium species incertae sedis [meta_mOTU_v25_12854]	0.00962663	0.000306694	0	0.00124559	0.00471322	0.0151599	0.000624325	0.000278594	0.000828432	0	0	0	0	0	0	0	0	0	Species	0.057497	0.159831
Clostridium species incertae sedis [meta_mOTU_v25_12977]	0	0.000589596	0	0.000536574	0.00357912	0.00107087	0.000489176	0	0	0.00434994	0	0	0.00220105	0	0.00425443	0	0.00446619	0	Species	0.230361	0.317281
Clostridium species incertae sedis [meta_mOTU_v25_13081]	0.000305619	0.000437077	0	0.000685055	0.000967696	0.000658916	0	0.000194948	0.00566454	0.00413024	0	0.00176337	0	0	0	0	0.00129751	0	Species	0.804215	0.826024
Clostridium species incertae sedis [meta_mOTU_v25_13125]	0.00048296	0	0	0	0.000247514	0.000543442	0	0	0	0	0	0	0.00348064	0	0	0	0	0	Species	0.542527	0.586115
Clostridium species incertae sedis [meta_mOTU_v25_13313]	0	0	0	0	0	0.000673548	0	0	0	0	0.00346588	0	0	0	0	0	0	0	Species	0.440588	0.4972
Clostridium species incertae sedis [meta_mOTU_v25_13375]	0.00134587	0	0	0	0	0	0	0	0	0	0	0	0.00217568	0	0	0	0	0	Species	0.74987	0.778118
Clostridium species incertae sedis [meta_mOTU_v25_13382]	0.00195947	0.000369309	0.0118152	0.0016036	0.00208875	0.00727057	0.000323699	0.0240471	0	0.0023765	0.020023	0	0.0021974	0	0	0.00147478	0.00501416	0.00192592	Species	0.59764	0.641008
Clostridium species incertae sedis [meta_mOTU_v25_13387]	0	0	0	0	0	0	0	0	0.00137481	0.00218661	0.00564719	0	0.0344427	0	0	0	0	0.00314001	Species	0.20883	0.310173
Clostridium species incertae sedis [meta_mOTU_v25_13428]	0	0.00337045	0	0.00142362	0.00199401	0.000934153	0.000343464	0	0.000250976	0	0	0	0	0	0	0	0	0	Species	0.0292898	0.101426
Clostridium species incertae sedis [meta_mOTU_v25_13459]	0.000398059	0.000645098	0.000432926	0	0.00042625	0	0	0	0.00131937	0	0	0	0	0	0	0	0	0	Species	0.0259288	0.0952292
Clostridium species incertae sedis [meta_mOTU_v25_13679]	0	0.000776601	0	0.000725231	0.000507268	0.0016063	0	0	0.000469817	0.00526278	0	0.00149157	0	0	0	0	0	0.00211336	Species	0.406589	0.464017
Clostridium species incertae sedis [meta_mOTU_v25_13850]	0	0.00016633	0	0	0	0.00076668	0.000758706	0.00168685	0.000328538	0.00155081	0.00290204	0.00584953	0	0	0	0	0	0.00230499	Species	0.177084	0.288349
Clostridium species incertae sedis [meta_mOTU_v25_13858]	0	0.000269102	0	0.000542478	0.0015641	0.00116712	0	0	0	0	0	0	0	0	0	0	0	0	Species	0.0624115	0.163023
Clostridium species incertae sedis [meta_mOTU_v25_13916]	0	0	0	0.00838354	0.0128155	0.00552167	0.00028367	0	0.00187306	0	0	0	0	0	0	0	0	0	Species	0.0568457	0.159484
Clostridium species incertae sedis [meta_mOTU_v25_14173]	0.000763546	0	0	0.000938971	0.000547888	0.00344953	0	0	0.000498453	0.00165145	0	0	0.00356515	0	0	0	0	0	Species	0.846242	0.861886
Clostridium species incertae sedis [meta_mOTU_v25_14279]	0	0	0	0.00098405	0.000387435	0.000535434	0	0.00129475	0.00039508	0	0	0	0	0	0	0.00349327	0	0.00136697	Species	0.747689	0.778118
Clostridium species incertae sedis [meta_mOTU_v25_14454]	0.000338219	0	0	0	0	0.000955474	0.000348649	0	0.000637734	0	0	0	0	0	0	0	0	0.00331786	Species	0.769359	0.794262
Collinsella aerofaciens [ref_mOTU_v25_03626]	0.00010552	0	0.000180269	0.000318692	0	0	0	0	0	0	0	0	0	0	0	0	0	0	Species	0.0971304	0.213265
Coprococcus comes [ref_mOTU_v25_03690]	0	0	0	0	0.00010432	0	0	0	0	0	0	0	0	0.000483707	0	0.00205533	0	0	Species	0.25328	0.333669
Coprococcus eutactus [ref_mOTU_v25_02378]	0	0	0	0	0	0.000471232	0	0.00762475	0	0	0	0	0	0	0	0	0	0	Species	0.301356	0.377318
Coraliomargarita sp. CAG:312 [meta_mOTU_v25_13526]	0	0.00382904	0.00525902	0	0	0	0.00274037	0	0.00290234	0	0	0	0	0	0	0	0	0	Species	0.0302788	0.101939
Coraliomargarita sp. CAG:312 [meta_mOTU_v25_13914]	0.00136166	0.000321416	0.000258209	0.000728581	0.00615765	0.00107881	0.000801208	0.000264967	0.00246272	0	0.00219201	0	0.00886947	0.135279	0.00313259	0.0302046	0	0	Species	0.229629	0.317281
Cutibacterium acnes [ref_mOTU_v25_00800]	0	0.000455943	0	0	0	0	0	0	0	0	0	0.000590391	0	0.000897444	0	0	0	0	Species	0.365861	0.428242
Dehalococcoidales species incertae sedis [meta_mOTU_v25_12246]	0	0	0.00117608	0.00136925	0.000425398	0.00124848	0	0	0.000343255	0.00853946	0	0	0.018084	0	0.0117319	0	0	0.000892945	Species	0.108479	0.231472
Dehalococcoidales species incertae sedis [meta_mOTU_v25_12342]	0	0	0.0108719	0	0	0	0	0	0	0.00465771	0	0	0	0	0	0.00147181	0	0	Species	0.694223	0.732925
Desulfovibrio piger [ref_mOTU_v25_06282]	0	0.00787702	0.000611469	0	0.000374294	0	0.00113586	0.00803532	0.0003404	0	0	0	0	0	0	0	0	0	Species	0.0881884	0.203978
Desulfovibrio species incertae sedis [meta_mOTU_v25_12490]	0	0	0	0	0	0	0.000556687	0	0.000898791	0	0	0	0	0	0	0	0	0	Species	0.163412	0.287134
Dorea longicatena [ref_mOTU_v25_03692]	0	0.000389062	0	0.000212044	0	0	0	0	0.00210585	0	0.00116419	0	0	0.000995537	0	0	0	0	Species	0.830834	0.849048
Dorea longicatena [ref_mOTU_v25_03693]	0	0	0	0.000424089	0.0105743	0	0	0.000879205	0.000663931	0	0	0	0	0	0	0	0	0	Species	0.244416	0.324816
Eggerthella lenta [ref_mOTU_v25_00719]	0	0	6.27542e-05	0.000105192	0.000214704	0	6.99223e-05	0	0.00016086	0	0.00116419	0	0	0	0	0	0	0.000635247	Species	0.366762	0.428242
Eggerthellaceae species incertae sedis [meta_mOTU_v25_13204]	0	0	0	0	0	0	0	0	0	0.00269706	0	0.000979592	0.00269154	0	0.00090881	0	0.00185974	0.0015911	Species	0.00471051	0.0310279
Elusimicrobium sp. An273 [meta_mOTU_v25_13352]	0	0	0.000417651	0	0	0	0	0.000253882	0	0	0	0	0	0	0	0	0	0	Species	0.164415	0.287134
Enterobacterales sp. [ref_mOTU_v25_00085]	5.13513e-05	0.000171056	0	0	0	0	0	0	0	0	0	0	0	0	0	0	0	0	Species	0.21521	0.312836
Eubacterium ramulus [ref_mOTU_v25_03570]	0	0	0	0	0	0	0	0.000181692	8.92116e-05	0	0	0	0	0	0	0	0	0	Species	0.177707	0.288349
Eubacterium sp. CAG:202 [meta_mOTU_v25_12308]	0	0	0	0.0004898	0	0.00101509	0	0	0.000528804	0	0	0	0	0	0	0	0	0	Species	0.0849828	0.200387
Eubacterium sp. CAG:38 [ref_mOTU_v25_07679]	0	0	0	0	0	0	0	0	0	0.00194217	0	0.000797979	0	0	0	0	0.00609141	0	Species	0.165608	0.287559
Eubacterium species incertae sedis [meta_mOTU_v25_12260]	0	0	0	0	0	0	0	0	0	0	0	0	0	0	0.00179421	0	0	0.000977119	Species	0.170869	0.28814
Eubacterium species incertae sedis [meta_mOTU_v25_12474]	0	0.000656066	0	0.000268716	0	0	0.000367709	0.00026462	0.000178645	0	0	0	0	0	0	0	0	0	Species	0.0204947	0.084122
Eubacterium ventriosum [ref_mOTU_v25_11151]	0	0.000138548	0.000139385	0.00223529	0.0010798	0.000694061	0	0	0.00163457	0	0	0	0	0	0	0	0.0022793	0.00576627	Species	0.745315	0.777385
Faecalibacterium prausnitzii [ref_mOTU_v25_06108]	8.49006e-05	0.000402979	0.000132005	0.000737692	0.000525895	0.000672199	0.000276595	0.000109806	0.00031524	0.0021573	0.00568781	0	0.00321417	0	0.00383953	0.00472821	0.00278586	0.00305275	Species	0.00148441	0.0138393
Faecalibacterium prausnitzii [ref_mOTU_v25_06109]	0.000620883	0.000864174	0.000572472	0.00070243	0.000384679	0.00149621	0.000691761	0.000748555	0.00073372	0.00166532	0.00235577	0.00188797	0.0137492	0.00139546	0.0501837	0.00121644	0.00324311	0	Species	0.175357	0.288349
Faecalibacterium prausnitzii [ref_mOTU_v25_06110]	0.000284636	0.000485814	0	0.000332042	0.000204707	0.000418236	0.000683563	0.000109806	0.000404749	0	0.00226772	0	0.00388166	0.0012112	0.0167699	0.0019719	0.00620328	0	Species	0.0862591	0.20105
Faecalibacterium prausnitzii [ref_mOTU_v25_06112]	0.000283723	0.000165969	0.000506567	0.00247163	0.00124627	0.000584964	0.000282214	0.000604201	0.000428003	0.0016551	0	0	0.00262757	0.0014546	0.00899481	0	0	0	Species	0.380518	0.437559
Faecalibacterium sp. [ref_mOTU_v25_03636]	0.000295742	0.000569037	0.00037402	0.000626952	0.000526056	0.00286007	0.000409905	0.000321133	0.000632907	0.00180353	0.00331557	0.00842702	0.00929416	0.0023831	0.00507742	0.00252808	0.00254259	0.00155645	Species	0.00392926	0.0273693
Faecalibacterium species incertae sedis [meta_mOTU_v25_12303]	0	0.000751912	0.000185462	0.000310882	0.000314346	0.000584936	0.000406984	0.00031286	0.000457991	0.00154021	0.00443011	0.00275701	0.00360893	0.0020451	0.0109926	0	0.00347034	0	Species	0.0205446	0.084122
Faecalibacterium species incertae sedis [meta_mOTU_v25_12325]	0	0.000772127	0.000545917	0.00182258	0	0.00162639	0.00103567	0.000176109	0.000778273	0	0.0207339	0	0.00255969	0	0.00593054	0.00142872	0	0	Species	0.26035	0.340026
Faecalibacterium species incertae sedis [meta_mOTU_v25_12331]	0.000151821	0	0	0	0	0	0.000142844	0.000218156	0	0.00339589	0.00246872	0	0.00266469	0	0.00619891	0	0	0	Species	0.0478328	0.142792
Faecalibacterium species incertae sedis [meta_mOTU_v25_12376]	7.59794e-05	0	0	0	0	0	0.000329871	0	0	0	0	0	0	0	0.00871966	0	0.002546	0	Species	0.233934	0.320009
Faecalibacterium species incertae sedis [meta_mOTU_v25_12403]	0	0.000609888	0	0	0	0.00033709	0.000354768	0	0	0	0	0	0.00226216	0	0.0100444	0	0.00356827	0	Species	0.169419	0.28814
Firmicutes bacterium [ref_mOTU_v25_03677]	0	0.000173713	0	0	0	0	0	0	0.00015757	0	0	0	0	0	0	0	0	0	Species	0.150651	0.281014
Firmicutes bacterium ADurb.Bin467 [meta_mOTU_v25_12694]	0	0	0.000250457	0.000523472	0.000744539	0	0	0	0	0.0026817	0.00234629	0	0	0	0	0	0	0	Species	0.322892	0.396791
Firmicutes bacterium ASF500 [ref_mOTU_v25_08057]	0	0.000978344	0.000328084	0.000518136	0	0	0	0.000198147	0.000618579	0	0	0.00274194	0	0.00173982	0.00472043	0	0.00309405	0	Species	0.0965394	0.213265
Firmicutes bacterium CAG:102 [ref_mOTU_v25_07726]	0.000151071	0.000505821	0	0.000274174	0	0.000309931	0.000315296	0.000282354	0.000618534	0.000408876	0	0	0	0	0.000677435	0	0	0	Species	0.176587	0.288349
Firmicutes bacterium CAG:114 [ref_mOTU_v25_07728]	0	0	6.30383e-05	0	0	0	0.0001754	0	0	0	0	0	0	0	0	0	0	0	Species	0.201063	0.303094
Firmicutes bacterium CAG:170 [ref_mOTU_v25_07733]	0	0	0.000254433	0	0	0	0.000141427	0	0	0.0179534	0.024681	0.012968	0.00810669	0.00922809	0.000623435	0.0222892	0.0197606	0.0051679	Species	0.000171827	0.00274019
Firmicutes bacterium CAG:227 [ref_mOTU_v25_07734]	3.66157e-05	0	0	0	0	0.000686261	0	0.00016966	0	0.000372758	0	0	0	0	0	0	0	0	Species	0.512839	0.56403
Firmicutes bacterium CAG:238 [ref_mOTU_v25_07735]	0	0	0	0.000164409	0.00023446	0	0	0	0	0	0	0	0	0	0	0	0	0	Species	0.157571	0.285158
Firmicutes bacterium CAG:313 [ref_mOTU_v25_07737]	0	0	0	0	0	0	0	0	0	0	0.0144784	0.00486951	0	0	0	0	0	0.0396099	Species	0.159048	0.28589
Firmicutes bacterium CAG:449 [ref_mOTU_v25_07740]	0	0	0	0	0.000429409	0	0	0.000113381	0	0	0	0	0.00186322	0	0	0	0	0	Species	0.499766	0.551655
Firmicutes bacterium CAG:460 [ref_mOTU_v25_07741]	0	0.000140291	0	0	0	0	0.000235889	0	0	0	0	0	0	0	0	0.000561805	0	0.000343593	Species	0.442925	0.497983
Firmicutes bacterium CAG:534 [ref_mOTU_v25_07743]	0.000102714	0.000129551	0.000521333	0	0.00107239	0.000905549	0	0.0014724	0.000167044	0.00704252	0	0.000765377	0.00279188	0	0.00809468	0	0.00649425	0	Species	0.064262	0.165714
Firmicutes bacterium CAG:555 [ref_mOTU_v25_07745]	0	0	0	0	0	0	0	0	0	0.0135123	0	0.00694297	0.00183758	0.0224425	0	0.0202271	0.00124964	0.000563208	Species	0.0255049	0.0945063
Firmicutes bacterium CAG:646 [ref_mOTU_v25_07723]	0	0	0.000130775	0	0	0	7.69426e-05	0	0	0	0	0	0	0	0	0	0	0.000336221	Species	0.7297	0.762411
Firmicutes bacterium CAG:884 [ref_mOTU_v25_07720]	0	0.000129087	0	0	0	0	0	0	0.000209144	0	0.00118908	0	0	0.00152523	0	0.000530445	0	0.000324413	Species	0.0853416	0.200432
Firmicutes sp. [ref_mOTU_v25_02374]	0	0	0.000417118	0	0	0	0	0.00045893	0	0.000372336	0	0.00148827	0	0	0	0	0.0015725	0	Species	0.234981	0.320718
Firmicutes sp. [ref_mOTU_v25_03629]	0.000166327	0	0	0	0.000333369	0	0	0.000168032	0	0.00123584	0	0	0.00154258	0.00164964	0.00447576	0	0	0	Species	0.0856631	0.200432
Firmicutes species incertae sedis [meta_mOTU_v25_12231]	0	0	0	0	0	0	0	0	0	0.00101336	0	0.00236488	0	0	0	0.00323439	0	0	Species	0.0935181	0.211463
Firmicutes species incertae sedis [meta_mOTU_v25_12285]	0	0.000612809	0.000293722	0	0.000841019	0.00182655	0.000944822	0	0.00025338	0.0161788	0	0.00975151	0.00647245	0.00727744	0	0.00521841	0.00476886	0.00558043	Species	0.00370658	0.0261185
Firmicutes species incertae sedis [meta_mOTU_v25_12293]	0.000359045	0	0	0	0.00175033	0	0	0	0	0	0	0	0.00250705	0.00255571	0.00252371	0.00207737	0	0	Species	0.0923061	0.210291
Firmicutes species incertae sedis [meta_mOTU_v25_12369]	0	0	0	0	0	0	0	0	0.000322186	0	0.00346554	0	0	0	0	0	0	0.000914272	Species	0.261598	0.340921
Firmicutes species incertae sedis [meta_mOTU_v25_12501]	0.0037323	0.000450694	0	0.00212924	0	0.000726329	0.000831685	0.000417593	0.00029332	0	0	0	0	0	0	0	0	0	Species	0.0326419	0.108093
Firmicutes species incertae sedis [meta_mOTU_v25_12744]	0.000166327	0	0	0	0	0	0	0.000128751	0	0	0	0	0	0	0.00681208	0	0.00404102	0	Species	0.177031	0.288349
Firmicutes species incertae sedis [meta_mOTU_v25_12845]	0	0.000285734	0.000260941	0.0122421	0.00314023	0	0	0	0	0	0	0	0	0.00914703	0	0.00830948	0	0	Species	0.928635	0.93017
Firmicutes species incertae sedis [meta_mOTU_v25_12875]	0.00480052	0.000323654	0.0021505	0.0143178	0.0133732	0.000651833	0.0093911	0	0.00685009	0	0	0	0	0	0	0	0	0	Species	0.00684324	0.04147
Firmicutes species incertae sedis [meta_mOTU_v25_12975]	0	0.000432782	0	0.00106757	0	0	0	0.000896624	0.00112435	0.0144178	0.0141371	0.0136996	0.0052394	0.0204407	0.00452577	0.0329865	0.0171791	0.00723629	Species	0.000210987	0.00319645
Firmicutes species incertae sedis [meta_mOTU_v25_13184]	0	0	0	0.000194462	0	0	0	0	0.000247095	0	0	0	0	0	0	0	0	0	Species	0.153541	0.2825
Firmicutes species incertae sedis [meta_mOTU_v25_13274]	0	0	0	0	0	0	0	0	0	0.00472457	0.00230162	0.00453732	0.00116985	0.00295228	0	0.00384765	0	0.00150551	Species	0.00133804	0.0128706
Firmicutes species incertae sedis [meta_mOTU_v25_13989]	0	0.0003039	0	0.000336179	0	0.000612323	0	0	0	0	0.0020653	0	0	0	0	0	0	0	Species	0.713258	0.746519
Firmicutes species incertae sedis [meta_mOTU_v25_14146]	0	0.00110701	0.000719247	0.00207254	0.000523076	0	0	0.00118371	0	0	0	0	0	0	0	0	0	0	Species	0.0204625	0.084122
Flavonifractor plautii [ref_mOTU_v25_02971]	8.79955e-05	0.000422393	0.000535838	0.000418885	0.000167154	0.00155564	0.000729111	0.000282549	0.000446649	0.00856113	0.00156736	0.00424781	0.0032063	0.00318248	0.00407905	0.00186276	0	0.00349563	Species	0.0028026	0.0220568
Flavonifractor plautii [ref_mOTU_v25_05238]	6.6687e-05	0.0015564	0.000465404	0.00170752	0.000208875	0.000405395	0.000574056	0.000526828	0.000335424	0.0106206	0.00146375	0.00286254	0.000792466	0	0.00260457	0.00174665	0.00380748	0.000986459	Species	0.0663052	0.16954
Fournierella massiliensis [ref_mOTU_v25_08867]	0	0.000295056	0	0.000253482	0.000105391	0	0.000168492	0	0.000570671	0	0	0	0	0	0	0	0	0	Species	0.0292306	0.101426
Fusobacterium hwasookii/nucleatum [ref_mOTU_v25_01004]	0	0	0	0	0	0	0	0	0	0.00180353	0	0	0	0	0	0	0.000633538	0	Species	0.202857	0.305041
Fusobacterium nucleatum subsp. vincentii [ref_mOTU_v25_01002]	0	0.000161172	0	0	0	0.000226712	0	0	0	0	0	0	0	0	0	0	0	0	Species	0.157018	0.285158
Holdemanella biformis [ref_mOTU_v25_11382]	0	0	0	0	0.000209531	0	0	0	0.000195393	0	0	0	0	0.000971549	0	0	0	0	Species	0.581762	0.625084
Intestinibacter bartlettii [ref_mOTU_v25_03687]	0.000570811	0.000356161	0	0.000774512	0.000518668	0.00111498	0.000154921	0.000143394	0.000452433	0	0.00169228	0.0044747	0.000942568	0.00298026	0.000607299	0.0064148	0	0.000579991	Species	0.0614964	0.16203
Intestinimonas butyriciproducens [ref_mOTU_v25_03928]	0	0.000182602	0.000252521	0.000257648	0.00026163	0	0.000178338	0.000262935	0.000248805	0	0.00123605	0	0.00117132	0	0	0.00102439	0	0	Species	0.323398	0.396791
Intestinimonas massiliensis [ref_mOTU_v25_02970]	0	0.00049786	0.00061482	0.000506891	0.000526894	0.000524057	0.000708082	0.00016319	0.000986683	0.00402264	0.00163376	0.000773214	0.00234264	0	0.00163701	0	0.00298544	0.00115499	Species	0.026728	0.0969891
Lachnoclostridium phytofermentans [ref_mOTU_v25_04500]	0	0	0	0	0	0	0	0	0	0.000772641	0	0	0.000940355	0	0.00545286	0	0	0	Species	0.199716	0.302722
Lachnospira sp. [ref_mOTU_v25_05263]	0	0	0	0	0	0	0.000314376	0.000104398	0	0	0	0	0	0	0	0	0	0	Species	0.20728	0.308628
Lachnospiraceae species incertae sedis [meta_mOTU_v25_13776]	0.000238448	0	0	0	0	0.0020638	0.000599504	0	0.000335219	0	0	0	0	0	0	0	0	0	Species	0.128446	0.25965
Lactobacillus amylovorus/kitasatonis [ref_mOTU_v25_03351]	0	0	0	0	0	0	0	0	0	0	0	0.000382214	0	0	0	0	0	0.000486043	Species	0.153564	0.2825
Lactobacillus delbrueckii [ref_mOTU_v25_08641]	0	0	0	0	0	0	0	0	0	0.00797308	0	0.00324916	0	0	0	0	0.00605877	0.0154954	Species	0.0592509	0.160295
Lactobacillus helveticus/gallinarum [ref_mOTU_v25_03349]	0	0.00176176	0	0	0.000424031	0	0	0	0	0	0	0	0	0	0	0	0	0	Species	0.232106	0.318227
Lactobacillus mucosae [ref_mOTU_v25_02550]	0.00094378	0.000968633	0.000466759	0.000538921	0.01021	0.000853747	0.000401175	0	0.00170294	0.00183972	0.00144057	0.00119052	0.0107034	0.00284741	0.00384271	0.0025522	0.0238357	0.002315	Species	0.173907	0.288349
Lentisphaerae bacterium ADurb.Bin242 [meta_mOTU_v25_12416]	0	0.000957349	0.0157612	0	0	0	0.00201647	0.000253697	0.0009278	0	0	0	0	0	0	0	0	0	Species	0.213696	0.312836
Lentisphaerae species incertae sedis [meta_mOTU_v25_12568]	0	0.000562152	0.000330013	0	0	0	0.00123002	0.00183912	0.000810649	0	0	0	0	0	0	0	0	0	Species	0.0276137	0.0990171
Lentisphaerae species incertae sedis [meta_mOTU_v25_13401]	0	0.000398856	0	0	0	0	0.00426731	0	0.00371848	0	0	0	0	0	0	0	0	0	Species	0.128968	0.25965
Mailhella massiliensis [meta_mOTU_v25_14272]	0.000176149	0.000244497	0.000378643	0.00119654	0.000424421	0	0.000283024	0.000184897	0.000781571	0	0	0	0.00325123	0.00185764	0	0	0	0	Species	0.702754	0.738075
Methanobrevibacter boviskoreani [ref_mOTU_v25_03164]	0	0	0	0	0	0	0.00468337	0	0.00439138	0	0	0	0	0	0	0	0	0	Species	0.150323	0.281014
Methanobrevibacter smithii [ref_mOTU_v25_03695]	0	0.0244829	0.00398404	0	0	0	0.0085206	0	0.00349205	0	0	0.13245	0	0.00397107	0.000975196	0.00487418	0	0.328243	Species	0.220792	0.317281
methanogenic archaeon mixed culture ISO4-G1 [ref_mOTU_v25_08332]	0.00188261	0.00198376	0.000221748	0.00148682	0.00145965	0.000385174	0.000287405	0.000192703	0	0.0120158	0.0396554	0.0113522	0	0.0092391	0	0.0136404	0.0085088	0.00740041	Species	0.0166937	0.0784217
Muribaculum intestinale [ref_mOTU_v25_10099]	0.0025649	0.000987002	0.000992961	0.000935554	0.00149511	0.00215595	0.000264837	0.00237298	0.000582223	0	0	0	0	0	0	0	0	0	Species	0.000126339	0.00229162
Mycoplasma sp. CAG:472 [ref_mOTU_v25_07685]	0.0139945	0.00466772	0.0150514	0	0	0	0.0160119	0	0.0144017	0	0	0	0	0	0	0	0	0	Species	0.0116581	0.0625204
Mycoplasma sp. CAG:611 [meta_mOTU_v25_12292]	0	0.00109776	0	0	0	0	0.000529872	0	0.000697671	0	0	0	0	0	0	0	0	0	Species	0.0796329	0.191498
Mycoplasma sp. CAG:956 [ref_mOTU_v25_07689]	0	0.000102108	0	0	0	0	0.00065905	0	0	0.000765454	0.00357057	0.00438074	0	0.00415946	0	0.00519343	0	0	Species	0.0213317	0.0867583
Odoribacter splanchnicus [ref_mOTU_v25_03697]	0.000398938	0.00106365	0.000657816	0.000212764	0.000463068	0.000859845	0.00128888	0.000331732	0.00176333	0	0	0	0	0	0	0	0	0	Species	0.000305264	0.00403351
Olsenella mediterranea [ref_mOTU_v25_10254]	0.000409773	0.000259979	0	0	0	0	0.000337964	0.00026486	0	0	0	0	0	0.00127666	0	0	0	0	Species	0.997675	0.997675
Olsenella provencensis [ref_mOTU_v25_10173]	0.000359979	0.000848611	0.000186085	0	0.000512905	0	0.000169026	0.000165915	0	0	0	0	0	0	0	0	0	0	Species	0.0180826	0.081968
Olsenella scatoligenes [ref_mOTU_v25_03954]	0.000124195	0.00105694	0.000327625	0	0	0	0	0	0	0	0	0	0	0	0	0	0	0	Species	0.171435	0.28814
Olsenella sp. [ref_mOTU_v25_05072]	0.000149807	0	0	0	0.000210801	0	0	0.000219422	0	0	0	0	0	0	0	0	0	0	Species	0.0673291	0.171435
Olsenella sp. KH3B4 [ref_mOTU_v25_03956]	0.000253467	0.000359463	0	0	0	0	0	0.000320523	0.000328699	0	0	0	0	0	0	0	0	0	Species	0.0238506	0.0925726
Olsenella sp. Marseille-P2300 [ref_mOTU_v25_10001]	0	0	0	0	0	0	0	5.82725e-05	0.000189695	0	0	0	0	0	0	0	0	0	Species	0.213408	0.312836
Olsenella species incertae sedis [meta_mOTU_v25_14117]	0.000658547	0.000161173	0.000152105	0.000266183	0.000400533	0	0.000354702	0.000225713	0	0	0	0	0	0.00185718	0	0	0	0	Species	0.855773	0.870132
Olsenella umbonata [ref_mOTU_v25_06395]	0.000257835	0.000374237	0	0	0.000314058	0	0	0	0.000358293	0	0	0	0	0	0	0	0	0	Species	0.0242888	0.0925726
Oscillibacter ruminantium [ref_mOTU_v25_06505]	0	0.000357512	0.000277391	0.00136826	0.000213869	0	0.000272057	0	0	0	0.00199401	0.00139275	0	0	0.00159069	0	0	0.00205036	Species	0.165493	0.287559
Oscillibacter sp. [ref_mOTU_v25_03341]	0.000227904	0.000222049	0.000376526	0.000969502	0.00101454	0.00095978	0.00111908	0.00020188	0.000801567	0.0036122	0.00165447	0.00843067	0.00168619	0.0025034	0.00286175	0.0022056	0.00299364	0.00210423	Species	0.00313858	0.0231949
Oscillibacter sp. [ref_mOTU_v25_04664]	0.000174963	0.000533567	0.00187922	0.000513158	0.000437649	0.000613879	0.00146365	0.000285111	0.00105991	0.0129627	0.00698057	0.0105951	0.008074	0.00938774	0.00456818	0.0207527	0.0124609	0.00736844	Species	1.77101e-05	0.000766594
Oscillibacter sp. 1-3 [ref_mOTU_v25_07502]	0.000169455	0.000272913	0.000303256	0.000425047	0.000486609	0	0.000379884	0.000263535	0.000388673	0.010552	0.00446114	0.00346751	0.00352055	0.00408231	0.00160312	0.00251307	0.00451215	0.0027464	Species	0.000373985	0.00482202
Oscillibacter sp. 57_20 [meta_mOTU_v25_12282]	0	0	0.000391066	0.00112813	0	0.00155542	0.000641898	0.000379228	0	0.00165816	0.0056394	0.00308811	0.00173878	0.00392735	0.00463199	0.00412648	0	0.00250602	Species	0.000652227	0.0069342
Oscillibacter sp. 57_20 [meta_mOTU_v25_12610]	0.000515609	0.0016068	0.000840908	0.00221788	0.000801927	0.00206861	0.00197105	0.000807518	0.00122439	0.0408131	0.0352296	0.0289052	0.0165019	0.0207046	0.0150893	0.0150258	0.0215347	0.012999	Species	6.43975e-06	0.000354772
Oscillibacter sp. 57_20 [ref_mOTU_v25_10413]	0	0.000357315	0	0	0	0	0	0	0.00049257	0	0	0.00201083	0	0.00101505	0.00430803	0	0	0	Species	0.168303	0.28814
Oscillibacter sp. CAG:155 [meta_mOTU_v25_13424]	0.000393694	0.000762607	0.000251017	0.000622848	0	0	0.000518759	0.000427666	0.000315371	0	0	0.00382649	0.00132627	0	0	0.00203247	0	0.00544703	Species	0.144859	0.281014
Oscillibacter sp. PC13 [ref_mOTU_v25_10185]	0.000201199	0.000372271	0.000385583	0.000486655	0	0.000513187	0.000287405	0.000578682	0.000507988	0	0	0.00115289	0.0025301	0	0.00209272	0	0	0.000675293	Species	0.320207	0.395204
Oscillibacter species incertae sedis [meta_mOTU_v25_12353]	0	0.000510225	0.00203747	0.00142842	0.000649079	0.000607397	0.00097482	0	0.000902844	0.0150818	0.00506569	0.0104927	0.00556125	0.00367484	0.0032759	0.00288772	0.00964323	0.00635993	Species	0.000408601	0.00505331
Oscillibacter species incertae sedis [meta_mOTU_v25_12663]	0.0003749	0.000464493	0.00135382	0.000641923	0	0.0010535	0.000991107	0.000662568	0.000572823	0.0105343	0.00373148	0.00416746	0.00175028	0.00663045	0.00445095	0.00546294	0.00617036	0.00313048	Species	9.06934e-05	0.00196286
Oscillibacter species incertae sedis [meta_mOTU_v25_13092]	0	0.000306404	0.000257942	0.000427462	0	0	0.000541063	0	0	0.00602979	0	0.00502829	0.0018418	0	0	0.00459348	0.00676823	0	Species	0.0185851	0.0822087
Oscillibacter species incertae sedis [meta_mOTU_v25_13278]	0.000593085	0.00264517	0.00167806	0.00161584	0.00085716	0.000861628	0.00179295	0	0.00188783	0.0128272	0.0183361	0.00279127	0.00476895	0.0076443	0.00456854	0.00553111	0.00637243	0.0130074	Species	0.000852899	0.00876029
Oscillibacter valericigenes [ref_mOTU_v25_11796]	0.000196368	0	0.000202304	0.000941171	0	0	0.000309075	0	0.00025193	0.00192483	0	0.00121286	0.00253388	0	0.00264268	0.00216264	0.00428701	0.00264528	Species	0.00197384	0.0168472
Parabacteroides distasonis [ref_mOTU_v25_03640]	0.000269594	0	0.00514898	0	0	0	0	0.00467034	0	0	0	0	0	0	0	0	0	0	Species	0.137869	0.271586
Parabacteroides goldsteinii [ref_mOTU_v25_01679]	0	0	0.00025735	0	0	0	0	0.000359462	0	0	0	0	0	0	0	0	0	0	Species	0.156742	0.285158
Parabacteroides merdae [ref_mOTU_v25_05401]	0	0	0	0	0	0	0	0	0	0	0	0	0.00118186	0	0.00121746	0.002232	0	0	Species	0.0805311	0.192133
Parabacteroides sp. SN4 [ref_mOTU_v25_05402]	0	0.000303074	0	0.000407752	0.000293856	0	0.00100929	0.000632217	0.00108218	0	0	0	0.00235642	0	0.00341606	0.00131363	0	0	Species	0.422022	0.479822
Peptostreptococcaceae species incertae sedis [meta_mOTU_v25_13426]	0	0	0	0.000663433	0	0	0	0.000238964	0	0	0	0	0	0	0	0	0	0	Species	0.200889	0.303094
Phascolarctobacterium succinatutens [ref_mOTU_v25_03700]	0.00551437	0.0110889	0.00424828	0.0309517	0.0268596	0.0238739	0.0287316	0.0213413	0.0212587	0	0	0	0	0	0	0	0	0	Species	2.63597e-05	0.000840737
Porphyromonadaceae sp. [ref_mOTU_v25_04706]	0	0.00113696	0.000728601	0	0	0	0.00158274	0	0.00113171	0	0	0	0	0	0	0	0	0	Species	0.0298097	0.101543
Prevotella buccae [ref_mOTU_v25_01006]	0	0	5.75438e-05	0	0	0	0	0	0	0	0	0	0	0	0.00077898	0	0	0	Species	0.369408	0.430502
Prevotella copri [ref_mOTU_v25_03701]	0	0	0	0.0369846	0.073806	0.0321253	0	0.000204419	0	0	0.00170066	0	0	0	0	0	0	0	Species	0.0930816	0.211264
Prevotella sp. CAG:1092 [ref_mOTU_v25_07693]	0	0.00396499	0	0.133956	0.11908	0	0.0121972	0.0478321	0.0146528	0	0	0	0	0	0	0	0	0	Species	0.0537921	0.154493
Prevotella sp. CAG:1185 [ref_mOTU_v25_07694]	0	0	0	0.000243551	0.0002391	0	0	6.3132e-05	0	0	0	0	0	0	0	0	0	0	Species	0.100908	0.219176
Prevotella sp. CAG:520 [ref_mOTU_v25_00718]	0.0813058	0.0775595	0.0341174	0	0	0.00945172	0.122795	0.146508	0.136651	0	0	0	0	0	0	0	0	0	Species	0.0034376	0.0247998
Prevotella species incertae sedis [meta_mOTU_v25_12281]	0	0	0	0	0	0	0.000695947	0	0	0	0	0	0	0	0	0.00237289	0	0	Species	0.50737	0.559029
Prevotella species incertae sedis [meta_mOTU_v25_12332]	0	0	0	0.0183509	0.0507698	0.0222382	0	0	0	0	0	0	0	0	0	0	0	0	Species	0.103035	0.222203
Prevotella species incertae sedis [meta_mOTU_v25_12510]	0	0	0	0.00198836	0.00179967	0	0	0.00115903	0	0	0	0	0	0	0	0	0	0	Species	0.0710108	0.177821
Prevotella species incertae sedis [meta_mOTU_v25_12637]	0	0	0	0	0	0	0.000865449	0.000239202	0	0	0	0	0	0	0	0	0	0	Species	0.221634	0.317281
Prevotella species incertae sedis [meta_mOTU_v25_12932]	0.084322	0.0745737	0.0363446	0	0	0.00850528	0.133206	0.129659	0.150691	0	0	0	0	0	0	0	0	0	Species	0.00352127	0.0251046
Prevotella species incertae sedis [meta_mOTU_v25_13106]	0	0	0	0	0.000531536	0	0.000798962	0	0.000978902	0	0	0	0	0	0	0	0	0	Species	0.07292	0.18185
Prevotella stercorea [ref_mOTU_v25_00717]	0.000205644	0.000335171	0.000269	0	0	0	0.000883926	0.00133746	0.000711926	0.00415085	0	0	0.0048154	0	0.00232693	0	0	0	Species	0.235921	0.321277
Proteobacteria bacterium CAG:495 [ref_mOTU_v25_07717]	0.00439352	0.00168675	0.000815045	0	0	0	0	0	0	0	0	0	0	0	0	0	0	0	Species	0.140046	0.274653
Pseudoflavonifractor capillosus [ref_mOTU_v25_02969]	0.000286249	0.000862214	0.0013491	0.000575128	0.000475249	0.000326469	0.000973307	0.000332791	0.000620657	0.00305501	0.00461384	0.00502902	0.00331521	0.00182162	0.00679216	0.00327605	0.00371906	0.00185207	Species	3.20687e-05	0.000971681
Pseudoflavonifractor sp. Marseille-P3106 [ref_mOTU_v25_10245]	0	0.000250914	0.00156909	0	0	0	0.000838175	0.000306247	0	0.00360707	0	0	0.00267353	0	0.0104914	0	0.0340786	0	Species	0.173944	0.288349
Pseudoflavonifractor species incertae sedis [meta_mOTU_v25_14283]	0	0	0	0	0	0	0	0	0	0	0	0	0.00635488	0	0	0.00598716	0	0	Species	0.150286	0.281014
Rhodospirillaceae species incertae sedis [meta_mOTU_v25_13803]	0.00184258	0.000747938	0.00092223	0.00782607	0.0161427	0.00211846	0.00816064	0.00105073	0.00174759	0	0	0	0	0	0	0	0	0.00706438	Species	0.0694962	0.17475
Rikenellaceae sp. [ref_mOTU_v25_03593]	7.43084e-05	0	0	0	0.000101924	0	6.90115e-05	8.19394e-05	0	0	0	0	0.0050859	0	0.00128225	0	0	0	Species	0.252526	0.333401
Romboutsia timonensis [ref_mOTU_v25_09389]	0	0	0	0.000422659	0.000229858	0	0	0.000341733	0	0	0.00136776	0	0	0	0	0	0	0	Species	0.801677	0.824815
Roseburia hominis [ref_mOTU_v25_00861]	4.97899e-05	0.00147723	0	0	0	0	0	0	0	0	0	0	0	0	0	0	0	0	Species	0.314932	0.390284
Roseburia intestinalis [ref_mOTU_v25_03702]	0	0.000202548	0	0.000205313	0.00010078	0	0	0	0	0	0	0	0	0	0	0	0	0	Species	0.0774513	0.189256
Roseburia inulinivorans [ref_mOTU_v25_00860]	0	0	0	0	0	0	6.9521e-05	0	0	0	0	0	0	0	0.00434929	0	0	0	Species	0.339815	0.406478
Roseburia sp. [ref_mOTU_v25_03649]	0	0.000172116	0	0	0	0	0.00031455	0	0	0	0	0	0	0	0	0	0	0	Species	0.170572	0.28814
Roseburia sp. [ref_mOTU_v25_03650]	0	0.000467723	0	0	0	0.000121383	0.000154921	5.5214e-05	0	0.00106279	0	0	0.00698567	0	0.00723356	0	0	0	Species	0.138034	0.271586
Roseburia sp. 40_7 [meta_mOTU_v25_12352]	0.000540335	0.00118856	0	0	0	0	0	0.000444929	0.000670439	0	0.0042935	0	0.00363474	0	0.00462872	0	0.00312114	0	Species	0.0639074	0.165504
Roseburia sp. 831b [ref_mOTU_v25_07577]	0	0	0	0.00409991	0.00191556	0	0	0	0	0	0	0	0	0	0	0	0	0	Species	0.181196	0.290185
Roseburia sp. CAG:182 [meta_mOTU_v25_12852]	0	0.000314666	0	0	0	0.00401782	0	0	0	0	0	0	0	0	0	0	0	0	Species	0.293725	0.368753
Roseburia sp. CAG:309 [ref_mOTU_v25_07705]	0	0	0	0	0	0	0.000177324	0	0	0	0	0	0.000906404	0	0	0	0	0	Species	0.44142	0.497213
Roseburia sp. CAG:471 [ref_mOTU_v25_03598]	0.000196942	0.000372599	0.000874646	0	0	0	0	0	0	0	0.00222985	0	0	0	0	0.00179572	0.00158384	0	Species	0.181964	0.290185
Ruminococcaceae bacterium D16 [ref_mOTU_v25_11463]	0.000907308	0.00209452	0.000731769	0.00150099	0.000737018	0.000675968	0.00154366	0.00021717	0.000710894	0.00899289	0.0181273	0.00489488	0.0158599	0.00355992	0.00924609	0.00127683	0.00825937	0.00638962	Species	0.000891369	0.00900283
Ruminococcaceae bacterium D5 [ref_mOTU_v25_08483]	0	0.000400056	0.000258716	0	0	0	0.000439656	0.000243162	0.000179313	0	0	0	0	0	0	0	0	0	Species	0.0117707	0.0625705
Ruminococcaceae species incertae sedis [meta_mOTU_v25_12239]	0	0	0.000191149	0	0	0	0.000444714	0.000152259	0	0	0	0	0.00206121	0	0.00451058	0	0	0	Species	0.240216	0.322774
Ruminococcaceae species incertae sedis [meta_mOTU_v25_12259]	0.000101101	0.000263045	0	0	0	0	0.000821736	0	0	0.0074782	0.0124926	0	0.00566875	0	0.00730477	0	0.00648622	0	Species	0.0131939	0.0677586
Ruminococcaceae species incertae sedis [meta_mOTU_v25_12264]	0	0.000235298	0.00017779	0	0	0	0.000255145	0	0.000211484	0	0	0	0	0	0	0	0	0	Species	0.0240777	0.0925726
Ruminococcaceae species incertae sedis [meta_mOTU_v25_12286]	0.00015037	0	0	0.000215042	0	0.00130148	0	0	0	0	0	0	0	0	0.00514489	0	0	0	Species	0.52112	0.572099
Ruminococcaceae species incertae sedis [meta_mOTU_v25_12396]	0	0.000189273	0	0	0	0	0	0.000291712	0	0	0	0	0.00305131	0	0.00991945	0	0	0	Species	0.230186	0.317281
Ruminococcaceae species incertae sedis [meta_mOTU_v25_12664]	0	0.000245663	0	0	0	0	0	0	0	0	0	0	0.00513134	0	0.00344625	0.00356779	0.00124587	0.00127218	Species	0.0251108	0.0939329
Ruminococcaceae species incertae sedis [meta_mOTU_v25_13151]	0.00104429	0.000647715	0	0.000892407	0	0.00180552	0.000155887	0.000538352	0.000931041	0	0	0	0	0	0	0	0	0	Species	0.00340504	0.0247998
Ruminococcaceae species incertae sedis [meta_mOTU_v25_13305]	0	0	0	0	0	0	0	0	0	0	0	0	0.00185437	0	0.00343373	0	0	0	Species	0.171397	0.28814
Ruminococcus bromii [ref_mOTU_v25_00853]	0.000787183	0.000799321	0.00341607	0.0356301	0.00441812	0.0003153	0.000665573	0	0.00298713	0.012244	0.00940982	0.0155053	0.016274	0.00746508	0.0145168	0.00606563	0.00310452	0.00393778	Species	0.307011	0.382816
Ruminococcus sp. [ref_mOTU_v25_03651]	0	0	0	0.000115672	0.000340675	0	0	0	0	0	0	0	0	0	0	0	0	0	Species	0.20553	0.308296
Ruminococcus sp. CAG:177 [meta_mOTU_v25_12400]	0	0.0165637	0	0	0	0	0	0	0	0	0.0365544	0.0246897	0.0292516	0.00489239	0	0.00331732	0	0.0225399	Species	0.0402493	0.125082
Ruminococcus sp. CAG:563 [ref_mOTU_v25_03654]	0	0	0.000838391	0.000209447	0	0.000728138	0	0.00012143	8.20828e-05	0	0	0	0.00249434	0	0	0	0.0193937	0.00725897	Species	0.184746	0.292826
Ruminococcus sp. CAG:579 [ref_mOTU_v25_07711]	0	0.00150143	0	0.000218194	0	0	0	0	0	0	0	0	0	0	0.00359307	0	0	0	Species	0.636586	0.679174
Ruminococcus sp. CAG:624 [ref_mOTU_v25_07712]	0	0	0	0	0	0	0	0	0	0.00138159	0	0	0.000840741	0	0.0065003	0	0.00114349	0	Species	0.137321	0.271586
Ruminococcus species incertae sedis [meta_mOTU_v25_12766]	0	0	0.000389599	0.000443355	0	0	0.00101039	0.000355112	0.000688559	0	0	0	0	0	0	0	0	0	Species	0.0169515	0.0786805
Ruthenibacterium lactatiformans [ref_mOTU_v25_04716]	7.49381e-05	0.000124477	0.000400036	0.000559772	0.000367744	0.000525332	0.00010595	0.000860364	0	0	0.000624192	0	0.000998981	0	0	0	0	0	Species	0.333363	0.40083
Saccharopolyspora rectivirgula [ref_mOTU_v25_03834]	0	0	0.000416449	0.000204764	0	0.00034246	0	0	0	0.0034206	0	0	0	0	0	0	0.00272396	0	Species	0.227594	0.317281
Selenomonadaceae species incertae sedis [meta_mOTU_v25_13010]	0.00144018	0.0121062	0.00101268	0.0129056	0.00199977	0.00914685	0.00631875	0.000254322	0.00387867	0	0	0	0	0	0	0	0	0	Species	0.00412675	0.0276174
Sphaerochaeta sp. Phil3 [ref_mOTU_v25_10526]	0	0	0	0	0	0	0.000474133	0	0.000195393	0	0	0	0	0	0	0	0	0	Species	0.190472	0.295207
Streptococcus sp. [ref_mOTU_v25_00900]	0	0.000223027	0.000994722	0	0	0	0.000309465	0.000364891	0.00012749	0	0	0	0	0	0	0	0	0	Species	0.0530905	0.153204
Succinivibrio dextrinosolvens [meta_mOTU_v25_12719]	0.172364	0.00332547	0.0286963	0	0	0.0773002	0.00143373	0	0.000927103	0	0	0	0	0	0	0	0	0	Species	0.126243	0.256722
Succinivibrionaceae sp. [ref_mOTU_v25_03663]	0.0829641	0.000732266	0.0139586	0	0	0.0379366	0.00196164	0	0.000494756	0	0	0	0	0	0	0	0	0	Species	0.123401	0.254954
Terrisporobacter glycolicus [ref_mOTU_v25_02186]	0	0	0	0.00122559	0.000218487	0	0	0.000216204	0	0	0	0	0	0	0	0	0	0	Species	0.187156	0.294312
Terrisporobacter othiniensis [ref_mOTU_v25_02187]	0	0	0	0.00238684	0	0	0	0.000432407	0	0	0	0	0	0	0	0	0	0	Species	0.251941	0.333355
Tissierellia bacterium KA00581 [ref_mOTU_v25_08645]	0.000164976	0	0	0	0.000114829	0.000121205	0	0	0	0.000409384	0	0	0	0	0	0	0	0.000339746	Species	0.527249	0.576738
Treponema berlinense [ref_mOTU_v25_10707]	0.0906333	0.0102976	0.00958686	0.0369937	0.0226941	0.018908	0.0021488	0.00358546	0.00514678	0	0	0	0	0	0	0	0	0	Species	0.0298262	0.101543
Treponema succinifaciens [ref_mOTU_v25_11997]	0.000484266	0.000322345	0.030387	0	0	0	0.00183688	0	0.0094151	0	0	0	0	0	0	0.000489195	0	0	Species	0.18507	0.292826
Tyzzerella nexilis [ref_mOTU_v25_03689]	0	6.90168e-05	0	0	0	0	0.000154729	0	0	0	0	0.000811047	0	0	0	0.00110553	0	0	Species	0.210243	0.31075
Tyzzerella species incertae sedis [meta_mOTU_v25_12266]	0.00143428	0.00120925	0	0.00104125	0	0	0.00179716	0	0.000763588	0	0	0	0	0	0.00582301	0	0.00840237	0	Species	0.429387	0.487281
unclassified	0.170147	0.194723	0.274739	0.376384	0.314161	0.279678	0.241205	0.234082	0.251635	0.159372	0.14244	0.114854	0.223121	0.210686	0.136711	0.244824	0.149322	0.103358	Class	-	-
unclassified	0.364028	0.340034	0.57307	0.548307	0.483271	0.501454	0.442295	0.474296	0.406825	0.663683	0.613842	0.57648	0.57565	0.626431	0.516253	0.654685	0.608372	0.382961	Family	-	-
unclassified	0.472863	0.39471	0.625331	0.573687	0.513885	0.577776	0.477471	0.479937	0.428323	0.680004	0.641592	0.587853	0.607186	0.6341	0.559813	0.652518	0.623238	0.398124	Genus	-	-
unclassified	0.138059	0.193992	0.268034	0.344309	0.283535	0.278299	0.238006	0.222612	0.244562	0.159782	0.14244	0.114854	0.223121	0.210686	0.136711	0.244824	0.149322	0.103698	Order	-	-
unclassified	0.123986	0.184813	0.245738	0.310469	0.260978	0.272459	0.218379	0.215029	0.228244	0.079458	0.0777761	0.0547242	0.19159	0.131727	0.104257	0.145542	0.0911618	0.041776	Phylum	-	-
unclassified	0.118694	0.18649	0.256821	0.3217	0.272461	0.284901	0.216698	0.223232	0.22785	0.0786872	0.0769982	0.0543393	0.139936	0.130212	0.0993178	0.145001	0.0800675	0.0407109	Species	-	-
uncultured Anaerotruncus sp. [ref_mOTU_v25_12068]	0	0	0	0	0	0	0	0.000221106	0	0	0	0	0	0	0	0.00357637	0	0	Species	0.362993	0.428242
uncultured Blautia sp. [ref_mOTU_v25_03662]	0	0	0.000210121	0.00096565	0.000392863	0	0	0.000546117	0	0	0	0	0	0	0	0	0	0	Species	0.0555291	0.157246
uncultured Blautia sp. [ref_mOTU_v25_11916]	0	0.000267463	0.00047679	0	0	0	0	0	0	0	0	0	0	0	0	0	0	0	Species	0.169041	0.28814
uncultured Clostridium sp. [ref_mOTU_v25_06391]	0	0	0.000310121	0	0	0.000622678	0	0	0	0	0	0	0	0	0	0	0	0	Species	0.17673	0.288349
uncultured Clostridium sp. [ref_mOTU_v25_11607]	9.82165e-05	0.000259682	0	0	0.000102544	0	0	0	0.0014234	0	0	0	0	0	0	0	0	0	Species	0.19439	0.297476
uncultured Clostridium sp. [ref_mOTU_v25_11611]	0	0.000201476	0	0	0	0	0	0	0	0	0	0	0	0	0	0	0	0.00173332	Species	0.393015	0.451074
uncultured Flavonifractor sp. [ref_mOTU_v25_07315]	0	0.000491765	0	0.000549951	0.000299549	0	0.000608503	0.000533498	0.000396168	0.00192483	0.00113644	0.000983474	0.00117261	0.00308887	0.000797287	0.00252682	0.00154858	0.00150499	Species	0.000155892	0.00262418
Weissella confusa [ref_mOTU_v25_00254]	0	0.00118199	0	0	0.000342909	0	0	0	0	0.000674478	0	0	0	0	0	0	0	0	Species	0.542592	0.586115

## Sheet: B.Taxa_of_CMm
Taxonomy	R63	R64	R65	R66	R67	R68	R69	R70	R71	R72	Clades
group	CMm	CMm	CMm	CMm	CMm	CMm	CMm	CMm	CMm	CMm	-
[Bacteroides] pectinophilus [ref_mOTU_v25_03684]	0.00193728	0.00128892	0.00060476	0.000111136	0.000437263	0.00284013	0.00027035	0.000297551	0.000369847	0.000265262	Speciese
[Eubacterium] eligens [ref_mOTU_v25_02376]	0.00237014	0	0.000135368	0	0.00112125	0.00154572	6.4447e-05	0.000977993	0.000360786	0.000245367	Speciese
[Eubacterium] rectale [ref_mOTU_v25_03657]	0.00907855	0.000131387	0.000362086	9.81719e-05	0.00162454	0.000548475	0.000281541	0.0022642	0.000310853	0.000330224	Speciese
Acidiphilium sp. CAG:727 [ref_mOTU_v25_07585]	0.000126742	0.00157196	0.00135586	0	0	0.00358019	0	0	0.00018783	0	Speciese
Alistipes sp. CAG:435 [ref_mOTU_v25_07587]	0	0	0	0.0563051	0	0	0	0.000162245	0	0.0172349	Speciese
Anaerotruncus sp. CAG:390 [meta_mOTU_v25_14000]	0	0.00355971	0.0021098	0.0206792	0.00937657	0.00122232	0.0127204	0.0063281	0.00191985	0.0082556	Speciese
Archaea;Euryarchaeota	0	0.000624419	0.00143146	0.00569697	0.000862605	0	0.0111657	0.00041902	0.000748674	0.00163971	Phylum
Archaea;Euryarchaeota;Methanobacteria	0	0.000624419	0.00143146	0.00569697	0.000862605	0	0.0111657	0.00041902	0.000748674	0.00163971	Class
Archaea;Euryarchaeota;Methanobacteria;Methanobacteriales	0	0.000624419	0.00143146	0.00569697	0.000862605	0	0.0111657	0.00041902	0.000748674	0.00163971	Order
Archaea;Euryarchaeota;Methanobacteria;Methanobacteriales;Methanobacteriaceae	0	0.000624419	0.00143146	0.00569697	0.000862605	0	0.0111657	0.00041902	0.000748674	0.00163971	Family
Archaea;Euryarchaeota;Methanobacteria;Methanobacteriales;Methanobacteriaceae;Methanobrevibacter	0	0.000624419	0.00143146	0.00569697	0.000862605	0	0.0111657	0.00041902	0.000748674	0.00163971	Genus
Bacteria species incertae sedis [meta_mOTU_v25_12280]	0.000206881	0.000237265	0.00138838	0	0	0	0	0	0.00169669	0.00162234	Speciese
Bacteria;Actinobacteria	0.00613971	0.000792684	0.0121533	0.00157483	0.05046	0.000494034	0.00250123	0.0368702	0.0218593	0.0024606	Phylum
Bacteria;Actinobacteria;Actinobacteria	0.00597828	0.000792684	0.0121533	0.00157483	0.0501515	0.000354824	0.00250123	0.0366511	0.0218593	0.00244099	Class
Bacteria;Actinobacteria;Actinobacteria;Bifidobacteriales	0.00597828	0.000792684	0.0121533	0.00157483	0.0501515	0.000354824	0.00250123	0.0366511	0.0218593	0.00244099	Order
Bacteria;Actinobacteria;Actinobacteria;Bifidobacteriales;Bifidobacteriaceae	0.00597828	0.000792684	0.0121533	0.00157483	0.0501515	0.000354824	0.00250123	0.0366511	0.0218593	0.00244099	Family
Bacteria;Actinobacteria;Actinobacteria;Bifidobacteriales;Bifidobacteriaceae;Bifidobacterium	0.00597828	0.000792684	0.0121533	0.00157483	0.0501515	0.000354824	0.00250123	0.0366511	0.0218593	0.00244099	Genus
Bacteria;Actinobacteria;Coriobacteriia	0.000161425	0	0	0	0.000308536	0.000139211	0	0.000219141	0	1.96058e-05	Class
Bacteria;Actinobacteria;Coriobacteriia;Coriobacteriales	0.000161425	0	0	0	0.000308536	0.000139211	0	0.000219141	0	1.96058e-05	Order
Bacteria;Actinobacteria;Coriobacteriia;Coriobacteriales;Coriobacteriaceae	0.000161425	0	0	0	0.000308536	0.000139211	0	0.000219141	0	1.96058e-05	Family
Bacteria;Actinobacteria;Coriobacteriia;Coriobacteriales;Coriobacteriaceae;Collinsella	0.000161425	0	0	0	0.000308536	0.000139211	0	0.000219141	0	1.96058e-05	Genus
Bacteria;Bacteroidetes	0.434692	0.134817	0.193511	0.309981	0.188189	0.328199	0.165498	0.246211	0.258477	0.134936	Phylum
Bacteria;Bacteroidetes;Bacteroidia	0.434692	0.134817	0.193511	0.309981	0.188189	0.328199	0.165498	0.246211	0.258477	0.134936	Class
Bacteria;Bacteroidetes;Bacteroidia;Bacteroidales	0.434692	0.134817	0.193511	0.309981	0.188189	0.328199	0.165498	0.246211	0.258477	0.134936	Order
Bacteria;Bacteroidetes;Bacteroidia;Bacteroidales;Bacteroidaceae	0	0.000935163	0.00204477	0.00284467	0.00628383	0.00150266	0.00130407	0.00306192	0.00438255	0.00400884	Family
Bacteria;Bacteroidetes;Bacteroidia;Bacteroidales;Bacteroidaceae;Bacteroides	0	0.000935163	0.00204477	0.00284467	0.00628383	0.00150266	0.00130407	0.00306192	0.00438255	0.00400884	Genus
Bacteria;Bacteroidetes;Bacteroidia;Bacteroidales;NA;Prevotella	0	0	6.77012e-05	0.0187827	0	0.000169241	0	0.000556734	0	5.95805e-05	Genus
Bacteria;Bacteroidetes;Bacteroidia;Bacteroidales;Prevotellaceae	0.433695	0.1133	0.116936	0.0103353	0.0521372	0.298382	0.10877	0.193371	0.116025	0.0722657	Family
Bacteria;Bacteroidetes;Bacteroidia;Bacteroidales;Prevotellaceae;Prevotella	0.424744	0.113047	0.116849	0.0102135	0.0512319	0.293161	0.108461	0.190261	0.115447	0.0718536	Genus
Bacteria;Bacteroidetes;Bacteroidia;Bacteroidales;Rikenellaceae	0	0	0	0.0563051	0	0	0	0.000162245	0	0.0172349	Family
Bacteria;Bacteroidetes;Bacteroidia;Bacteroidales;Rikenellaceae;Alistipes	0	0	0	0.0563051	0	0	0	0.000162245	0	0.0172349	Genus
Bacteria;Chloroflexi	0.00122101	0.0238829	0.0393994	0.305058	0.221311	0.00725273	0.02596	0.146309	0.0514705	0.163815	Phylum
Bacteria;Chloroflexi;Dehalococcoidia	0.00122101	0.0238829	0.0393994	0.305058	0.221311	0.00725273	0.02596	0.146309	0.0514705	0.163815	Class
Bacteria;Chloroflexi;Dehalococcoidia;Dehalococcoidales	0.00122101	0.0238829	0.0393994	0.305058	0.221311	0.00725273	0.02596	0.146309	0.0514705	0.163815	Order
Bacteria;Firmicutes	0.151804	0.62148	0.59292	0.278378	0.398886	0.37976	0.615398	0.333484	0.483293	0.456156	Phylum
Bacteria;Firmicutes;Bacilli	0.000663023	0.000798855	0.00259675	0.00313724	0.00345508	0.00420572	0.00155395	0.000340668	0.0034001	0.00587447	Class
Bacteria;Firmicutes;Bacilli;Lactobacillales	0.000663023	0.000798855	0.00259675	0.00313724	0.00345508	0.00420572	0.00155395	0.000340668	0.0034001	0.00587447	Order
Bacteria;Firmicutes;Bacilli;Lactobacillales;Lactobacillaceae	0.000663023	0.000798855	0.00259675	0.00313724	0.00345508	0.00420572	0.00155395	0.000340668	0.0034001	0.00587447	Family
Bacteria;Firmicutes;Bacilli;Lactobacillales;Lactobacillaceae;Lactobacillus	0.000663023	0.000798855	0.00259675	0.00313724	0.00345508	0.00420572	0.00155395	0.000340668	0.0034001	0.00587447	Genus
Bacteria;Firmicutes;Clostridia	0.148676	0.531622	0.524777	0.248818	0.379606	0.362813	0.553768	0.307986	0.427424	0.368963	Class
Bacteria;Firmicutes;Clostridia;Clostridiales	0.148676	0.531352	0.524351	0.245909	0.375004	0.362243	0.55021	0.307371	0.425148	0.363241	Order
Bacteria;Firmicutes;Clostridia;Clostridiales;Clostridiaceae	0.0710197	0.311476	0.0869441	0.0786196	0.0676921	0.185366	0.110716	0.0956829	0.129391	0.16441	Family
Bacteria;Firmicutes;Clostridia;Clostridiales;Clostridiaceae;Butyricicoccus	0	0	0	0.000161588	0	0	0	0.000130041	0	0	Genus
Bacteria;Firmicutes;Clostridia;Clostridiales;Clostridiaceae;Clostridium	0.0710197	0.305635	0.0864097	0.0782711	0.0666906	0.18365	0.110716	0.0953796	0.129139	0.164322	Genus
Bacteria;Firmicutes;Clostridia;Clostridiales;Eubacteriaceae	0.0208172	0.00744174	0.000348206	0.000616928	0.0459175	0.00502739	0.00384049	0.00424008	0.0016988	0.00379959	Family
Bacteria;Firmicutes;Clostridia;Clostridiales;Eubacteriaceae;Eubacterium	0.0208172	0.00744174	0.000348206	0.000616928	0.0459175	0.00502739	0.00384049	0.00424008	0.0016988	0.00379959	Genus
Bacteria;Firmicutes;Clostridia;Clostridiales;Lachnospiraceae	0.0215373	0.015298	0.00712167	0.00201418	0.00825943	0.0329883	0.00586458	0.0318947	0.0104335	0.00624789	Family
Bacteria;Firmicutes;Clostridia;Clostridiales;Lachnospiraceae;Butyrivibrio	0.000167676	0.000216872	0.000231231	0	0	0.00477943	0.000378944	0.00188971	0.000281248	0.000315065	Genus
Bacteria;Firmicutes;Clostridia;Clostridiales;Lachnospiraceae;Coprococcus	0.00029989	0.000130416	0	0	0	0.000247072	0	0	0	0.000102845	Genus
Bacteria;Firmicutes;Clostridia;Clostridiales;Lachnospiraceae;Dorea	0.000426022	0.000216367	8.42759e-05	5.87941e-05	0	0.00019426	0.000638159	0.000132303	0.000131249	0.000224552	Genus
Bacteria;Firmicutes;Clostridia;Clostridiales;Lachnospiraceae;Roseburia	0.00985197	0.00676006	0.00113728	0.000430205	0.00314961	0.0227304	0.00244746	0.020781	0.00496005	0.00319479	Genus
Bacteria;Firmicutes;Clostridia;Clostridiales;Oscillospiraceae	0.000547129	0.00680774	0.00849758	0.005048	0.00920064	0.00375198	0.0329484	0.00953071	0.014874	0.0117592	Family
Bacteria;Firmicutes;Clostridia;Clostridiales;Oscillospiraceae;Oscillibacter	0.000547129	0.00680774	0.00849758	0.005048	0.00920064	0.00375198	0.0329484	0.00953071	0.014874	0.0117592	Genus
Bacteria;Firmicutes;Clostridia;Clostridiales;Ruminococcaceae	0.0266916	0.0496872	0.120526	0.0500163	0.0694028	0.0200399	0.0647808	0.0366611	0.0968012	0.0481025	Family
Bacteria;Firmicutes;Clostridia;Clostridiales;Ruminococcaceae;Anaerotruncus	0	0.00355971	0.0021098	0.0206792	0.00937657	0.00122232	0.0127204	0.0063281	0.00191985	0.0082556	Genus
Bacteria;Firmicutes;Clostridia;Clostridiales;Ruminococcaceae;Faecalibacterium	0.0193525	0.00506386	0.00304195	0.00164646	0.00495919	0.00587802	0.00309534	0.00485708	0.00759383	0.00301129	Genus
Bacteria;Firmicutes;Clostridia;Clostridiales;Ruminococcaceae;Ruminococcus	0.00187795	0.0388367	0.114563	0.027336	0.0530771	0.0101937	0.047511	0.0240441	0.0843349	0.0360598	Genus
Bacteria;Firmicutes;Erysipelotrichia	0.000285779	0.0034481	0.0129496	0.000297777	0	0.00281569	0.00567726	0.00247626	0.00389908	0	Class
Bacteria;Firmicutes;Erysipelotrichia;Erysipelotrichales	0.000285779	0.0034481	0.0129496	0.000297777	0	0.00281569	0.00567726	0.00247626	0.00389908	0	Order
Bacteria;Firmicutes;Erysipelotrichia;Erysipelotrichales;Erysipelotrichaceae	0.000285779	0.0034481	0.0129496	0.000297777	0	0.00281569	0.00567726	0.00247626	0.00389908	0	Family
Bacteria;Firmicutes;Erysipelotrichia;Erysipelotrichales;Erysipelotrichaceae;Coprobacillus	0	0.00323073	0.0129496	0.000297777	0	0.00256025	0.00540405	0.00235165	0.00323463	0	Genus
Bacteria;Firmicutes;Erysipelotrichia;Erysipelotrichales;Erysipelotrichaceae;Holdemanella	0.000285779	0.000217378	0	0	0	0.000255443	0.000273208	0.000124607	0.000664448	0	Genus
Bacteria;Firmicutes;Negativicutes	0.00136004	0.000770164	0.000218699	0.011727	0	0.000711864	0.00294876	0.000214963	0.000248973	0.000174292	Class
Bacteria;Firmicutes;Negativicutes;Acidaminococcales	0.00136004	0.000770164	0.000218699	0.011727	0	0.000711864	0.00294876	0.000214963	0.000248973	0.000174292	Order
Bacteria;Firmicutes;Negativicutes;Acidaminococcales;Acidaminococcaceae	0.00136004	0.000770164	0.000218699	0.011727	0	0.000711864	0.00294876	0.000214963	0.000248973	0.000174292	Family
Bacteria;Firmicutes;Negativicutes;Acidaminococcales;Acidaminococcaceae;Phascolarctobacterium	0.00136004	0.000770164	0.000218699	0.011727	0	0.000711864	0.00294876	0.000214963	0.000248973	0.000174292	Genus
Bacteria;Proteobacteria	0.270213	0.00750331	0.0116614	0.00444368	0.0119953	0.0563656	0.00759043	0.0844016	0.0439961	0.0703098	Phylum
Bacteria;Proteobacteria;Alphaproteobacteria	0.000126742	0.00157196	0.00135586	0	0	0.00358019	0	0	0.00018783	0	Class
Bacteria;Proteobacteria;Alphaproteobacteria;Rhodospirillales	0.000126742	0.00157196	0.00135586	0	0	0.00358019	0	0	0.00018783	0	Order
Bacteria;Proteobacteria;Alphaproteobacteria;Rhodospirillales;Acetobacteraceae	0.000126742	0.00157196	0.00135586	0	0	0.00358019	0	0	0.00018783	0	Family
Bacteria;Proteobacteria;Alphaproteobacteria;Rhodospirillales;Acetobacteraceae;Acidiphilium	0.000126742	0.00157196	0.00135586	0	0	0.00358019	0	0	0.00018783	0	Genus
Bacteria;Proteobacteria;Deltaproteobacteria	0	0.00019632	0.0010593	0.0011037	0.000787594	0	7.21134e-05	0.00286167	0	0.000186781	Class
Bacteria;Proteobacteria;Deltaproteobacteria;Desulfovibrionales	0	0.00019632	0.0010593	0.0011037	0.000787594	0	7.21134e-05	0.00286167	0	0.000186781	Order
Bacteria;Proteobacteria;Deltaproteobacteria;Desulfovibrionales;Desulfovibrionaceae	0	0.00019632	0.0010593	0.0011037	0.000787594	0	7.21134e-05	0.00286167	0	0.000186781	Family
Bacteria;Proteobacteria;Deltaproteobacteria;Desulfovibrionales;Desulfovibrionaceae;Desulfovibrio	0	0.00019632	0.0010593	0.0011037	0.000787594	0	7.21134e-05	0.00286167	0	0.000186781	Genus
Bacteria;Proteobacteria;Epsilonproteobacteria	0.0207426	0.000403335	0.0032196	0.000595433	0.00174328	0.00158716	0.00253867	0.00407538	0.00318459	0.00293872	Class
Bacteria;Proteobacteria;Epsilonproteobacteria;Campylobacterales	0.0207426	0.000403335	0.0032196	0.000595433	0.00174328	0.00158716	0.00253867	0.00407538	0.00318459	0.00293872	Order
Bacteria;Proteobacteria;Epsilonproteobacteria;Campylobacterales;Helicobacteraceae	0.0207426	0.000403335	0.0032196	0.000595433	0.00174328	0.00158716	0.00253867	0.00407538	0.00318459	0.00293872	Family
Bacteria;Proteobacteria;Epsilonproteobacteria;Campylobacterales;Helicobacteraceae;Helicobacter	0.0207426	0.000403335	0.0032196	0.000595433	0.00174328	0.00158716	0.00253867	0.00407538	0.00318459	0.00293872	Genus
Bacteria;Proteobacteria;Gammaproteobacteria	0.249343	0.0053317	0.00602667	0.00274455	0.00946445	0.0511983	0.00497965	0.0774645	0.0406237	0.0671843	Class
Bacteria;Proteobacteria;Gammaproteobacteria;Aeromonadales	0.249343	0.0053317	0.00602667	0.00274455	0.00946445	0.0511983	0.00497965	0.0774645	0.0406237	0.0671843	Order
Bacteria;Proteobacteria;Gammaproteobacteria;Aeromonadales;Succinivibrionaceae	0.249343	0.0053317	0.00602667	0.00274455	0.00946445	0.0511983	0.00497965	0.0774645	0.0406237	0.0671843	Family
Bacteria;Proteobacteria;Gammaproteobacteria;Aeromonadales;Succinivibrionaceae;Succinivibrio	0.102299	0.00283161	0.00366096	0.00148122	0.00608965	0.0231144	0.00244523	0.037781	0.0167028	0.0292807	Genus
Bacteria;Spirochaetes	0	0.00579207	0.018803	0.0217001	0.00170222	0.0494095	0.00138223	0.00742754	0.00140106	0.00309413	Phylum
Bacteria;Spirochaetes;Spirochaetia	0	0.00579207	0.018803	0.0217001	0.00170222	0.0494095	0.00138223	0.00742754	0.00140106	0.00309413	Class
Bacteria;Spirochaetes;Spirochaetia;Spirochaetales	0	0.00579207	0.018803	0.0217001	0.00170222	0.0494095	0.00138223	0.00742754	0.00140106	0.00309413	Order
Bacteria;Spirochaetes;Spirochaetia;Spirochaetales;Spirochaetaceae	0	0.00579207	0.018803	0.0217001	0.00170222	0.0494095	0.00138223	0.00742754	0.00140106	0.00309413	Family
Bacteria;Spirochaetes;Spirochaetia;Spirochaetales;Spirochaetaceae;Sphaerochaeta	0	0	0.000651398	0.00221742	0.000403336	0.000490267	0.000869242	0.00123505	0.00111907	0.000266333	Genus
Bacteria;Spirochaetes;Spirochaetia;Spirochaetales;Spirochaetaceae;Treponema	0	0.00579207	0.0181517	0.0194827	0.00129888	0.0489192	0.000512989	0.00619248	0.000281994	0.00282779	Genus
Bacteria;Tenericutes	0	0.0168035	0.00100079	0.00296785	0.00187086	0.0094127	0.0293661	0.00693167	0.00490454	0.0344248	Phylum
Bacteria;Tenericutes;Mollicutes	0	0.0168035	0.00100079	0.00296785	0.00187086	0.0094127	0.0293661	0.00693167	0.00490454	0.0344248	Class
Bacteria;Tenericutes;Mollicutes;Mycoplasmatales	0	0.0168035	0.00100079	0.00296785	0.00187086	0.0094127	0.0293661	0.00693167	0.00490454	0.0344248	Order
Bacteria;Tenericutes;Mollicutes;Mycoplasmatales;Mycoplasmataceae	0	0.0168035	0.00100079	0.00296785	0.00187086	0.0094127	0.0293661	0.00693167	0.00490454	0.0344248	Family
Bacteria;Tenericutes;Mollicutes;Mycoplasmatales;Mycoplasmataceae;Mycoplasma	0	0.0168035	0.00100079	0.00296785	0.00187086	0.0094127	0.0293661	0.00693167	0.00490454	0.0344248	Genus
bacterium LF-3 [ref_mOTU_v25_03628]	0.00140116	0.000275093	0	0	0	0.000333221	0.00014752	0.000193446	0	0	Speciese
Bacteroidales species incertae sedis [meta_mOTU_v25_12424]	0	0	0.00458863	0.008888	0.00216481	0.0038313	0.0142054	0.0119897	0.0411521	0.00638959	Speciese
Bacteroidales species incertae sedis [meta_mOTU_v25_12895]	0.000997334	0.000268896	0.00143666	0.174215	0.0527821	0.00192151	0.00784327	0	0.00276533	0.000129088	Speciese
Bacteroidales species incertae sedis [meta_mOTU_v25_13388]	0	0.00563613	0.00220233	0.00157965	0.00159583	0.00127871	0.00167129	0.00145594	0.00536819	0.00116102	Speciese
Bacteroidales species incertae sedis [meta_mOTU_v25_13655]	0	0.000434757	0.00800805	0	0.00121277	0	0.000336556	0.00147834	0.000844701	0.00254386	Speciese
Bacteroidales species incertae sedis [meta_mOTU_v25_13898]	0	0.0142423	0.0582268	0.0370309	0.0720129	0.0211138	0.0313667	0.0341354	0.0879385	0.0311434	Speciese
Bacteroides sp. CAG:1060 [ref_mOTU_v25_07594]	0	0.000102015	0.000731971	0.000496989	0.00161918	0.000123956	0.000754349	0.00135402	0.00161971	0.0017354	Speciese
Bacteroides sp. CAG:709 [ref_mOTU_v25_07599]	0	0.000647041	9.04263e-05	0.00197521	0.00331792	0.000637489	0.000216461	0.000528589	0.000924449	0.00106469	Speciese
Bacteroides species incertae sedis [meta_mOTU_v25_13237]	0	0.000186107	0.00122237	0.000372474	0.00134673	0.000741216	0.000333261	0.00117931	0.0018384	0.00120875	Speciese
Bifidobacterium adolescentis [ref_mOTU_v25_02703]	0.000221116	0.000169314	0.005516	0.000597636	0.020587	0.000155318	0.000673738	0.0122179	0.00850824	0.000330703	Speciese
Bifidobacterium merycicum [ref_mOTU_v25_04325]	0.00575717	0.00062337	0.000425856	0.00043488	0.0135274	0.000199506	0.00165071	0.00620029	0.000387999	0.00197168	Speciese
Bifidobacterium pseudocatenulatum [ref_mOTU_v25_02700]	0	0	0.000294567	0	0.00632168	0	0.000176782	0.00311965	0.00150467	0	Speciese
Bifidobacterium ruminantium [ref_mOTU_v25_02702]	0	0	0.00591686	0.000542311	0.0097154	0	0	0.0151132	0.0114584	0.000138609	Speciese
Butyricicoccus sp. BB10 [meta_mOTU_v25_13554]	0	0	0	0.000161588	0	0	0	0.000130041	0	0	Speciese
Butyrivibrio crossotus [ref_mOTU_v25_03686]	0.000167676	0.000216872	0.000231231	0	0	0.00477943	0.000378944	0.00188971	0.000281248	0.000315065	Speciese
Clostridia species incertae sedis [meta_mOTU_v25_12619]	0	0	0	0.000679814	0.00460143	0.000322604	0.00286376	0.000464203	0.00203524	0.00557524	Speciese
Clostridia species incertae sedis [meta_mOTU_v25_14185]	0	0.000269675	0.000426231	0.00222944	0	0.000247912	0.000694349	0.000151163	0.00024107	0.000146447	Speciese
Clostridiaceae species incertae sedis [meta_mOTU_v25_12374]	0	0.00584095	0.000534436	0.000186841	0.00100158	0.00171593	0	0.0001732	0.000251732	8.76745e-05	Speciese
Clostridiales species incertae sedis [meta_mOTU_v25_12228]	0	0.00122361	0.00488166	0.00185528	0.00525846	0.000298321	0.00910386	0.00147772	0.00475029	0.00312084	Speciese
Clostridiales species incertae sedis [meta_mOTU_v25_12253]	0.000326794	0.00194996	0.00406043	0.00872681	0.0272177	0.0103798	0.0124828	0.000932593	0.00325055	0.00835515	Speciese
Clostridiales species incertae sedis [meta_mOTU_v25_12254]	0.000134535	0.00295544	0.0122332	0.00375822	0.00807653	0.00179201	0.0112647	0.0135939	0.00386799	0.00967614	Speciese
Clostridiales species incertae sedis [meta_mOTU_v25_12265]	0	0.000183704	0.000371034	6.79108e-05	0	0	0	0.000100184	0.00045239	0.000499931	Speciese
Clostridiales species incertae sedis [meta_mOTU_v25_12272]	0	0.00150708	0.00561946	0.00127671	0	0.00172832	0.00440023	0.00156007	0.000376992	0.00121689	Speciese
Clostridiales species incertae sedis [meta_mOTU_v25_12288]	0	0.000477682	0.00055655	0.000276134	0	0.000498084	0.00193621	0.000164171	0.000560935	0.000753483	Speciese
Clostridiales species incertae sedis [meta_mOTU_v25_12298]	0	0.000444378	0.000730315	0.000326053	0.000910961	0.000203509	0.00102595	0.000155726	0.000315465	0.000218349	Speciese
Clostridiales species incertae sedis [meta_mOTU_v25_12334]	0.000237657	0.00374533	0.0234088	0.00626416	0.00653443	0.00789496	0.0412814	0.00665199	0.0332448	0.00162171	Speciese
Clostridiales species incertae sedis [meta_mOTU_v25_12382]	0	0.00059692	0.000648774	0.000158628	0.00172243	0.000485909	0.00107817	0.000250131	0.00144713	0.000755312	Speciese
Clostridiales species incertae sedis [meta_mOTU_v25_12425]	0	0.000709383	0.00101654	0.000220626	0.0018996	0.000843868	0.00101679	0.00035405	0.000829861	0.000434485	Speciese
Clostridiales species incertae sedis [meta_mOTU_v25_12437]	0.000396641	0.00792396	0.00984269	0.00208446	0.0127013	0.00140415	0.0200828	0.00256551	0.00865714	0.00967621	Speciese
Clostridiales species incertae sedis [meta_mOTU_v25_12447]	0.000652203	0.00258334	0.000510758	0.00327456	0.00167156	0.00108605	0.00297881	0.00128614	0.00287133	0.000312384	Speciese
Clostridiales species incertae sedis [meta_mOTU_v25_12452]	0.000237657	0.00442844	0.0185082	0.00447826	0.00878297	0.00118716	0.00987076	0.00077331	0.00331722	0.00113155	Speciese
Clostridiales species incertae sedis [meta_mOTU_v25_12463]	0.000197979	0.0152343	0.0297903	0.0146185	0.00695017	0.0228663	0.0268279	0.0192686	0.00497365	0.00370931	Speciese
Clostridiales species incertae sedis [meta_mOTU_v25_12486]	0	0.00108436	0.00302489	0.000537799	0	0.000494703	0.00438783	0.000137626	0.000542361	0.000148601	Speciese
Clostridiales species incertae sedis [meta_mOTU_v25_12494]	0	0.00327601	0.00659907	0.00282507	0.00359261	0.000500937	0.0081869	0.00130814	0.00354456	0.0026102	Speciese
Clostridiales species incertae sedis [meta_mOTU_v25_12516]	0	0.002218	0.0267963	0.000147688	0.00182268	0.000734464	0.00129004	0.013013	0.0109122	0.0277027	Speciese
Clostridiales species incertae sedis [meta_mOTU_v25_12521]	0	0.00126202	0.013243	0.000751399	0.00469587	0.000505207	0.00721411	0.00127065	0.00256177	0.000567931	Speciese
Clostridiales species incertae sedis [meta_mOTU_v25_12534]	0	0.00103303	0.00124705	0.000757791	0.00204558	0.000395674	0.00306497	0.000647333	0.000943595	0.000544766	Speciese
Clostridiales species incertae sedis [meta_mOTU_v25_12539]	0	0.00601995	0.0022245	0.000142369	0	0.000265258	0.00150677	0.000427925	0.000404655	0	Speciese
Clostridiales species incertae sedis [meta_mOTU_v25_12587]	0.000142889	0.00505093	0.0100291	0.000486342	0.00351634	0.00120018	0.00103597	0.000823019	0.00903387	0.0132313	Speciese
Clostridiales species incertae sedis [meta_mOTU_v25_12602]	0	0.000335881	0.00155805	0.00153064	0.00131615	0	0.000374093	0.0011313	0.00029287	0.00118875	Speciese
Clostridiales species incertae sedis [meta_mOTU_v25_12635]	0.000314278	0.000586773	0.000266488	0.000580379	0.00216481	0.000748373	0.00138384	0.000453489	0.00210267	0.0016514	Speciese
Clostridiales species incertae sedis [meta_mOTU_v25_12653]	0.00114367	0.000849172	0.000245963	0.000160643	0	0.00128247	0.0024394	0.000246378	0.000473432	0.000429994	Speciese
Clostridiales species incertae sedis [meta_mOTU_v25_12674]	0.000259652	0.00463473	0.000805233	0.00288873	0.00176463	0.000947161	0.00251429	0.000291469	0.000726504	0.0011306	Speciese
Clostridiales species incertae sedis [meta_mOTU_v25_12691]	0	0.00620614	0.00675019	0.00281538	0.000927988	0.00428286	0.00745829	0.00219198	0.00250136	0.00174556	Speciese
Clostridiales species incertae sedis [meta_mOTU_v25_12774]	0	0.00142446	0.010235	0.0003229	0.010973	0.000184904	0.00516275	0.00429508	0.0029868	0.00178995	Speciese
Clostridiales species incertae sedis [meta_mOTU_v25_12776]	0	0.000546638	0.00159276	0.000527633	0.000868772	0.000247352	0.00124108	0.00015673	0.000841835	0.000309001	Speciese
Clostridiales species incertae sedis [meta_mOTU_v25_12804]	0	0.0029356	0.00222849	0.00269384	0.000899341	0.000849993	0.0015985	0.000742527	0.00154884	0.000226585	Speciese
Clostridiales species incertae sedis [meta_mOTU_v25_12809]	0.000314278	0.00142331	0.000553686	0.00449271	0.00131179	0.000953654	0.0194881	0.000135829	0.00109412	0.000433313	Speciese
Clostridiales species incertae sedis [meta_mOTU_v25_12832]	0.000264205	0.0107683	0.0163308	0.00644646	0.00354882	0.00879198	0.025418	0.00266581	0.00672311	0.00646486	Speciese
Clostridiales species incertae sedis [meta_mOTU_v25_12842]	0	0.000861462	0.00154861	0.00467419	0.00168938	0.000380567	0.00165323	0.000194818	0.00461422	0	Speciese
Clostridiales species incertae sedis [meta_mOTU_v25_12974]	0	0.000562971	0.00236741	0.000907154	0.00285989	0.000627609	0.00198974	0.00155498	0.000910515	0.0034196	Speciese
Clostridiales species incertae sedis [meta_mOTU_v25_12978]	0	0.000551878	0.00138955	0.000189448	0	0.000295485	0.000377858	0.000572334	0.00073778	0.000353069	Speciese
Clostridiales species incertae sedis [meta_mOTU_v25_13047]	0.00024216	0.000209529	0	0	0.00106688	0.00519266	0	0	0.000303513	0	Speciese
Clostridiales species incertae sedis [meta_mOTU_v25_13100]	0	0.00115744	0.00184463	0.0017992	0.00176071	0.000634944	0.00138988	0.00107889	0.000671285	0.000967877	Speciese
Clostridiales species incertae sedis [meta_mOTU_v25_13147]	0	0.00123992	0.00452175	0.00272364	0.00266774	0.000540769	0.00724203	0.000855327	0.00149006	0.00259402	Speciese
Clostridiales species incertae sedis [meta_mOTU_v25_13159]	0	0.00997279	0.00858755	0.00378895	0.0109097	0.00194191	0.00554232	0.00388502	0.00391631	0.00318544	Speciese
Clostridiales species incertae sedis [meta_mOTU_v25_13176]	0	0.00328576	0.00787207	0.00514769	0.00338877	0.00323602	0.0114709	0.0045923	0.00958562	0.00475697	Speciese
Clostridiales species incertae sedis [meta_mOTU_v25_13187]	0.000223746	0.00111937	0.0016205	0.000127553	0.00126789	0.000474314	0.00249678	0.000207319	0.00128455	0.000397204	Speciese
Clostridiales species incertae sedis [meta_mOTU_v25_13280]	0.000440917	0.0012455	0.000296056	0.0043666	0.000908843	0.000719117	0.00647025	0.000267464	0.001045	0.000125543	Speciese
Clostridiales species incertae sedis [meta_mOTU_v25_13304]	0	0.0021374	0.00179743	0.00124055	0.00230328	0.00300387	0.0191365	0.000350417	0.00357804	0.000908064	Speciese
Clostridiales species incertae sedis [meta_mOTU_v25_13332]	0	0.0012687	0.000685468	0.00118266	0.0010824	0	0.00166031	0.000541347	0.000596154	0.000488629	Speciese
Clostridiales species incertae sedis [meta_mOTU_v25_13335]	0	0.00210363	0.00266156	6.84182e-05	0	0	0.00031767	0.000437616	0	0.00105275	Speciese
Clostridiales species incertae sedis [meta_mOTU_v25_13389]	0	0.000963984	0.00276685	0.000440022	0	0.000624739	0.000697765	0.000138784	0.000229615	0.00131626	Speciese
Clostridiales species incertae sedis [meta_mOTU_v25_13390]	0.000259945	0.000157187	0.000330707	0.000136497	0	0.000407439	0.000886636	0.000164839	0.000378286	0.00012319	Speciese
Clostridiales species incertae sedis [meta_mOTU_v25_13633]	0	0.000601112	0.00269121	0.00070728	0.000875618	0.000241647	0.00374282	0.000104109	0.00101249	0.000462465	Speciese
Clostridiales species incertae sedis [meta_mOTU_v25_13719]	0.000143603	0	0.000114018	0	0	0	0	0.000102489	0	0.000212113	Speciese
Clostridiales species incertae sedis [meta_mOTU_v25_13749]	0.000192792	0	0.000235964	0.000850589	0.00135362	0	0	0.00059475	0	0.00143673	Speciese
Clostridiales species incertae sedis [meta_mOTU_v25_13784]	0	0.00352599	0.0125532	0.00177122	0.00634937	0.00642916	0.00609896	0.0210343	0.00408871	0.00195765	Speciese
Clostridiales species incertae sedis [meta_mOTU_v25_13796]	0	0.00138953	0.0146222	0	0	0.0016316	0	0.00446398	0.000326345	0.000323277	Speciese
Clostridiales species incertae sedis [meta_mOTU_v25_13855]	0	0	0	0	0	0	0	0.00212499	0	0.000221864	Speciese
Clostridiales species incertae sedis [meta_mOTU_v25_13922]	0	0.00082093	0.00133113	0.00162064	0.00127755	0.00507946	0.00361475	0.000870508	0.000292065	0.00134135	Speciese
Clostridiales species incertae sedis [meta_mOTU_v25_13977]	0	0	0.000308815	0.000778341	0	0	0	0.000347592	0	0.000150306	Speciese
Clostridiales species incertae sedis [meta_mOTU_v25_14267]	0	0	0	0	0.00104111	0	0.000299137	0.000310916	0.000312888	0	Speciese
Clostridiales species incertae sedis [meta_mOTU_v25_14320]	0	0.000878029	0.000988238	0	0.00311819	0	0.00213006	0.000528105	0.00322996	0.000278891	Speciese
Clostridiales species incertae sedis [meta_mOTU_v25_14342]	0	0.00649047	0.0101895	0.00101791	0.00572485	0.000711471	0.00371507	0.00199765	0.0129405	0.000415804	Speciese
Clostridiales species incertae sedis [meta_mOTU_v25_14522]	0	0.00519013	0.00307428	0.000449819	0.00327405	0.0070025	0.013741	0.00267089	0.00388515	0.000510232	Speciese
Clostridium sp. CAG:127 [meta_mOTU_v25_12306]	0.00349896	0.000193829	0.000287245	0	0	0.00179649	0.000289423	0.00168056	0.00059525	0.000593008	Speciese
Clostridium sp. CAG:138 [meta_mOTU_v25_12233]	0	0.00499721	0.00379073	0.00111798	0.00776341	0.00252964	0.00984578	0.00307379	0.00131754	0.0017471	Speciese
Clostridium sp. CAG:226 [meta_mOTU_v25_12471]	0	0.00245555	0.00848917	0.0069279	0.00131179	0.000301183	0.00480314	0.00276943	0.000846623	0.000691252	Speciese
Clostridium sp. CAG:302 [meta_mOTU_v25_12499]	0	0.00618226	0.000440982	0.000120183	0.00380842	0	0.000201289	0.000643066	0.00534926	0.00445446	Speciese
Clostridium sp. CAG:349 [ref_mOTU_v25_07622]	0	0	0.0156538	0	0	0	0.00818439	0.0195423	0	0	Speciese
Clostridium sp. CAG:411 [ref_mOTU_v25_07623]	0.00119243	0.00298488	0.000217938	0.00461793	0.00882594	0.00621845	0.021478	0.00266353	0.00478066	0.000911893	Speciese
Clostridium sp. CAG:413 [ref_mOTU_v25_07624]	0	0.000610752	0.00413845	0.000153221	0.00349553	0.000120407	0.0025903	0.0044451	0.000355162	0.00415675	Speciese
Clostridium sp. CAG:433 [meta_mOTU_v25_12886]	0.0265337	0.00927729	0.0103461	0.000481928	0.00290273	0.0365316	0.00301723	0.00919008	0.0231664	0.0197117	Speciese
Clostridium sp. CAG:448 [meta_mOTU_v25_13567]	0	0.00183289	9.42754e-05	0	0	0.0035358	0	0	0.000169998	0	Speciese
Clostridium sp. CAG:448 [ref_mOTU_v25_07629]	0	0.00184313	9.42754e-05	0	0	0.00343133	0	0	0.000168268	0	Speciese
Clostridium sp. CAG:452 [meta_mOTU_v25_12543]	0	0.0281012	0.00130131	0.00438428	0.00154687	0.0528614	0.00454728	0.0128059	0.0128084	0.0441008	Speciese
Clostridium sp. CAG:465 [ref_mOTU_v25_07632]	0.0177702	0.0469826	0.00295705	0.00730256	0.016545	0.000159372	0.008368	0.0010815	0.00476199	0.000248093	Speciese
Clostridium sp. CAG:492 [meta_mOTU_v25_12462]	0.00268126	0.000563866	0.00415726	0.000437649	0.00166669	0.00795123	0.000391598	0.00202597	0.00612098	0.00312195	Speciese
Clostridium sp. CAG:524 [meta_mOTU_v25_12495]	0	0.00941325	0.00328048	0.00436492	0	0.000296286	0.00647664	0.0076805	0.00158294	0.00505274	Speciese
Clostridium sp. CAG:533 [meta_mOTU_v25_12421]	0	0.00220965	0.000522893	0.000214542	0.00171127	0.00648726	0.00080767	0.000906978	0.00148428	0.00317502	Speciese
Clostridium sp. CAG:533 [meta_mOTU_v25_13112]	0.000503685	0.0170482	0.000634482	0.0067495	0.0013468	0.00287048	0.00504726	0.000196655	0.00661123	0.00449327	Speciese
Clostridium sp. CAG:567 [ref_mOTU_v25_03617]	0.000324503	0.00172899	0.000444925	0.000154992	0	0.000611925	0	0.000180889	0	0.00206656	Speciese
Clostridium sp. CAG:590 [ref_mOTU_v25_07641]	0.00182788	0.000163036	0.000280994	0.00097356	0.000596999	0.00569112	0	0.00241045	0.00174999	0.00118881	Speciese
Clostridium sp. CAG:594 [meta_mOTU_v25_12571]	0.00130861	0.000598957	0.000735819	0	0.000850128	0.0019039	0.000740557	0.000417085	0.00156128	0.000767577	Speciese
Clostridium sp. CAG:609 [ref_mOTU_v25_07643]	0	0.00155063	0.00304178	0	0	0	0	0.00111357	0	0	Speciese
Clostridium sp. CAG:628 [meta_mOTU_v25_12644]	0	0.0161568	0.00387528	0	0.000493351	0	0	0.000551877	0.00242947	0.000115439	Speciese
Clostridium sp. CAG:628 [meta_mOTU_v25_12940]	0	0.00443566	0.00115948	0	0	0.000557075	0	0.000287822	0.000912552	0	Speciese
Clostridium sp. CAG:710 [ref_mOTU_v25_07648]	0	0.0120219	0.00102322	0.000126009	0	0.000204373	0.00482235	0	0.0203297	0.00632618	Speciese
Clostridium sp. CAG:780 [meta_mOTU_v25_12821]	0	0.0301358	0.0106536	0.00107222	0.000980061	0.0123095	0.00400398	0.00268398	0.00580914	0.0288239	Speciese
Clostridium sp. CAG:798 [meta_mOTU_v25_12275]	0	0.0290098	0.000683923	0.00221264	0.0027885	0.000498084	0.00825983	0.00480635	0	0.00806367	Speciese
Clostridium sp. CAG:914 [ref_mOTU_v25_07654]	0	0.0032361	0	0	0	0	0	0	0	0	Speciese
Clostridium sp. CAG:964 [ref_mOTU_v25_07656]	0	0.00664423	0	0.0129346	0.000669923	0.000128321	0.000422311	0.00103003	0.00466024	0.000692113	Speciese
Clostridium species incertae sedis [meta_mOTU_v25_12249]	0	0.00146902	0.000345609	0.00030061	0	0.00596342	0	0.000563428	0.000232476	0.00031713	Speciese
Clostridium species incertae sedis [meta_mOTU_v25_12348]	0.00884815	0.000483121	0.000315869	9.91796e-05	0.00129147	0.000384286	0.000144874	0.0012076	0.00160495	0.000497707	Speciese
Clostridium species incertae sedis [meta_mOTU_v25_12399]	0.000535004	0.000230615	0	0.000121618	0.00146064	0.00271832	0.000288535	0.000865626	0.00218985	0.000175737	Speciese
Clostridium species incertae sedis [meta_mOTU_v25_12696]	0.00198399	0.000511197	0.000359814	6.84182e-05	0.00117756	0.000940468	0.00035502	9.55538e-05	0.00122703	0.00173871	Speciese
Clostridium species incertae sedis [meta_mOTU_v25_12784]	0	0.0133683	0.00231258	0.0107781	0.00049335	0.0141482	0.00370798	0.00303651	0.00500728	0.00169381	Speciese
Clostridium species incertae sedis [meta_mOTU_v25_12802]	0	0.00687014	0	0.00018192	0	0	0.0014455	0	0	0.00520625	Speciese
Clostridium species incertae sedis [meta_mOTU_v25_13393]	0	0.00973911	0.000508868	0.000488318	0	0.00062653	0.00154719	0.000634287	0.00391425	0.00402684	Speciese
Clostridium species incertae sedis [meta_mOTU_v25_13519]	0	0.00279615	0.000401991	0.00613923	0	0.000623315	0.000664336	0.000592615	0.00018783	0	Speciese
Clostridium species incertae sedis [meta_mOTU_v25_13564]	0.00130711	0.000192769	0	0.000155453	0.00104253	0.00113196	0	0.000291188	0.000396803	0.000566725	Speciese
Clostridium species incertae sedis [meta_mOTU_v25_13702]	0.00169405	0.00100955	0.000503512	0.000361446	0.00228393	0.000643114	0.00380585	0.000471861	0.000710323	0.000112526	Speciese
Clostridium species incertae sedis [meta_mOTU_v25_13850]	0.000142889	0.00471932	0.000294993	0.000856523	0.00163772	0.00244011	0.0013524	0.000117937	0.000473549	0.00106594	Speciese
Clostridium species incertae sedis [meta_mOTU_v25_13887]	0	0.00411499	0.00100394	0.00178465	0	0.00402459	0	0.000110238	0.00130711	0	Speciese
Clostridium species incertae sedis [meta_mOTU_v25_14199]	0	0.0146365	0.00030605	0.0011976	0	0	0.000368169	0	0.00319254	0	Speciese
Clostridium species incertae sedis [meta_mOTU_v25_14271]	0	0.00201708	0.00130764	0.000588221	0	0	0.00198391	0.00486661	0.00050447	0.0067171	Speciese
Clostridium species incertae sedis [meta_mOTU_v25_14279]	0.000358607	0.00283159	0.000443405	0.000803214	0	0.00192486	0.000755715	0.000118217	0.000619517	0.00157431	Speciese
Clostridium species incertae sedis [meta_mOTU_v25_14504]	0.000508687	0.00026735	0	0	0	0.00108605	0	0.000220455	0	0.000127154	Speciese
Collinsella aerofaciens [ref_mOTU_v25_03626]	0.000161425	0	0	0	0.000308536	0.000139211	0	0.000219141	0	1.96058e-05	Speciese
Coprobacillus sp. CAG:826 [meta_mOTU_v25_12863]	0	0.00323073	0.0129496	0.000297777	0	0.00256025	0.00540405	0.00235165	0.00323463	0	Speciese
Coprococcus comes [ref_mOTU_v25_03690]	0.00029989	0.000130416	0	0	0	0.000247072	0	0	0	0.000102845	Speciese
Dehalococcoidales species incertae sedis [meta_mOTU_v25_12232]	0.00030035	0.00145057	0.00142328	0.00125958	0.0135009	0.000574562	0.000981537	0.0264745	0.000684837	0.00812782	Speciese
Dehalococcoidales species incertae sedis [meta_mOTU_v25_12257]	0.00018094	0.000725786	0	0.00181405	0.00240136	0.000685007	0.00301405	0.00174725	0.000240252	0.00117158	Speciese
Dehalococcoidales species incertae sedis [meta_mOTU_v25_12342]	0.000739716	0.00934349	0.0365959	0.28829	0.19256	0.00441326	0.020844	0.1152	0.0498861	0.149386	Speciese
Dehalococcoidales species incertae sedis [meta_mOTU_v25_13430]	0	0.0123631	0.00138025	0.0136951	0.0128488	0.0015799	0.00112047	0.00288656	0.00065934	0.00512912	Speciese
Desulfovibrio piger [ref_mOTU_v25_06282]	0	0.00019632	0.0010593	0.0011037	0.000787594	0	7.21134e-05	0.00286167	0	0.000186781	Speciese
Dorea longicatena [ref_mOTU_v25_03692]	0.000426022	0.000216367	8.42759e-05	5.87941e-05	0	0.00019426	0.000638159	0.000132303	0.000131249	0.000224552	Speciese
Eubacterium sp. [ref_mOTU_v25_03635]	0.000618094	0	9.85282e-05	3.12158e-05	0.00169074	0.00121074	0.000496564	0.000612687	0.000142011	6.90222e-05	Speciese
Eubacterium sp. CAG:581 [ref_mOTU_v25_07680]	0.017829	0.00744174	0.000114309	0.000585713	0.0431055	0.00227094	0.00327948	0.0026494	0.00119601	0.0034852	Speciese
Faecalibacterium prausnitzii [ref_mOTU_v25_06108]	0.00465372	0.000845241	0.000488711	0.0001043	0.00058088	0.00160143	0.00053345	0.000908492	0.000928118	0.000387737	Speciese
Faecalibacterium prausnitzii [ref_mOTU_v25_06109]	0.00664045	0.000855447	0.000209359	0.000121148	0.000621427	0.00183074	0.000827821	0.00100364	0.00126477	0.000361603	Speciese
Faecalibacterium prausnitzii [ref_mOTU_v25_06112]	0.00189645	0.0010317	0.000650881	0	0.000342836	0.000907047	0.000235775	0.000537532	0.000963305	0.000315126	Speciese
Faecalibacterium sp. [ref_mOTU_v25_03636]	0	0.000132533	0.000135579	0.00106076	0.00101248	0.000149357	0	3.43211e-05	0.000240524	0.000215916	Speciese
Faecalibacterium species incertae sedis [meta_mOTU_v25_12325]	0.00557443	0.00126039	0.00133729	0.000191018	0.00129208	0.000982997	0.00120659	0.000959057	0.00361751	0.00099195	Speciese
Faecalibacterium species incertae sedis [meta_mOTU_v25_12403]	0.00058749	0.000938556	0.00022013	0.000169239	0.0011095	0.00040645	0.000291709	0.00141404	0.000579604	0.00073896	Speciese
Firmicutes bacterium [ref_mOTU_v25_03677]	0	0.002637	0.000399999	0.000241097	0	0.000198165	0.00232145	0.000614073	0.00318298	0.00633473	Speciese
Firmicutes bacterium CAG:170 [ref_mOTU_v25_07733]	0	0.00116498	0.014003	0.00256442	0.00730929	0.00286678	0.0140202	0.00036609	0.00730204	0.00290533	Speciese
Firmicutes bacterium CAG:238 [ref_mOTU_v25_07735]	0	0.00109456	0.00119918	0.000504356	0.000526463	0.00031612	0.00433649	0.00117126	0.000750435	0.00158881	Speciese
Firmicutes bacterium CAG:460 [ref_mOTU_v25_07741]	0	0.00491521	0.00332654	0.000491731	0	0	0.000327938	0.00329075	0.000245523	6.35525e-05	Speciese
Firmicutes bacterium CAG:475 [ref_mOTU_v25_07742]	0	0	0	3.27169e-05	0	0	0	0.00055697	0.00538079	0.00101727	Speciese
Firmicutes bacterium CAG:534 [ref_mOTU_v25_07743]	0	0.044238	0.000822069	0.00276421	0.000446126	0.000306245	0.00111954	0.00016347	0.00211683	0	Speciese
Firmicutes bacterium CAG:555 [ref_mOTU_v25_07745]	0	0	0.001054	0	0	0	0	0.0024292	0	2.08692e-05	Speciese
Firmicutes species incertae sedis [meta_mOTU_v25_12227]	0.000246579	0.000760528	0.00109945	0.000898199	0.000853793	0	0.000551076	0.00021356	0.00195067	0.00120495	Speciese
Firmicutes species incertae sedis [meta_mOTU_v25_12231]	0	0.00693801	0.000327104	0.000456411	0	0.000254847	0.00114063	0.00378811	0.00462271	0.0224394	Speciese
Firmicutes species incertae sedis [meta_mOTU_v25_12285]	0	0.00422028	0.00203829	0.000226556	0.00231672	0.00092944	0.00725788	0.000618464	0.00439668	0.0104921	Speciese
Firmicutes species incertae sedis [meta_mOTU_v25_12769]	0	0.00726107	0.000630231	0.000113148	0.0021185	0.00022056	0.0121385	0.00177429	0.0136847	0.0183243	Speciese
Firmicutes species incertae sedis [meta_mOTU_v25_12879]	0	0.00739234	0.0103812	0.00220472	0	0	0.00408937	0.000826167	0.000802155	0.000851935	Speciese
Firmicutes species incertae sedis [meta_mOTU_v25_12975]	0	0.000427761	0.00138898	0.000136993	0	0.0018326	0.00034195	0.00127185	0	0	Speciese
Firmicutes species incertae sedis [meta_mOTU_v25_13274]	0	0.0013602	0.0135491	0.0033735	0.00109229	0	0.000927468	0.00066179	0.00124341	0.0113919	Speciese
Firmicutes species incertae sedis [meta_mOTU_v25_13897]	0.000259652	0.00056558	0.00152264	0	0	0.000589377	0.0018783	0.00375605	0	0.0041029	Speciese
Firmicutes species incertae sedis [meta_mOTU_v25_13989]	0.000313422	0.00135459	0.000181032	0.000252018	0.00116212	0	0.000343491	0	0.00127647	0.000188893	Speciese
Firmicutes species incertae sedis [meta_mOTU_v25_14146]	0	0	0	0	0	0.000358324	0.000286738	0.000361121	0.000295565	0	Speciese
Firmicutes species incertae sedis [meta_mOTU_v25_14214]	0	0.000511197	0.000455472	0.000138327	0	0.00134088	0.000368675	0.000602722	0.00107025	0.000218247	Speciese
Helicobacter macacae [ref_mOTU_v25_08047]	0.0207426	0.000403335	0.0032196	0.000595433	0.00174328	0.00158716	0.00253867	0.00407538	0.00318459	0.00293872	Speciese
Holdemanella biformis [meta_mOTU_v25_12329]	0.000285779	0.000217378	0	0	0	0.000255443	0.000273208	0.000124607	0.000664448	0	Speciese
Lachnospiraceae species incertae sedis [meta_mOTU_v25_12377]	0.00171315	0.00784287	0.00530679	0.00142701	0.00348528	0.0044886	0.00211848	0.00682742	0.0047501	0.00208041	Speciese
Lactobacillus acidophilus [ref_mOTU_v25_03347]	0.000328645	0.000463688	0.00220136	0.00279081	0.00265561	0.0021399	0.000904473	0.000231973	0.00216391	0.00371216	Speciese
Lactobacillus mucosae [ref_mOTU_v25_02550]	0	0	0	0.000157421	0	0	0.00035308	0	0	0	Speciese
Lactobacillus reuteri [ref_mOTU_v25_04085]	0.000334378	0.000335168	0.000395392	0.000189013	0.000799468	0.00206582	0.000296393	0.000108695	0.00123618	0.00216231	Speciese
Methanobrevibacter smithii [ref_mOTU_v25_03695]	0	0.000624419	0.00143146	0.00569697	0.000862605	0	0.0111657	0.00041902	0.000748674	0.00163971	Speciese
Mycoplasma sp. CAG:472 [ref_mOTU_v25_07685]	0	0.015764	0.000192778	0.00296785	0.000910066	0.00903765	0.000993687	0.0027491	0.00315763	0.0227254	Speciese
Mycoplasma sp. CAG:877 [meta_mOTU_v25_12449]	0	0.00103953	0.000808008	0	0.000960796	0.000375058	0.0283724	0.00418257	0.00174691	0.0116994	Speciese
Oscillibacter sp. [ref_mOTU_v25_04664]	0.00015544	0.00305357	0.00429881	0.00278759	0.00420701	0.00199719	0.0233995	0.00467328	0.00989798	0.0090498	Speciese
Oscillibacter sp. 57_20 [meta_mOTU_v25_12610]	0.000391689	0.00299726	0.00267328	0.00201614	0.00266918	0.00158448	0.00788097	0.00389298	0.000918862	0.00230131	Speciese
Oscillibacter species incertae sedis [meta_mOTU_v25_12353]	0	0.000756906	0.00152548	0.000244268	0.00232445	0.000170305	0.00166795	0.000964448	0.0040572	0.000408081	Speciese
Phascolarctobacterium succinatutens [ref_mOTU_v25_03700]	0.00136004	0.000770164	0.000218699	0.011727	0	0.000711864	0.00294876	0.000214963	0.000248973	0.000174292	Speciese
Prevotella copri [ref_mOTU_v25_03701]	0.0377981	0.00480359	0.00406719	0.000863766	0.0123388	0.00445636	0.00273402	0.00879051	0.00784441	0.00319839	Speciese
Prevotella sp. [ref_mOTU_v25_03648]	0	0	6.77012e-05	0.0187827	0	0.000169241	0	0.000556734	0	5.95805e-05	Speciese
Prevotella sp. CAG:474 [ref_mOTU_v25_07697]	0.00341846	0.00161438	0.00138789	0.000145931	0.00583486	0.005299	0.00113357	0.00787798	0.000933052	0.00292895	Speciese
Prevotella sp. CAG:520 [ref_mOTU_v25_00718]	0.000447976	0	0	5.09444e-05	0	0.000328514	0	0.000199491	0	0	Speciese
Prevotella species incertae sedis [meta_mOTU_v25_12332]	0.0226683	0.00170644	0.000814604	0.000277589	0.00259283	0.00432026	0.000406375	0.00810789	0.00139425	0.00126367	Speciese
Prevotella species incertae sedis [meta_mOTU_v25_12427]	0.001271	0	0	0	0	0.000134097	0	0.000325961	0	0	Speciese
Prevotella species incertae sedis [meta_mOTU_v25_12429]	0.00948196	0	0.000319763	0.00029414	0	0.000819317	0.000337201	0.00112255	0.000524069	0	Speciese
Prevotella species incertae sedis [meta_mOTU_v25_12507]	0.0112705	0.000618878	0.000561715	0.000181796	0.000898784	0.00221233	0.00103535	0.000831189	0.00196651	0.000727442	Speciese
Prevotella species incertae sedis [meta_mOTU_v25_12560]	0.00177709	0.000444779	0.00549132	0.000127767	0.00480396	0.00070037	0.00271907	0.010723	0.00272415	0.00718061	Speciese
Prevotella species incertae sedis [meta_mOTU_v25_12765]	0.0023144	0.000409859	0.000975414	0.000166493	0.00253855	0.000439957	0.00124947	0.00093058	0.00258754	0.000242946	Speciese
Prevotella species incertae sedis [meta_mOTU_v25_12791]	0.330174	0.103196	0.102953	0.00810504	0.0222242	0.272669	0.0988456	0.150596	0.0973542	0.0559117	Speciese
Prevotella species incertae sedis [meta_mOTU_v25_13594]	0.00412123	0.000252821	0.000277394	0	0	0.00178254	0	0.000755676	0.000118917	0.000399856	Speciese
Prevotellaceae species incertae sedis [meta_mOTU_v25_13276]	0.0089514	0.000252821	8.76918e-05	0.000121818	0.000905272	0.00522022	0.0003096	0.00310972	0.00057811	0.00041216	Speciese
Roseburia sp. [ref_mOTU_v25_03650]	0.00377775	0.000110327	9.3837e-05	0	0.00116746	0.0170584	8.00665e-05	0.000574205	0.000399368	0.000117498	Speciese
Roseburia species incertae sedis [meta_mOTU_v25_12366]	0.00132106	0.00271248	0.000217762	0.000293878	0.000830524	0.000924968	0.000726612	0.00341385	0.00128774	0.0012475	Speciese
Roseburia species incertae sedis [meta_mOTU_v25_13251]	0.00309976	0.00380149	0.00066891	0.000136327	0.00115163	0.00446286	0.00107024	0.0166404	0.00266019	0.00168836	Speciese
Roseburia species incertae sedis [meta_mOTU_v25_13319]	0.0016534	0.000135768	0.000156774	0	0	0.00028421	0.00057054	0.000152597	0.000612747	0.000141427	Speciese
Ruminococcaceae species incertae sedis [meta_mOTU_v25_12264]	0	0.00104307	0.000384726	0.00018132	0.00107655	0.000446243	0.000284642	0.000901629	0.00194648	0.000374793	Speciese
Ruminococcaceae species incertae sedis [meta_mOTU_v25_13471]	0.0054611	0.00118391	0.000427215	0.000173312	0.00091344	0.00229963	0.00116942	0.000530109	0.0010061	0.000400986	Speciese
Ruminococcus bromii [ref_mOTU_v25_00853]	0.00131084	0.000103606	0.000219113	0	0.000576076	0.000934439	0.000436268	0.000685782	0	9.73799e-05	Speciese
Ruminococcus sp. [ref_mOTU_v25_03651]	0.000158006	0.00135964	0.00145342	0.00335728	0.00579988	0.000322506	0.00916281	0.00199286	0.0010754	0.00295161	Speciese
Ruminococcus sp. CAG:177 [meta_mOTU_v25_12235]	0	0.0021365	0.00980644	0.00141184	0.00229622	0.00173123	0.0061439	0.000258774	0.00598183	0.00352461	Speciese
Ruminococcus sp. CAG:177 [meta_mOTU_v25_12400]	0	0.0340923	0.101554	0.0182734	0.0426403	0.00492108	0.0263124	0.0191356	0.0769467	0.0288729	Speciese
Ruminococcus sp. CAG:254 [meta_mOTU_v25_12276]	0.000409104	0.000814683	0.000299628	0.00197185	0	0.000836453	0.00390207	0.00130562	0	0.000290937	Speciese
Ruminococcus sp. CAG:563 [ref_mOTU_v25_03654]	0	0.000329922	0.000718302	0.0022578	0.00176463	0.000340378	0.00155357	0.000502732	0.000330983	0.000322322	Speciese
Ruminococcus sp. CAG:624 [ref_mOTU_v25_07712]	0	0	0.000511838	6.38835e-05	0	0	0	0.000162722	0	0	Speciese
Ruminococcus species incertae sedis [meta_mOTU_v25_13712]	0	0	0	0	0	0.00110757	0	0	0	0	Speciese
Sphaerochaeta sp. Phil3 [ref_mOTU_v25_10526]	0	0	0.000651398	0.00221742	0.000403336	0.000490267	0.000869242	0.00123505	0.00111907	0.000266333	Speciese
Succinivibrio dextrinosolvens [meta_mOTU_v25_12719]	0.102299	0.00283161	0.00366096	0.00148122	0.00608965	0.0231144	0.00244523	0.037781	0.0167028	0.0292807	Speciese
Succinivibrionaceae sp. [ref_mOTU_v25_03663]	0.147044	0.0025001	0.0023657	0.00126332	0.0033748	0.0280838	0.00253441	0.0396835	0.0239209	0.0379036	Speciese
Treponema berlinense [ref_mOTU_v25_10707]	0	0.00579207	0.00070422	0.000908097	0	0.0489192	0.000291709	0.00469505	0	0.000656159	Speciese
Treponema succinifaciens [ref_mOTU_v25_11997]	0	0	0.0174474	0.0185746	0.00129888	0	0.00022128	0.00149743	0.000281994	0.00217163	Speciese
unclassified	0.0434622	0.0656949	0.0693768	0.025894	0.0702226	0.0740003	0.0721438	0.0714931	0.0659041	0.0857527	Speciese
unclassified	0.0434622	0.0656949	0.0693768	0.025894	0.0702226	0.0740003	0.0721438	0.0714931	0.0659041	0.0857527	Class
unclassified	0.0434622	0.0656949	0.0693768	0.025894	0.0702226	0.0740003	0.0721438	0.0714931	0.0659041	0.0857527	Family
unclassified	0.0434622	0.0656949	0.0693768	0.025894	0.0702226	0.0740003	0.0721438	0.0714931	0.0659041	0.0857527	Genus
unclassified	0.0434622	0.0656949	0.0693768	0.025894	0.0702226	0.0740003	0.0721438	0.0714931	0.0659041	0.0857527	Order
unclassified	0.0434622	0.0656949	0.0693768	0.025894	0.0702226	0.0740003	0.0721438	0.0714931	0.0659041	0.0857527	Phylum

## Sheet: C.Taxa_of_Hum
Taxonomy	SRR341619	SRR341620	SRR341621	SRR341622	SRR341624	SRR341625	SRR341626	SRR341627	SRR341628	Clades
group	Hum	Hum	Hum	Hum	Hum	Hum	Hum	Hum	Hum	-
[Clostridium] asparagiforme/lavalense [ref_mOTU_v25_06317]	0	0	0	0.000574713	0.000511902	0	0.000649773	0.00106553	0	Speciese
[Clostridium] citroniae [ref_mOTU_v25_04828]	0	0.000356888	0	0	0.00230356	0.000198847	0.000649773	0.00106553	0.000452899	Speciese
[Clostridium] clostridioforme [ref_mOTU_v25_03443]	0	0	0	0	0.000255951	0	0	0	0.000452899	Speciese
[Clostridium] clostridioforme/bolteae [ref_mOTU_v25_03442]	0.000536769	0	0.000533618	0.00172414	0.00230356	0	0.00259909	0.00106553	0.000452899	Speciese
[Clostridium] glycyrrhizinilyticum [ref_mOTU_v25_03672]	0	0	0	0.000574713	0	0	0.000649773	0	0.000452899	Speciese
[Clostridium] leptum [ref_mOTU_v25_03688]	0	0.000356888	0	0	0	0.000198847	0	0	0	Speciese
[Clostridium] saccharolyticum [ref_mOTU_v25_03601]	0.000536769	0	0	0	0	0.000198847	0	0	0	Speciese
[Clostridium] scindens [ref_mOTU_v25_03437]	0	0	0	0.000574713	0.000255951	0	0	0	0.000452899	Speciese
[Clostridium] symbiosum [ref_mOTU_v25_04652]	0	0	0	0.000574713	0.00486307	0.000198847	0.00259909	0.000532765	0	Speciese
[Eubacterium] eligens [ref_mOTU_v25_02375]	0.00590446	0.00249822	0.00106724	0.00172414	0	0.00198847	0	0.00532765	0.00226449	Speciese
[Eubacterium] eligens [ref_mOTU_v25_02376]	0.00429415	0.0231977	0.0128068	0.0045977	0	0.00676079	0	0.0388918	0.00498188	Speciese
[Eubacterium] hallii [ref_mOTU_v25_03632]	0.00107354	0.000356888	0.000533618	0	0	0.000198847	0	0.000532765	0	Speciese
[Eubacterium] rectale [ref_mOTU_v25_03657]	0.0236178	0.0278373	0.00800427	0	0.000255951	0.000397693	0	0	0.272192	Speciese
[Eubacterium] siraeum [ref_mOTU_v25_02370]	0.0085883	0.0281941	0.000533618	0.000574713	0	0	0	0	0	Speciese
[Ruminococcus] gnavus [ref_mOTU_v25_01594]	0	0	0	0.00114943	0.00563092	0	0.00194932	0	0.000452899	Speciese
[Ruminococcus] torques [ref_mOTU_v25_03659]	0.000536769	0	0.00320171	0.00114943	0	0.000198847	0	0	0.000452899	Speciese
[Ruminococcus] torques [ref_mOTU_v25_03660]	0.000536769	0.000356888	0.00160085	0.00229885	0	0.00059654	0	0	0.0013587	Speciese
[Ruminococcus] torques [ref_mOTU_v25_03703]	0.000536769	0.000356888	0.000533618	0.00114943	0	0.000198847	0.0110461	0.00106553	0.00498188	Speciese
Acinetobacter sp. [ref_mOTU_v25_03673]	0.00107354	0	0.00693703	0.00287356	0	0	0	0.0117208	0	Speciese
Adlercreutzia equolifaciens [ref_mOTU_v25_08094]	0.000536769	0.000356888	0.000533618	0	0	0	0	0	0	Speciese
Akkermansia muciniphila [ref_mOTU_v25_03591]	0.000536769	0	0	0	0	0.000198847	0	0	0	Speciese
Alistipes finegoldii [ref_mOTU_v25_03682]	0	0.000356888	0	0	0.000255951	0.000198847	0.00974659	0	0.000905797	Speciese
Alistipes finegoldii/onderdonkii [ref_mOTU_v25_03069]	0.000536769	0.000356888	0.0122732	0	0	0.000198847	0	0	0.000905797	Speciese
Alistipes ihumii [ref_mOTU_v25_07379]	0.000536769	0.000356888	0	0	0	0	0	0	0	Speciese
Alistipes indistinctus [ref_mOTU_v25_11860]	0	0.000356888	0	0	0.000255951	0.000198847	0.00194932	0	0.000452899	Speciese
Alistipes putredinis [ref_mOTU_v25_03683]	0.000536769	0.0028551	0.0330843	0.00344828	0	0.000795387	0	0	0	Speciese
Alistipes shahii [ref_mOTU_v25_01014]	0.000536769	0.00107066	0.00320171	0	0.000255951	0.00119308	0.014295	0.0191795	0.000452899	Speciese
Alistipes species incertae sedis [meta_mOTU_v25_14198]	0.000536769	0	0	0	0	0	0.0123457	0	0	Speciese
Allisonella histaminiformans [ref_mOTU_v25_10689]	0	0	0	0	0	0.000198847	0.000649773	0	0	Speciese
Anaerostipes hadrus [ref_mOTU_v25_00856]	0.000536769	0.000356888	0	0.00114943	0	0.000198847	0	0.00319659	0.00181159	Speciese
Anaerostipes hadrus [ref_mOTU_v25_00857]	0.000536769	0.000713776	0.000533618	0.000574713	0	0.000198847	0	0.00213106	0.0013587	Speciese
Anaerotruncus colihominis [ref_mOTU_v25_03438]	0	0	0	0	0	0	0.000649773	0.0015983	0	Speciese
Bacteria sp. [ref_mOTU_v25_00077]	0.000536769	0	0	0	0.000255951	0.000198847	0	0	0	Speciese
Bacteria sp. [ref_mOTU_v25_03594]	0	0.000356888	0.000533618	0	0	0	0	0	0	Speciese
Bacteria species incertae sedis [meta_mOTU_v25_13483]	0.000536769	0	0	0.000574713	0	0	0	0	0	Speciese
Bacteria;Actinobacteria	0.00268817	0.00107488	0.000534759	0.000576037	0.0161373	0.000198965	0.00324886	0.000532765	0.000454339	Phylum
Bacteria;Actinobacteria;Actinobacteria	0.00162338	0.000373552	0	0	0.0167251	0	0.0027933	0	0	Class
Bacteria;Actinobacteria;Actinobacteria;Bifidobacteriales	0.00108225	0	0	0	0.0167341	0	0.0027933	0	0	Order
Bacteria;Actinobacteria;Actinobacteria;Bifidobacteriales;Bifidobacteriaceae	0.000620155	0	0	0	0.00850247	0	0.00155461	0	0	Family
Bacteria;Actinobacteria;Actinobacteria;Bifidobacteriales;Bifidobacteriaceae;Bifidobacterium	0.00130208	0	0	0	0.0170846	0	0.00311284	0	0	Genus
Bacteria;Actinobacteria;Coriobacteriia	0.00108225	0.000747105	0.000542594	0.000607533	0.00026976	0.000204834	0.000698324	0.000551268	0.000480538	Class
Bacteria;Actinobacteria;Coriobacteriia;Coriobacteriales	0.000541126	0.000373552	0	0	0	0.000204834	0	0.000551268	0.000480538	Order
Bacteria;Actinobacteria;Coriobacteriia;Coriobacteriales;Coriobacteriaceae	0.000310078	0.000282326	0	0	0	0.000116795	0	0	0.00030003	Family
Bacteria;Actinobacteria;Coriobacteriia;Coriobacteriales;Coriobacteriaceae;Collinsella	0.000651042	0.000597729	0	0	0	0.000234907	0	0	0.000732064	Genus
Bacteria;Actinobacteria;Coriobacteriia;Eggerthellales	0.000541126	0.000373552	0.000542594	0.000607533	0.000269906	0	0.000698324	0	0	Order
Bacteria;Actinobacteria;Coriobacteriia;Eggerthellales;Eggerthellaceae	0.000310078	0.000282326	0.000326158	0.000314367	0.000137137	0	0.000388651	0	0	Family
Bacteria;Actinobacteria;Coriobacteriia;Eggerthellales;Eggerthellaceae;Adlercreutzia	0.000651042	0.000597729	0.000660502	0	0	0	0	0	0	Genus
Bacteria;Actinobacteria;Coriobacteriia;Eggerthellales;Eggerthellaceae;Eggerthella	0	0	0	0.000629723	0	0	0.00077821	0	0	Genus
Bacteria;Bacteroidetes	0.576882	0.30885	0.486631	0.710253	0.780482	0.515917	0.747238	0.584443	0.336665	Phylum
Bacteria;Bacteroidetes;Bacteroidia	0.580628	0.322002	0.49376	0.749089	0.821958	0.531135	0.803073	0.604741	0.356079	Class
Bacteria;Bacteroidetes;Bacteroidia;Bacteroidales	0.580628	0.322002	0.49376	0.749089	0.822402	0.531135	0.803073	0.604741	0.356079	Order
Bacteria;Bacteroidetes;Bacteroidia;Bacteroidales;Bacteroidaceae	0.128372	0.136646	0.245597	0.376611	0.41045	0.0915674	0.379324	0.311139	0.133813	Family
Bacteria;Bacteroidetes;Bacteroidia;Bacteroidales;Bacteroidaceae;Bacteroides	0.234375	0.289301	0.497358	0.754408	0.824745	0.183932	0.758755	0.636132	0.326501	Genus
Bacteria;Bacteroidetes;Bacteroidia;Bacteroidales;Barnesiellaceae	0	0.00282326	0.000326158	0.0009431	0	0.000350385	0	0	0	Family
Bacteria;Bacteroidetes;Bacteroidia;Bacteroidales;Barnesiellaceae;Barnesiella	0	0.00119546	0.000660502	0	0	0.000469814	0	0	0	Genus
Bacteria;Bacteroidetes;Bacteroidia;Bacteroidales;Barnesiellaceae;Coprobacter	0	0.00478183	0	0.00188917	0	0.000234907	0	0	0	Genus
Bacteria;Bacteroidetes;Bacteroidia;Bacteroidales;Odoribacteraceae	0.00155039	0.00479955	0.00228311	0.000628733	0	0.000583976	0.00699572	0.0056005	0.00150015	Family
Bacteria;Bacteroidetes;Bacteroidia;Bacteroidales;Odoribacteraceae;Butyricimonas	0.000651042	0.00119546	0.001321	0.000629723	0	0.000234907	0	0.00381679	0.000732064	Genus
Bacteria;Bacteroidetes;Bacteroidia;Bacteroidales;Odoribacteraceae;Culturomica	0.000651042	0.00119546	0	0	0	0	0	0	0	Genus
Bacteria;Bacteroidetes;Bacteroidia;Bacteroidales;Odoribacteraceae;Odoribacter	0.00195312	0.00777047	0.00330251	0.000629723	0	0.000939629	0.0140078	0.00763359	0.00292826	Genus
Bacteria;Bacteroidetes;Bacteroidia;Bacteroidales;Prevotellaceae	0.195659	0.00649351	0.000652316	0.0009431	0	0.204041	0	0	0.0792079	Family
Bacteria;Bacteroidetes;Bacteroidia;Bacteroidales;Prevotellaceae;Paraprevotella	0.0104167	0.01315	0	0	0	0	0	0	0.0161054	Genus
Bacteria;Bacteroidetes;Bacteroidia;Bacteroidales;Prevotellaceae;Prevotella	0.400391	0.000597729	0.001321	0.00125945	0	0.410383	0	0	0.17716	Genus
Bacteria;Bacteroidetes;Bacteroidia;Bacteroidales;Rikenellaceae	0.00186047	0.00451722	0.0300065	0.0028293	0.00041141	0.00151834	0.0233191	0.011201	0.00180018	Family
Bacteria;Bacteroidetes;Bacteroidia;Bacteroidales;Rikenellaceae;Alistipes	0.00390625	0.00956366	0.0607662	0.00566751	0.000826674	0.00305379	0.0466926	0.0229008	0.00439239	Genus
Bacteria;Bacteroidetes;Bacteroidia;Bacteroidales;Tannerellaceae	0.00217054	0.0095991	0.0153294	0.00440113	0.00644542	0.00385424	0.00932763	0.00248911	0.00480048	Family
Bacteria;Bacteroidetes;Bacteroidia;Bacteroidales;Tannerellaceae;Parabacteroides	0.00455729	0.0203228	0.0310436	0.00881612	0.0129512	0.00775194	0.018677	0.00508906	0.011713	Genus
Bacteria;Firmicutes	0.355914	0.649588	0.455615	0.254032	0.157275	0.405491	0.14295	0.34683	0.637892	Phylum
Bacteria;Firmicutes;Bacilli	0.00162338	0.000747105	0.00108519	0.0018226	0.00890208	0.00102417	0.000698324	0.00110254	0.00144161	Class
Bacteria;Firmicutes;Bacilli;Lactobacillales	0.00108225	0.000747105	0.00108519	0.0018226	0.00863698	0.00102417	0.000698324	0.00110254	0.00144161	Order
Bacteria;Firmicutes;Bacilli;Lactobacillales;Lactobacillaceae	0.000310078	0	0.000326158	0	0	0	0	0	0.00030003	Family
Bacteria;Firmicutes;Bacilli;Lactobacillales;Lactobacillaceae;Lactobacillus	0.000651042	0	0.000660502	0	0	0	0	0	0.000732064	Genus
Bacteria;Firmicutes;Bacilli;Lactobacillales;Streptococcaceae	0.000310078	0.000564653	0.000326158	0.0009431	0.00356555	0.000583976	0.000388651	0.000622278	0.00060006	Family
Bacteria;Firmicutes;Bacilli;Lactobacillales;Streptococcaceae;Streptococcus	0.000651042	0.00119546	0.000660502	0.00188917	0.00688895	0.00117454	0.00077821	0.00127226	0.00146413	Genus
Bacteria;Firmicutes;Clostridia	0.335498	0.633171	0.440586	0.139125	0.109523	0.377304	0.125698	0.321389	0.601634	Class
Bacteria;Firmicutes;Clostridia;Clostridiales	0.335498	0.633171	0.440586	0.139125	0.109582	0.377304	0.125698	0.321389	0.601634	Order
Bacteria;Firmicutes;Clostridia;Clostridiales;Clostridiaceae	0.0424806	0.0700169	0.0221787	0.00723043	0.00137137	0.0589815	0.00272056	0.0102676	0.0234023	Family
Bacteria;Firmicutes;Clostridia;Clostridiales;Clostridiaceae;Butyricicoccus	0.00260417	0.0041841	0.000660502	0.000629723	0	0.00140944	0.00311284	0.00318066	0.00439239	Genus
Bacteria;Firmicutes;Clostridia;Clostridiales;Clostridiaceae;Clostridium	0.0865885	0.144053	0.0442536	0.0138539	0.00110223	0.117219	0.00077821	0.0171756	0.0512445	Genus
Bacteria;Firmicutes;Clostridia;Clostridiales;Clostridiaceae;Hungatella	0	0	0	0	0.00165335	0	0.00155642	0.000636132	0.00146413	Genus
Bacteria;Firmicutes;Clostridia;Clostridiales;Eubacteriaceae	0.00930233	0.0454545	0.0143509	0.0084879	0.00685683	0.0394768	0.00310921	0.0432483	0.0192019	Family
Bacteria;Firmicutes;Clostridia;Clostridiales;Eubacteriaceae;Eubacterium	0.0195312	0.0962343	0.0290621	0.0170025	0.0137779	0.0793986	0.00622568	0.0884224	0.0468521	Genus
Bacteria;Firmicutes;Clostridia;Clostridiales;Lachnospiraceae	0.0362791	0.0573123	0.043379	0.0311223	0.0270159	0.0153002	0.0338127	0.0255134	0.253225	Family
Bacteria;Firmicutes;Clostridia;Clostridiales;Lachnospiraceae;Anaerostipes	0.00130208	0.00179319	0.000660502	0.00188917	0.00165335	0.000469814	0	0.00636132	0.00512445	Genus
Bacteria;Firmicutes;Clostridia;Clostridiales;Lachnospiraceae;Blautia	0.00651042	0.00717274	0.0151915	0.0163728	0.0124001	0.00446324	0.0202335	0.00381679	0.0409956	Genus
Bacteria;Firmicutes;Clostridia;Clostridiales;Lachnospiraceae;Coprococcus	0.00325521	0.00358637	0.00264201	0.00125945	0.000275558	0.00117454	0.00077821	0	0.00146413	Genus
Bacteria;Firmicutes;Clostridia;Clostridiales;Lachnospiraceae;Dorea	0.00455729	0.00179319	0.001321	0.00314861	0.00358225	0.00234907	0.00311284	0.00254453	0.0139092	Genus
Bacteria;Firmicutes;Clostridia;Clostridiales;Lachnospiraceae;Faecalicatena	0	0.000597729	0	0	0	0	0	0.000636132	0	Genus
Bacteria;Firmicutes;Clostridia;Clostridiales;Lachnospiraceae;Fusicatenibacter	0.000651042	0.00119546	0.000660502	0.00125945	0	0.000469814	0.00077821	0.00318066	0	Genus
Bacteria;Firmicutes;Clostridia;Clostridiales;Lachnospiraceae;Lachnoclostridium	0.00130208	0.000597729	0.000660502	0.00440806	0.0112979	0.000704722	0.00856031	0.00445293	0.00366032	Genus
Bacteria;Firmicutes;Clostridia;Clostridiales;Lachnospiraceae;Lachnospira	0.000651042	0.00119546	0	0	0	0.000234907	0	0.000636132	0.000732064	Genus
Bacteria;Firmicutes;Clostridia;Clostridiales;Lachnospiraceae;Roseburia	0.0279948	0.0526001	0.0561427	0.029597	0.0126757	0.0194973	0.0264591	0.0254453	0.112006	Genus
Bacteria;Firmicutes;Clostridia;Clostridiales;Lachnospiraceae;Tyzzerella	0	0	0	0.00188917	0.00358225	0	0.00544747	0.000636132	0	Genus
Bacteria;Firmicutes;Clostridia;Clostridiales;NA;Clostridium	0	0.00179319	0	0.00125945	0	0	0	0	0	Genus
Bacteria;Firmicutes;Clostridia;Clostridiales;NA;Intestinimonas	0	0	0.000660502	0	0	0	0	0	0.000732064	Genus
Bacteria;Firmicutes;Clostridia;Clostridiales;Oscillospiraceae	0.00527132	0.00846979	0.0130463	0.00157183	0	0.00619014	0	0.00373367	0.00090009	Family
Bacteria;Firmicutes;Clostridia;Clostridiales;Oscillospiraceae;Oscillibacter	0.0110677	0.0179319	0.0264201	0.00314861	0	0.0124501	0	0.00763359	0.00219619	Genus
Bacteria;Firmicutes;Clostridia;Clostridiales;Peptostreptococcaceae	0.000310078	0	0.000652316	0.000314367	0.000959956	0.000467181	0.000777303	0.000933416	0.00030003	Family
Bacteria;Firmicutes;Clostridia;Clostridiales;Peptostreptococcaceae;Intestinibacter	0.000651042	0	0.000660502	0.000629723	0.000551116	0	0.00077821	0.000636132	0	Genus
Bacteria;Firmicutes;Clostridia;Clostridiales;Peptostreptococcaceae;Romboutsia	0	0	0.000660502	0	0.000826674	0.000939629	0.00077821	0.000636132	0.000732064	Genus
Bacteria;Firmicutes;Clostridia;Clostridiales;Ruminococcaceae	0.0533333	0.143704	0.0841487	0.0138321	0.0143993	0.0327026	0.016712	0.0678283	0.0459046	Family
Bacteria;Firmicutes;Clostridia;Clostridiales;Ruminococcaceae;Anaerotruncus	0	0	0.000660502	0	0	0	0.00077821	0.0019084	0.000732064	Genus
Bacteria;Firmicutes;Clostridia;Clostridiales;Ruminococcaceae;Faecalibacterium	0.0670573	0.180514	0.142668	0.018262	0.0146046	0.030303	0.00077821	0.0547074	0.0658858	Genus
Bacteria;Firmicutes;Clostridia;Clostridiales;Ruminococcaceae;Flavonifractor	0	0	0.001321	0.00125945	0.0135023	0	0.014786	0.019084	0.00146413	Genus
Bacteria;Firmicutes;Clostridia;Clostridiales;Ruminococcaceae;Phocea	0	0	0	0.000629723	0	0.000469814	0	0	0.000732064	Genus
Bacteria;Firmicutes;Clostridia;Clostridiales;Ruminococcaceae;Ruminococcus	0.0292969	0.0633592	0.011889	0.00629723	0.000551116	0.0267794	0.0155642	0.0235369	0.0417277	Genus
Bacteria;Firmicutes;Clostridia;Clostridiales;Ruminococcaceae;Ruthenibacterium	0.000651042	0	0	0.000629723	0.000275558	0.000234907	0.00155642	0.000636132	0.000732064	Genus
Bacteria;Firmicutes;Erysipelotrichia	0.00108225	0	0	0.00121507	0.0040464	0.00614502	0.00209497	0.00110254	0.00144161	Class
Bacteria;Firmicutes;Erysipelotrichia;Erysipelotrichales	0.00108225	0	0	0.00121507	0.00404858	0.00614502	0.00209497	0.00110254	0.00144161	Order
Bacteria;Firmicutes;Erysipelotrichia;Erysipelotrichales;Erysipelotrichaceae	0.000620155	0	0	0.000628733	0.00205705	0.00350385	0.00116595	0.000622278	0.00090009	Family
Bacteria;Firmicutes;Erysipelotrichia;Erysipelotrichales;Erysipelotrichaceae;Dielma	0.000651042	0	0	0	0	0.000234907	0	0	0	Genus
Bacteria;Firmicutes;Erysipelotrichia;Erysipelotrichales;Erysipelotrichaceae;Erysipelatoclostridium	0	0	0	0	0.00385781	0	0.00077821	0	0	Genus
Bacteria;Firmicutes;Erysipelotrichia;Erysipelotrichales;Erysipelotrichaceae;Holdemania	0	0	0	0.000629723	0	0.000469814	0.00155642	0.00127226	0.000732064	Genus
Bacteria;Firmicutes;Erysipelotrichia;Erysipelotrichales;Erysipelotrichaceae;Turicibacter	0.000651042	0	0	0	0	0	0	0	0.000732064	Genus
Bacteria;Firmicutes;Negativicutes	0.0140693	0.00149421	0.00705372	0.0741191	0.00107904	0.0210979	0.00628492	0.00275634	0.0177799	Class
Bacteria;Firmicutes;Negativicutes;Acidaminococcales	0.0140693	0	0.00542594	0	0	0.0141336	0.00418994	0	0	Order
Bacteria;Firmicutes;Negativicutes;Acidaminococcales;Acidaminococcaceae	0.00806202	0	0.00326158	0	0	0.00805886	0.00233191	0	0	Family
Bacteria;Firmicutes;Negativicutes;Acidaminococcales;Acidaminococcaceae;Phascolarctobacterium	0.016276	0	0.00660502	0	0	0.0162086	0.00466926	0	0	Genus
Bacteria;Firmicutes;Negativicutes;Selenomonadales	0	0	0	0.0722965	0	0.00634986	0	0	0	Order
Bacteria;Firmicutes;Negativicutes;Selenomonadales;Selenomonadaceae	0	0	0	0.0374096	0	0.00362065	0	0	0	Family
Bacteria;Firmicutes;Negativicutes;Selenomonadales;Selenomonadaceae;Megamonas	0	0	0	0.074937	0	0.00728212	0	0	0	Genus
Bacteria;Firmicutes;Negativicutes;Veillonellales	0	0.00149421	0.00162778	0.0018226	0.00107962	0.000614502	0.00209497	0.00275634	0.0177799	Order
Bacteria;Firmicutes;Negativicutes;Veillonellales;Veillonellaceae	0	0.00112931	0.000978474	0.0009431	0.000548546	0.000350385	0.00116595	0.00155569	0.0111011	Family
Bacteria;Firmicutes;Negativicutes;Veillonellales;Veillonellaceae;Allisonella	0	0	0	0	0	0.000234907	0.00077821	0	0	Genus
Bacteria;Firmicutes;Negativicutes;Veillonellales;Veillonellaceae;Dialister	0	0	0.00198151	0.00125945	0	0	0.00077821	0.0019084	0.0270864	Genus
Bacteria;Firmicutes;Negativicutes;Veillonellales;Veillonellaceae;Veillonella	0	0.00239091	0	0.000629723	0.00110223	0.000469814	0.00077821	0.00127226	0	Genus
Bacteria;Fusobacteria	0.00537634	0	0.000534759	0.00115207	0.0171619	0	0.00779727	0	0.000454339	Phylum
Bacteria;Fusobacteria;Fusobacteriia	0.00541126	0	0.000542594	0.00121507	0.0180739	0	0.00837989	0	0.000480538	Class
Bacteria;Fusobacteria;Fusobacteriia;Fusobacteriales	0.00541126	0	0.000542594	0.00121507	0.0180837	0	0.00837989	0	0.000480538	Order
Bacteria;Fusobacteria;Fusobacteriia;Fusobacteriales;Fusobacteriaceae	0.00310078	0	0.000326158	0.000628733	0.00918815	0	0.00466382	0	0.00030003	Family
Bacteria;Fusobacteria;Fusobacteriia;Fusobacteriales;Fusobacteriaceae;Fusobacterium	0.00651042	0	0.000660502	0.00125945	0.0184624	0	0.00933852	0	0.000732064	Genus
Bacteria;Proteobacteria	0.0241935	0.0132569	0.0229947	0.0218894	0.0122951	0.0362117	0.0818713	0.0426212	0.0081781	Phylum
Bacteria;Proteobacteria;Betaproteobacteria	0.0178571	0	0.00976668	0.0109356	0.00053952	0.0151577	0.0265363	0.0248071	0.00192215	Class
Bacteria;Proteobacteria;Betaproteobacteria;Burkholderiales	0.0178571	0	0.00976668	0.0109356	0.000269906	0.0151577	0.0265363	0.0248071	0.00192215	Order
Bacteria;Proteobacteria;Betaproteobacteria;Burkholderiales;Comamonadaceae	0.000620155	0	0	0	0	0.000116795	0	0	0.00030003	Family
Bacteria;Proteobacteria;Betaproteobacteria;Burkholderiales;Comamonadaceae;Comamonas	0.000651042	0	0	0	0	0.000234907	0	0	0.000732064	Genus
Bacteria;Proteobacteria;Betaproteobacteria;Burkholderiales;Sutterellaceae	0.00899225	0	0.000978474	0	0.000137137	0.00420463	0	0.00124456	0.00090009	Family
Bacteria;Proteobacteria;Betaproteobacteria;Burkholderiales;Sutterellaceae;Parasutterella	0	0	0.000660502	0	0.000275558	0.00751703	0	0	0	Genus
Bacteria;Proteobacteria;Betaproteobacteria;Burkholderiales;Sutterellaceae;Sutterella	0.000651042	0	0.000660502	0	0	0.000939629	0	0.00254453	0.00219619	Genus
Bacteria;Proteobacteria;Deltaproteobacteria	0.0021645	0.000747105	0.00108519	0.00121507	0	0.000409668	0.00349162	0.00385888	0.000961076	Class
Bacteria;Proteobacteria;Deltaproteobacteria;Desulfovibrionales	0.0021645	0.000747105	0.00108519	0.00121507	0	0.000409668	0.00349162	0.00385888	0.000961076	Order
Bacteria;Proteobacteria;Deltaproteobacteria;Desulfovibrionales;Desulfovibrionaceae	0.00124031	0.000564653	0.000652316	0.000628733	0	0.00023359	0.00194326	0.00217797	0.00060006	Family
Bacteria;Proteobacteria;Deltaproteobacteria;Desulfovibrionales;Desulfovibrionaceae;Bilophila	0.00130208	0.00119546	0.001321	0.00125945	0	0.000234907	0.00389105	0.00381679	0.00146413	Genus
Bacteria;Proteobacteria;Deltaproteobacteria;Desulfovibrionales;Desulfovibrionaceae;Desulfovibrio	0.00130208	0	0	0	0	0.000234907	0	0.000636132	0	Genus
Bacteria;Proteobacteria;Gammaproteobacteria	0.00378788	0.000373552	0.0113945	0.00789793	0.0013488	0.00409668	0.00209497	0.0132304	0.000480538	Class
Bacteria;Proteobacteria;Gammaproteobacteria;Enterobacterales	0	0	0.000542594	0.00121507	0.000809717	0.00143384	0.00209497	0	0.000480538	Order
Bacteria;Proteobacteria;Gammaproteobacteria;Enterobacterales;Enterobacteriaceae	0	0	0	0.000314367	0.000274273	0.000700771	0.000777303	0	0	Family
Bacteria;Proteobacteria;Gammaproteobacteria;Pasteurellales	0.00270563	0.000373552	0.00108519	0.0036452	0	0.00266284	0	0.00110254	0	Order
Bacteria;Proteobacteria;Gammaproteobacteria;Pasteurellales;Pasteurellaceae	0.00155039	0.000282326	0.000652316	0.0018862	0	0.00151834	0	0.000622278	0	Family
Bacteria;Proteobacteria;Gammaproteobacteria;Pasteurellales;Pasteurellaceae;Haemophilus	0.00195312	0.000597729	0.000660502	0.00314861	0	0.00211416	0	0.000636132	0	Genus
Bacteria;Proteobacteria;Gammaproteobacteria;Pseudomonadales	0.00108225	0	0.00976668	0.00303767	0	0	0	0.0121279	0	Order
Bacteria;Proteobacteria;Gammaproteobacteria;Pseudomonadales;Moraxellaceae	0.000620155	0	0.00587084	0.00157183	0	0	0	0.00684505	0	Family
Bacteria;Proteobacteria;Gammaproteobacteria;Pseudomonadales;Moraxellaceae;Acinetobacter	0.00130208	0	0.011889	0.00314861	0	0	0	0.0139949	0	Genus
Bacteria;Tenericutes	0	0.00465783	0.000534759	0	0	0	0	0	0	Phylum
Bacteria;Tenericutes;Mollicutes	0	0.00485618	0.000542594	0	0	0	0	0	0	Class
Bacteria;Tenericutes;Mollicutes;Mycoplasmatales	0	0.00485618	0.000542594	0	0	0	0	0	0	Order
Bacteria;Tenericutes;Mollicutes;Mycoplasmatales;Mycoplasmataceae	0	0.00367024	0.000326158	0	0	0	0	0	0	Family
Bacteria;Tenericutes;Mollicutes;Mycoplasmatales;Mycoplasmataceae;Mycoplasma	0	0.00777047	0.000660502	0	0	0	0	0	0	Genus
Bacteria;Verrucomicrobia	0.000537634	0	0	0	0	0.000198965	0	0	0.000908678	Phylum
Bacteria;Verrucomicrobia;Verrucomicrobiae	0.000541126	0	0	0	0	0.000204834	0	0	0.000961076	Class
Bacteria;Verrucomicrobia;Verrucomicrobiae;Verrucomicrobiales	0.000541126	0	0	0	0	0.000204834	0	0	0.000961076	Order
Bacteria;Verrucomicrobia;Verrucomicrobiae;Verrucomicrobiales;Akkermansiaceae	0.000310078	0	0	0	0	0.000116795	0	0	0.00060006	Family
Bacteria;Verrucomicrobia;Verrucomicrobiae;Verrucomicrobiales;Akkermansiaceae;Akkermansia	0.000651042	0	0	0	0	0.000234907	0	0	0.00146413	Genus
bacterium LF-3 [ref_mOTU_v25_03628]	0.000536769	0.00356888	0.00160085	0.00114943	0	0.000397693	0	0	0.00317029	Speciese
Bacteroidaceae species incertae sedis [meta_mOTU_v25_13034]	0	0	0	0	0	0.000198847	0.000649773	0	0	Speciese
Bacteroidales species incertae sedis [meta_mOTU_v25_12262]	0.000536769	0.000356888	0.00213447	0.000574713	0	0.000397693	0.0233918	0.00586042	0.000452899	Speciese
Bacteroidales species incertae sedis [meta_mOTU_v25_12811]	0.00107354	0.00107066	0.00160085	0	0.000511902	0.00059654	0	0	0	Speciese
Bacteroidales species incertae sedis [meta_mOTU_v25_13286]	0.000536769	0	0.000533618	0.000574713	0	0.000397693	0.0194932	0.0122536	0.000905797	Speciese
Bacteroidales species incertae sedis [meta_mOTU_v25_13838]	0	0.000356888	0	0	0.000511902	0.000198847	0.00389864	0	0	Speciese
Bacteroides bouchesdurhonensis/faecichinchillae [ref_mOTU_v25_03487]	0.000536769	0.000356888	0.000533618	0	0	0.00059654	0	0	0	Speciese
Bacteroides caccae [ref_mOTU_v25_03473]	0.000536769	0.000356888	0.011206	0.0195402	0	0.000397693	0.000649773	0	0.00543478	Speciese
Bacteroides caecimuris [ref_mOTU_v25_03476]	0.00161031	0.00178444	0.00533618	0.00114943	0.000511902	0.00119308	0.00194932	0.0138519	0.00271739	Speciese
Bacteroides cellulosilyticus/fragilis [ref_mOTU_v25_01597]	0	0.000356888	0.0160085	0.0137931	0.0281546	0	0.0344379	0.00319659	0.000452899	Speciese
Bacteroides clarus [ref_mOTU_v25_01578]	0.000536769	0.00963597	0	0.000574713	0	0	0	0	0	Speciese
Bacteroides coprocola [ref_mOTU_v25_11279]	0	0.012848	0.000533618	0	0	0	0	0.000532765	0.044837	Speciese
Bacteroides coprophilus [ref_mOTU_v25_04094]	0.000536769	0	0.000533618	0	0	0	0	0	0.000452899	Speciese
Bacteroides dorei/vulgatus [ref_mOTU_v25_02367]	0.0246914	0.031763	0.194237	0.471839	0.210648	0.0445417	0.42885	0.250932	0.0656703	Speciese
Bacteroides eggerthii [ref_mOTU_v25_01577]	0	0.0231977	0	0.00114943	0	0	0	0	0.000452899	Speciese
Bacteroides faecis/thetaiotaomicron [ref_mOTU_v25_01657]	0.00107354	0.00606709	0.0186766	0.0103448	0.113386	0.00357924	0.0071475	0.0255727	0.00362319	Speciese
Bacteroides finegoldii [ref_mOTU_v25_03474]	0.000536769	0.00499643	0.000533618	0	0	0	0.000649773	0.00106553	0	Speciese
Bacteroides fragilis [ref_mOTU_v25_01598]	0	0	0.000533618	0.000574713	0.000255951	0.00139193	0	0	0	Speciese
Bacteroides intestinalis [ref_mOTU_v25_02809]	0.00107354	0.00178444	0.00480256	0	0.00844638	0.000397693	0	0	0	Speciese
Bacteroides massiliensis [ref_mOTU_v25_02135]	0	0.0385439	0	0.00114943	0.000767853	0.00218731	0.000649773	0.00106553	0.0457428	Speciese
Bacteroides nordii [ref_mOTU_v25_01682]	0	0.000356888	0.00160085	0.000574713	0.000511902	0.000198847	0	0.00106553	0	Speciese
Bacteroides plebeius [ref_mOTU_v25_05069]	0.12131	0.0264097	0	0	0	0.0449394	0	0	0.000452899	Speciese
Bacteroides rodentium/uniformis [ref_mOTU_v25_00855]	0.020934	0.00392577	0.0795091	0.0258621	0.145636	0.0397693	0.0825211	0.0985615	0.00452899	Speciese
Bacteroides salyersiae [ref_mOTU_v25_02140]	0.000536769	0.00178444	0.00800427	0.000574713	0.000255951	0.000795387	0.00844704	0.000532765	0.00271739	Speciese
Bacteroides sartorii [ref_mOTU_v25_02366]	0.000536769	0.000356888	0.000533618	0.000574713	0	0	0.000649773	0.000532765	0.000452899	Speciese
Bacteroides sp. [ref_mOTU_v25_02810]	0.00214707	0.00571021	0.018143	0	0.00383926	0.000994233	0.00194932	0.00319659	0	Speciese
Bacteroides sp. [ref_mOTU_v25_03475]	0.00161031	0.00214133	0.0208111	0.0264368	0.0941899	0.00198847	0.0649773	0.105487	0.0181159	Speciese
Bacteroides stercoris [ref_mOTU_v25_01579]	0.0150295	0.000356888	0.0202775	0.114368	0.159201	0.0123285	0.000649773	0.027171	0.00634058	Speciese
Barnesiella intestinihominis [ref_mOTU_v25_03595]	0	0.000713776	0.000533618	0	0	0.000397693	0	0	0	Speciese
Bifidobacterium catenulatum/kashiwanohense [ref_mOTU_v25_02701]	0	0	0	0	0.00127975	0	0.00129955	0	0	Speciese
Bifidobacterium longum [ref_mOTU_v25_01099]	0.000536769	0	0	0	0.0010238	0	0.000649773	0	0	Speciese
Bifidobacterium pseudocatenulatum [ref_mOTU_v25_02700]	0	0	0	0	0.0133094	0	0.000649773	0	0	Speciese
Bilophila wadsworthia [ref_mOTU_v25_04300]	0.00107354	0.000713776	0.00106724	0.00114943	0	0.000198847	0.00324886	0.00319659	0.000905797	Speciese
Blautia hansenii [ref_mOTU_v25_03670]	0	0	0	0	0	0	0.000649773	0	0.00317029	Speciese
Blautia massiliensis [ref_mOTU_v25_03342]	0.000536769	0.000356888	0	0	0	0.000795387	0	0.000532765	0.000452899	Speciese
Blautia obeum [ref_mOTU_v25_05139]	0.00107354	0.000356888	0.00106724	0.000574713	0.000511902	0.00059654	0	0.000532765	0.0013587	Speciese
Blautia obeum [ref_mOTU_v25_05140]	0	0.000356888	0	0.000574713	0	0.000198847	0.000649773	0	0.000452899	Speciese
Blautia obeum/wexlerae [ref_mOTU_v25_02154]	0.00161031	0.00107066	0.00480256	0.00804598	0.00486307	0.000795387	0.00259909	0.00106553	0.00498188	Speciese
Blautia producta [ref_mOTU_v25_02151]	0	0.000356888	0	0	0.000255951	0	0	0	0	Speciese
Blautia sp. [ref_mOTU_v25_03597]	0.000536769	0	0.000533618	0	0	0.000198847	0	0	0.000452899	Speciese
Burkholderiales species incertae sedis [meta_mOTU_v25_12785]	0.00107354	0	0.00800427	0.0103448	0	0.00735733	0.0246914	0.0218434	0	Speciese
Butyricicoccus species incertae sedis [meta_mOTU_v25_12336]	0.00107354	0.000713776	0.000533618	0.000574713	0	0.000397693	0.00129955	0.0015983	0.00181159	Speciese
Butyricicoccus species incertae sedis [meta_mOTU_v25_12617]	0	0.000713776	0	0	0	0.000795387	0	0	0	Speciese
Butyricimonas virosa [ref_mOTU_v25_02160]	0.000536769	0.000356888	0.000533618	0.000574713	0	0.000198847	0	0.00319659	0.000452899	Speciese
Clostridiales bacterium VE202-09 [ref_mOTU_v25_03441]	0	0	0	0.000574713	0.000255951	0	0	0	0	Speciese
Clostridiales sp. [ref_mOTU_v25_02968]	0	0.000356888	0.000533618	0	0	0	0	0	0	Speciese
Clostridiales sp. [ref_mOTU_v25_03605]	0	0.0239115	0.00480256	0	0	0.00357924	0	0	0	Speciese
Clostridiales sp. [ref_mOTU_v25_03611]	0.00107354	0.00463954	0	0	0	0.000198847	0	0	0	Speciese
Clostridiales sp. [ref_mOTU_v25_03634]	0.00107354	0.0157031	0	0	0	0	0	0	0	Speciese
Clostridiales sp. [ref_mOTU_v25_03658]	0.000536769	0	0.00320171	0.00114943	0	0.00059654	0	0	0.000452899	Speciese
Clostridiales sp. [ref_mOTU_v25_03661]	0.000536769	0.000356888	0.000533618	0.000574713	0.00153571	0.000198847	0	0.000532765	0.000905797	Speciese
Clostridiales sp. [ref_mOTU_v25_05137]	0.000536769	0.000356888	0.00106724	0	0	0	0	0	0.000452899	Speciese
Clostridiales species incertae sedis [meta_mOTU_v25_12229]	0	0	0.0128068	0	0	0	0.00259909	0	0.000905797	Speciese
Clostridiales species incertae sedis [meta_mOTU_v25_12251]	0.000536769	0.000356888	0.00373533	0	0	0.000198847	0	0	0	Speciese
Clostridiales species incertae sedis [meta_mOTU_v25_12252]	0.00966184	0.0720914	0.0394877	0.000574713	0.000255951	0.0580632	0	0.00905701	0.00498188	Speciese
Clostridiales species incertae sedis [meta_mOTU_v25_12253]	0.000536769	0.00107066	0	0	0	0	0	0	0	Speciese
Clostridiales species incertae sedis [meta_mOTU_v25_12254]	0.000536769	0.0028551	0	0	0	0	0	0	0	Speciese
Clostridiales species incertae sedis [meta_mOTU_v25_12265]	0	0.00107066	0	0	0	0.000397693	0	0	0.000905797	Speciese
Clostridiales species incertae sedis [meta_mOTU_v25_12284]	0.00107354	0.000713776	0.0117396	0.00287356	0	0.00576655	0.00194932	0.00905701	0.000452899	Speciese
Clostridiales species incertae sedis [meta_mOTU_v25_12288]	0	0.000713776	0.00160085	0.00114943	0	0.000397693	0	0.0015983	0.000905797	Speciese
Clostridiales species incertae sedis [meta_mOTU_v25_12309]	0.00161031	0.000713776	0.00106724	0	0	0.000198847	0	0	0.000905797	Speciese
Clostridiales species incertae sedis [meta_mOTU_v25_12323]	0	0.00107066	0	0.00172414	0	0	0	0	0	Speciese
Clostridiales species incertae sedis [meta_mOTU_v25_12334]	0.00107354	0.000713776	0.000533618	0	0	0	0	0	0	Speciese
Clostridiales species incertae sedis [meta_mOTU_v25_12340]	0.00644122	0.00214133	0.0133404	0	0	0.00457347	0	0	0	Speciese
Clostridiales species incertae sedis [meta_mOTU_v25_12356]	0.000536769	0.00428266	0.00480256	0	0	0.00119308	0	0.00213106	0.000905797	Speciese
Clostridiales species incertae sedis [meta_mOTU_v25_12361]	0	0.00142755	0.000533618	0	0	0.00059654	0	0.00106553	0	Speciese
Clostridiales species incertae sedis [meta_mOTU_v25_12411]	0.00107354	0.00107066	0.00213447	0	0	0.000198847	0	0	0.000452899	Speciese
Clostridiales species incertae sedis [meta_mOTU_v25_12434]	0.00107354	0.00107066	0.000533618	0	0	0.00159077	0	0	0	Speciese
Clostridiales species incertae sedis [meta_mOTU_v25_12437]	0.000536769	0.00606709	0	0	0	0.00198847	0	0	0.000452899	Speciese
Clostridiales species incertae sedis [meta_mOTU_v25_12447]	0.00161031	0.0028551	0.00160085	0	0	0.00059654	0	0	0	Speciese
Clostridiales species incertae sedis [meta_mOTU_v25_12452]	0	0.000356888	0.00106724	0	0	0	0	0	0	Speciese
Clostridiales species incertae sedis [meta_mOTU_v25_12463]	0.00375738	0.00107066	0.000533618	0	0	0.000198847	0	0	0	Speciese
Clostridiales species incertae sedis [meta_mOTU_v25_12473]	0	0	0	0	0	0	0.000649773	0.00692595	0.000452899	Speciese
Clostridiales species incertae sedis [meta_mOTU_v25_12476]	0.00161031	0.00142755	0.0058698	0	0	0.00437463	0	0.00958977	0	Speciese
Clostridiales species incertae sedis [meta_mOTU_v25_12494]	0	0.000713776	0.00106724	0	0	0.000198847	0	0	0	Speciese
Clostridiales species incertae sedis [meta_mOTU_v25_12516]	0.000536769	0.00107066	0	0	0	0.000198847	0	0	0	Speciese
Clostridiales species incertae sedis [meta_mOTU_v25_12522]	0.00107354	0.00713776	0.00106724	0	0	0.00178962	0	0.000532765	0	Speciese
Clostridiales species incertae sedis [meta_mOTU_v25_12524]	0	0	0	0	0	0	0.00649773	0	0	Speciese
Clostridiales species incertae sedis [meta_mOTU_v25_12554]	0	0.000356888	0.000533618	0	0	0.00059654	0	0	0.0104167	Speciese
Clostridiales species incertae sedis [meta_mOTU_v25_12556]	0	0.000713776	0.000533618	0	0	0.000198847	0	0	0.0108696	Speciese
Clostridiales species incertae sedis [meta_mOTU_v25_12561]	0.000536769	0	0.00426894	0	0	0	0	0	0	Speciese
Clostridiales species incertae sedis [meta_mOTU_v25_12563]	0.00107354	0.00107066	0.00480256	0	0	0.000198847	0	0.000532765	0.000905797	Speciese
Clostridiales species incertae sedis [meta_mOTU_v25_12631]	0	0.000713776	0.000533618	0	0	0	0	0	0	Speciese
Clostridiales species incertae sedis [meta_mOTU_v25_12635]	0	0.000356888	0.00106724	0	0	0.000198847	0	0	0	Speciese
Clostridiales species incertae sedis [meta_mOTU_v25_12653]	0.000536769	0.00107066	0	0.00114943	0	0.000397693	0.00389864	0.00426212	0.00452899	Speciese
Clostridiales species incertae sedis [meta_mOTU_v25_12674]	0.00805153	0	0.00266809	0	0	0	0	0	0	Speciese
Clostridiales species incertae sedis [meta_mOTU_v25_12690]	0.000536769	0	0	0.00114943	0	0.00835156	0	0	0	Speciese
Clostridiales species incertae sedis [meta_mOTU_v25_12707]	0.000536769	0.000713776	0.000533618	0	0	0.000198847	0	0	0.000905797	Speciese
Clostridiales species incertae sedis [meta_mOTU_v25_12742]	0	0	0.000533618	0	0	0.000198847	0	0.00106553	0.00362319	Speciese
Clostridiales species incertae sedis [meta_mOTU_v25_12755]	0.000536769	0.000356888	0	0	0	0	0	0	0	Speciese
Clostridiales species incertae sedis [meta_mOTU_v25_12776]	0	0.000713776	0.000533618	0	0	0.000397693	0	0	0	Speciese
Clostridiales species incertae sedis [meta_mOTU_v25_12786]	0	0.000356888	0	0	0	0.000198847	0	0	0	Speciese
Clostridiales species incertae sedis [meta_mOTU_v25_12887]	0	0	0.000533618	0	0	0.000397693	0	0	0	Speciese
Clostridiales species incertae sedis [meta_mOTU_v25_13006]	0	0	0	0.00114943	0.000511902	0	0.000649773	0.000532765	0.000452899	Speciese
Clostridiales species incertae sedis [meta_mOTU_v25_13140]	0	0	0	0.00229885	0.00460712	0	0.00324886	0.000532765	0	Speciese
Clostridiales species incertae sedis [meta_mOTU_v25_13168]	0	0.000356888	0	0	0	0.000198847	0	0	0.000452899	Speciese
Clostridiales species incertae sedis [meta_mOTU_v25_13187]	0	0.000356888	0	0	0	0.000198847	0	0	0	Speciese
Clostridiales species incertae sedis [meta_mOTU_v25_13202]	0.00107354	0	0	0	0	0.000397693	0	0	0	Speciese
Clostridiales species incertae sedis [meta_mOTU_v25_13280]	0.000536769	0.000713776	0.000533618	0	0	0.00059654	0	0	0	Speciese
Clostridiales species incertae sedis [meta_mOTU_v25_13377]	0.000536769	0.000356888	0.000533618	0	0	0.00059654	0.000649773	0.00319659	0.00181159	Speciese
Clostridiales species incertae sedis [meta_mOTU_v25_13432]	0.000536769	0.000356888	0.00106724	0	0	0.000198847	0	0	0.000452899	Speciese
Clostridiales species incertae sedis [meta_mOTU_v25_13701]	0	0.000356888	0	0	0	0.000397693	0	0	0	Speciese
Clostridiales species incertae sedis [meta_mOTU_v25_13863]	0.00161031	0.00107066	0.00320171	0	0	0.00198847	0	0	0	Speciese
Clostridiales species incertae sedis [meta_mOTU_v25_13955]	0	0	0.000533618	0	0.000255951	0	0	0	0.000452899	Speciese
Clostridiales species incertae sedis [meta_mOTU_v25_14118]	0.00268384	0.00678087	0.000533618	0	0	0	0	0	0	Speciese
Clostridiales species incertae sedis [meta_mOTU_v25_14166]	0.00107354	0.00107066	0.000533618	0	0	0.00059654	0.000649773	0	0.000452899	Speciese
Clostridiales species incertae sedis [meta_mOTU_v25_14425]	0.000536769	0	0	0	0	0.000397693	0	0.000532765	0	Speciese
Clostridium phoceensis [ref_mOTU_v25_08865]	0	0	0.000533618	0	0	0.000198847	0	0.000532765	0	Speciese
Clostridium sp. [ref_mOTU_v25_03343]	0	0	0	0.000574713	0	0	0	0.000532765	0	Speciese
Clostridium sp. [ref_mOTU_v25_03599]	0	0.00107066	0	0.00114943	0	0	0	0	0	Speciese
Clostridium sp. [ref_mOTU_v25_03604]	0.000536769	0	0.000533618	0	0	0	0	0	0	Speciese
Clostridium sp. [ref_mOTU_v25_03607]	0.00214707	0.000356888	0	0	0	0	0	0	0	Speciese
Clostridium sp. [ref_mOTU_v25_03608]	0.000536769	0	0.00160085	0	0	0	0	0	0	Speciese
Clostridium sp. [ref_mOTU_v25_03613]	0.000536769	0	0	0	0	0.00119308	0	0	0	Speciese
Clostridium sp. [ref_mOTU_v25_03614]	0	0	0.000533618	0	0	0.000198847	0	0	0	Speciese
Clostridium sp. [ref_mOTU_v25_03618]	0.00107354	0	0.000533618	0	0	0	0	0	0	Speciese
Clostridium sp. [ref_mOTU_v25_03622]	0.000536769	0.000713776	0.00160085	0.00517241	0	0.00218731	0	0.00106553	0.000905797	Speciese
Clostridium sp. [ref_mOTU_v25_03675]	0	0.000356888	0.000533618	0	0	0.00059654	0	0.00106553	0.0013587	Speciese
Clostridium sp. [ref_mOTU_v25_03676]	0.000536769	0	0	0	0	0.000397693	0	0	0.000452899	Speciese
Clostridium sp. [ref_mOTU_v25_03680]	0.00161031	0.0224839	0.000533618	0.00344828	0.000767853	0.00059654	0.000649773	0.00426212	0.00181159	Speciese
Clostridium sp. 27_14 [meta_mOTU_v25_12513]	0.00107354	0	0	0	0	0	0	0	0.0140399	Speciese
Clostridium sp. 27_14 [ref_mOTU_v25_10412]	0.00161031	0	0	0	0	0	0	0	0.00543478	Speciese
Clostridium sp. CAG:127 [meta_mOTU_v25_12306]	0.0230811	0.0360457	0	0	0	0.0469278	0	0	0	Speciese
Clostridium sp. CAG:138 [meta_mOTU_v25_12233]	0.00214707	0.000356888	0.000533618	0	0	0	0	0	0	Speciese
Clostridium sp. CAG:217 [meta_mOTU_v25_12270]	0.00483092	0.000713776	0.00373533	0.00114943	0	0.00656194	0	0.00213106	0	Speciese
Clostridium sp. CAG:299 [ref_mOTU_v25_07619]	0.000536769	0.000356888	0	0	0	0	0	0	0.000452899	Speciese
Clostridium sp. CAG:302 [meta_mOTU_v25_12499]	0.000536769	0.00463954	0.00266809	0	0	0	0	0	0	Speciese
Clostridium sp. CAG:302 [ref_mOTU_v25_07620]	0.000536769	0	0.00106724	0	0	0	0	0	0	Speciese
Clostridium sp. CAG:43 [ref_mOTU_v25_07626]	0.000536769	0.000356888	0	0	0	0	0	0	0	Speciese
Clostridium sp. CAG:433 [meta_mOTU_v25_12886]	0.000536769	0.000356888	0	0	0	0	0	0	0	Speciese
Clostridium sp. CAG:492 [meta_mOTU_v25_12462]	0.000536769	0	0.00373533	0	0	0.00119308	0	0	0	Speciese
Clostridium sp. CAG:492 [ref_mOTU_v25_07633]	0.000536769	0	0.000533618	0	0	0.000198847	0	0	0	Speciese
Clostridium sp. CAG:58 [ref_mOTU_v25_07640]	0.00107354	0.00107066	0	0	0	0.000198847	0	0	0	Speciese
Clostridium sp. CAG:7 [ref_mOTU_v25_07647]	0.00107354	0.000713776	0.00373533	0	0.000255951	0.000397693	0	0	0.00226449	Speciese
Clostridium sp. CAG:780 [meta_mOTU_v25_12821]	0.00107354	0	0.000533618	0	0	0	0	0	0	Speciese
Clostridium species incertae sedis [meta_mOTU_v25_12234]	0.00429415	0.000356888	0.000533618	0	0	0.016902	0	0	0	Speciese
Clostridium species incertae sedis [meta_mOTU_v25_12348]	0	0	0.00106724	0	0	0.000198847	0	0	0	Speciese
Clostridium species incertae sedis [meta_mOTU_v25_12399]	0.000536769	0	0.000533618	0	0	0.00775502	0	0	0	Speciese
Clostridium species incertae sedis [meta_mOTU_v25_12417]	0.00161031	0.0107066	0.00160085	0	0	0	0	0	0	Speciese
Clostridium species incertae sedis [meta_mOTU_v25_12597]	0.00107354	0	0	0	0	0.00178962	0	0	0	Speciese
Clostridium species incertae sedis [meta_mOTU_v25_12640]	0.00322061	0	0.000533618	0	0	0.00318155	0	0	0	Speciese
Clostridium species incertae sedis [meta_mOTU_v25_13535]	0	0	0.000533618	0	0	0	0	0	0.000452899	Speciese
Collinsella aerofaciens [ref_mOTU_v25_03626]	0.000536769	0.000356888	0	0	0	0.000198847	0	0	0.000452899	Speciese
Comamonas kerstersii [ref_mOTU_v25_05249]	0.000536769	0	0	0	0	0.000198847	0	0	0.000452899	Speciese
Coprobacter fastidiosus [ref_mOTU_v25_03667]	0	0.0028551	0	0.00172414	0	0.000198847	0	0	0	Speciese
Coprococcus catus [ref_mOTU_v25_11851]	0.000536769	0.000356888	0	0.000574713	0	0.000397693	0	0	0	Speciese
Coprococcus comes [ref_mOTU_v25_03690]	0.00161031	0.00178444	0.00160085	0	0	0.000198847	0	0	0.000452899	Speciese
Coprococcus eutactus [ref_mOTU_v25_02378]	0.000536769	0	0.000533618	0	0	0.000397693	0	0	0	Speciese
Coprococcus sp. [ref_mOTU_v25_01683]	0	0	0	0.000574713	0.000255951	0	0.000649773	0	0.000452899	Speciese
Culturomica massiliensis [ref_mOTU_v25_03637]	0.000536769	0.000713776	0	0	0	0	0	0	0	Speciese
Desulfovibrio piger [ref_mOTU_v25_06282]	0.00107354	0	0	0	0	0	0	0.000532765	0	Speciese
Dialister sp. CAG:357 [meta_mOTU_v25_12661]	0	0	0.00106724	0.000574713	0	0	0.000649773	0	0.0122283	Speciese
Dialister sp. CAG:357 [ref_mOTU_v25_07665]	0	0	0.000533618	0.000574713	0	0	0	0	0.00452899	Speciese
Dielma fastidiosa [ref_mOTU_v25_01061]	0.000536769	0	0	0	0	0.000198847	0	0	0	Speciese
Dorea formicigenerans [ref_mOTU_v25_03668]	0.00107354	0.000356888	0.000533618	0.00114943	0	0.00059654	0.000649773	0.000532765	0.000905797	Speciese
Dorea longicatena [ref_mOTU_v25_03692]	0.000536769	0.000356888	0	0	0.00307141	0.000198847	0.000649773	0.000532765	0.000905797	Speciese
Dorea longicatena [ref_mOTU_v25_03693]	0.00214707	0.000356888	0.000533618	0.00172414	0.000255951	0.00119308	0.000649773	0.00106553	0.00634058	Speciese
Eggerthella lenta [ref_mOTU_v25_00719]	0	0	0	0.000574713	0	0	0.000649773	0	0	Speciese
Enterobacterales sp. [ref_mOTU_v25_00085]	0	0	0.000533618	0.000574713	0.000255951	0.000198847	0.000649773	0	0.000452899	Speciese
Enterobacteriaceae sp. [ref_mOTU_v25_00096]	0	0	0	0.000574713	0.000511902	0.00059654	0.000649773	0	0	Speciese
Erysipelatoclostridium ramosum [ref_mOTU_v25_03439]	0	0	0	0	0.0010238	0	0.000649773	0	0	Speciese
Eubacterium sp. [ref_mOTU_v25_02373]	0	0	0.000533618	0	0	0	0	0	0.000905797	Speciese
Eubacterium sp. [ref_mOTU_v25_03633]	0.000536769	0.000713776	0.000533618	0	0	0	0.000649773	0	0.000452899	Speciese
Eubacterium sp. CAG:156 [ref_mOTU_v25_07673]	0	0.0139186	0	0	0.00230356	0	0	0	0	Speciese
Eubacterium sp. CAG:180 [ref_mOTU_v25_07675]	0.000536769	0	0	0	0	0.00218731	0	0	0.0126812	Speciese
Eubacterium sp. CAG:274 [meta_mOTU_v25_12688]	0	0.00214133	0	0.00229885	0	0.000198847	0	0	0	Speciese
Eubacterium sp. CAG:38 [ref_mOTU_v25_07679]	0.000536769	0.000356888	0.000533618	0.00689655	0.010494	0.00735733	0.00389864	0.00106553	0.000452899	Speciese
Eubacterium species incertae sedis [meta_mOTU_v25_12260]	0.000536769	0.00927909	0.000533618	0	0	0.00835156	0	0.0191795	0.000905797	Speciese
Eubacterium species incertae sedis [meta_mOTU_v25_12314]	0.000536769	0.000356888	0.000533618	0	0	0	0.000649773	0.000532765	0.0013587	Speciese
Eubacterium species incertae sedis [meta_mOTU_v25_12474]	0.000536769	0	0.000533618	0	0	0.0029827	0	0.00852424	0.00498188	Speciese
Eubacterium ventriosum [ref_mOTU_v25_11151]	0	0.0028551	0.000533618	0	0	0.0369855	0	0	0	Speciese
Faecalibacterium prausnitzii [meta_mOTU_v25_13917]	0	0.00107066	0.00106724	0	0.000511902	0	0	0	0.000452899	Speciese
Faecalibacterium prausnitzii [ref_mOTU_v25_06108]	0.00322061	0.0114204	0.0090715	0	0	0.00258501	0	0.00106553	0.026721	Speciese
Faecalibacterium prausnitzii [ref_mOTU_v25_06109]	0.00268384	0.00356888	0.0170758	0	0	0.0089481	0	0.00319659	0.000452899	Speciese
Faecalibacterium prausnitzii [ref_mOTU_v25_06110]	0.00322061	0.025339	0.00693703	0	0	0.00059654	0	0.0015983	0.000452899	Speciese
Faecalibacterium prausnitzii [ref_mOTU_v25_06112]	0.0407944	0.0235546	0.0298826	0.0143678	0.0130535	0.00338039	0.000649773	0.0106553	0.0104167	Speciese
Faecalibacterium sp. [ref_mOTU_v25_03636]	0	0.0174875	0	0	0	0.00318155	0	0	0	Speciese
Faecalibacterium species incertae sedis [meta_mOTU_v25_12303]	0.00161031	0.0185582	0.000533618	0	0	0.000795387	0	0.00106553	0	Speciese
Faecalibacterium species incertae sedis [meta_mOTU_v25_12325]	0.00268384	0.00428266	0.0480256	0.00229885	0	0.00536886	0	0.0277038	0.00181159	Speciese
Faecalibacterium species incertae sedis [meta_mOTU_v25_12331]	0.000536769	0	0.000533618	0	0	0	0	0	0	Speciese
Faecalibacterium species incertae sedis [meta_mOTU_v25_12403]	0.000536769	0.00214133	0.00213447	0	0	0.000795387	0	0.000532765	0	Speciese
Faecalicatena contorta [ref_mOTU_v25_03445]	0	0.000356888	0	0	0	0	0	0.000532765	0	Speciese
Firmicutes bacterium CAG:102 [ref_mOTU_v25_07726]	0	0.00535332	0.00533618	0	0	0.00218731	0	0.00266383	0.000452899	Speciese
Firmicutes bacterium CAG:103 [ref_mOTU_v25_07727]	0	0	0	0	0	0.000198847	0	0	0.000452899	Speciese
Firmicutes bacterium CAG:114 [ref_mOTU_v25_07728]	0.000536769	0.000713776	0.000533618	0	0	0.000198847	0	0.000532765	0.000452899	Speciese
Firmicutes bacterium CAG:137 [ref_mOTU_v25_07731]	0.000536769	0.000356888	0	0	0	0	0	0	0	Speciese
Firmicutes bacterium CAG:227 [ref_mOTU_v25_07734]	0	0.000356888	0.00106724	0	0	0.000198847	0	0	0.0013587	Speciese
Firmicutes bacterium CAG:449 [ref_mOTU_v25_07740]	0	0	0.000533618	0	0	0.000198847	0	0	0	Speciese
Firmicutes bacterium CAG:95 [ref_mOTU_v25_07718]	0.000536769	0	0.000533618	0	0	0	0	0	0	Speciese
Firmicutes sp. [ref_mOTU_v25_00854]	0.000536769	0	0.000533618	0	0	0	0	0	0.000452899	Speciese
Firmicutes sp. [ref_mOTU_v25_02374]	0	0.0167737	0.000533618	0.0350575	0.000255951	0	0	0.00106553	0.0421196	Speciese
Firmicutes sp. [ref_mOTU_v25_02743]	0.000536769	0	0	0.000574713	0.000255951	0	0.000649773	0.000532765	0	Speciese
Firmicutes sp. [ref_mOTU_v25_03629]	0.000536769	0.00463954	0.00106724	0.000574713	0	0	0	0	0.000905797	Speciese
Firmicutes sp. [ref_mOTU_v25_03641]	0	0.00963597	0.00266809	0.0126437	0.0394164	0.000198847	0.0168941	0.0261055	0.0013587	Speciese
Firmicutes species incertae sedis [meta_mOTU_v25_12231]	0	0	0.000533618	0	0	0.000198847	0	0	0	Speciese
Flavonifractor plautii [ref_mOTU_v25_02971]	0	0	0.000533618	0.000574713	0.00870233	0	0.00649773	0.00745871	0	Speciese
Flavonifractor plautii [ref_mOTU_v25_05238]	0	0	0.000533618	0.000574713	0.00383926	0	0.00519818	0.00426212	0.000452899	Speciese
Fusicatenibacter saccharivorans [ref_mOTU_v25_02680]	0.000536769	0.000713776	0.000533618	0.00114943	0	0.000397693	0.000649773	0.00266383	0	Speciese
Fusobacterium ulcerans [ref_mOTU_v25_05384]	0	0	0	0.000574713	0.000511902	0	0.00129955	0	0	Speciese
Fusobacterium varium [ref_mOTU_v25_05385]	0	0	0.000533618	0	0.000511902	0	0.00649773	0	0.000452899	Speciese
Haemophilus influenzae/parainfluenzae [ref_mOTU_v25_01068]	0.00161031	0.000356888	0.000533618	0.00287356	0	0.00178962	0	0.000532765	0	Speciese
Holdemania filiformis [ref_mOTU_v25_05921]	0	0	0	0.000574713	0	0	0.00129955	0	0.000452899	Speciese
Holdemania massiliensis [ref_mOTU_v25_07383]	0	0	0	0	0	0.000198847	0	0.00106553	0	Speciese
Hungatella hathewayi [ref_mOTU_v25_03436]	0	0	0	0	0.00153571	0	0.00129955	0.000532765	0.000452899	Speciese
Intestinibacter bartlettii [ref_mOTU_v25_03687]	0.000536769	0	0.000533618	0.000574713	0.000511902	0	0.000649773	0.000532765	0	Speciese
Intestinimonas butyriciproducens [ref_mOTU_v25_03928]	0	0	0.000533618	0	0	0	0	0	0.000452899	Speciese
Lachnospira sp. [ref_mOTU_v25_05263]	0.000536769	0.000713776	0	0	0	0.000198847	0	0.000532765	0.000452899	Speciese
Lachnospiraceae species incertae sedis [meta_mOTU_v25_12240]	0.000536769	0.00249822	0.000533618	0.00229885	0.00793448	0.00059654	0.000649773	0.00372936	0	Speciese
Lachnospiraceae species incertae sedis [meta_mOTU_v25_12363]	0.000536769	0	0	0	0	0.000198847	0	0	0	Speciese
Lactobacillus ruminis [ref_mOTU_v25_01239]	0.000536769	0	0.000533618	0	0	0	0	0	0	Speciese
Megamonas funiformis/rupellensis [ref_mOTU_v25_02318]	0	0	0	0.0683908	0	0.00616425	0	0	0	Speciese
Odoribacter splanchnicus [ref_mOTU_v25_03697]	0.00161031	0.00463954	0.00266809	0.000574713	0	0.000795387	0.0116959	0.00639318	0.00181159	Speciese
Oscillibacter sp. [ref_mOTU_v25_03341]	0.000536769	0.000356888	0.000533618	0.000574713	0	0.000198847	0	0.0015983	0.000452899	Speciese
Oscillibacter sp. [ref_mOTU_v25_04664]	0.000536769	0.00392577	0.0117396	0.00172414	0	0.00755617	0	0	0	Speciese
Oscillibacter sp. 57_20 [meta_mOTU_v25_12282]	0.000536769	0.00107066	0.00106724	0.000574713	0	0.00059654	0	0	0.000452899	Speciese
Oscillibacter sp. 57_20 [meta_mOTU_v25_12610]	0.00590446	0.0028551	0.00693703	0	0	0.00159077	0	0.00479489	0.000452899	Speciese
Oscillibacter sp. 57_20 [ref_mOTU_v25_10413]	0.00107354	0.000356888	0.00106724	0	0	0.000397693	0	0	0	Speciese
Oscillibacter species incertae sedis [meta_mOTU_v25_12353]	0	0.00214133	0	0	0	0.000198847	0	0	0	Speciese
Parabacteroides distasonis [ref_mOTU_v25_03640]	0.00214707	0.0103498	0.0058698	0.00229885	0.0115178	0.00059654	0.0149448	0.00372936	0.0013587	Speciese
Parabacteroides goldsteinii [ref_mOTU_v25_01679]	0.000536769	0.000356888	0	0.000574713	0	0.000397693	0	0.000532765	0.000452899	Speciese
Parabacteroides gordonii [ref_mOTU_v25_01680]	0	0.000356888	0	0	0	0.000198847	0	0	0	Speciese
Parabacteroides johnsonii [ref_mOTU_v25_05400]	0.000536769	0	0.00213447	0.000574713	0	0.0029827	0	0	0	Speciese
Parabacteroides merdae [ref_mOTU_v25_05401]	0.000536769	0.000713776	0.0165422	0.0045977	0	0.00218731	0.000649773	0	0.00543478	Speciese
Parabacteroides timonensis [ref_mOTU_v25_01681]	0	0.000356888	0.000533618	0	0.000511902	0.000198847	0	0	0	Speciese
Paraprevotella clara [ref_mOTU_v25_03698]	0.00107354	0.00785153	0	0	0	0	0	0	0.00951087	Speciese
Paraprevotella xylaniphila [ref_mOTU_v25_03699]	0.00751476	0	0	0	0	0	0	0	0.000452899	Speciese
Parasutterella excrementihominis [ref_mOTU_v25_03674]	0	0	0.000533618	0	0.000255951	0.00636309	0	0	0	Speciese
Pasteurellaceae species incertae sedis [meta_mOTU_v25_13253]	0.00107354	0	0.000533618	0.000574713	0	0.00059654	0	0.000532765	0	Speciese
Phascolarctobacterium sp. CAG:207 [meta_mOTU_v25_13298]	0	0	0.00533618	0	0	0.0137204	0.00389864	0	0	Speciese
Phocea massiliensis [ref_mOTU_v25_05236]	0	0	0	0.000574713	0	0.000397693	0	0	0.000452899	Speciese
Prevotella copri [ref_mOTU_v25_03701]	0.00161031	0	0.000533618	0.000574713	0	0.00178962	0	0	0.101902	Speciese
Prevotella species incertae sedis [meta_mOTU_v25_12332]	0	0.000356888	0	0	0	0.289322	0	0	0	Speciese
Prevotella species incertae sedis [meta_mOTU_v25_12791]	0.000536769	0	0	0	0	0	0	0	0.000452899	Speciese
Prevotella stercorea [ref_mOTU_v25_00717]	0.071927	0	0.000533618	0	0	0	0	0	0	Speciese
Proteobacteria sp. [ref_mOTU_v25_00095]	0.000536769	0	0.00106724	0.00287356	0.010494	0.0171008	0.0519818	0.00213106	0.00498188	Speciese
Romboutsia timonensis [ref_mOTU_v25_09389]	0	0	0.000533618	0	0.000767853	0.000795387	0.000649773	0.000532765	0.000452899	Speciese
Roseburia faecis [ref_mOTU_v25_00859]	0.00214707	0	0.000533618	0	0	0.00059654	0	0	0	Speciese
Roseburia hominis [ref_mOTU_v25_00861]	0.000536769	0.00321199	0.00106724	0	0	0.00377809	0.000649773	0	0.0013587	Speciese
Roseburia intestinalis [ref_mOTU_v25_03702]	0.00107354	0.000713776	0.00106724	0.000574713	0	0.000198847	0.0110461	0.000532765	0	Speciese
Roseburia inulinivorans [ref_mOTU_v25_00860]	0.00268384	0.00107066	0.011206	0.0189655	0.00972613	0.00874925	0	0.00213106	0.0629529	Speciese
Roseburia sp. [ref_mOTU_v25_03649]	0.0112721	0.0121342	0.0208111	0	0	0.000397693	0	0	0.0013587	Speciese
Roseburia sp. 40_7 [meta_mOTU_v25_12352]	0.000536769	0.000356888	0	0	0	0	0	0	0	Speciese
Roseburia sp. CAG:303 [meta_mOTU_v25_12911]	0	0.00107066	0.00160085	0	0	0	0	0.000532765	0	Speciese
Roseburia sp. CAG:471 [ref_mOTU_v25_03598]	0	0.000356888	0.000533618	0	0	0.000198847	0	0	0.000452899	Speciese
Roseburia species incertae sedis [meta_mOTU_v25_12366]	0.00268384	0.000356888	0.00160085	0.00747126	0	0.00238616	0.0103964	0.018114	0	Speciese
Roseburia species incertae sedis [meta_mOTU_v25_12746]	0.000536769	0.000713776	0	0	0	0	0	0	0.000452899	Speciese
Roseburia species incertae sedis [meta_mOTU_v25_13251]	0	0.0110635	0.00693703	0	0	0	0	0	0	Speciese
Roseburia species incertae sedis [meta_mOTU_v25_13319]	0	0	0	0	0.00204761	0.000198847	0	0	0.00271739	Speciese
Ruminococcaceae bacterium D16 [ref_mOTU_v25_11463]	0.000536769	0	0	0	0	0	0	0.000532765	0.000452899	Speciese
Ruminococcaceae species incertae sedis [meta_mOTU_v25_12239]	0.00161031	0.000356888	0.00373533	0	0	0.00139193	0	0.00692595	0	Speciese
Ruminococcaceae species incertae sedis [meta_mOTU_v25_12259]	0	0.00107066	0.00266809	0	0	0.00238616	0	0.0015983	0	Speciese
Ruminococcaceae species incertae sedis [meta_mOTU_v25_12264]	0.00107354	0.000356888	0.000533618	0	0	0.000397693	0	0	0	Speciese
Ruminococcaceae species incertae sedis [meta_mOTU_v25_12286]	0	0.00214133	0	0	0	0.000397693	0	0.00319659	0	Speciese
Ruminococcaceae species incertae sedis [meta_mOTU_v25_12664]	0.000536769	0.00214133	0	0	0	0	0	0	0	Speciese
Ruminococcaceae species incertae sedis [meta_mOTU_v25_13151]	0	0.000713776	0	0	0	0.00139193	0	0	0	Speciese
Ruminococcaceae species incertae sedis [meta_mOTU_v25_13305]	0	0	0.000533618	0	0	0	0	0.0202451	0	Speciese
Ruminococcaceae species incertae sedis [meta_mOTU_v25_13471]	0	0	0.00320171	0	0	0.00059654	0	0	0	Speciese
Ruminococcus bicirculans [ref_mOTU_v25_02792]	0	0.0139186	0.000533618	0	0	0.00855041	0	0.00213106	0	Speciese
Ruminococcus bromii [ref_mOTU_v25_00853]	0.0182501	0.0124911	0	0.00574713	0.000255951	0.00616425	0.0129955	0.015983	0	Speciese
Ruminococcus callidus [ref_mOTU_v25_11153]	0	0.00856531	0.000533618	0	0	0.000397693	0	0	0.00588768	Speciese
Ruminococcus lactaris [ref_mOTU_v25_01595]	0.00268384	0.00142755	0.00373533	0	0.000255951	0.00059654	0	0.000532765	0.0199275	Speciese
Ruminococcus sp. [ref_mOTU_v25_03681]	0	0.00142755	0.000533618	0	0	0.00059654	0	0.00106553	0	Speciese
Ruminococcus sp. CAG:177 [meta_mOTU_v25_12235]	0.00107354	0	0	0	0	0.000397693	0	0	0	Speciese
Ruminococcus sp. CAG:254 [meta_mOTU_v25_12276]	0.000536769	0	0	0	0	0.00477232	0	0	0	Speciese
Ruthenibacterium lactatiformans [ref_mOTU_v25_04716]	0.000536769	0	0	0.000574713	0.000255951	0.000198847	0.00129955	0.000532765	0.000452899	Speciese
Streptococcus parasanguinis [ref_mOTU_v25_00312]	0	0.000356888	0	0	0.000255951	0.000198847	0	0.000532765	0	Speciese
Streptococcus sp. [ref_mOTU_v25_00310]	0	0	0	0	0.000511902	0.000397693	0	0	0	Speciese
Streptococcus sp. [ref_mOTU_v25_00900]	0	0	0	0.000574713	0.00307141	0	0	0	0	Speciese
Streptococcus sp. [ref_mOTU_v25_01350]	0.000536769	0.000356888	0.000533618	0.000574713	0.00204761	0.000397693	0	0.000532765	0.000452899	Speciese
Sutterella sp. CAG:351 [meta_mOTU_v25_13411]	0.000536769	0	0.000533618	0	0	0.000795387	0	0.00213106	0.0013587	Speciese
Sutterellaceae species incertae sedis [meta_mOTU_v25_12389]	0.00644122	0	0.000533618	0	0	0	0	0	0	Speciese
Turicibacter sanguinis [ref_mOTU_v25_04703]	0.000536769	0	0	0	0	0	0	0	0.000452899	Speciese
Tyzzerella nexilis [ref_mOTU_v25_03689]	0	0	0	0.00172414	0.00332736	0	0.00389864	0.000532765	0	Speciese
unclassified	0.034632	0.0227867	0.0336408	0.0127582	0.0175344	0.0430152	0.0181564	0.0264609	0.0163383	Class
unclassified	0.019845	0.0172219	0.0202218	0.0066017	0.00891388	0.024527	0.0101049	0.0149347	0.010201	Family
unclassified	0.0416667	0.0364614	0.0409511	0.0132242	0.0179113	0.0493305	0.0202335	0.0305344	0.0248902	Genus
unclassified	0.034632	0.0227867	0.0336408	0.0127582	0.0175439	0.0430152	0.0181564	0.0264609	0.0163383	Order
unclassified	0.0344086	0.021856	0.0331551	0.0120968	0.0166496	0.0417827	0.0168941	0.0255727	0.0154475	Phylum
unclassified	0.0343532	0.0217702	0.0330843	0.012069	0.0166368	0.0417578	0.0168941	0.0255727	0.0153986	Speciese
uncultured Blautia sp. [ref_mOTU_v25_03662]	0	0.000713776	0.000533618	0	0	0.000198847	0	0	0.00724638	Speciese
uncultured Butyricicoccus sp. [ref_mOTU_v25_07314]	0.00107354	0.000356888	0	0	0	0	0.00129955	0.00106553	0.000905797	Speciese
uncultured Clostridium sp. [ref_mOTU_v25_02381]	0	0	0	0.00114943	0	0	0	0	0.000452899	Speciese
uncultured Clostridium sp. [ref_mOTU_v25_03623]	0.000536769	0	0	0	0	0	0	0.000532765	0	Speciese
uncultured Clostridium sp. [ref_mOTU_v25_06391]	0	0.000713776	0.00106724	0	0	0.000198847	0	0	0	Speciese
uncultured Clostridium sp. [ref_mOTU_v25_11606]	0	0.000356888	0	0	0	0.000198847	0	0	0	Speciese
uncultured Clostridium sp. [ref_mOTU_v25_11607]	0.00161031	0.000356888	0	0	0	0.000198847	0	0	0	Speciese
uncultured Flavonifractor sp. [ref_mOTU_v25_07315]	0	0	0	0	0	0	0.000649773	0.00426212	0.000452899	Speciese
Veillonella atypica [ref_mOTU_v25_01941]	0	0.000356888	0	0	0.000511902	0	0	0.000532765	0	Speciese
Veillonella dispar [ref_mOTU_v25_01940]	0	0.000356888	0	0	0.000255951	0.000198847	0	0	0	Speciese
Veillonella parvula [ref_mOTU_v25_01938]	0	0.000356888	0	0	0.000255951	0	0	0.000532765	0	Speciese
Veillonella rogosae [ref_mOTU_v25_01939]	0	0.000356888	0	0.000574713	0	0.000198847	0.000649773	0	0	Speciese
