# Supplementary material for: Captivity Influences the Gut Microbiome of Rhinopithecus roxellana
Source: Frontiers journal article supplement (doi:10.3389/fmicb.2021.763022), 2021-12-07
Supplement: Table_3.XLS [file Table_3.XLS]

## Sheet: K_numbers_CRr_WRr
sample	R01	R02	R03	R04	R05	R06	R08	R09	R10	R14	R15	R16	R17	R18	R19	R20	R21	R22	p_value	p-fdr-value	beta
group	CRr	CRr	CRr	CRr	CRr	CRr	CRr	CRr	CRr	WRr	WRr	WRr	WRr	WRr	WRr	WRr	WRr	WRr	-	-	-
K01318	9.92e-06	9.92e-06	0	0	4.55e-06	4.28e-06	1e-05	1.09e-05	7.3e-06	9.37e-06	9.86e-06	5.67e-06	0	6.07e-06	4.07e-06	6.3e-06	9.62e-06	5.92e-06	0.999508	0.999508	-0.000278447
K06295	0.000302519	0.000370257	0.000304917	0.000327958	0.000350456	0.000333637	0.000276901	0.000250218	0.000273645	0.000351199	0.000399341	0.000311988	0.000252256	0.000297514	0.000232175	0.000302538	0.000264456	0.000378875	0.999372	0.999508	0.00134291
K01668	0	3.31e-06	0	0	0	0	0	5.44e-06	0	0	0	0	4.67e-06	0	4.07e-06	0	0	0	0.999059	0.999467	0.0001569
K01142	0.000699266	0.000690925	0.000709956	0.00074536	0.000659949	0.000744267	0.000713938	0.000609225	0.000726071	0.000730494	0.00069515	0.000663683	0.000700712	0.000667889	0.000741332	0.000743738	0.000663544	0.000692631	0.99895	0.999467	-0.00650906
K00187	0	9.92e-06	1.37e-05	4.26e-06	4.55e-06	0	1.67e-05	5.44e-06	1.09e-05	9.37e-06	4.93e-06	1.13e-05	0	6.07e-06	0	6.3e-06	9.62e-06	1.78e-05	0.997418	0.998234	0.00110445
K01419	0.000262845	0.000294222	0.000268509	0.000238515	0.000213914	0.000171096	0.000293582	0.000190383	0.000269996	0.000243498	0.000285948	0.00024959	0.000205542	0.000279299	0.000146637	0.000302538	0.000163482	0.000325596	0.996792	0.997811	0.00492732
K10974	5.46e-05	7.93e-05	8.19e-05	3.41e-05	4.55e-05	4.71e-05	9.34e-05	7.62e-05	6.57e-05	7.49e-05	5.92e-05	7.37e-05	4.2e-05	8.5e-05	4.07e-05	7.56e-05	4.33e-05	8.29e-05	0.99514	0.996361	0.00552792
K03098	9.92e-06	1.32e-05	2.28e-05	1.28e-05	1.37e-05	0	1.33e-05	1.63e-05	1.09e-05	4.68e-06	1.48e-05	1.13e-05	9.34e-06	1.82e-05	8.15e-06	2.52e-05	9.62e-06	1.18e-05	0.994808	0.996232	-0.00363045
K06933	0	3.31e-06	4.55e-06	0	0	0	0	0	3.65e-06	0	0	5.67e-06	0	0	0	0	0	5.92e-06	0.993478	0.995105	-0.00124397
K09119	4.96e-06	9.92e-06	9.1e-06	4.26e-06	4.55e-06	8.55e-06	1.33e-05	1.09e-05	1.46e-05	9.37e-06	4.93e-06	1.7e-05	9.34e-06	6.07e-06	4.07e-06	1.26e-05	4.81e-06	1.18e-05	0.993176	0.995005	0.00503592
K03382	0	0	4.55e-06	4.26e-06	0	0	0	0	3.65e-06	0	0	0	0	6.07e-06	0	6.3e-06	0	0	0.993142	0.995005	0.00131437
K21279	0	6.61e-06	0	4.26e-06	4.55e-06	4.28e-06	3.34e-06	0	3.65e-06	4.68e-06	4.93e-06	0	0	6.07e-06	0	6.3e-06	4.81e-06	0	0.993012	0.995005	-0.00264517
K02052	4.46e-05	1.65e-05	5.01e-05	4.26e-05	4.55e-05	3.85e-05	4.34e-05	4.9e-05	4.38e-05	3.75e-05	3.94e-05	3.4e-05	3.74e-05	6.07e-05	4.48e-05	5.04e-05	2.88e-05	4.14e-05	0.992385	0.994824	-0.0109897
K04029	0.000168617	0.000198352	0.000186591	0.000170368	0.000136541	0.000183928	0.000100085	0.00022846	0.000120404	0.000173258	0.000138044	0.000102105	0.000219556	0.000109291	0.000264761	0.000113452	0.000240415	0.000130238	0.992081	0.994723	0.00851538
K02888	0.00120016	0.00116036	0.00117871	0.00119684	0.0011697	0.00115917	0.00117433	0.0010607	0.00121498	0.00116598	0.00124733	0.00117421	0.00123325	0.00115363	0.00101424	0.00117233	0.00114918	0.00120766	0.990732	0.993573	-0.0639659
K06936	9.92e-06	9.92e-06	1.82e-05	1.28e-05	1.37e-05	1.28e-05	2e-05	1.09e-05	1.82e-05	4.68e-06	1.97e-05	2.27e-05	9.34e-06	1.82e-05	4.07e-06	1.89e-05	4.81e-06	2.37e-05	0.990144	0.993188	0.00730846
K07017	4.96e-06	6.61e-06	1.82e-05	1.28e-05	1.37e-05	1.71e-05	1.33e-05	2.18e-05	0	9.37e-06	4.93e-06	5.67e-06	1.87e-05	1.21e-05	2.85e-05	1.89e-05	4.81e-06	5.92e-06	0.989606	0.992851	-0.00553234
K00845	0.00133902	0.00122978	0.00125153	0.00126924	0.00122432	0.0012875	0.00126774	0.00122389	0.00126971	0.00125964	0.00130649	0.00129333	0.00126595	0.00129935	0.00122198	0.00120385	0.00136075	0.00115439	0.989139	0.992587	-0.0909743
K01887	0.000937314	0.0009587	0.000887445	0.000958319	0.00101496	0.000932473	0.00087741	0.000881201	0.000912149	0.000945897	0.000926866	0.000941636	0.000943625	0.00091683	0.000896116	0.000939127	0.000894343	0.000953108	0.987315	0.990959	0.112641
K02890	0.00122992	0.00125953	0.00126063	0.00124369	0.00122887	0.00123189	0.00121436	0.0011423	0.00122593	0.00127368	0.0012424	0.00117988	0.0012426	0.00117184	0.00112422	0.00124797	0.00122612	0.00133198	0.986738	0.990582	-0.110127
K00086	0	0	0	0	4.55e-06	0	0	0	0	0	0	0	4.67e-06	0	0	0	0	0	0.985544	0.989587	-0.00162659
K01646	0.00014878	0.000185128	0.000159285	0.000174627	0.000127438	0.000141154	0.000153463	0.000141427	0.000171484	0.000173258	0.000152834	0.000141813	0.000172842	0.000127506	0.000158857	0.00013236	0.000173099	0.000171678	0.985361	0.989587	-0.0417063
K10682	0	0	4.55e-06	0	0	0	0	0	0	4.68e-06	0	0	0	0	0	0	0	0	0.984356	0.9888	-0.00176017
K03438	0.00122	0.00120003	0.00119236	0.0011798	0.00120611	0.00122334	0.00115765	0.00110422	0.00112377	0.00120812	0.0011783	0.00116286	0.00117252	0.00112327	0.00116902	0.00114712	0.00123573	0.00121359	0.984303	0.9888	-0.161658
K17363	3.47e-05	9.92e-06	4.55e-06	8.52e-06	4.55e-06	8.55e-06	2e-05	1.09e-05	2.19e-05	1.4e-05	9.86e-06	1.7e-05	2.34e-05	6.07e-06	1.63e-05	6.3e-06	2.4e-05	5.92e-06	0.984161	0.9888	0.00846382
K02074	4.96e-06	3.31e-06	4.55e-06	0	9.1e-06	0	3.34e-06	5.44e-06	7.3e-06	4.68e-06	0	5.67e-06	4.67e-06	6.07e-06	0	0	4.81e-06	1.18e-05	0.983875	0.9888	0.0066463
K13641	0	3.31e-06	4.55e-06	4.26e-06	0	0	1e-05	0	7.3e-06	4.68e-06	9.86e-06	5.67e-06	0	0	4.07e-06	0	4.81e-06	0	0.982885	0.988133	0.0052614
K08984	0	3.31e-06	4.55e-06	0	0	4.28e-06	6.67e-06	0	7.3e-06	0	0	0	9.34e-06	6.07e-06	4.07e-06	6.3e-06	0	0	0.981709	0.987154	0.00532939
K02781	1.49e-05	2.31e-05	9.1e-06	2.13e-05	1.37e-05	1.28e-05	1e-05	5.44e-06	1.09e-05	4.68e-06	1.97e-05	1.7e-05	1.4e-05	1.82e-05	1.22e-05	6.3e-06	4.81e-06	2.37e-05	0.981012	0.986656	0.0135885
K02347	4.96e-06	0	0	0	0	0	1.33e-05	5.44e-06	3.65e-06	4.68e-06	0	0	0	6.07e-06	0	6.3e-06	4.81e-06	5.92e-06	0.979102	0.984938	-0.00567238
K03550	0.00119024	0.00121656	0.00120601	0.00120961	0.00123797	0.00123617	0.00118767	0.00112054	0.00121498	0.00125027	0.00120295	0.00126497	0.0011445	0.00123256	0.00110793	0.00122906	0.00119246	0.0011899	0.977997	0.984028	0.205329
K02076	4.96e-06	3.31e-06	0	0	9.1e-06	0	3.34e-06	0	0	4.68e-06	0	5.67e-06	0	0	0	0	4.81e-06	5.92e-06	0.977226	0.983454	-0.00593511
K03923	9.92e-06	9.92e-06	9.1e-06	8.52e-06	9.1e-06	4.28e-06	1e-05	1.09e-05	1.09e-05	4.68e-06	4.93e-06	1.13e-05	1.4e-05	1.21e-05	8.15e-06	1.26e-05	1.44e-05	0	0.976612	0.983039	0.0190265
K03492	0	9.92e-06	9.1e-06	8.52e-06	4.55e-06	8.55e-06	6.67e-06	0	3.65e-06	4.68e-06	4.93e-06	0	0	1.21e-05	0	1.89e-05	9.62e-06	0	0.9753	0.981919	0.00856857
K01493	0.00126463	0.00125292	0.00122877	0.00118832	0.00118336	0.00123189	0.00119101	0.00109878	0.00123323	0.00126432	0.00127691	0.00118555	0.00122391	0.0011597	0.00112829	0.00125427	0.00120688	0.00116623	0.975052	0.981872	0.200164
K04783	0	3.31e-06	4.55e-06	0	4.55e-06	4.28e-06	0	0	0	0	0	0	4.67e-06	6.07e-06	0	6.3e-06	0	0	0.974805	0.981826	-0.00619807
K02022	0	3.31e-06	4.55e-06	4.26e-06	4.55e-06	4.28e-06	0	0	0	0	4.93e-06	5.67e-06	0	0	0	0	4.81e-06	5.92e-06	0.972429	0.979634	-0.00856992
K07775	9.92e-06	1.65e-05	2.28e-05	8.52e-06	9.1e-06	1.71e-05	2e-05	1.09e-05	1.46e-05	0	9.86e-06	1.13e-05	4.2e-05	6.07e-06	3.67e-05	6.3e-06	9.62e-06	5.92e-06	0.971888	0.97929	0.0123337
K02477	0.000153739	0.00015207	0.000168387	0.000187405	0.000150195	0.000158264	0.000140119	0.000157746	0.000175133	0.000135797	0.000187345	0.00018152	0.000121457	0.000230725	0.000138491	0.000207995	0.000120207	0.000124318	0.971518	0.979119	-0.0495375
K00186	0	3.31e-06	1.37e-05	0	0	0	3.34e-06	0	7.3e-06	4.68e-06	0	5.67e-06	0	0	0	0	4.81e-06	1.18e-05	0.97116	0.97896	0.00667026
K11103	4.96e-06	6.61e-06	9.1e-06	8.52e-06	9.1e-06	4.28e-06	6.67e-06	5.44e-06	7.3e-06	9.37e-06	0	0	4.67e-06	1.21e-05	8.15e-06	1.26e-05	1.44e-05	0	0.970332	0.978327	0.0159339
K03495	0.000952192	0.000962006	0.000860139	0.000873136	0.00099675	0.000881144	0.000914107	0.000848564	0.000897555	0.000964627	0.000867705	0.000913273	0.000952968	0.000856112	0.000900189	0.000939127	0.000860685	0.000923509	0.970166	0.978327	0.199496
K03070	0.000867883	0.000859524	0.000787323	0.000813507	0.000901172	0.000778486	0.000827367	0.000750653	0.000769854	0.000889705	0.000774032	0.000788478	0.000822169	0.000795395	0.000830944	0.000743738	0.000802985	0.000899829	0.969182	0.97757	0.16659
K13934	0	3.31e-06	0	4.26e-06	4.55e-06	4.28e-06	3.34e-06	5.44e-06	3.65e-06	0	0	0	0	1.21e-05	0	1.26e-05	4.81e-06	0	0.968859	0.977446	-0.00843084
K15534	3.47e-05	3.31e-05	1.82e-05	2.56e-05	1.37e-05	1.28e-05	2.34e-05	3.26e-05	2.55e-05	1.4e-05	2.96e-05	2.84e-05	1.87e-05	1.82e-05	5.3e-05	1.89e-05	2.88e-05	1.18e-05	0.968485	0.97727	-0.0246584
K00578	0	3.31e-06	4.55e-06	0	0	0	3.34e-06	0	0	0	0	5.67e-06	0	0	0	0	0	5.92e-06	0.967946	0.976927	-0.00608446
K01499	0	3.31e-06	4.55e-06	0	0	0	3.34e-06	0	0	0	0	5.67e-06	0	0	0	0	0	5.92e-06	0.967946	0.976927	-0.00608446
K06865	0	3.31e-06	4.55e-06	0	0	0	3.34e-06	0	0	0	0	5.67e-06	0	0	0	0	0	5.92e-06	0.967946	0.976927	-0.00608446
K14096	0	3.31e-06	4.55e-06	0	0	0	3.34e-06	0	0	0	0	5.67e-06	0	0	0	0	0	5.92e-06	0.967946	0.976927	-0.00608446
K13574	4.96e-06	0	0	0	0	0	0	0	0	4.68e-06	0	0	0	0	0	0	0	0	0.967757	0.976927	0.00362726
K01745	0.000153739	0.000155375	0.000172938	0.000119258	9.1e-05	0.000128322	0.000133446	0.000168625	0.000116755	0.000131114	0.000142974	0.00011345	0.000172842	0.000151793	0.000138491	0.000126057	0.000110591	0.000147998	0.96745	0.976927	0.0640595
K03522	0.000337235	0.00034381	0.00040959	0.00037055	0.000368661	0.000359301	0.000440373	0.000413403	0.000412291	0.00036993	0.000374691	0.000391403	0.000359699	0.000394662	0.000391032	0.000415989	0.000360622	0.000402555	0.965573	0.975739	-0.154722
K02624	4.96e-06	0	4.55e-06	4.26e-06	0	4.28e-06	0	0	0	4.68e-06	9.86e-06	0	0	0	4.07e-06	0	0	0	0.965303	0.975667	-0.00798733
K06296	0	2.64e-05	2.73e-05	2.56e-05	2.73e-05	2.99e-05	1.67e-05	1.63e-05	1.82e-05	2.34e-05	3.94e-05	2.27e-05	2.34e-05	1.21e-05	1.22e-05	2.52e-05	1.92e-05	1.18e-05	0.96527	0.975667	-0.0271161
K01685	0.000228129	0.00024794	0.000195693	0.000234256	0.000213914	0.000205315	0.000250212	0.000271976	0.000226213	0.000215402	0.000207066	0.000255263	0.000242913	0.000230725	0.000276981	0.000239509	0.000211565	0.000189438	0.965254	0.975667	0.105905
K18979	0.000173577	0.000155375	0.000177489	0.000127776	0.000122887	0.000141154	0.000143455	0.000157746	0.000127701	0.000154528	0.000162695	0.000141813	0.000163499	0.000151793	0.000134417	0.000170177	0.000139441	0.000112479	0.96406	0.975015	-0.0945061
K21746	4.96e-06	9.92e-06	4.55e-06	4.26e-06	0	0	3.34e-06	5.44e-06	3.65e-06	0	0	0	1.4e-05	0	1.63e-05	0	4.81e-06	0	0.963464	0.974614	0.00954155
K02887	0.00112577	0.00115044	0.00122422	0.00118832	0.00124708	0.00112496	0.0011076	0.00101719	0.00111647	0.00114725	0.00120295	0.0011345	0.0011118	0.00111112	0.00107127	0.00117864	0.0011011	0.00123135	0.963401	0.974614	0.23169
K03093	4.96e-06	3.31e-06	9.1e-06	1.28e-05	1.82e-05	8.55e-06	2e-05	2.18e-05	1.82e-05	9.37e-06	1.97e-05	1.7e-05	0	2.43e-05	1.22e-05	2.52e-05	4.81e-06	5.92e-06	0.963218	0.974614	-0.020431
K01894	9.92e-06	3.31e-06	1.82e-05	8.52e-06	4.55e-06	8.55e-06	1e-05	1.09e-05	1.09e-05	9.37e-06	4.93e-06	5.67e-06	9.34e-06	1.21e-05	8.15e-06	1.89e-05	9.62e-06	5.92e-06	0.963035	0.974614	0.0275108
K03924	0.000733981	0.000753736	0.000800976	0.000839062	0.000832901	0.000812706	0.00076398	0.000832245	0.000809988	0.000772638	0.000872635	0.000918946	0.000696041	0.000837897	0.000733186	0.000819372	0.000687586	0.00082879	0.962961	0.974614	0.159791
K02970	0.00110593	0.00104465	0.00111044	0.00107332	0.00105137	0.00105224	0.00104422	0.000973673	0.00102161	0.00106296	0.00109942	0.000975671	0.00113515	0.00113541	0.000981654	0.00103367	0.00103378	0.00103007	0.962663	0.974614	-0.259064
K17818	1.98e-05	1.65e-05	9.1e-06	8.52e-06	1.37e-05	2.14e-05	1e-05	2.72e-05	7.3e-06	9.37e-06	1.48e-05	1.7e-05	2.34e-05	6.07e-06	2.85e-05	1.26e-05	1.44e-05	5.92e-06	0.962563	0.974614	0.0258402
K20415	0	3.31e-06	0	4.26e-06	4.55e-06	4.28e-06	3.34e-06	0	3.65e-06	0	0	5.67e-06	0	6.07e-06	0	6.3e-06	4.81e-06	0	0.961103	0.973634	0.0131317
K00329	4.96e-06	0	4.55e-06	0	0	0	0	5.44e-06	0	4.68e-06	4.93e-06	0	0	0	0	0	4.81e-06	0	0.96002	0.972739	0.00897832
K00356	4.96e-06	0	4.55e-06	0	0	0	0	5.44e-06	0	4.68e-06	4.93e-06	0	0	0	0	0	4.81e-06	0	0.96002	0.972739	0.00897832
K00625	0.000679429	0.000684313	0.000700854	0.000715545	0.000723668	0.000701493	0.000620525	0.000614665	0.000682288	0.000735177	0.000754311	0.000601285	0.000705383	0.000655746	0.000741332	0.000623984	0.000658736	0.000657112	0.959728	0.972739	-0.195881
K03301	4.96e-06	1.32e-05	1.37e-05	2.56e-05	2.28e-05	4.28e-06	6.67e-06	5.44e-06	7.3e-06	9.37e-06	1.48e-05	0	1.4e-05	1.82e-05	1.63e-05	1.89e-05	4.81e-06	5.92e-06	0.958331	0.97163	0.0220019
K13005	0	1.32e-05	0	8.52e-06	9.1e-06	0	1e-05	5.44e-06	0	4.68e-06	4.93e-06	5.67e-06	4.67e-06	6.07e-06	4.07e-06	6.3e-06	4.81e-06	5.92e-06	0.957674	0.971165	-0.0197196
K01147	2.98e-05	1.65e-05	3.64e-05	1.28e-05	1.82e-05	1.71e-05	2.34e-05	2.72e-05	2.92e-05	1.87e-05	2.96e-05	1.7e-05	1.4e-05	3.64e-05	1.22e-05	3.78e-05	1.92e-05	2.37e-05	0.957151	0.970836	0.0390132
K00579	0	6.61e-06	0	0	0	0	6.67e-06	0	3.65e-06	4.68e-06	0	5.67e-06	0	0	0	0	0	5.92e-06	0.957044	0.970836	0.00941002
K07171	0.00142829	0.00142483	0.00138806	0.00156738	0.00154747	0.00154842	0.00138451	0.00144147	0.00134268	0.00155464	0.0014889	0.00147485	0.00151821	0.00129935	0.00136047	0.0013299	0.00148095	0.0015451	0.956897	0.970836	0.237495
K15521	0	0	4.55e-06	0	0	0	0	0	0	0	4.93e-06	0	0	0	0	0	0	0	0.955531	0.969796	-0.00500151
K12986	0	3.31e-06	4.55e-06	4.26e-06	4.55e-06	0	0	0	0	0	4.93e-06	0	0	6.07e-06	0	6.3e-06	0	0	0.954966	0.969424	-0.0110869
K06313	2.98e-05	1.32e-05	1.37e-05	2.13e-05	2.28e-05	2.57e-05	2.34e-05	1.09e-05	2.19e-05	3.28e-05	1.97e-05	2.27e-05	2.34e-05	1.21e-05	2.44e-05	1.26e-05	9.62e-06	2.37e-05	0.954947	0.969424	0.0445533
K20448	0	0	1.37e-05	4.26e-06	4.55e-06	4.28e-06	1e-05	1.09e-05	1.46e-05	1.4e-05	1.48e-05	5.67e-06	4.67e-06	1.21e-05	0	0	9.62e-06	0	0.954542	0.969394	0.0180433
K07448	0.000183495	0.000158681	0.000159285	0.000144813	0.000168401	0.000171096	0.000170144	0.000146867	0.000175133	0.000135797	0.000182415	0.000209883	0.000135471	0.000163936	0.000134417	0.000163874	0.000163482	0.000183518	0.95345	0.968486	0.126573
K15669	1.98e-05	2.64e-05	1.82e-05	1.28e-05	1.37e-05	1.71e-05	2.34e-05	1.63e-05	1.82e-05	0	1.97e-05	1.7e-05	1.87e-05	3.04e-05	1.63e-05	3.15e-05	4.81e-06	2.96e-05	0.953385	0.968486	-0.034866
K03043	0.0007439	0.000750431	0.000696303	0.000681472	0.000778284	0.000692938	0.000683912	0.000718016	0.000689585	0.000721129	0.000645848	0.000686373	0.000766112	0.000746821	0.000684307	0.000743738	0.000697203	0.000734071	0.953234	0.968486	0.308677
K00055	0	6.61e-06	4.55e-06	8.52e-06	2.28e-05	0	3.34e-06	5.44e-06	7.3e-06	4.68e-06	4.93e-06	1.13e-05	0	1.21e-05	4.07e-06	6.3e-06	4.81e-06	1.18e-05	0.953084	0.968486	-0.0185025
K03100	0.00188455	0.00181161	0.00190687	0.0019209	0.00186606	0.00199327	0.00185824	0.00190383	0.00200673	0.00192457	0.00194247	0.00197403	0.00197601	0.00172437	0.0019796	0.00174589	0.00198102	0.00188254	0.952473	0.968298	0.364404
K01507	0.000649673	0.000763654	0.000582528	0.000626102	0.000669052	0.000611668	0.000660559	0.00056027	0.000671342	0.000664937	0.000749381	0.00063532	0.000644655	0.000607172	0.000541743	0.000611378	0.000610653	0.000745911	0.952353	0.968298	-0.163886
K03527	0.000912517	0.000783489	0.000746364	0.000792211	0.000814695	0.000846925	0.000783997	0.000826806	0.000842826	0.000842878	0.000877565	0.000794151	0.00082684	0.000801467	0.000794284	0.00076895	0.000879918	0.00077551	0.951681	0.967895	-0.29684
K08194	0	0	0	0	0	4.28e-06	0	0	0	0	0	0	4.67e-06	0	0	0	0	0	0.951671	0.967895	-0.00543532
K08971	4.96e-06	9.92e-06	4.55e-06	4.26e-06	4.55e-06	8.55e-06	1.33e-05	1.09e-05	7.3e-06	9.37e-06	4.93e-06	1.13e-05	4.67e-06	6.07e-06	4.07e-06	6.3e-06	4.81e-06	1.78e-05	0.95152	0.967895	-0.0318411
K01823	6.45e-05	6.28e-05	3.64e-05	2.56e-05	2.28e-05	5.13e-05	6.67e-05	3.81e-05	5.11e-05	5.15e-05	3.94e-05	3.97e-05	5.61e-05	4.25e-05	4.07e-05	3.78e-05	3.85e-05	7.7e-05	0.951514	0.967895	-0.0514969
K00996	4.96e-06	3.31e-06	0	8.52e-06	9.1e-06	8.55e-06	6.67e-06	0	0	4.68e-06	4.93e-06	0	9.34e-06	6.07e-06	4.07e-06	6.3e-06	4.81e-06	0	0.951254	0.967895	0.0215294
K07271	0.000679429	0.000499185	0.000623487	0.000681472	0.000646295	0.000573171	0.000597172	0.000652742	0.000609316	0.000590015	0.000601477	0.00058994	0.000668012	0.000582885	0.0007006	0.000605075	0.000653928	0.000556473	0.95114	0.967895	0.194008
K18785	0.000138861	0.000155375	0.000113775	0.000127776	0.000145644	0.000166819	0.000146791	0.000152306	0.000153241	0.00014048	0.000123253	0.000164503	0.0001308	0.000145721	0.000154784	0.000157572	0.000163482	0.000124318	0.950102	0.967495	-0.152106
K22757	2.48e-05	4.96e-05	4.1e-05	2.98e-05	3.19e-05	3.85e-05	3e-05	3.81e-05	3.65e-05	4.21e-05	2.96e-05	2.27e-05	3.74e-05	5.46e-05	3.26e-05	4.41e-05	2.4e-05	3.55e-05	0.949965	0.967495	-0.0679965
K05792	4.96e-06	3.31e-06	4.55e-06	8.52e-06	1.37e-05	1.71e-05	3.34e-06	5.44e-06	7.3e-06	0	4.93e-06	1.13e-05	4.67e-06	1.21e-05	1.22e-05	1.26e-05	0	1.18e-05	0.949849	0.967495	-0.0254729
K05841	0	0	0	4.26e-06	4.55e-06	4.28e-06	0	5.44e-06	0	0	0	5.67e-06	4.67e-06	0	4.07e-06	0	4.81e-06	0	0.949246	0.967227	-0.0142921
K05796	1.49e-05	6.61e-06	4.55e-06	2.13e-05	9.1e-06	4.28e-06	1.33e-05	5.44e-06	3.65e-06	1.87e-05	9.86e-06	1.13e-05	4.67e-06	6.07e-06	8.15e-06	6.3e-06	4.81e-06	1.18e-05	0.948944	0.967121	0.0296351
K01465	0.000763737	0.000780183	0.000841935	0.000787952	0.000801041	0.000816983	0.00076398	0.000881201	0.000788097	0.000885022	0.00070008	0.000777133	0.00079414	0.000771108	0.000944995	0.000806767	0.000812602	0.000716311	0.948221	0.966586	0.231517
K17816	0	3.31e-06	4.55e-06	4.26e-06	9.1e-06	4.28e-06	3.34e-06	0	3.65e-06	4.68e-06	4.93e-06	5.67e-06	0	6.07e-06	4.07e-06	6.3e-06	0	0	0.947497	0.966048	0.0233137
K08972	6.45e-05	8.93e-05	7.74e-05	7.67e-05	7.28e-05	4.71e-05	6.01e-05	5.44e-05	5.47e-05	7.02e-05	5.92e-05	4.54e-05	7.01e-05	8.5e-05	3.67e-05	9.45e-05	4.81e-05	8.29e-05	0.94672	0.965457	0.0698706
K13950	0	0	0	4.26e-06	4.55e-06	4.28e-06	0	0	0	0	0	0	0	6.07e-06	0	6.3e-06	0	0	0.946088	0.965013	0.0104246
K19141	9.92e-06	3.31e-06	9.1e-06	4.26e-06	4.55e-06	4.28e-06	6.67e-06	0	7.3e-06	0	0	1.13e-05	4.67e-06	1.21e-05	4.07e-06	1.26e-05	0	5.92e-06	0.945488	0.964603	-0.0237449
K06203	4.96e-06	6.61e-06	9.1e-06	4.26e-06	4.55e-06	4.28e-06	3.34e-06	0	0	0	0	0	4.67e-06	6.07e-06	4.07e-06	1.26e-05	4.81e-06	5.92e-06	0.945175	0.964484	-0.0220574
K07583	4.96e-06	1.32e-05	1.37e-05	4.26e-06	4.55e-06	8.55e-06	1.33e-05	1.09e-05	1.46e-05	9.37e-06	9.86e-06	1.13e-05	4.67e-06	1.82e-05	4.07e-06	1.26e-05	4.81e-06	1.18e-05	0.944147	0.963636	0.0412557
K15257	4.96e-06	3.31e-06	9.1e-06	4.26e-06	4.55e-06	0	6.67e-06	0	7.3e-06	4.68e-06	0	5.67e-06	4.67e-06	6.07e-06	4.07e-06	6.3e-06	9.62e-06	0	0.943792	0.963475	-0.0279926
K11618	0	0	0	4.26e-06	4.55e-06	0	0	0	0	0	0	0	0	0	0	0	9.62e-06	0	0.943491	0.963369	-0.00737041
K05916	4.96e-06	6.61e-06	4.55e-06	1.28e-05	4.55e-06	4.28e-06	3.34e-06	0	3.65e-06	0	0	0	9.34e-06	6.07e-06	4.07e-06	1.89e-05	4.81e-06	0	0.943198	0.96327	0.0185678
K02238	0.000962111	0.000922335	0.00081918	0.000924246	0.00099675	0.000928195	0.000914107	0.000794169	0.000872015	0.000889705	0.000897285	0.000941636	0.000948297	0.000928973	0.000892042	0.000895007	0.000855876	0.000899829	0.942847	0.963112	-0.347146
K22585	9.92e-06	1.65e-05	9.1e-06	8.52e-06	9.1e-06	8.55e-06	1.33e-05	1.63e-05	1.09e-05	9.37e-06	9.86e-06	1.7e-05	9.34e-06	1.21e-05	8.15e-06	1.26e-05	4.81e-06	1.78e-05	0.942364	0.96282	0.059039
K09473	0	0	0	0	4.55e-06	0	3.34e-06	0	3.65e-06	0	4.93e-06	0	0	0	0	0	0	5.92e-06	0.941691	0.962333	0.0111929
K03664	0.00120512	0.00121986	0.00119236	0.00112869	0.00119246	0.00120195	0.00116766	0.00105526	0.00123323	0.00120812	0.00117337	0.00122526	0.00116318	0.00119006	0.00111607	0.00119754	0.00112995	0.00117807	0.940105	0.960914	0.515373
K19116	1.49e-05	3.31e-06	4.55e-06	8.52e-06	9.1e-06	2.57e-05	0	5.44e-06	3.65e-06	9.37e-06	0	0	9.34e-06	1.82e-05	1.22e-05	1.89e-05	9.62e-06	0	0.939994	0.960914	-0.0226926
K03720	3.47e-05	2.64e-05	3.19e-05	1.28e-05	3.19e-05	2.14e-05	3.67e-05	3.81e-05	4.01e-05	1.87e-05	4.93e-05	2.84e-05	1.4e-05	4.86e-05	1.22e-05	4.41e-05	1.92e-05	3.55e-05	0.939468	0.960664	0.0505614
K21134	0	0	4.55e-06	0	0	0	0	5.44e-06	0	4.68e-06	0	0	0	6.07e-06	0	0	0	0	0.939056	0.960443	-0.0102845
K11646	4.96e-06	1.65e-05	4.55e-06	4.26e-06	4.55e-06	4.28e-06	1.33e-05	2.18e-05	1.46e-05	9.37e-06	9.86e-06	1.13e-05	4.67e-06	1.21e-05	4.07e-06	1.89e-05	4.81e-06	1.18e-05	0.939001	0.960443	0.0345453
K07505	4.96e-06	9.92e-06	1.82e-05	4.26e-06	9.1e-06	8.55e-06	2e-05	5.44e-06	1.09e-05	1.87e-05	4.93e-06	5.67e-06	0	2.43e-05	1.22e-05	6.3e-06	9.62e-06	1.18e-05	0.938548	0.960325	-0.0323434
K02357	0.00105634	0.00110085	0.00107859	0.00105202	0.00105137	0.000962415	0.00103421	0.000935596	0.00102526	0.00106765	0.00106984	0.000998361	0.00101837	0.00107469	0.000944995	0.00107779	0.000990508	0.00107151	0.937779	0.959738	-0.428382
K07776	3.47e-05	1.98e-05	3.64e-05	2.13e-05	2.73e-05	2.57e-05	4e-05	1.63e-05	3.65e-05	1.87e-05	3.94e-05	1.7e-05	1.4e-05	5.46e-05	2.44e-05	4.41e-05	1.44e-05	3.55e-05	0.937106	0.95925	-0.050921
K15855	4.96e-06	0	0	0	0	4.28e-06	3.34e-06	5.44e-06	3.65e-06	0	4.93e-06	5.67e-06	0	6.07e-06	0	0	0	5.92e-06	0.936935	0.95925	-0.0194168
K07714	9.92e-06	0	4.55e-06	0	9.1e-06	8.55e-06	1.67e-05	1.63e-05	1.46e-05	4.68e-06	1.48e-05	5.67e-06	9.34e-06	6.07e-06	8.15e-06	1.26e-05	4.81e-06	1.18e-05	0.936285	0.958811	0.0360802
K00801	1.49e-05	6.61e-06	2.28e-05	8.52e-06	4.55e-06	8.55e-06	6.67e-06	1.63e-05	1.09e-05	9.37e-06	4.93e-06	1.13e-05	9.34e-06	1.82e-05	8.15e-06	1.89e-05	9.62e-06	1.18e-05	0.936225	0.958811	-0.0459307
K03491	3.97e-05	2.64e-05	1.82e-05	2.13e-05	2.73e-05	2.57e-05	2e-05	1.63e-05	2.55e-05	1.87e-05	4.93e-06	2.27e-05	4.2e-05	1.21e-05	4.07e-05	1.89e-05	5.29e-05	1.18e-05	0.936218	0.958811	-0.0424422
K21394	1.98e-05	2.98e-05	3.64e-05	3.41e-05	3.19e-05	4.71e-05	4.67e-05	6.53e-05	4.74e-05	4.21e-05	3.45e-05	2.84e-05	3.74e-05	3.64e-05	4.07e-05	3.78e-05	6.73e-05	2.96e-05	0.93586	0.958811	0.0691994
K09776	0	6.61e-06	0	0	9.1e-06	4.28e-06	0	0	0	0	0	0	4.67e-06	6.07e-06	4.07e-06	6.3e-06	0	0	0.935661	0.958811	-0.0154164
K07034	9.92e-06	3.31e-05	1.37e-05	1.7e-05	1.37e-05	2.57e-05	1.67e-05	3.81e-05	1.82e-05	1.87e-05	2.96e-05	1.7e-05	2.34e-05	2.43e-05	1.22e-05	1.89e-05	9.62e-06	3.55e-05	0.935531	0.958811	-0.0510721
K07254	9.92e-06	1.32e-05	9.1e-06	4.26e-06	4.55e-06	8.55e-06	1.33e-05	1.09e-05	1.82e-05	4.68e-06	9.86e-06	1.7e-05	4.67e-06	1.21e-05	4.07e-06	1.89e-05	4.81e-06	1.78e-05	0.934478	0.958163	-0.0424032
K07055	4.96e-06	9.92e-06	9.1e-06	4.26e-06	4.55e-06	8.55e-06	1e-05	1.09e-05	7.3e-06	4.68e-06	4.93e-06	1.13e-05	4.67e-06	6.07e-06	4.07e-06	1.26e-05	4.81e-06	1.78e-05	0.933827	0.957696	-0.0449149
K06998	0	3.31e-06	0	0	0	4.28e-06	3.34e-06	5.44e-06	0	0	4.93e-06	0	0	6.07e-06	0	6.3e-06	0	0	0.933757	0.957696	-0.0161252
K01582	3.47e-05	2.98e-05	2.73e-05	1.7e-05	1.82e-05	8.55e-06	6.67e-06	2.72e-05	1.46e-05	9.37e-06	1.97e-05	2.84e-05	1.87e-05	2.43e-05	2.44e-05	2.52e-05	1.92e-05	1.18e-05	0.933715	0.957696	0.0551915
K00613	0	6.61e-06	0	0	4.55e-06	4.28e-06	3.34e-06	5.44e-06	3.65e-06	0	4.93e-06	5.67e-06	0	6.07e-06	0	6.3e-06	0	5.92e-06	0.932731	0.957174	-0.0255601
K02483	3.47e-05	3.97e-05	4.1e-05	4.26e-05	4.55e-05	1.71e-05	6.01e-05	6.53e-05	5.84e-05	5.62e-05	2.96e-05	3.4e-05	4.67e-05	5.46e-05	4.89e-05	5.67e-05	5.29e-05	2.96e-05	0.932697	0.957174	-0.077935
K07492	0	0	0	0	0	0	0	5.44e-06	0	0	0	0	0	0	0	0	4.81e-06	0	0.93194	0.956763	0.00765041
K01281	0	6.61e-06	1.37e-05	1.28e-05	4.55e-06	0	3.34e-06	5.44e-06	7.3e-06	4.68e-06	0	5.67e-06	4.67e-06	6.07e-06	8.15e-06	0	4.81e-06	1.78e-05	0.930922	0.955919	0.0270635
K22617	0	0	0	0	0	0	3.34e-06	0	3.65e-06	0	0	0	0	0	0	6.3e-06	0	0	0.930767	0.955919	0.00937253
K02974	4.96e-06	9.92e-06	9.1e-06	4.26e-06	9.1e-06	4.28e-06	1.67e-05	1.09e-05	1.46e-05	9.37e-06	9.86e-06	1.13e-05	9.34e-06	1.21e-05	4.07e-06	1.26e-05	4.81e-06	1.18e-05	0.930545	0.955919	-0.0579026
K05715	0	3.31e-06	0	0	0	0	0	0	7.3e-06	0	0	5.67e-06	0	0	0	0	0	5.92e-06	0.928937	0.954481	-0.0116149
K20116	0.000128943	9.59e-05	0.000104673	9.37e-05	0.000122887	0.000106935	6.67e-05	0.000130548	7.66e-05	7.96e-05	9.37e-05	9.64e-05	9.34e-05	9.11e-05	0.000171077	8.19e-05	0.000149057	5.92e-05	0.928459	0.95419	0.0836012
K02774	5.95e-05	5.29e-05	5.92e-05	5.11e-05	5.01e-05	4.28e-05	5e-05	5.44e-05	5.11e-05	2.34e-05	4.44e-05	6.24e-05	7.01e-05	5.46e-05	7.33e-05	4.41e-05	5.29e-05	4.14e-05	0.928311	0.95419	0.108737
K06020	4.96e-06	3.31e-06	4.55e-06	4.26e-06	4.55e-06	4.28e-06	3.34e-06	5.44e-06	3.65e-06	4.68e-06	0	0	9.34e-06	6.07e-06	8.15e-06	6.3e-06	4.81e-06	0	0.927916	0.954032	-0.0405841
K13059	5.46e-05	3.64e-05	5.01e-05	6.39e-05	5.01e-05	3.85e-05	4e-05	5.44e-05	4.74e-05	8.43e-05	5.92e-05	5.11e-05	4.67e-05	3.04e-05	4.48e-05	2.52e-05	5.77e-05	4.14e-05	0.927781	0.954032	-0.0859309
K03976	0.000848046	0.000770266	0.000755466	0.000809248	0.000705463	0.000761377	0.000794006	0.000832245	0.000769854	0.000805417	0.000823333	0.00077146	0.000766112	0.000807539	0.00082687	0.000750041	0.000740477	0.000769591	0.927759	0.954032	-0.502754
K03631	0.000853005	0.000763654	0.000778221	0.000804988	0.000819247	0.000761377	0.000787333	0.000788729	0.000784448	0.000838195	0.000764172	0.000782806	0.000798812	0.000752893	0.00083909	0.000743738	0.000827026	0.00078143	0.927366	0.954032	0.595327
K18347	4.96e-06	0	0	0	0	0	0	0	0	0	0	5.67e-06	0	0	0	0	0	0	0.926082	0.952948	-0.00830732
K09942	2.48e-05	1.65e-05	2.73e-05	1.28e-05	1.82e-05	2.14e-05	3e-05	1.63e-05	2.92e-05	1.4e-05	1.97e-05	1.7e-05	1.87e-05	3.64e-05	1.63e-05	3.78e-05	9.62e-06	2.37e-05	0.925577	0.952629	0.066833
K19419	0.000168617	0.00013554	0.000150183	0.000144813	0.000104682	0.00011549	0.000136782	0.000135988	0.000142295	0.000117066	0.000197206	0.00013614	0.000116785	0.000115363	0.000146637	9.45e-05	0.000134632	0.000165758	0.925281	0.952524	0.135294
K02356	0.00121008	0.00121656	0.00109679	0.00110739	0.00119246	0.00112496	0.00106757	0.00103351	0.00112012	0.00120812	0.00119309	0.0010721	0.00117252	0.00113541	0.00103461	0.00102106	0.00112995	0.00123135	0.924338	0.951753	-0.411276
K01845	0.000188455	0.000171905	0.000209346	0.000204441	0.000150195	0.000179651	0.000183489	0.000174064	0.000215267	0.000168576	0.000187345	0.00015883	0.000158828	0.000230725	0.000171077	0.000239509	0.000149057	0.000224957	0.922027	0.949573	-0.171918
K16698	0.000119024	8.93e-05	9.56e-05	0.000127776	0.000122887	0.000128322	0.000106757	0.000135988	0.000105809	9.83e-05	0.000123253	0.000119123	0.000149485	0.000103219	0.000146637	8.82e-05	0.000110591	0.000100639	0.921696	0.949433	-0.161558
K01729	9.92e-06	0	9.1e-06	0	4.55e-06	0	0	5.44e-06	0	0	4.93e-06	0	1.4e-05	0	1.22e-05	0	0	0	0.921584	0.949433	-0.0177202
K06162	4.96e-06	6.61e-06	9.1e-06	0	4.55e-06	4.28e-06	0	1.09e-05	3.65e-06	0	0	1.13e-05	4.67e-06	6.07e-06	8.15e-06	6.3e-06	0	5.92e-06	0.920797	0.948905	0.0335978
K20529	4.96e-06	6.61e-06	1.37e-05	4.26e-06	9.1e-06	4.28e-06	0	1.63e-05	0	0	4.93e-06	1.13e-05	0	1.21e-05	4.07e-06	1.26e-05	0	1.18e-05	0.92079	0.948905	0.0306823
K02796	7.93e-05	5.29e-05	3.64e-05	4.26e-05	1.37e-05	2.57e-05	3e-05	7.62e-05	4.01e-05	4.21e-05	2.47e-05	3.4e-05	5.61e-05	3.64e-05	4.48e-05	4.41e-05	7.69e-05	2.96e-05	0.920749	0.948905	0.0611302
K16958	2.98e-05	1.98e-05	2.28e-05	2.13e-05	3.64e-05	3.85e-05	3.34e-05	3.26e-05	2.92e-05	1.87e-05	2.47e-05	2.84e-05	4.2e-05	3.04e-05	3.67e-05	3.78e-05	2.4e-05	1.78e-05	0.920539	0.948905	0.101915
K13922	8.43e-05	0.000119011	8.19e-05	7.67e-05	0.00010013	0.000111212	7.34e-05	0.000163185	7.66e-05	0.000112384	8.38e-05	6.24e-05	0.000121457	5.46e-05	0.00016293	5.04e-05	0.00016829	5.33e-05	0.920038	0.948905	0.0675882
K00882	0.000396747	0.000360339	0.000368631	0.000413142	0.000450586	0.000449127	0.000356969	0.00045148	0.000404994	0.00044017	0.000384551	0.0004538	0.000425099	0.000327873	0.000496937	0.000346658	0.000480829	0.000319676	0.919698	0.948772	-0.203608
K01869	0.000853005	0.000826465	0.000782772	0.000792211	0.000851106	0.000769932	0.00076398	0.00078329	0.000751611	0.000805417	0.000778962	0.000743098	0.000864211	0.000819682	0.000786138	0.000781555	0.000730861	0.00084655	0.919059	0.948312	0.532986
K11939	0	0	0	0	0	0	0	5.44e-06	0	0	0	0	0	0	0	6.3e-06	0	0	0.918993	0.948312	-0.00910178
K03366	9.92e-06	3.31e-06	4.55e-06	4.26e-06	1.37e-05	1.28e-05	3.34e-06	1.63e-05	3.65e-06	1.4e-05	0	5.67e-06	4.67e-06	1.21e-05	4.07e-06	6.3e-06	9.62e-06	1.78e-05	0.917857	0.947472	-0.0417265
K19114	9.92e-06	3.31e-06	4.55e-06	8.52e-06	1.37e-05	1.71e-05	0	0	0	4.68e-06	0	0	9.34e-06	6.07e-06	1.22e-05	1.26e-05	9.62e-06	0	0.917347	0.947145	0.0299148
K02236	2.98e-05	6.28e-05	7.74e-05	4.26e-05	4.1e-05	5.56e-05	4.34e-05	4.9e-05	3.65e-05	2.81e-05	2.96e-05	6.81e-05	5.14e-05	7.89e-05	2.04e-05	7.56e-05	2.4e-05	7.1e-05	0.916906	0.94689	-0.069011
K07446	4.96e-06	1.32e-05	9.1e-06	4.26e-06	4.55e-06	8.55e-06	1.33e-05	1.09e-05	1.09e-05	4.68e-06	9.86e-06	1.7e-05	4.67e-06	1.21e-05	4.07e-06	1.26e-05	4.81e-06	1.18e-05	0.916857	0.94689	-0.0605979
K15034	1.49e-05	9.92e-06	2.28e-05	4.26e-06	9.1e-06	8.55e-06	2e-05	1.63e-05	1.46e-05	9.37e-06	1.48e-05	1.7e-05	4.67e-06	1.82e-05	4.07e-06	2.52e-05	0	2.37e-05	0.916778	0.94689	0.0488639
K11785	9.92e-06	1.32e-05	2.28e-05	8.52e-06	9.1e-06	4.28e-06	3.34e-06	1.09e-05	7.3e-06	9.37e-06	4.93e-06	5.67e-06	1.4e-05	1.21e-05	1.22e-05	1.89e-05	9.62e-06	0	0.915933	0.946484	0.0492282
K03635	9.92e-06	9.92e-06	1.37e-05	8.52e-06	1.37e-05	4.28e-06	2e-05	1.09e-05	1.46e-05	1.4e-05	4.93e-06	1.13e-05	1.4e-05	1.82e-05	1.22e-05	1.26e-05	1.44e-05	5.92e-06	0.913873	0.944554	-0.0799343
K19426	5.46e-05	1.98e-05	3.64e-05	2.13e-05	2.73e-05	2.14e-05	1.33e-05	4.35e-05	2.55e-05	3.75e-05	2.47e-05	1.7e-05	3.27e-05	1.21e-05	4.07e-05	2.52e-05	4.33e-05	3.55e-05	0.91387	0.944554	-0.0716085
K18285	9.92e-06	2.64e-05	2.28e-05	1.28e-05	2.28e-05	1.28e-05	1.33e-05	2.72e-05	1.46e-05	1.4e-05	4.93e-06	5.67e-06	2.34e-05	4.25e-05	2.04e-05	3.78e-05	1.92e-05	0	0.913649	0.944554	-0.0474458
K01708	1.49e-05	1.98e-05	9.1e-06	4.26e-06	2.28e-05	1.28e-05	2e-05	5.44e-06	1.46e-05	4.68e-06	1.48e-05	5.67e-06	2.34e-05	1.21e-05	2.04e-05	1.26e-05	9.62e-06	2.37e-05	0.911545	0.942745	-0.0609781
K02749	4.96e-06	1.32e-05	0	4.26e-06	4.55e-06	4.28e-06	3.34e-06	1.09e-05	0	4.68e-06	0	0	9.34e-06	6.07e-06	1.22e-05	6.3e-06	4.81e-06	0	0.911485	0.942745	0.0338779
K02750	4.96e-06	1.32e-05	0	4.26e-06	4.55e-06	4.28e-06	3.34e-06	1.09e-05	0	4.68e-06	0	0	9.34e-06	6.07e-06	1.22e-05	6.3e-06	4.81e-06	0	0.911485	0.942745	0.0338779
K16137	4.96e-06	0	4.55e-06	0	0	0	0	0	3.65e-06	0	0	0	0	6.07e-06	0	0	0	5.92e-06	0.91144	0.942745	0.0171397
K04835	4.46e-05	6.94e-05	3.19e-05	3.83e-05	2.28e-05	2.57e-05	6.01e-05	4.35e-05	8.03e-05	5.62e-05	8.38e-05	4.54e-05	4.2e-05	1.82e-05	4.89e-05	2.52e-05	5.29e-05	5.33e-05	0.911188	0.942745	-0.0726473
K00791	0.00122992	0.00115044	0.00125608	0.00121813	0.00120611	0.00115062	0.00120435	0.00113142	0.00113836	0.0012409	0.00124733	0.00117421	0.00118654	0.0012447	0.00110793	0.00115342	0.0011011	0.00125503	0.911092	0.942745	-0.668518
K02314	0.0011704	0.00109424	0.00111499	0.00113295	0.00114239	0.00109074	0.00108425	0.00101175	0.00107634	0.00117535	0.00103533	0.00111181	0.0011118	0.00108077	0.00100202	0.00113452	0.00110591	0.00113663	0.910925	0.942745	0.667792
K01683	0	0	0	0	0	0	6.67e-06	0	0	0	0	5.67e-06	0	0	0	0	0	0	0.910477	0.942745	0.0100554
K18337	0	3.31e-06	4.55e-06	0	0	4.28e-06	0	0	3.65e-06	4.68e-06	0	0	0	0	4.07e-06	0	0	5.92e-06	0.910344	0.942745	0.0222274
K17759	0.000535608	0.000578526	0.000609834	0.000566473	0.000605332	0.000598836	0.000580491	0.000630983	0.000539992	0.00059938	0.000552176	0.000578595	0.000565241	0.000576813	0.00068838	0.000560955	0.000601037	0.000503194	0.910334	0.942745	0.421617
K02911	0.000634795	0.000681007	0.000618936	0.00063888	0.000618987	0.000637332	0.000610517	0.000549391	0.000602018	0.000660255	0.000655709	0.00056725	0.000668012	0.000619315	0.000582475	0.000630287	0.000490446	0.000745911	0.909885	0.942745	-0.333041
K03820	0.000143821	0.000198352	0.000145632	0.000149072	0.000154747	8.55e-05	0.000163472	0.000135988	0.000171484	0.000173258	0.000167625	0.000164503	0.000121457	0.000151793	0.000105905	0.000163874	0.000120207	0.000165758	0.909698	0.942745	0.16249
K03841	9.92e-06	9.92e-06	9.1e-06	8.52e-06	9.1e-06	4.28e-06	6.67e-06	1.09e-05	1.46e-05	1.4e-05	4.93e-06	5.67e-06	1.4e-05	1.21e-05	8.15e-06	1.26e-05	9.62e-06	0	0.908708	0.9422	0.0716798
K14267	4.96e-06	3.31e-06	4.55e-06	4.26e-06	4.55e-06	4.28e-06	3.34e-06	5.44e-06	3.65e-06	4.68e-06	0	0	4.67e-06	6.07e-06	4.07e-06	1.26e-05	4.81e-06	0	0.90737	0.941012	0.045595
K03972	1.49e-05	1.98e-05	1.37e-05	1.28e-05	1.37e-05	1.28e-05	3.34e-06	1.09e-05	3.65e-06	9.37e-06	9.86e-06	1.13e-05	1.4e-05	1.21e-05	8.15e-06	1.26e-05	1.44e-05	1.18e-05	0.907265	0.941012	0.0910171
K02752	0	3.31e-06	0	0	0	0	6.67e-06	0	0	0	0	0	0	0	4.07e-06	0	4.81e-06	0	0.906367	0.94037	0.0152889
K02753	0	3.31e-06	0	0	0	0	6.67e-06	0	0	0	0	0	0	0	4.07e-06	0	4.81e-06	0	0.906367	0.94037	0.0152889
K20510	0	3.31e-06	0	4.26e-06	4.55e-06	4.28e-06	3.34e-06	0	3.65e-06	0	4.93e-06	0	0	6.07e-06	0	6.3e-06	4.81e-06	0	0.906133	0.94037	0.0318571
K06311	4.96e-06	1.32e-05	1.37e-05	8.52e-06	9.1e-06	0	1.33e-05	2.18e-05	1.09e-05	9.37e-06	9.86e-06	2.27e-05	9.34e-06	0	8.15e-06	1.26e-05	1.44e-05	5.92e-06	0.905903	0.94037	0.0538702
K09707	0.00014878	9.59e-05	0.000127428	0.00015759	0.00013199	0.000106935	0.000163472	0.000130548	0.00015689	0.000131114	0.000118323	0.000141813	0.000112114	0.000170008	0.00015071	0.00017648	0.000125016	0.000106559	0.903582	0.938277	-0.183969
K10227	4.96e-06	0	0	0	0	0	0	0	0	0	0	0	0	0	0	0	0	5.92e-06	0.902625	0.937482	-0.0109336
K01868	0.000897639	0.000912418	0.000832833	0.000877395	0.000951237	0.000829815	0.000854056	0.000832245	0.000879312	0.000889705	0.000887425	0.000856548	0.000887568	0.000928973	0.000814651	0.000806767	0.00081741	0.000953108	0.9024	0.937447	0.614057
K02338	0.00126463	0.00122978	0.00118326	0.0011798	0.00117881	0.00112923	0.00114764	0.0010879	0.00114201	0.00121281	0.00119802	0.00115719	0.00122858	0.00114755	0.00107127	0.00121645	0.00107706	0.00126686	0.900418	0.935586	-0.650934
K10773	0.00126959	0.00119011	0.00120146	0.00114572	0.00122432	0.00115917	0.00117433	0.00107158	0.00120404	0.00120344	0.00121774	0.00122526	0.00118187	0.0011597	0.00114051	0.00118494	0.00111072	0.00124318	0.898971	0.934281	-0.818782
K03040	0.00113073	0.00113391	0.00107404	0.00105202	0.00111509	0.00100947	0.00105423	0.00101719	0.00108728	0.00114725	0.00113886	0.000981343	0.00111647	0.00112327	0.000993874	0.00100846	0.0010434	0.00108927	0.896329	0.931733	0.665585
K04566	8.43e-05	8.93e-05	9.56e-05	7.67e-05	8.65e-05	5.13e-05	7.01e-05	8.7e-05	9.12e-05	0.000126432	8.87e-05	8.51e-05	7.01e-05	6.68e-05	4.89e-05	6.3e-05	8.17e-05	0.000112479	0.895438	0.931004	-0.14648
K20626	4.96e-06	3.31e-06	4.55e-06	0	0	4.28e-06	3.34e-06	5.44e-06	3.65e-06	4.68e-06	0	0	9.34e-06	0	4.07e-06	0	9.62e-06	0	0.8953	0.931004	0.0351031
K01846	3.97e-05	7.27e-05	2.73e-05	6.39e-05	4.1e-05	2.57e-05	7.67e-05	5.44e-05	6.57e-05	7.02e-05	7.89e-05	4.54e-05	5.61e-05	3.04e-05	4.89e-05	3.78e-05	4.81e-05	4.14e-05	0.89511	0.931004	0.104587
K14088	9.92e-06	1.98e-05	3.19e-05	1.28e-05	9.1e-06	2.14e-05	3e-05	2.18e-05	2.55e-05	1.4e-05	1.48e-05	1.13e-05	2.8e-05	2.43e-05	2.04e-05	1.26e-05	2.88e-05	2.37e-05	0.894604	0.93073	0.0942902
K21019	0	3.31e-06	4.55e-06	0	0	0	3.34e-06	5.44e-06	3.65e-06	0	0	1.13e-05	0	6.07e-06	0	0	4.81e-06	0	0.893924	0.930221	-0.0257475
K19422	0.000138861	0.000171905	0.000150183	0.00015759	0.000145644	0.000124045	0.000123438	0.000130548	0.000131349	0.00014048	0.000152834	0.00015883	0.000140142	0.000133578	9.78e-05	0.000126057	0.000163482	0.000171678	0.893542	0.93002	-0.260896
K03101	0.00122496	0.00124631	0.00120146	0.00118406	0.00118336	0.00111212	0.00119101	0.00120213	0.00120039	0.00121749	0.00122761	0.00116854	0.00122391	0.00114148	0.00120568	0.00116603	0.00120688	0.00120766	0.892748	0.929392	-1.29293
K00651	0.000585201	0.000571914	0.000559773	0.000651657	0.000582576	0.000611668	0.000540458	0.000620104	0.00057283	0.000590015	0.000557106	0.00054456	0.000569912	0.000552526	0.000692453	0.000548349	0.000658736	0.000556473	0.892643	0.929392	0.4761
K20023	4.96e-06	0	0	0	0	0	0	0	0	0	0	0	0	0	4.07e-06	0	0	0	0.891408	0.928392	0.0121869
K06416	0.000218211	0.000274387	0.000241203	0.00026407	0.000291288	0.000333637	0.000206842	0.000174064	0.000197024	0.000248181	0.000266228	0.00024959	0.000233571	0.000261084	0.00016293	0.000296235	0.000163482	0.000290076	0.891049	0.928216	0.180123
K09713	0	3.31e-06	0	0	0	0	3.34e-06	0	3.65e-06	0	0	5.67e-06	0	0	0	0	0	5.92e-06	0.890728	0.928079	-0.0206395
K20117	0.000128943	0.000105788	0.000109224	9.8e-05	0.000127438	0.00011549	7.67e-05	0.000135988	8.76e-05	9.37e-05	9.37e-05	0.00011345	0.000102771	9.11e-05	0.000183296	8.19e-05	0.000173099	7.1e-05	0.889129	0.92661	-0.132194
K11031	4.96e-06	0	9.1e-06	4.26e-06	4.55e-06	4.28e-06	6.67e-06	5.44e-06	3.65e-06	4.68e-06	4.93e-06	5.67e-06	0	0	8.15e-06	1.26e-05	4.81e-06	0	0.888812	0.926477	0.0509618
K11175	0.000738941	0.00080663	0.000814629	0.000783692	0.000732771	0.000834093	0.000747299	0.000930157	0.000762557	0.000847561	0.000778962	0.00072608	0.000850197	0.000716463	0.000904262	0.000743738	0.000865493	0.000674872	0.888475	0.926323	0.418844
K16323	0	3.31e-06	0	0	9.1e-06	0	0	0	0	0	0	0	0	0	0	0	4.81e-06	5.92e-06	0.887784	0.925799	0.0176736
K05787	4.96e-06	9.92e-06	4.55e-06	1.28e-05	1.82e-05	4.28e-06	1e-05	3.26e-05	1.46e-05	1.4e-05	9.86e-06	1.7e-05	9.34e-06	3.04e-05	8.15e-06	1.26e-05	9.62e-06	5.92e-06	0.887645	0.925799	-0.0590985
K12410	0.000689347	0.000753736	0.000855588	0.000732582	0.000732771	0.000688661	0.00076398	0.000848564	0.0007808	0.000697716	0.000764172	0.00077146	0.000752097	0.000795395	0.000761698	0.00076895	0.000711627	0.00079327	0.887565	0.925799	0.593703
K09921	4.96e-06	3.31e-06	4.55e-06	4.26e-06	4.55e-06	4.28e-06	3.34e-06	5.44e-06	3.65e-06	4.68e-06	0	0	4.67e-06	1.21e-05	4.07e-06	6.3e-06	4.81e-06	0	0.886964	0.925536	0.0570856
K02233	0.000282682	0.000284304	0.000354978	0.000379069	0.000291288	0.000333637	0.000320271	0.000359008	0.000335671	0.000341834	0.000325389	0.000300643	0.000345685	0.000285371	0.000378813	0.000327749	0.000341389	0.000313756	0.884172	0.92282	-0.409254
K00547	3.97e-05	6.94e-05	7.74e-05	9.37e-05	8.19e-05	6.84e-05	9.67e-05	8.16e-05	7.3e-05	7.02e-05	7.4e-05	6.81e-05	0.000102771	6.68e-05	0.000134417	6.93e-05	6.25e-05	4.74e-05	0.884028	0.92282	-0.137952
K02584	2.48e-05	4.3e-05	5.46e-05	2.98e-05	3.19e-05	2.14e-05	4.67e-05	1.63e-05	4.38e-05	2.81e-05	3.45e-05	3.4e-05	1.4e-05	6.68e-05	2.04e-05	5.04e-05	1.92e-05	3.55e-05	0.883158	0.922154	0.0910898
K06714	3.47e-05	2.31e-05	0.000118326	8.94e-05	4.55e-06	3.42e-05	4e-05	2.18e-05	2.19e-05	2.81e-05	3.94e-05	3.4e-05	2.8e-05	5.46e-05	3.26e-05	5.04e-05	2.88e-05	0.000112479	0.883069	0.922154	-0.0544071
K03214	1.49e-05	9.92e-06	1.82e-05	1.28e-05	1.37e-05	8.55e-06	1.67e-05	1.63e-05	2.55e-05	9.37e-06	2.47e-05	1.7e-05	4.67e-06	2.43e-05	8.15e-06	2.52e-05	9.62e-06	1.78e-05	0.882269	0.921619	-0.0924523
K00375	0.000362031	0.00038348	0.000395937	0.000459993	0.00043238	0.000423462	0.000447045	0.000462359	0.00044148	0.000486996	0.000389481	0.00038573	0.000453127	0.000321801	0.000492864	0.000365566	0.000500063	0.000378875	0.881143	0.920639	0.324479
K16963	9.92e-06	1.65e-05	1.37e-05	2.98e-05	1.37e-05	1.71e-05	1.33e-05	1.09e-05	1.46e-05	1.87e-05	9.86e-06	1.13e-05	9.34e-06	2.43e-05	1.22e-05	1.89e-05	9.62e-06	2.96e-05	0.880244	0.919897	-0.0963733
K01468	0.000143821	0.00013554	0.000145632	0.00010648	0.000118336	0.000102658	0.000106757	0.000146867	0.000109458	0.000121749	0.000157764	7.37e-05	0.000154157	0.000127506	0.000130344	9.45e-05	0.000110591	0.000130238	0.880144	0.919897	0.216443
K00125	0	3.31e-06	0	0	0	0	6.67e-06	0	0	0	0	5.67e-06	0	0	0	0	0	5.92e-06	0.879224	0.919223	-0.0199326
K00440	0	3.31e-06	0	0	0	0	6.67e-06	0	0	0	0	5.67e-06	0	0	0	0	0	5.92e-06	0.879224	0.919223	-0.0199326
K14103	0	3.31e-06	0	0	0	0	6.67e-06	0	0	0	0	5.67e-06	0	0	0	0	0	5.92e-06	0.879224	0.919223	-0.0199326
K09143	4.96e-06	6.61e-06	9.1e-06	4.26e-06	4.55e-06	8.55e-06	1e-05	1.09e-05	7.3e-06	4.68e-06	4.93e-06	5.67e-06	9.34e-06	6.07e-06	8.15e-06	1.26e-05	4.81e-06	1.18e-05	0.879094	0.919223	-0.110006
K03715	9.92e-06	0	4.55e-06	0	4.55e-06	4.28e-06	6.67e-06	0	3.65e-06	4.68e-06	4.93e-06	0	4.67e-06	6.07e-06	4.07e-06	6.3e-06	4.81e-06	0	0.878476	0.919223	-0.0545375
K01910	8.43e-05	0.000122317	0.000109224	0.000119258	8.19e-05	7.7e-05	0.000126774	0.000103351	0.000131349	0.000112384	0.000128184	0.000119123	9.34e-05	0.000103219	0.000101831	8.19e-05	8.17e-05	0.000147998	0.87623	0.917072	-0.210929
K20533	1.49e-05	1.32e-05	2.28e-05	4.26e-06	1.37e-05	1.71e-05	1.33e-05	2.72e-05	7.3e-06	9.37e-06	2.47e-05	1.7e-05	4.67e-06	1.82e-05	8.15e-06	2.52e-05	9.62e-06	1.18e-05	0.87072	0.9115	0.0886888
K01160	4.96e-06	3.31e-06	4.55e-06	4.26e-06	4.55e-06	4.28e-06	6.67e-06	5.44e-06	3.65e-06	0	4.93e-06	0	4.67e-06	1.21e-05	0	1.26e-05	4.81e-06	0	0.870528	0.911494	0.0540058
K05566	8.43e-05	9.92e-05	0.000104673	0.000119258	0.000104682	0.000124045	0.000110093	0.000119669	0.000116755	9.37e-05	0.000123253	0.000130468	0.0001308	9.11e-05	0.000118124	0.000113452	9.14e-05	0.000100639	0.870505	0.911494	-0.329643
K16959	2.98e-05	1.65e-05	1.37e-05	3.83e-05	4.1e-05	3.85e-05	4e-05	3.26e-05	2.92e-05	2.81e-05	1.97e-05	1.7e-05	3.74e-05	4.25e-05	4.89e-05	4.41e-05	3.85e-05	1.18e-05	0.868638	0.909904	-0.119078
K08081	4.96e-06	9.92e-06	0	0	9.1e-06	1.28e-05	6.67e-06	0	0	4.68e-06	9.86e-06	0	4.67e-06	6.07e-06	4.07e-06	6.3e-06	4.81e-06	0	0.868247	0.909689	0.0497527
K18346	5.46e-05	7.27e-05	0.000109224	9.37e-05	5.92e-05	5.99e-05	7.67e-05	8.7e-05	7.66e-05	8.9e-05	7.4e-05	8.51e-05	6.54e-05	9.71e-05	4.89e-05	6.93e-05	7.21e-05	7.7e-05	0.865925	0.90745	0.214209
K01029	0	3.31e-06	4.55e-06	0	0	4.28e-06	0	0	3.65e-06	0	0	5.67e-06	0	6.07e-06	0	0	0	5.92e-06	0.865541	0.907242	-0.0330399
K00855	0	3.31e-06	0	0	0	4.28e-06	3.34e-06	0	0	4.68e-06	0	0	0	0	0	0	4.81e-06	0	0.86547	0.907242	0.0262201
K12983	0	3.31e-06	9.1e-06	4.26e-06	0	1.28e-05	1e-05	0	1.09e-05	0	4.93e-06	5.67e-06	1.4e-05	0	1.22e-05	0	9.62e-06	0	0.865349	0.907242	0.0453904
K07462	0.000897639	0.000842995	0.000855588	0.000822025	0.000960339	0.000872589	0.000890754	0.000794169	0.000839177	0.000950579	0.000917006	0.000816841	0.000868883	0.000795395	0.000847237	0.000819372	0.000841451	0.000882069	0.864379	0.906607	0.800099
K10796	9.92e-06	1.32e-05	0	0	9.1e-06	0	0	0	0	0	0	0	9.34e-06	6.07e-06	8.15e-06	6.3e-06	0	5.92e-06	0.862394	0.904719	-0.0369671
K06164	0	9.92e-06	4.55e-06	4.26e-06	0	0	0	1.09e-05	3.65e-06	0	0	1.13e-05	4.67e-06	6.07e-06	8.15e-06	6.3e-06	0	0	0.861373	0.903842	-0.0426971
K09805	9.92e-06	1.32e-05	1.82e-05	2.13e-05	4.55e-06	8.55e-06	1.33e-05	1.63e-05	1.46e-05	9.37e-06	0	1.13e-05	2.34e-05	2.43e-05	1.63e-05	2.52e-05	9.62e-06	5.92e-06	0.860796	0.903429	-0.088523
K05822	3.97e-05	2.31e-05	5.01e-05	3.83e-05	5.46e-05	2.57e-05	4.34e-05	3.81e-05	4.38e-05	5.15e-05	3.45e-05	1.13e-05	4.2e-05	3.64e-05	5.3e-05	4.41e-05	5.77e-05	3.55e-05	0.860394	0.903201	-0.156544
K13727	0	3.31e-06	0	0	4.55e-06	0	0	0	0	0	9.86e-06	0	0	0	0	0	0	0	0.860336	0.903201	-0.0176687
K07566	0.00102162	0.00100498	0.000996669	0.00103073	0.000983096	0.00104796	0.000954141	0.000951915	0.000966878	0.00104892	0.000986028	0.000981343	0.000976325	0.000965403	0.000977581	0.00100846	0.00107706	0.000964948	0.859894	0.903064	-1.28311
K22024	3.47e-05	4.63e-05	7.74e-05	3.41e-05	4.55e-05	5.13e-05	5.67e-05	5.98e-05	6.93e-05	6.56e-05	6.41e-05	7.94e-05	2.8e-05	6.07e-05	4.48e-05	3.15e-05	4.81e-05	6.51e-05	0.859151	0.902477	-0.16002
K05844	6.94e-05	9.26e-05	0.000100122	8.94e-05	5.92e-05	8.55e-05	0.000103421	0.00010879	0.000102161	9.83e-05	9.37e-05	0.000119123	7.47e-05	0.000103219	6.92e-05	8.82e-05	8.17e-05	9.47e-05	0.857979	0.901439	-0.275094
K11754	0.000813331	0.000780183	0.000805527	0.000787952	0.000787387	0.000829815	0.000810686	0.000794169	0.000751611	0.00082883	0.0007198	0.000828186	0.000854869	0.000722535	0.000961288	0.000718527	0.00084626	0.000728151	0.857698	0.901338	-0.622753
K03974	0	3.31e-06	0	0	0	0	6.67e-06	5.44e-06	3.65e-06	4.68e-06	4.93e-06	5.67e-06	0	0	0	0	0	5.92e-06	0.857678	0.901338	-0.0391654
K05823	9.92e-06	3.31e-06	0	8.52e-06	4.55e-06	8.55e-06	0	0	0	0	4.93e-06	0	0	6.07e-06	4.07e-06	6.3e-06	4.81e-06	5.92e-06	0.85751	0.901338	0.0505538
K17466	4.96e-06	9.92e-06	0	1.28e-05	1.37e-05	4.28e-06	0	5.44e-06	7.3e-06	1.4e-05	4.93e-06	5.67e-06	4.67e-06	6.07e-06	4.07e-06	0	9.62e-06	5.92e-06	0.857237	0.901338	0.0684884
K08990	0	0	4.55e-06	0	0	0	0	0	0	0	0	0	0	0	0	0	0	5.92e-06	0.856722	0.901086	-0.0160472
K11737	0	0	0	0	4.55e-06	0	0	0	0	0	0	0	0	0	0	0	0	5.92e-06	0.856722	0.901086	-0.0160472
K13529	0	0	4.55e-06	0	0	0	0	0	0	0	0	0	0	0	0	0	0	5.92e-06	0.856722	0.901086	-0.0160472
K16097	0	0	0	0	4.55e-06	0	0	0	0	0	0	0	0	0	0	0	0	5.92e-06	0.856722	0.901086	-0.0160472
K07770	5.46e-05	4.3e-05	5.46e-05	5.54e-05	4.1e-05	5.56e-05	3e-05	4.35e-05	4.38e-05	5.62e-05	2.47e-05	7.37e-05	5.14e-05	5.46e-05	3.26e-05	5.04e-05	2.88e-05	5.92e-05	0.85653	0.901086	-0.177839
K20118	0.000128943	0.000105788	0.000109224	9.8e-05	0.000127438	0.00011549	7.67e-05	0.000130548	8.76e-05	9.37e-05	9.37e-05	0.00011345	0.000102771	9.11e-05	0.000183296	8.19e-05	0.000173099	7.1e-05	0.856269	0.901086	-0.17262
K03046	0.000823249	0.000753736	0.000632589	0.00068999	0.000842004	0.000731435	0.000710602	0.000718016	0.000737016	0.000749225	0.0007198	0.00070339	0.000756769	0.000758965	0.000672087	0.000743738	0.000706819	0.00078735	0.856172	0.901086	0.691707
K01209	0.000357072	0.000380174	0.000245754	0.000396105	0.000345904	0.000376411	0.000427028	0.000424282	0.000434183	0.000276277	0.0003599	0.00043111	0.000345685	0.000443235	0.000439911	0.000409686	0.000331772	0.000301916	0.855172	0.900811	0.304383
K05245	0	0	4.55e-06	8.52e-06	0	0	0	0	0	0	0	0	0	0	4.07e-06	0	0	1.18e-05	0.85503	0.900811	-0.0222235
K03312	0.000114065	0.000181822	0.000163836	0.000144813	0.000168401	0.000175373	0.000166808	0.000141427	0.000164187	0.000182624	0.000162695	0.000119123	0.000205542	0.000109291	0.000179223	0.000100846	0.000177907	0.000159838	0.854602	0.900598	0.25779
K03483	9.92e-06	6.61e-06	0	1.28e-05	4.55e-06	8.55e-06	0	2.18e-05	3.65e-06	0	9.86e-06	1.13e-05	0	1.21e-05	1.22e-05	1.26e-05	4.81e-06	0	0.854145	0.90031	0.0568086
K02203	0.000163658	0.000178517	0.00013653	0.000229997	0.000245774	0.000201038	0.000190161	0.000255657	0.000222564	0.000224768	0.000202136	0.000255263	0.000196199	0.000157865	0.000219956	0.000157572	0.000192332	0.000189438	0.853375	0.899693	0.280708
K11051	0.000198373	0.000211575	0.00018204	0.000200182	0.000191158	0.000166819	0.000200169	0.000179504	0.000211619	0.000238815	0.000221856	0.000283625	0.000135471	0.00017608	9.78e-05	0.000157572	0.000177907	0.000219037	0.852813	0.899293	0.229841
K02570	4.96e-06	3.31e-06	4.55e-06	8.52e-06	9.1e-06	4.28e-06	6.67e-06	1.09e-05	7.3e-06	1.4e-05	0	0	9.34e-06	1.21e-05	0	1.89e-05	9.62e-06	0	0.852724	0.899293	-0.0627601
K19055	0.000292601	0.000376868	0.000373182	0.000366291	0.000295839	0.000333637	0.00034696	0.000342689	0.000368508	0.000341834	0.000315529	0.000351695	0.000322327	0.000382518	0.000285128	0.000365566	0.000307731	0.000396635	0.852083	0.898911	0.500037
K07569	0	6.61e-06	9.1e-06	0	4.55e-06	8.55e-06	1e-05	1.09e-05	7.3e-06	9.37e-06	4.93e-06	1.13e-05	4.67e-06	0	0	0	4.81e-06	1.78e-05	0.852075	0.898911	0.0595919
K03404	1.98e-05	1.65e-05	9.1e-06	2.98e-05	2.73e-05	2.99e-05	1.67e-05	2.18e-05	1.82e-05	1.4e-05	2.47e-05	3.4e-05	1.87e-05	2.43e-05	1.22e-05	3.15e-05	2.4e-05	1.18e-05	0.851323	0.898497	-0.142551
K10009	0.000119024	7.6e-05	7.74e-05	7.24e-05	9.56e-05	0.000102658	7.34e-05	8.7e-05	9.12e-05	8.9e-05	7.89e-05	0.000102105	8.88e-05	6.68e-05	7.74e-05	9.45e-05	0.000134632	7.7e-05	0.851182	0.898497	-0.251534
K13039	4.96e-06	9.92e-06	9.1e-06	4.26e-06	4.55e-06	4.28e-06	1e-05	1.63e-05	1.09e-05	9.37e-06	9.86e-06	1.13e-05	9.34e-06	6.07e-06	8.15e-06	6.3e-06	4.81e-06	1.18e-05	0.850724	0.898251	-0.126402
K03553	0.00110097	0.00104465	0.00110134	0.00102647	0.00113329	0.00104368	0.00105756	0.000968233	0.00109093	0.00107233	0.00119802	0.000992688	0.0010464	0.00109898	0.00100202	0.00101476	0.00102417	0.00107151	0.850589	0.898251	0.942929
K14101	0	3.31e-06	0	0	0	0	6.67e-06	0	3.65e-06	0	0	5.67e-06	0	0	0	0	0	5.92e-06	0.850193	0.898079	0.0284046
K02043	0	0	0	0	0	0	0	0	3.65e-06	0	0	0	0	0	0	0	4.81e-06	0	0.85007	0.898079	-0.0167845
K12660	0	0	0	0	0	0	0	0	3.65e-06	0	0	0	0	0	0	0	4.81e-06	0	0.85007	0.898079	-0.0167845
K17947	9.92e-06	3.31e-06	9.1e-06	4.26e-06	4.55e-06	8.55e-06	3.34e-06	1.09e-05	7.3e-06	4.68e-06	4.93e-06	1.13e-05	1.4e-05	0	1.22e-05	0	4.81e-06	5.92e-06	0.849866	0.898079	0.0810578
K06903	9.92e-05	0.000109093	0.000109224	7.67e-05	0.000104682	0.000111212	0.000103421	0.000163185	9.12e-05	9.37e-05	7.89e-05	0.000153158	0.000121457	0.000151793	6.92e-05	0.000126057	6.73e-05	0.000130238	0.849066	0.897662	-0.191386
K05884	4.96e-06	9.92e-06	1.37e-05	0	0	0	1e-05	0	7.3e-06	4.68e-06	0	5.67e-06	9.34e-06	0	8.15e-06	0	4.81e-06	1.78e-05	0.848878	0.897658	-0.049294
K00752	4.96e-06	9.92e-06	4.55e-06	8.52e-06	9.1e-06	4.28e-06	1.67e-05	5.44e-06	1.46e-05	0	0	5.67e-06	1.4e-05	1.82e-05	1.22e-05	1.89e-05	1.44e-05	0	0.848498	0.89745	-0.0715961
K06159	0	0	0	4.26e-06	4.55e-06	0	3.34e-06	0	7.3e-06	4.68e-06	0	0	0	6.07e-06	0	6.3e-06	4.81e-06	0	0.844399	0.893307	-0.0425253
K07219	3.97e-05	4.96e-05	8.19e-05	5.96e-05	5.01e-05	3.42e-05	4.34e-05	8.16e-05	5.47e-05	7.02e-05	7.4e-05	5.67e-05	5.14e-05	5.46e-05	4.89e-05	6.3e-05	3.85e-05	2.37e-05	0.84426	0.893307	0.175742
K12555	8.93e-05	0.000105788	8.65e-05	0.000127776	0.00013199	0.000141154	7.67e-05	3.81e-05	8.03e-05	0.000103018	0.000118323	8.51e-05	0.000102771	9.11e-05	6.52e-05	8.82e-05	7.69e-05	0.000124318	0.844002	0.893273	0.190513
K07664	0	0	0	0	4.55e-06	0	0	0	0	0	0	0	0	6.07e-06	0	0	0	0	0.843717	0.893165	-0.0174878
K05964	2.48e-05	5.29e-05	4.55e-05	3.83e-05	3.19e-05	2.99e-05	4e-05	3.81e-05	4.01e-05	3.75e-05	4.44e-05	3.97e-05	3.27e-05	4.86e-05	2.04e-05	4.41e-05	2.88e-05	5.33e-05	0.843215	0.892826	-0.2176
K09472	0	0	0	0	0	0	0	5.44e-06	0	0	0	0	0	0	4.07e-06	0	0	0	0.842733	0.892509	0.0175965
K01630	0	2.31e-05	1.82e-05	1.28e-05	0	1.28e-05	1.67e-05	1.09e-05	1.09e-05	1.4e-05	4.93e-06	5.67e-06	4.67e-06	2.43e-05	1.22e-05	3.15e-05	9.62e-06	5.92e-06	0.842331	0.892277	-0.0750356
K02916	0.00102658	0.00100168	0.00100577	0.00101369	0.000960339	0.00108646	0.000940797	0.000886641	0.000948635	0.000973993	0.00108463	0.000952981	0.00095764	0.000941116	0.000936848	0.00094543	0.000976084	0.00105375	0.840753	0.890798	0.955991
K06207	0.000897639	0.000895888	0.000855588	0.000894432	0.000960339	0.000902531	0.000847384	0.000805048	0.00083188	0.00089907	0.000907146	0.000913273	0.000882897	0.000850041	0.000859456	0.000844584	0.000884726	0.000882069	0.83895	0.88908	-1.29296
K15973	4.96e-06	3.31e-06	0	4.26e-06	0	0	1e-05	0	7.3e-06	0	0	5.67e-06	4.67e-06	6.07e-06	4.07e-06	6.3e-06	0	5.92e-06	0.838875	0.88908	-0.0580069
K11903	4.96e-06	3.31e-06	9.1e-06	0	4.55e-06	4.28e-06	3.34e-06	0	3.65e-06	4.68e-06	0	0	4.67e-06	6.07e-06	4.07e-06	0	4.81e-06	1.18e-05	0.837937	0.888391	-0.0641442
K03540	4.96e-06	9.92e-06	9.1e-06	4.26e-06	4.55e-06	4.28e-06	1e-05	5.44e-06	3.65e-06	4.68e-06	4.93e-06	1.13e-05	4.67e-06	6.07e-06	4.07e-06	6.3e-06	4.81e-06	1.18e-05	0.837443	0.888059	-0.12597
K09972	0	0	0	0	0	0	0	0	3.65e-06	0	4.93e-06	0	0	0	0	0	0	0	0.83734	0.888059	-0.0181925
K12136	0	0	0	0	0	0	0	0	3.65e-06	0	4.93e-06	0	0	0	0	0	0	0	0.83734	0.888059	-0.0181925
K03627	9.92e-06	1.32e-05	9.1e-06	4.26e-06	4.55e-06	8.55e-06	1.33e-05	1.09e-05	1.46e-05	9.37e-06	9.86e-06	1.7e-05	4.67e-06	1.82e-05	4.07e-06	1.26e-05	4.81e-06	1.18e-05	0.836919	0.888059	-0.123292
K07175	7.93e-05	7.27e-05	0.000113775	8.94e-05	0.000118336	0.000102658	9.01e-05	9.25e-05	0.000109458	8.9e-05	7.4e-05	9.08e-05	0.000126128	8.5e-05	9.78e-05	0.000113452	7.69e-05	0.000100639	0.835924	0.887218	0.327832
K09860	1.49e-05	0	1.37e-05	4.26e-06	4.55e-06	4.28e-06	3.34e-06	5.44e-06	7.3e-06	9.37e-06	4.93e-06	5.67e-06	9.34e-06	6.07e-06	4.07e-06	1.26e-05	9.62e-06	0	0.835561	0.887024	-0.0849714
K08224	0	3.31e-06	0	0	0	0	3.34e-06	1.09e-05	3.65e-06	4.68e-06	4.93e-06	5.67e-06	4.67e-06	0	4.07e-06	0	0	0	0.834603	0.8862	-0.0450175
K01758	4.96e-06	0	4.55e-06	4.26e-06	0	0	6.67e-06	5.44e-06	3.65e-06	0	4.93e-06	5.67e-06	0	6.07e-06	4.07e-06	6.3e-06	0	0	0.834555	0.8862	0.0638175
K14083	3.47e-05	1.65e-05	0.000232101	0.00021296	0	0	7.01e-05	0	0	6.09e-05	8.87e-05	1.7e-05	0	6.68e-05	1.22e-05	3.15e-05	9.62e-06	0.000207197	0.83444	0.8862	0.0411699
K14058	9.92e-06	1.32e-05	2.73e-05	8.52e-06	4.55e-06	8.55e-06	1.33e-05	1.63e-05	1.46e-05	2.34e-05	9.86e-06	2.27e-05	4.67e-06	1.21e-05	1.22e-05	6.3e-06	1.92e-05	1.18e-05	0.834072	0.8862	-0.112494
K00034	9.92e-06	1.32e-05	1.37e-05	1.7e-05	2.28e-05	2.14e-05	3e-05	5.44e-06	2.19e-05	3.28e-05	9.86e-06	2.27e-05	0	1.21e-05	2.85e-05	1.89e-05	3.37e-05	5.92e-06	0.83371	0.88602	-0.0995349
K08083	0	3.31e-06	0	0	0	4.28e-06	0	0	0	0	0	0	0	0	0	0	0	5.92e-06	0.83309	0.885554	0.0231341
K06932	9.92e-06	9.92e-06	4.55e-06	4.26e-06	9.1e-06	8.55e-06	1.33e-05	1.63e-05	3.65e-06	4.68e-06	9.86e-06	1.13e-05	4.67e-06	1.21e-05	4.07e-06	1.26e-05	4.81e-06	1.18e-05	0.832344	0.884953	0.122552
K14591	0	0	9.1e-06	1.28e-05	0	8.55e-06	6.67e-06	5.44e-06	7.3e-06	4.68e-06	4.93e-06	1.13e-05	4.67e-06	6.07e-06	0	6.3e-06	9.62e-06	5.92e-06	0.8323	0.884953	-0.0821999
K09979	4.96e-06	3.31e-06	9.1e-06	8.52e-06	1.37e-05	4.28e-06	3.34e-06	1.09e-05	7.3e-06	4.68e-06	4.93e-06	0	1.4e-05	1.21e-05	8.15e-06	1.26e-05	4.81e-06	0	0.831238	0.884161	0.0894819
K19354	0	0	9.1e-06	0	9.1e-06	4.28e-06	0	5.44e-06	3.65e-06	4.68e-06	0	1.13e-05	1.4e-05	0	0	0	0	5.92e-06	0.830865	0.883956	-0.0457716
K13607	0	0	4.55e-06	4.26e-06	4.55e-06	0	3.34e-06	1.09e-05	3.65e-06	4.68e-06	9.86e-06	0	4.67e-06	0	4.07e-06	0	4.81e-06	0	0.830418	0.883674	0.0554568
K02526	9.92e-06	2.31e-05	9.1e-06	2.13e-05	9.1e-06	1.28e-05	1.67e-05	2.18e-05	1.46e-05	2.34e-05	2.47e-05	1.13e-05	1.4e-05	1.21e-05	1.22e-05	1.26e-05	4.81e-06	1.78e-05	0.829926	0.883342	0.146283
K01046	8.43e-05	0.000102482	4.55e-05	0.000136294	0.000136541	0.000171096	0.000106757	0.000103351	0.000109458	0.000131114	8.38e-05	0.000119123	9.81e-05	6.68e-05	0.000101831	8.82e-05	0.000129824	0.000147998	0.829551	0.883134	0.202014
K15555	9.42e-05	6.28e-05	0.000104673	0.000110739	0.00013199	9.41e-05	7.67e-05	0.00010879	6.93e-05	0.000131114	5.42e-05	8.51e-05	7.47e-05	0.000103219	0.000122198	0.000107149	9.62e-05	0.000100639	0.829488	0.883134	-0.243064
K00183	0	6.61e-06	0	0	0	0	0	0	0	0	0	0	0	0	0	0	4.81e-06	0	0.82851	0.88241	0.0191666
K15664	4.96e-06	9.92e-06	1.37e-05	0	1.37e-05	2.14e-05	6.67e-06	0	0	9.37e-06	1.97e-05	1.13e-05	9.34e-06	0	8.15e-06	0	0	5.92e-06	0.828492	0.88241	0.0616883
K05541	4.96e-06	0	1.82e-05	0	0	4.28e-06	3.34e-06	5.44e-06	3.65e-06	4.68e-06	4.93e-06	5.67e-06	0	6.07e-06	0	6.3e-06	4.81e-06	1.18e-05	0.828001	0.882252	-0.0582437
K05988	1.98e-05	3.31e-06	9.1e-06	8.52e-06	1.82e-05	1.28e-05	1e-05	1.09e-05	1.46e-05	1.4e-05	4.93e-06	2.84e-05	4.67e-06	1.21e-05	4.07e-06	1.26e-05	1.44e-05	5.92e-06	0.827776	0.882204	0.10339
K03481	9.92e-06	9.92e-06	4.55e-06	0	0	4.28e-06	6.67e-06	1.09e-05	7.3e-06	0	4.93e-06	5.67e-06	9.34e-06	0	1.63e-05	0	4.81e-06	1.78e-05	0.825413	0.879877	-0.0663065
K18827	0	3.31e-06	4.55e-06	0	4.55e-06	4.28e-06	3.34e-06	0	0	4.68e-06	0	0	0	6.07e-06	0	1.26e-05	0	0	0.825116	0.879752	-0.0410746
K21578	0	9.92e-06	4.55e-06	4.26e-06	4.55e-06	1.71e-05	6.67e-06	1.09e-05	7.3e-06	4.68e-06	4.93e-06	1.13e-05	9.34e-06	6.07e-06	8.15e-06	0	4.81e-06	1.18e-05	0.825059	0.879752	0.0952969
K01761	3.97e-05	6.94e-05	5.92e-05	3.41e-05	3.19e-05	3.85e-05	5.34e-05	5.98e-05	4.74e-05	4.68e-05	4.93e-05	7.94e-05	3.74e-05	4.86e-05	3.67e-05	4.41e-05	2.88e-05	7.7e-05	0.824711	0.879704	-0.189393
K06897	0.000173577	0.000264469	0.000222999	0.000229997	0.000172952	0.000230979	0.000250212	0.000174064	0.000226213	0.000224768	0.000207066	0.000221228	0.000233571	0.000224654	0.000224029	0.000258417	0.000201948	0.000177598	0.82436	0.879521	-0.446746
K22468	9.92e-06	9.92e-06	1.37e-05	1.28e-05	1.37e-05	8.55e-06	6.67e-06	1.09e-05	7.3e-06	1.87e-05	4.93e-06	5.67e-06	9.34e-06	6.07e-06	1.22e-05	1.26e-05	1.92e-05	0	0.822866	0.878118	0.123731
K00254	3.97e-05	3.97e-05	5.01e-05	3.83e-05	3.64e-05	2.57e-05	3.34e-05	3.26e-05	3.65e-05	3.28e-05	2.47e-05	2.27e-05	3.27e-05	6.07e-05	2.85e-05	5.67e-05	3.37e-05	2.96e-05	0.822572	0.877996	0.205696
K18855	4.96e-06	9.92e-06	9.1e-06	4.26e-06	0	0	1e-05	0	7.3e-06	4.68e-06	0	1.13e-05	4.67e-06	6.07e-06	0	6.3e-06	4.81e-06	1.18e-05	0.821742	0.877301	-0.0760409
K19046	2.48e-05	2.98e-05	2.28e-05	2.98e-05	3.64e-05	3.85e-05	2e-05	3.81e-05	1.46e-05	1.87e-05	2.47e-05	5.67e-05	9.34e-06	3.04e-05	2.85e-05	3.15e-05	1.92e-05	4.74e-05	0.821421	0.87715	-0.146874
K15888	9.92e-06	1.65e-05	4.55e-06	4.26e-06	4.55e-06	8.55e-06	1e-05	1.09e-05	1.82e-05	4.68e-06	9.86e-06	1.7e-05	4.67e-06	1.21e-05	4.07e-06	1.26e-05	9.62e-06	1.78e-05	0.821299	0.87715	-0.118841
K02783	9.92e-06	3.64e-05	2.28e-05	4.69e-05	1.37e-05	2.14e-05	1.33e-05	1.63e-05	1.09e-05	4.68e-06	3.45e-05	4.54e-05	1.4e-05	2.43e-05	1.63e-05	1.26e-05	9.62e-06	1.78e-05	0.821129	0.87715	0.0982516
K19591	0	0	4.55e-06	0	0	0	0	0	7.3e-06	4.68e-06	0	0	0	0	0	0	4.81e-06	0	0.820851	0.877116	0.0298504
K01727	0	9.92e-06	0	0	0	0	3.34e-06	5.44e-06	3.65e-06	9.37e-06	4.93e-06	0	4.67e-06	0	0	0	0	0	0.820517	0.87695	0.0405091
K03713	0	0	0	0	0	0	3.34e-06	0	0	0	0	0	4.67e-06	0	0	0	0	0	0.819748	0.876319	-0.0201309
K01447	0.000133902	0.000109093	0.000113775	0.000102221	9.56e-05	9.84e-05	0.000106757	0.00011423	8.76e-05	9.37e-05	0.000108463	0.00011345	8.88e-05	0.000121434	4.48e-05	0.000126057	0.000120207	0.000124318	0.81954	0.876288	0.313295
K04802	4.96e-06	1.32e-05	1.37e-05	4.26e-06	4.55e-06	8.55e-06	1e-05	1.63e-05	1.09e-05	4.68e-06	9.86e-06	1.13e-05	4.67e-06	1.21e-05	4.07e-06	1.26e-05	4.81e-06	1.78e-05	0.819345	0.876271	0.124757
K14742	0.000694307	0.000651255	0.000700854	0.000660176	0.000700911	0.000667274	0.000657223	0.000625544	0.000631207	0.000721129	0.000680359	0.000606958	0.00072874	0.000649674	0.000659867	0.000693315	0.000668353	0.000615672	0.819339	0.876271	-1.14223
K02904	0.00120512	0.00116697	0.00116961	0.00113721	0.00119246	0.00118912	0.00108759	0.0011423	0.00110188	0.00118471	0.00130649	0.00112316	0.00121457	0.00112327	0.000981654	0.00124166	0.00107706	0.00121359	0.818449	0.875696	-0.957135
K01897	0.001463	0.00137854	0.00140171	0.00117554	0.00129259	0.00137732	0.00125439	0.00120757	0.00135728	0.00139543	0.00137551	0.00119123	0.00131267	0.00140864	0.00110385	0.00136142	0.00123573	0.00142078	0.818393	0.875696	0.783686
K02454	1.98e-05	2.31e-05	4.1e-05	2.56e-05	2.73e-05	1.71e-05	2.34e-05	1.63e-05	2.55e-05	2.81e-05	2.96e-05	2.27e-05	3.27e-05	2.43e-05	1.22e-05	2.52e-05	3.37e-05	1.78e-05	0.815225	0.872628	-0.217458
K03304	0	3.31e-06	0	0	0	0	0	0	0	0	0	0	4.67e-06	0	0	0	0	0	0.815212	0.872628	-0.0206292
K01892	0.00104642	0.00105788	0.000996669	0.000919987	0.00099675	0.000996634	0.000957477	0.000951915	0.000930392	0.00103018	0.00102547	0.000987016	0.000971654	0.0010079	0.000912409	0.000970641	0.000947234	0.00104783	0.815208	0.872628	-1.35057
K05575	9.92e-06	3.31e-06	4.55e-06	0	0	0	1.33e-05	0	0	0	4.93e-06	0	9.34e-06	6.07e-06	0	6.3e-06	0	0	0.814752	0.872628	0.0459364
K09962	0	3.31e-06	0	0	0	0	0	0	0	4.68e-06	0	0	0	0	0	0	0	0	0.814141	0.87223	-0.0207468
K07495	4.96e-06	3.31e-06	4.55e-06	4.26e-06	4.55e-06	4.28e-06	3.34e-06	0	3.65e-06	4.68e-06	4.93e-06	0	4.67e-06	6.07e-06	4.07e-06	6.3e-06	0	0	0.81407	0.87223	0.103896
K18924	1.49e-05	6.61e-06	9.1e-06	8.52e-06	4.55e-06	4.28e-06	3.34e-06	5.44e-06	3.65e-06	9.37e-06	4.93e-06	0	9.34e-06	6.07e-06	8.15e-06	1.26e-05	1.44e-05	0	0.813948	0.87223	-0.0998872
K01271	5.95e-05	6.28e-05	9.1e-05	5.54e-05	7.74e-05	4.71e-05	8.34e-05	8.16e-05	6.93e-05	7.49e-05	7.4e-05	0.000102105	4.2e-05	8.5e-05	6.11e-05	5.67e-05	7.69e-05	7.1e-05	0.813837	0.87223	-0.279984
K07032	0	9.92e-06	4.55e-06	0	0	4.28e-06	6.67e-06	0	3.65e-06	4.68e-06	0	0	4.67e-06	6.07e-06	4.07e-06	6.3e-06	0	0	0.812394	0.871121	0.0606417
K03978	0.00118528	0.00115044	0.00110589	0.00102221	0.0011515	0.00115062	0.000977494	0.000979112	0.00113106	0.00117066	0.00114872	0.00114585	0.00114917	0.00103219	0.00101831	0.00108409	0.00109148	0.00108335	0.81225	0.871121	-1.02277
K03075	0.000833168	0.000800019	0.000810078	0.000787952	0.000787387	0.00083837	0.000790669	0.000837685	0.000809988	0.000786686	0.000778962	0.000760115	0.000896911	0.000722535	0.000875749	0.00085719	0.000851068	0.00081103	0.81213	0.871121	-1.18442
K06972	0.000213251	0.000234716	0.000177489	0.000195923	0.000250325	0.000230979	0.00024354	0.000250218	0.00023351	0.000215402	0.000182415	0.000232573	0.000242913	0.000163936	0.0003503	0.000163874	0.000264456	0.000165758	0.811657	0.870904	0.303391
K15539	1.49e-05	3.31e-06	9.1e-06	0	0	4.28e-06	1.33e-05	5.44e-06	1.09e-05	0	0	5.67e-06	9.34e-06	1.21e-05	4.07e-06	1.26e-05	0	1.18e-05	0.810978	0.870365	0.0761141
K10011	0	6.61e-06	9.1e-06	8.52e-06	9.1e-06	0	2.34e-05	0	2.19e-05	9.37e-06	9.86e-06	2.27e-05	9.34e-06	0	8.15e-06	6.3e-06	4.81e-06	0	0.810955	0.870365	0.0678121
K02664	1.49e-05	3.31e-06	9.1e-06	4.26e-06	4.55e-06	4.28e-06	6.67e-06	5.44e-06	7.3e-06	9.37e-06	0	0	9.34e-06	6.07e-06	8.15e-06	6.3e-06	4.81e-06	1.18e-05	0.810898	0.870365	0.107339
K01639	0.000128943	0.000188434	0.000222999	0.000174627	0.000136541	0.000149709	0.000166808	0.000206701	0.000138647	0.000191989	0.000182415	0.000170175	0.000144814	0.000188223	0.000146637	0.000207995	0.000201948	0.000112479	0.810704	0.870365	-0.339661
K10725	9.92e-06	2.64e-05	9.1e-06	1.28e-05	1.37e-05	1.28e-05	2.34e-05	2.72e-05	2.55e-05	1.4e-05	1.48e-05	2.84e-05	9.34e-06	2.43e-05	8.15e-06	3.15e-05	9.62e-06	2.96e-05	0.810653	0.870365	-0.13736
K01785	0.000833168	0.000819854	0.000878343	0.000804988	0.000873863	0.000752822	0.000824031	0.000919278	0.000879312	0.000772638	0.000852914	0.000833858	0.000817497	0.000837897	0.000924629	0.000850887	0.000980892	0.00077551	0.81024	0.870365	-0.925693
K01215	4.46e-05	4.63e-05	7.28e-05	5.11e-05	5.92e-05	4.28e-05	4.67e-05	4.35e-05	4.74e-05	5.15e-05	2.47e-05	2.27e-05	7.01e-05	2.43e-05	7.74e-05	1.89e-05	0.000105782	3.55e-05	0.809786	0.870231	0.140369
K01599	0.000163658	0.000340504	0.00022755	0.000276848	0.000109233	0.000192483	0.00026022	0.000212141	0.00020797	0.000220085	0.000266228	0.00020421	0.000177514	0.000267156	0.000215882	0.00026472	0.000125016	0.000189438	0.809547	0.870165	0.242853
K01641	4.96e-06	1.32e-05	9.1e-06	1.28e-05	1.82e-05	8.55e-06	1.33e-05	1.09e-05	7.3e-06	4.68e-06	9.86e-06	1.13e-05	4.67e-06	1.82e-05	8.15e-06	1.89e-05	4.81e-06	2.37e-05	0.809432	0.870165	-0.127227
K03630	0.00113569	0.00119011	0.00122877	0.00125646	0.00129259	0.00123189	0.00121436	0.0010879	0.00118944	0.00118471	0.0012424	0.00124228	0.00122391	0.00123863	0.00116088	0.00115973	0.00116841	0.00126094	0.808246	0.869149	-1.50517
K02459	0	3.31e-06	9.1e-06	0	0	0	0	5.44e-06	0	4.68e-06	0	5.67e-06	0	0	0	0	4.81e-06	5.92e-06	0.807311	0.868334	-0.0461422
K04093	4.96e-06	1.65e-05	1.37e-05	4.26e-06	4.55e-06	1.28e-05	1.33e-05	1.09e-05	7.3e-06	1.4e-05	4.93e-06	1.13e-05	9.34e-06	6.07e-06	4.07e-06	6.3e-06	9.62e-06	1.78e-05	0.806236	0.867368	0.137361
K00634	0.000114065	9.59e-05	0.000100122	0.000123517	0.000118336	0.000106935	0.000136782	0.000146867	0.000138647	8.9e-05	0.000123253	0.000130468	0.000107442	0.000115363	0.000146637	0.000151269	0.000125016	0.000112479	0.805388	0.866647	-0.431494
K02062	0	3.31e-06	4.55e-06	4.26e-06	0	4.28e-06	3.34e-06	0	7.3e-06	0	9.86e-06	5.67e-06	0	0	4.07e-06	0	4.81e-06	5.92e-06	0.80533	0.866647	-0.0681636
K11893	4.96e-06	6.61e-06	9.1e-06	4.26e-06	4.55e-06	8.55e-06	0	0	0	4.68e-06	0	0	0	6.07e-06	8.15e-06	1.26e-05	4.81e-06	5.92e-06	0.804018	0.865553	-0.0757277
K00121	0	9.92e-06	0	0	0	0	3.34e-06	0	3.65e-06	0	4.93e-06	1.7e-05	0	0	0	0	0	0	0.803771	0.865477	-0.0307396
K02959	0.00118528	0.00122317	0.0011514	0.00120961	0.00117881	0.00114207	0.00114097	0.00102807	0.00118214	0.00119408	0.00128184	0.00110047	0.0011445	0.00114755	0.00106719	0.00121015	0.0011588	0.00120174	0.803674	0.865477	-1.28561
K00428	1.49e-05	4.96e-05	3.64e-05	2.13e-05	2.73e-05	2.14e-05	3e-05	5.44e-05	4.38e-05	3.28e-05	1.48e-05	3.97e-05	2.8e-05	4.86e-05	2.44e-05	5.04e-05	3.85e-05	3.55e-05	0.802115	0.864074	-0.181815
K09736	1.49e-05	6.61e-06	4.55e-06	4.26e-06	4.55e-06	8.55e-06	6.67e-06	1.09e-05	1.09e-05	4.68e-06	9.86e-06	1.13e-05	4.67e-06	1.21e-05	4.07e-06	1.26e-05	4.81e-06	1.18e-05	0.802111	0.864074	-0.149324
K07130	7.44e-05	0.000138846	0.000104673	0.000140554	9.56e-05	6.84e-05	0.000133446	0.000103351	0.000113106	8.43e-05	0.000138044	0.00013614	9.34e-05	0.000115363	8.15e-05	0.000107149	9.62e-05	0.000147998	0.801452	0.86374	-0.289579
K01730	1.49e-05	9.92e-06	0	8.52e-06	1.37e-05	8.55e-06	1e-05	1.63e-05	1.46e-05	4.68e-06	1.48e-05	5.67e-06	4.67e-06	1.82e-05	2.04e-05	1.89e-05	9.62e-06	5.92e-06	0.801096	0.863546	-0.127816
K02520	0.00116048	0.00114383	0.00117416	0.00119684	0.00116515	0.00114207	0.00117433	0.00114774	0.00116025	0.00120344	0.00119309	0.00112883	0.00118654	0.00117184	0.00106719	0.00114712	0.00119727	0.00120766	0.798772	0.861231	-2.29861
K09940	0	9.92e-06	4.55e-06	4.26e-06	4.55e-06	0	6.67e-06	0	7.3e-06	0	4.93e-06	5.67e-06	0	6.07e-06	0	6.3e-06	4.81e-06	5.92e-06	0.798674	0.861231	0.0836657
K02856	4.96e-05	5.29e-05	5.01e-05	5.11e-05	6.37e-05	4.28e-05	5.34e-05	7.07e-05	4.74e-05	4.21e-05	5.42e-05	4.54e-05	5.14e-05	7.29e-05	4.89e-05	7.56e-05	3.85e-05	6.51e-05	0.797738	0.860496	-0.332561
K09705	1.98e-05	1.65e-05	1.37e-05	1.28e-05	1.82e-05	4.28e-06	1.67e-05	1.09e-05	1.46e-05	4.68e-06	1.97e-05	1.13e-05	9.34e-06	2.43e-05	1.22e-05	2.52e-05	9.62e-06	1.78e-05	0.797621	0.860496	-0.166205
K00631	1.98e-05	9.92e-06	3.64e-05	8.52e-06	1.37e-05	1.28e-05	1.67e-05	2.72e-05	2.55e-05	2.34e-05	1.97e-05	1.13e-05	4.67e-06	3.04e-05	8.15e-06	3.15e-05	1.92e-05	1.18e-05	0.796532	0.859574	0.135742
K02886	0.00110097	0.00111738	0.00111044	0.00106054	0.00114695	0.00110785	0.00109092	0.00100631	0.00106904	0.0011332	0.00116351	0.000947308	0.00108844	0.00108684	0.000977581	0.0011093	0.00102897	0.00120174	0.795932	0.859115	1.14455
K07060	4.96e-06	9.92e-06	4.55e-06	4.26e-06	4.55e-06	8.55e-06	1e-05	1.09e-05	7.3e-06	9.37e-06	4.93e-06	1.7e-05	4.67e-06	6.07e-06	4.07e-06	6.3e-06	4.81e-06	1.18e-05	0.795348	0.858674	-0.143939
K10549	0	3.31e-06	0	8.52e-06	4.55e-06	0	6.67e-06	5.44e-06	3.65e-06	4.68e-06	9.86e-06	0	0	6.07e-06	4.07e-06	6.3e-06	4.81e-06	0	0.795149	0.858649	-0.0807182
K02907	0.00108609	0.00109755	0.00107404	0.00105202	0.00101951	0.00105224	0.00110427	0.00109334	0.00110552	0.00108638	0.00119802	0.00111748	0.00109311	0.00100183	0.0010957	0.000995853	0.00109629	0.00105375	0.794603	0.858248	-1.57306
K11896	4.96e-06	9.92e-06	9.1e-06	4.26e-06	0	8.55e-06	0	0	0	4.68e-06	0	5.67e-06	0	6.07e-06	4.07e-06	6.3e-06	0	5.92e-06	0.794053	0.857844	0.0746892
K15532	0.000317397	0.000277692	0.000263958	0.000259811	0.000273082	0.000260921	0.00028691	0.000359008	0.000237159	0.000243498	0.000271158	0.000323333	0.000270942	0.000291443	0.000443985	0.000271023	0.00025484	0.000224957	0.793629	0.857575	-0.381372
K07572	4.96e-06	9.92e-06	9.1e-06	4.26e-06	4.55e-06	8.55e-06	1.33e-05	1.09e-05	1.46e-05	4.68e-06	9.86e-06	1.13e-05	4.67e-06	1.21e-05	4.07e-06	1.26e-05	4.81e-06	1.18e-05	0.793158	0.857255	0.162405
K00156	0	0	9.1e-06	0	0	0	0	0	0	0	0	0	0	6.07e-06	0	6.3e-06	0	0	0.792739	0.856992	-0.0291648
K07480	0	9.92e-06	4.55e-06	0	1.82e-05	4.28e-06	1.33e-05	1.09e-05	3.65e-06	0	0	0	2.8e-05	6.07e-06	3.67e-05	6.3e-06	0	0	0.79187	0.856241	-0.0518002
K17488	4.96e-06	9.92e-06	4.55e-06	4.26e-06	4.55e-06	8.55e-06	1e-05	1.09e-05	1.09e-05	4.68e-06	4.93e-06	1.7e-05	4.67e-06	6.07e-06	4.07e-06	6.3e-06	4.81e-06	1.18e-05	0.791504	0.856035	0.140289
K02439	0	0	0	1.28e-05	9.1e-06	1.28e-05	3.34e-06	5.44e-06	3.65e-06	4.68e-06	4.93e-06	5.67e-06	9.34e-06	6.07e-06	1.22e-05	0	9.62e-06	0	0.791269	0.85597	-0.083463
K10013	4.96e-06	0	0	0	0	0	3.34e-06	0	0	0	0	0	0	6.07e-06	0	0	0	0	0.790977	0.855843	0.0291229
K03465	0.000629835	0.000555385	0.000496059	0.000523881	0.000491548	0.000573171	0.000630534	0.000527633	0.000609316	0.00052914	0.000581757	0.000510525	0.000425099	0.000752893	0.000411399	0.000680709	0.000476021	0.000568313	0.790466	0.855479	0.446268
K08096	0	3.31e-06	4.55e-06	0	0	0	6.67e-06	0	0	0	0	5.67e-06	0	0	0	0	0	5.92e-06	0.79019	0.85537	0.0404616
K13280	0.000659591	0.000624808	0.00059163	0.000604806	0.000673603	0.000645887	0.000530449	0.000473238	0.000583775	0.000697716	0.00069515	0.000504853	0.000710055	0.000437164	0.000549889	0.000397081	0.000610653	0.000674872	0.789549	0.854865	0.4429
K15924	1.49e-05	3.31e-06	4.55e-06	1.28e-05	1.37e-05	1.71e-05	3.34e-06	5.44e-06	0	0	9.86e-06	2.27e-05	4.67e-06	1.21e-05	4.07e-06	1.26e-05	4.81e-06	1.18e-05	0.789217	0.854694	-0.09709
K12234	0	3.31e-06	4.55e-06	0	0	4.28e-06	3.34e-06	0	7.3e-06	4.68e-06	0	1.13e-05	0	0	0	0	4.81e-06	5.92e-06	0.788937	0.85458	-0.0580533
K07506	4.96e-05	5.29e-05	6.83e-05	6.39e-05	4.55e-05	6.42e-05	7.67e-05	5.98e-05	7.66e-05	6.56e-05	4.44e-05	6.24e-05	5.14e-05	5.46e-05	4.89e-05	7.56e-05	9.62e-05	4.14e-05	0.786857	0.852515	0.303783
K00598	4.96e-05	2.31e-05	4.1e-05	5.11e-05	4.55e-05	5.99e-05	4e-05	5.98e-05	4.74e-05	2.34e-05	5.42e-05	4.54e-05	4.67e-05	5.46e-05	4.89e-05	6.3e-05	4.81e-05	1.78e-05	0.786519	0.852338	0.25274
K01437	0	3.31e-06	4.55e-06	4.26e-06	4.55e-06	4.28e-06	3.34e-06	0	3.65e-06	4.68e-06	0	0	4.67e-06	6.07e-06	4.07e-06	6.3e-06	4.81e-06	0	0.785967	0.851929	-0.104395
K16212	8.43e-05	9.59e-05	7.28e-05	0.000102221	0.00010013	0.000102658	9.67e-05	0.000119669	0.000113106	8.43e-05	8.87e-05	0.000124795	9.81e-05	9.11e-05	0.000114051	0.000100846	0.000120207	8.29e-05	0.784773	0.850823	-0.491014
K18209	1.49e-05	1.32e-05	1.37e-05	0	0	4.28e-06	1.67e-05	0	7.3e-06	4.68e-06	4.93e-06	1.7e-05	0	1.82e-05	0	6.3e-06	9.62e-06	1.78e-05	0.784293	0.85049	-0.0847661
K04757	3.97e-05	4.96e-05	5.01e-05	3.83e-05	2.28e-05	3.42e-05	4.34e-05	8.7e-05	5.11e-05	5.62e-05	5.42e-05	5.11e-05	1.87e-05	7.89e-05	3.67e-05	8.19e-05	3.85e-05	2.37e-05	0.783567	0.849891	-0.175304
K15051	0.000332275	0.000290916	0.000304917	0.000302403	0.000359558	0.000372134	0.00026022	0.000271976	0.000273645	0.00044017	0.000295808	0.000277953	0.000373713	0.000188223	0.000358446	0.0002206	0.000355814	0.000331516	0.782542	0.848968	-0.370511
K16509	3.47e-05	2.31e-05	2.28e-05	1.28e-05	3.19e-05	1.71e-05	2e-05	1.63e-05	2.92e-05	1.4e-05	9.86e-06	2.84e-05	2.8e-05	1.82e-05	2.44e-05	1.89e-05	1.44e-05	4.14e-05	0.781951	0.848515	0.193221
K09923	0	3.31e-06	0	0	0	0	0	5.44e-06	0	0	0	0	0	0	0	6.3e-06	0	0	0.78192	0.848515	0.0302777
K01903	5.46e-05	4.96e-05	6.83e-05	3.41e-05	3.64e-05	3.42e-05	5.34e-05	3.26e-05	4.74e-05	3.75e-05	5.42e-05	4.54e-05	2.34e-05	6.68e-05	2.04e-05	6.3e-05	2.88e-05	5.33e-05	0.780881	0.847729	0.224642
K16147	0	6.61e-06	4.55e-06	8.52e-06	9.1e-06	4.28e-06	1.33e-05	1.09e-05	1.09e-05	9.37e-06	4.93e-06	5.67e-06	4.67e-06	1.21e-05	4.07e-06	6.3e-06	4.81e-06	1.18e-05	0.779623	0.846552	0.149577
K03618	4.96e-06	3.31e-06	4.55e-06	4.26e-06	4.55e-06	4.28e-06	3.34e-06	5.44e-06	3.65e-06	4.68e-06	0	0	4.67e-06	6.07e-06	4.07e-06	6.3e-06	9.62e-06	0	0.779596	0.846552	0.126786
K06880	0	6.61e-06	9.1e-06	8.52e-06	9.1e-06	4.28e-06	1.67e-05	1.63e-05	7.3e-06	0	0	5.67e-06	1.87e-05	1.21e-05	1.63e-05	1.26e-05	4.81e-06	0	0.779026	0.846278	0.0970114
K15915	1.98e-05	2.64e-05	4.1e-05	1.7e-05	2.73e-05	1.71e-05	3e-05	0	3.65e-05	2.34e-05	2.47e-05	1.7e-05	2.8e-05	3.64e-05	3.26e-05	1.26e-05	9.62e-06	1.78e-05	0.778812	0.846234	0.163089
K11635	0	3.31e-06	0	4.26e-06	0	0	0	0	0	0	0	0	0	0	4.07e-06	0	0	5.92e-06	0.777897	0.845428	-0.0371294
K00558	0.00219202	0.00215873	0.00211166	0.00239367	0.00258518	0.00239534	0.00229528	0.00260553	0.00234605	0.00228982	0.00247	0.00254695	0.00208812	0.00265334	0.00190628	0.00260939	0.00231279	0.00246861	0.77755	0.845238	-0.831789
K06927	4.96e-06	1.65e-05	9.1e-06	4.26e-06	4.55e-06	8.55e-06	1.67e-05	1.63e-05	1.46e-05	1.4e-05	9.86e-06	1.7e-05	4.67e-06	1.21e-05	4.07e-06	1.26e-05	4.81e-06	2.37e-05	0.77746	0.845238	-0.139772
K04044	9.92e-06	9.92e-06	9.1e-06	1.28e-05	2.28e-05	8.55e-06	3.34e-06	1.63e-05	3.65e-06	1.4e-05	1.48e-05	0	9.34e-06	1.82e-05	4.07e-06	1.89e-05	1.92e-05	5.92e-06	0.776922	0.844931	-0.128794
K07066	4.96e-06	0	4.55e-06	8.52e-06	9.1e-06	1.28e-05	6.67e-06	0	0	0	4.93e-06	5.67e-06	4.67e-06	6.07e-06	8.15e-06	0	0	1.18e-05	0.775932	0.844042	0.0862365
K11783	4.96e-06	1.32e-05	1.37e-05	8.52e-06	9.1e-06	8.55e-06	1e-05	1.63e-05	1.09e-05	9.37e-06	9.86e-06	0	9.34e-06	1.82e-05	8.15e-06	1.89e-05	9.62e-06	5.92e-06	0.774084	0.842218	0.166621
K07501	4.96e-06	9.92e-06	1.82e-05	8.52e-06	9.1e-06	4.28e-06	1.67e-05	1.63e-05	1.82e-05	1.4e-05	9.86e-06	5.67e-06	9.34e-06	1.82e-05	8.15e-06	1.89e-05	9.62e-06	5.92e-06	0.773895	0.842201	0.167565
K08309	0.000406665	0.000433068	0.000314019	0.000404624	0.000391418	0.000432017	0.000400339	0.000282855	0.000394048	0.000398026	0.000433852	0.000368713	0.000355027	0.000449307	0.000268835	0.000428595	0.000432746	0.000390715	0.773768	0.842201	-0.555938
K13979	4.96e-06	9.92e-06	9.1e-06	8.52e-06	1.37e-05	8.55e-06	2e-05	1.63e-05	2.19e-05	1.4e-05	0	5.67e-06	1.4e-05	2.43e-05	1.22e-05	2.52e-05	1.44e-05	1.18e-05	0.773374	0.842008	-0.145086
K00712	0	0	0	0	9.1e-06	0	0	0	0	0	0	0	0	0	0	0	0	5.92e-06	0.773347	0.842008	0.0251942
K11189	0.00115552	0.00126945	0.00111955	0.00118406	0.00117425	0.00125328	0.00112762	0.00123477	0.00111647	0.00120812	0.00108956	0.00107778	0.0011445	0.000977547	0.00143786	0.000951733	0.00147615	0.00110111	0.772369	0.841288	0.665463
K01584	9.92e-06	9.92e-06	1.82e-05	4.26e-06	0	0	1e-05	0	1.09e-05	4.68e-06	4.93e-06	5.67e-06	9.34e-06	1.82e-05	4.07e-06	1.26e-05	4.81e-06	5.92e-06	0.771856	0.840916	-0.10275
K21065	1.49e-05	6.61e-06	2.73e-05	1.28e-05	1.82e-05	1.28e-05	1.33e-05	2.72e-05	1.46e-05	2.34e-05	9.86e-06	5.67e-06	1.87e-05	3.64e-05	8.15e-06	3.78e-05	1.44e-05	5.92e-06	0.771146	0.840329	-0.13311
K10907	0.000550486	0.000505797	0.000509712	0.00063462	0.000559819	0.000581726	0.000560475	0.000630983	0.000591073	0.000561919	0.000507804	0.000538888	0.000569912	0.00056467	0.000627281	0.000573561	0.00064912	0.000467674	0.770638	0.839963	0.871733
K12554	9.92e-06	0	0	0	0	4.28e-06	0	0	0	0	0	0	0	6.07e-06	0	6.3e-06	0	5.92e-06	0.770394	0.839884	-0.0435128
K06889	0.00128943	0.00134218	0.00140626	0.00131183	0.00125618	0.0011164	0.0014212	0.00127285	0.00143025	0.00125964	0.00142481	0.00133871	0.0011772	0.00145114	0.00113644	0.00147487	0.00122131	0.0015155	0.770091	0.839741	-0.855861
K20882	0	3.31e-06	0	4.26e-06	0	0	0	5.44e-06	0	0	0	0	0	6.07e-06	4.07e-06	0	0	0	0.76876	0.838476	0.0448315
K01736	0.000857965	0.000816548	0.000901098	0.000860358	0.000819247	0.000872589	0.00089409	0.000946475	0.000868366	0.000880339	0.000887425	0.000884911	0.000854869	0.000819682	0.000940922	0.000850887	0.000928001	0.00084063	0.768471	0.838348	-1.72039
K15856	2.98e-05	3.64e-05	1.82e-05	5.54e-05	8.19e-05	5.99e-05	4.34e-05	4.9e-05	2.92e-05	2.34e-05	2.96e-05	4.54e-05	5.61e-05	6.07e-05	5.7e-05	5.67e-05	3.37e-05	1.78e-05	0.768114	0.838145	0.192115
K09944	0	3.31e-06	4.55e-06	0	0	0	3.34e-06	0	0	4.68e-06	0	0	0	0	4.07e-06	0	0	0	0.767188	0.837321	0.0458916
K17202	9.92e-06	1.32e-05	9.1e-06	1.28e-05	9.1e-06	1.71e-05	1e-05	1.63e-05	1.09e-05	9.37e-06	1.48e-05	1.13e-05	4.67e-06	1.21e-05	8.15e-06	2.52e-05	4.81e-06	1.18e-05	0.76711	0.837321	0.190969
K19139	2.48e-05	2.98e-05	2.28e-05	3.41e-05	2.73e-05	2.57e-05	4e-05	5.98e-05	3.65e-05	2.34e-05	4.44e-05	3.97e-05	3.27e-05	4.25e-05	3.26e-05	3.78e-05	1.44e-05	4.74e-05	0.766951	0.837321	-0.24661
K13818	4.96e-06	9.92e-06	9.1e-06	8.52e-06	4.55e-06	4.28e-06	6.67e-06	5.44e-06	0	9.37e-06	9.86e-06	0	1.87e-05	0	2.44e-05	0	0	0	0.766884	0.837321	-0.073589
K19142	0	3.31e-06	1.37e-05	1.28e-05	1.37e-05	8.55e-06	2e-05	0	1.46e-05	4.68e-06	4.93e-06	1.13e-05	1.4e-05	1.82e-05	1.22e-05	1.89e-05	4.81e-06	5.92e-06	0.766148	0.836933	-0.124743
K17104	4.96e-06	9.92e-06	9.1e-06	4.26e-06	4.55e-06	8.55e-06	1.33e-05	1.09e-05	1.09e-05	4.68e-06	9.86e-06	1.7e-05	4.67e-06	1.21e-05	4.07e-06	1.26e-05	4.81e-06	1.18e-05	0.766078	0.836933	-0.174635
K07262	4.96e-06	3.31e-06	4.55e-06	4.26e-06	4.55e-06	4.28e-06	3.34e-06	5.44e-06	3.65e-06	4.68e-06	0	0	9.34e-06	6.07e-06	4.07e-06	6.3e-06	4.81e-06	0	0.765888	0.836933	0.136685
K16692	4.96e-06	3.31e-06	9.1e-06	8.52e-06	9.1e-06	1.28e-05	6.67e-06	5.44e-06	7.3e-06	9.37e-06	0	0	4.67e-06	1.21e-05	8.15e-06	1.26e-05	1.44e-05	0	0.764517	0.835711	0.125433
K16843	0	0	0	0	0	0	3.34e-06	0	3.65e-06	4.68e-06	0	0	4.67e-06	0	0	0	0	0	0.763927	0.835252	-0.0401519
K18151	0	0	4.55e-06	4.26e-06	4.55e-06	0	3.34e-06	0	3.65e-06	0	0	0	4.67e-06	6.07e-06	0	6.3e-06	0	0	0.763651	0.835137	0.0656651
K07038	3.47e-05	4.63e-05	2.28e-05	1.7e-05	6.83e-05	5.13e-05	2.34e-05	4.35e-05	1.82e-05	2.81e-05	2.96e-05	2.84e-05	3.74e-05	4.25e-05	5.7e-05	3.15e-05	4.81e-05	4.14e-05	0.763576	0.835137	-0.210509
K04078	0.00120512	0.00116366	0.0011423	0.00116702	0.00119701	0.00117201	0.00115765	0.00105526	0.00116025	0.00118939	0.0012424	0.00111748	0.00109311	0.0011172	0.00108756	0.00117233	0.00117322	0.00116623	0.762782	0.834559	1.98335
K07689	0	0	4.55e-06	0	0	0	0	5.44e-06	3.65e-06	0	4.93e-06	5.67e-06	0	0	0	0	0	0	0.762481	0.834416	0.0468249
K07453	0	0	4.55e-06	8.52e-06	4.55e-06	0	0	5.44e-06	0	0	0	5.67e-06	4.67e-06	0	4.07e-06	0	4.81e-06	0	0.761176	0.833175	0.0653903
K02488	1.49e-05	9.92e-06	4.55e-06	8.52e-06	1.37e-05	1.71e-05	1.67e-05	1.09e-05	1.46e-05	0	1.48e-05	5.67e-06	1.4e-05	3.04e-05	4.07e-06	2.52e-05	0	5.92e-06	0.760462	0.832579	0.116393
K00285	4.96e-06	3.31e-06	4.55e-06	4.26e-06	4.55e-06	4.28e-06	3.34e-06	5.44e-06	3.65e-06	0	0	0	9.34e-06	6.07e-06	8.15e-06	6.3e-06	4.81e-06	0	0.759968	0.832224	0.119381
K03544	0.0010117	0.00100168	0.000951159	0.00100943	0.00111053	0.0010223	0.00103087	0.00103351	0.00109093	0.0010255	0.00106984	0.00101538	0.00106508	0.000922901	0.00112014	0.000926521	0.00102417	0.00101823	0.759848	0.832224	1.49064
K00702	0.000173577	0.000168599	0.000122877	0.000166109	0.000227569	0.000209592	0.000193497	0.000168625	0.000193376	0.000187306	0.000172555	0.000215555	0.000154157	0.00017608	0.000240322	0.00017648	0.000192332	0.000147998	0.759667	0.832224	-0.507481
K00713	9.92e-06	1.32e-05	4.55e-06	4.26e-06	4.55e-06	8.55e-06	1.67e-05	5.44e-06	1.46e-05	4.68e-06	0	1.7e-05	9.34e-06	6.07e-06	4.07e-06	1.26e-05	9.62e-06	1.18e-05	0.759523	0.832224	0.143466
K03740	9.92e-06	9.92e-06	4.55e-06	8.52e-06	4.55e-06	4.28e-06	1e-05	5.44e-06	7.3e-06	9.37e-06	4.93e-06	1.13e-05	4.67e-06	1.21e-05	8.15e-06	1.26e-05	0	5.92e-06	0.758329	0.831174	-0.178188
K02908	4.96e-06	9.92e-06	9.1e-06	4.26e-06	1.82e-05	1.28e-05	1.33e-05	1.09e-05	1.82e-05	9.37e-06	1.48e-05	1.13e-05	4.67e-06	1.82e-05	4.07e-06	1.89e-05	9.62e-06	1.78e-05	0.758118	0.831128	-0.180891
K07558	4.96e-06	9.92e-06	9.1e-06	4.26e-06	4.55e-06	8.55e-06	1.33e-05	1.09e-05	1.09e-05	4.68e-06	9.86e-06	1.13e-05	4.67e-06	1.21e-05	4.07e-06	1.26e-05	4.81e-06	1.78e-05	0.757793	0.830958	-0.177601
K15986	0.000362031	0.000386786	0.000400488	0.00037055	0.000400521	0.00042774	0.000310263	0.000342689	0.000353914	0.000379295	0.00036976	0.000346023	0.000425099	0.000309658	0.000460278	0.000340355	0.00039428	0.000384795	0.756165	0.829359	-0.768459
K01873	0.000783575	0.000783489	0.000691752	0.000736841	0.000819247	0.000757099	0.000773989	0.000723455	0.000758908	0.000744542	0.0007198	0.000805496	0.000775455	0.000783252	0.0007006	0.000800464	0.000750094	0.00079919	0.755765	0.829106	-1.68681
K02963	0.00119024	0.00123639	0.00116051	0.00114998	0.00125618	0.00118056	0.00116766	0.00108246	0.00118944	0.00119408	0.00128677	0.00122526	0.00121457	0.00114755	0.00111607	0.00114712	0.00114918	0.00120174	0.755757	0.829106	-1.92164
K02961	0.0011704	0.001243	0.00123332	0.00117554	0.00124708	0.00121478	0.00116766	0.00115318	0.00122593	0.00118471	0.00131142	0.00120257	0.00123325	0.00119006	0.00103461	0.00125427	0.00124054	0.00126094	0.755448	0.829106	-1.66393
K21592	9.92e-06	3.31e-06	9.1e-06	1.28e-05	9.1e-06	8.55e-06	6.67e-06	5.44e-06	3.65e-06	9.37e-06	1.48e-05	5.67e-06	1.4e-05	0	8.15e-06	0	4.81e-06	5.92e-06	0.755437	0.829106	0.140652
K11751	0.000381869	0.000300833	0.000314019	0.000306662	0.000304942	0.000252366	0.000316935	0.00033181	0.000342968	0.000290325	0.000320459	0.00029497	0.000336342	0.000303586	0.000232175	0.000302538	0.000322156	0.000396635	0.75517	0.829106	0.663779
K07289	4.96e-06	0	4.55e-06	4.26e-06	0	0	0	0	0	0	4.93e-06	0	0	6.07e-06	0	6.3e-06	0	0	0.755068	0.829106	-0.0550615
K00390	0.000123983	0.000115705	0.00013653	0.000132035	0.000122887	0.000136877	0.000110093	0.00011423	0.000109458	0.000112384	0.000128184	0.000147485	9.81e-05	0.000103219	0.000142564	0.000113452	0.000134632	0.000142078	0.754966	0.829106	-0.685922
K07051	0	6.61e-06	1.37e-05	4.26e-06	0	4.28e-06	6.67e-06	0	3.65e-06	0	4.93e-06	1.13e-05	0	0	0	0	4.81e-06	1.18e-05	0.753758	0.828204	0.0719519
K03697	1.98e-05	2.64e-05	1.37e-05	4.26e-06	5.46e-05	3.85e-05	1.67e-05	3.81e-05	2.55e-05	1.87e-05	3.94e-05	0	3.74e-05	1.21e-05	4.07e-05	0	4.33e-05	2.37e-05	0.751911	0.826359	0.130672
K18831	7.44e-05	3.64e-05	6.83e-05	4.26e-05	5.46e-05	5.13e-05	4.67e-05	2.72e-05	4.38e-05	3.28e-05	3.94e-05	3.97e-05	3.27e-05	7.29e-05	3.26e-05	9.45e-05	3.37e-05	4.14e-05	0.751616	0.82622	0.217562
K04784	4.96e-06	6.61e-06	4.55e-06	4.26e-06	4.55e-06	0	0	0	0	0	0	0	4.67e-06	6.07e-06	4.07e-06	6.3e-06	0	0	0.750739	0.825442	0.0781689
K20525	4.96e-06	3.31e-06	4.55e-06	0	0	0	0	5.44e-06	0	0	0	0	4.67e-06	6.07e-06	4.07e-06	0	0	0	0.748773	0.823466	0.0631848
K03232	4.96e-06	1.32e-05	4.55e-06	4.26e-06	4.55e-06	8.55e-06	1.33e-05	1.63e-05	1.09e-05	4.68e-06	9.86e-06	1.7e-05	4.67e-06	1.21e-05	4.07e-06	1.26e-05	4.81e-06	1.78e-05	0.748244	0.823068	-0.158588
K01952	0.000540567	0.000532244	0.000559773	0.000523881	0.00056437	0.000538952	0.00050376	0.000696258	0.000532695	0.000482314	0.000517665	0.000510525	0.000616626	0.000540383	0.000647647	0.000497926	0.000596228	0.000503194	0.748094	0.823068	0.820779
K02866	4.96e-06	1.32e-05	9.1e-06	4.26e-06	1.37e-05	8.55e-06	1.67e-05	1.09e-05	1.46e-05	4.68e-06	1.48e-05	1.13e-05	4.67e-06	2.43e-05	4.07e-06	1.26e-05	9.62e-06	1.78e-05	0.748089	0.823068	-0.168297
K11050	0.000188455	0.000208269	0.000177489	0.00021296	0.000172952	0.000136877	0.000196833	0.000130548	0.000197024	0.000220085	0.000197206	0.000277953	0.000126128	0.000157865	0.000118124	0.000157572	0.000158674	0.000272317	0.747924	0.823068	-0.340272
K16783	0	3.31e-06	0	0	0	4.28e-06	0	0	0	0	0	0	0	0	0	0	0	1.18e-05	0.747332	0.822804	-0.03072
K14155	0.000714144	0.000624808	0.000655344	0.000685731	0.000614435	0.000658719	0.000617189	0.00078329	0.000689585	0.000655572	0.000675429	0.000629648	0.000686698	0.000643602	0.000806504	0.000623984	0.000711627	0.000686712	0.747096	0.82273	-1.0621
K21701	1.49e-05	6.61e-06	4.55e-06	1.7e-05	4.55e-06	8.55e-06	1.33e-05	0	1.46e-05	1.4e-05	9.86e-06	5.67e-06	2.8e-05	1.21e-05	8.15e-06	6.3e-06	9.62e-06	0	0.744793	0.820378	-0.125558
K05565	0	6.61e-06	9.1e-06	0	0	8.55e-06	1e-05	0	7.3e-06	0	9.86e-06	5.67e-06	9.34e-06	6.07e-06	4.07e-06	6.3e-06	0	5.92e-06	0.74354	0.819182	-0.107712
K21053	0	0	0	0	0	0	3.34e-06	0	3.65e-06	4.68e-06	4.93e-06	0	0	0	0	0	0	0	0.74339	0.819182	-0.0436326
K18678	3.47e-05	2.31e-05	3.19e-05	1.28e-05	1.82e-05	4.71e-05	3.34e-05	1.63e-05	3.65e-05	4.21e-05	2.47e-05	3.4e-05	1.4e-05	3.64e-05	1.63e-05	3.15e-05	9.62e-06	2.96e-05	0.743364	0.819182	0.214857
K06187	0.00127951	0.00125623	0.00128338	0.00122239	0.00123342	0.00124472	0.00123771	0.00107702	0.00125147	0.00125495	0.00127198	0.00122526	0.00121457	0.00118399	0.0011731	0.00128579	0.00116361	0.00123726	0.74297	0.819108	2.02596
K07443	0.00014878	0.000201658	0.000204795	0.000144813	0.000127438	0.000111212	0.000156799	0.00011423	0.000142295	0.000131114	0.000142974	0.00018152	0.000158828	0.000151793	8.96e-05	0.000157572	0.000129824	0.000165758	0.742666	0.818957	0.428289
K00936	1.98e-05	2.64e-05	2.28e-05	2.13e-05	2.28e-05	2.14e-05	2e-05	1.63e-05	2.55e-05	1.87e-05	9.86e-06	3.4e-05	2.34e-05	1.21e-05	2.44e-05	1.26e-05	2.88e-05	2.37e-05	0.742608	0.818957	0.304366
K16788	1.98e-05	1.65e-05	1.82e-05	1.28e-05	2.73e-05	2.57e-05	1e-05	2.18e-05	1.09e-05	1.4e-05	1.97e-05	0	3.27e-05	2.43e-05	3.26e-05	3.15e-05	9.62e-06	1.18e-05	0.742254	0.818871	-0.178328
K19824	0	3.31e-06	4.55e-06	0	0	0	3.34e-06	0	3.65e-06	0	0	5.67e-06	0	0	0	0	0	5.92e-06	0.741574	0.818306	0.0566732
K05571	0.000104146	0.000122317	0.000122877	0.000144813	0.000113784	0.000124045	0.000126774	0.000130548	0.000124052	0.000112384	0.000128184	0.000124795	0.000144814	0.000127506	0.000154784	9.45e-05	9.62e-05	0.000106559	0.741408	0.818306	0.652348
K09924	4.96e-06	6.61e-06	9.1e-06	0	0	4.28e-06	2e-05	5.44e-06	1.46e-05	0	4.93e-06	0	4.67e-06	1.82e-05	8.15e-06	1.89e-05	0	0	0.741241	0.818306	0.0828043
K10543	1.49e-05	1.65e-05	2.73e-05	3.83e-05	4.1e-05	8.55e-06	4e-05	3.26e-05	4.74e-05	3.75e-05	2.96e-05	5.67e-05	2.8e-05	2.43e-05	2.85e-05	3.15e-05	2.4e-05	2.37e-05	0.741114	0.818306	-0.223758
K01104	0.00155723	0.00154384	0.00154279	0.00161849	0.00167946	0.0016853	0.00152462	0.0015285	0.00154336	0.00163425	0.00144453	0.00153725	0.00169572	0.00144507	0.00164967	0.00136142	0.00173099	0.00158062	0.739124	0.816339	1.39977
K21344	9.92e-06	9.92e-06	4.55e-06	8.52e-06	4.55e-06	4.28e-06	6.67e-06	5.44e-06	7.3e-06	4.68e-06	4.93e-06	0	9.34e-06	1.21e-05	8.15e-06	1.89e-05	9.62e-06	0	0.736591	0.813725	-0.142585
K02884	0.00122496	0.00115375	0.00111044	0.00119257	0.00118791	0.00115917	0.00116766	0.00104439	0.00114931	0.00116598	0.00122761	0.00112883	0.00118187	0.00114755	0.00102646	0.0010967	0.00112514	0.00120766	0.736497	0.813725	1.82839
K07227	9.92e-06	0	4.55e-06	0	0	1.28e-05	0	5.44e-06	0	4.68e-06	0	0	9.34e-06	6.07e-06	0	6.3e-06	0	0	0.736135	0.813587	0.0682205
K02860	0.0011952	0.00117689	0.00111955	0.00112017	0.00118336	0.00118912	0.00111761	0.00107158	0.00114201	0.00118471	0.00119309	0.00114585	0.00120055	0.00110505	0.00110385	0.00115973	0.00106263	0.00123135	0.735702	0.813292	-2.12448
K03625	0.00116544	0.00120995	0.0011332	0.00121387	0.00118791	0.00118056	0.00111428	0.00110966	0.00113106	0.00118003	0.00114379	0.00114585	0.0012099	0.00113541	0.00109163	0.00111561	0.00114437	0.00121951	0.735197	0.812919	2.55846
K02460	0	6.61e-06	1.37e-05	0	0	0	3.34e-06	5.44e-06	3.65e-06	4.68e-06	0	5.67e-06	0	6.07e-06	0	0	4.81e-06	5.92e-06	0.734678	0.812528	0.0790562
K01198	0.000198373	0.000228104	0.000200244	0.000293885	0.000286736	0.000282308	0.000283573	0.000326371	0.000248105	0.000243498	0.000246507	0.00029497	0.000210214	0.000273227	0.00033808	0.000252115	0.000211565	0.000213117	0.732678	0.810499	0.538885
K00955	9.92e-06	2.31e-05	3.19e-05	2.98e-05	3.64e-05	3.42e-05	3.34e-05	3.81e-05	2.92e-05	3.75e-05	2.96e-05	4.54e-05	2.34e-05	1.82e-05	6.11e-05	2.52e-05	1.92e-05	2.37e-05	0.732419	0.810396	-0.238727
K21055	0	6.61e-06	0	4.26e-06	9.1e-06	8.55e-06	3.34e-06	0	3.65e-06	4.68e-06	4.93e-06	0	0	6.07e-06	4.07e-06	6.3e-06	4.81e-06	0	0.732413	0.810396	0.107192
K03487	2.48e-05	2.64e-05	1.37e-05	3.41e-05	3.19e-05	1.71e-05	1.33e-05	2.72e-05	1.82e-05	1.87e-05	9.86e-06	2.27e-05	2.34e-05	2.43e-05	4.07e-05	6.3e-06	2.4e-05	2.37e-05	0.73157	0.809822	0.232084
K01866	0.000991867	0.000981841	0.000978465	0.000937024	0.00104681	0.000941028	0.000954141	0.00089208	0.000941338	0.00101145	0.000961377	0.000998361	0.000938954	0.00102005	0.000883896	0.000964338	0.000884726	0.00108335	0.731199	0.809595	-1.61154
K13527	4.96e-06	0	0	0	0	0	3.34e-06	0	3.65e-06	4.68e-06	0	0	0	0	0	0	4.81e-06	5.92e-06	0.730968	0.809522	-0.060052
K18856	2.98e-05	1.98e-05	3.19e-05	2.56e-05	9.1e-06	2.57e-05	3.67e-05	2.18e-05	3.65e-05	1.87e-05	4.93e-05	3.97e-05	1.87e-05	2.43e-05	3.26e-05	2.52e-05	1.92e-05	2.37e-05	0.730184	0.808837	-0.257292
K11892	0	6.61e-06	9.1e-06	1.28e-05	4.55e-06	4.28e-06	0	0	0	0	0	0	0	6.07e-06	8.15e-06	6.3e-06	4.81e-06	5.92e-06	0.72992	0.808727	0.0862248
K03702	0.000912517	0.000892583	0.00081918	0.000817766	0.000873863	0.000851202	0.000864065	0.000766971	0.000817286	0.000908435	0.000852914	0.000833858	0.000873554	0.000819682	0.000806504	0.000831978	0.000865493	0.000882069	0.728747	0.807611	-2.00007
K03732	2.48e-05	3.31e-05	3.19e-05	2.13e-05	2.28e-05	2.57e-05	4e-05	2.18e-05	4.74e-05	2.81e-05	3.45e-05	3.4e-05	9.34e-06	3.64e-05	1.63e-05	3.78e-05	2.88e-05	2.96e-05	0.728528	0.80755	0.290247
K12371	0	0	0	0	0	0	3.34e-06	0	0	0	0	5.67e-06	0	0	0	0	0	0	0.727909	0.807048	-0.0300634
K15039	0	0	0	0	0	0	3.34e-06	0	0	0	0	5.67e-06	0	0	0	0	0	0	0.727909	0.807048	-0.0300634
K01448	0.00191926	0.00194715	0.0018113	0.00186979	0.00195254	0.00214298	0.0018082	0.00188751	0.00183889	0.00187306	0.00204601	0.00179251	0.00202739	0.00177901	0.00219956	0.00177111	0.00204353	0.0018411	0.727896	0.807048	-1.37302
K05592	0.000411625	0.000380174	0.000436896	0.000396105	0.000423278	0.000423462	0.000393667	0.000456919	0.000397697	0.000360565	0.000438782	0.000357368	0.000453127	0.000473594	0.000492864	0.000415989	0.00039428	0.000390715	0.727338	0.806962	-1.01878
K01625	0.000719103	0.000697537	0.000741813	0.000817766	0.000646295	0.000718603	0.000740627	0.000745213	0.000747962	0.000693033	0.00069515	0.000697718	0.00076144	0.000716463	0.000794284	0.000756344	0.000721244	0.000674872	0.726931	0.806694	1.59222
K02171	0.000168617	0.00015207	0.000163836	0.000170368	0.000159298	0.000205315	0.000143455	0.000184943	0.000142295	0.000182624	0.000138044	0.000147485	0.000158828	0.000157865	0.000183296	0.000157572	0.000182715	0.000153918	0.726617	0.806528	0.832359
K07788	0	3.31e-06	0	0	0	0	0	5.44e-06	0	0	0	0	0	6.07e-06	0	6.3e-06	0	0	0.726014	0.806042	-0.0460162
K07789	0	3.31e-06	0	0	0	0	0	5.44e-06	0	0	0	0	0	6.07e-06	0	6.3e-06	0	0	0.726014	0.806042	-0.0460162
K03584	0.00113569	0.00107441	0.00103308	0.0010435	0.00109688	0.00110785	0.000977494	0.000941036	0.000992418	0.00113788	0.00108956	0.00101538	0.00112114	0.000971475	0.00101831	0.00102106	0.00100493	0.00111887	0.724603	0.804841	-1.56515
K19091	4.96e-05	4.63e-05	3.19e-05	5.11e-05	7.74e-05	7.27e-05	3.67e-05	4.9e-05	4.38e-05	3.75e-05	4.44e-05	4.54e-05	6.07e-05	6.07e-05	6.52e-05	5.04e-05	3.85e-05	3.55e-05	0.724243	0.804623	0.354878
K00076	1.49e-05	3.31e-06	9.1e-06	4.26e-06	4.55e-06	4.28e-06	3.34e-06	2.72e-05	0	9.37e-06	4.93e-06	5.67e-06	9.34e-06	1.21e-05	1.63e-05	1.26e-05	4.81e-06	5.92e-06	0.722783	0.803184	-0.121608
K15023	8.93e-05	6.94e-05	9.56e-05	0.000110739	6.37e-05	8.55e-05	7.34e-05	7.07e-05	8.03e-05	7.49e-05	8.87e-05	7.37e-05	7.01e-05	9.71e-05	9.37e-05	9.45e-05	0.000110591	5.92e-05	0.722539	0.803094	-0.509549
K12528	0	6.61e-06	4.55e-06	0	4.55e-06	0	6.67e-06	0	1.09e-05	4.68e-06	4.93e-06	5.67e-06	0	0	0	0	0	1.18e-05	0.722447	0.803094	0.0788765
K01002	0.000143821	0.000138846	0.000141081	0.000110739	0.000113784	0.000124045	0.000150127	8.16e-05	0.00015689	0.00015921	9.86e-05	7.37e-05	0.000149485	8.5e-05	0.00017515	8.19e-05	0.000163482	0.000124318	0.722366	0.803094	0.367693
K01007	2.98e-05	4.63e-05	3.64e-05	2.13e-05	3.64e-05	2.99e-05	2e-05	3.81e-05	2.19e-05	1.87e-05	2.47e-05	3.4e-05	2.8e-05	4.86e-05	1.63e-05	3.78e-05	1.44e-05	4.14e-05	0.722277	0.803094	0.272413
K00027	0.000406665	0.000462821	0.000391386	0.000438697	0.000423278	0.000461959	0.000470398	0.000456919	0.000470669	0.000430804	0.000478224	0.000459473	0.00042977	0.000382518	0.000496937	0.000397081	0.000471213	0.000491354	0.722138	0.803094	-1.19324
K10237	0	3.31e-06	0	4.26e-06	9.1e-06	0	0	0	0	0	0	0	0	1.21e-05	4.07e-06	6.3e-06	0	0	0.721749	0.803094	-0.0549603
K08173	0	3.31e-06	0	0	0	0	0	1.09e-05	0	0	4.93e-06	0	4.67e-06	0	0	0	0	0	0.721209	0.802709	0.0422345
K01720	0	3.31e-06	0	0	0	0	3.34e-06	1.09e-05	0	0	0	0	0	1.21e-05	0	1.26e-05	0	0	0.721054	0.802709	-0.0483759
K00041	0.000218211	0.000224799	0.000191142	0.000229997	0.000195709	0.000183928	0.000223523	0.000288294	0.000229862	0.000201354	0.000192275	0.00024959	0.000247585	0.000206438	0.000289201	0.00017648	0.000201948	0.000165758	0.721046	0.802709	0.584684
K03055	4.96e-06	1.32e-05	4.55e-06	4.26e-06	4.55e-06	8.55e-06	1.33e-05	1.09e-05	1.09e-05	4.68e-06	9.86e-06	1.13e-05	4.67e-06	1.21e-05	4.07e-06	1.26e-05	4.81e-06	1.78e-05	0.720815	0.802709	-0.191681
K00043	0	0	0	0	0	0	0	0	3.65e-06	0	0	0	0	0	0	6.3e-06	0	0	0.720651	0.802709	-0.0308312
K15898	9.92e-06	3.64e-05	2.73e-05	2.13e-05	2.73e-05	2.99e-05	3e-05	3.81e-05	2.92e-05	2.34e-05	3.45e-05	2.27e-05	9.34e-06	3.04e-05	6.11e-05	3.15e-05	1.92e-05	3.55e-05	0.719803	0.802057	-0.234499
K09710	0.00106626	0.00108432	0.000996669	0.0010861	0.0010104	0.00103085	0.00105423	0.00107158	0.00111282	0.00109106	0.00105505	0.00100403	0.00110713	0.000941116	0.00103461	0.00101476	0.00113476	0.00105375	0.718432	0.800712	2.05486
K04485	0.000803412	0.000743819	0.000787323	0.000787952	0.000819247	0.000859757	0.000737291	0.000805048	0.000744314	0.000753908	0.000744451	0.000720408	0.000780126	0.000795395	0.00083909	0.000762647	0.000841451	0.00078735	0.718239	0.800678	1.86268
K04031	0.000252926	0.000214881	0.000222999	0.000191664	0.000159298	0.000183928	0.000123438	0.000261097	0.000138647	0.00021072	0.000182415	0.000141813	0.000210214	9.71e-05	0.000281054	0.000100846	0.000288498	0.000142078	0.718113	0.800678	0.302516
K21030	4.96e-05	8.6e-05	6.37e-05	8.52e-05	9.56e-05	8.98e-05	0.000100085	6.53e-05	0.000102161	7.49e-05	0.000103533	8.51e-05	6.07e-05	5.46e-05	0.000101831	6.3e-05	7.69e-05	8.88e-05	0.716558	0.799168	0.43605
K13530	1.49e-05	6.61e-06	4.55e-06	8.52e-06	4.55e-06	0	1e-05	0	1.46e-05	4.68e-06	4.93e-06	5.67e-06	4.67e-06	6.07e-06	4.07e-06	6.3e-06	1.44e-05	5.92e-06	0.716208	0.79896	0.14558
K08299	0	3.31e-06	0	0	0	0	0	0	3.65e-06	0	0	0	0	0	4.07e-06	0	0	5.92e-06	0.715796	0.798683	-0.0476108
K03660	0.000431462	0.000482656	0.000368631	0.000408883	0.000486997	0.000444849	0.000397003	0.000353568	0.000401346	0.000454218	0.000448643	0.0004538	0.00039707	0.000455379	0.000334007	0.000441201	0.000375047	0.000491354	0.715075	0.79806	-0.866243
K03634	1.98e-05	2.31e-05	3.19e-05	1.28e-05	1.37e-05	1.28e-05	1.67e-05	1.63e-05	2.55e-05	3.28e-05	9.86e-06	1.13e-05	1.87e-05	3.04e-05	2.04e-05	2.52e-05	2.4e-05	1.18e-05	0.714819	0.797956	-0.258071
K01677	0.000337235	0.000370257	0.000345876	0.000391846	0.000377764	0.000397798	0.00039033	0.000402524	0.00044148	0.000374613	0.000409202	0.000402748	0.000406413	0.000333945	0.000517303	0.000321446	0.000427938	0.000337436	0.714805	0.797956	-0.788728
K07103	4.96e-06	9.92e-06	9.1e-06	4.26e-06	4.55e-06	4.28e-06	1.33e-05	1.09e-05	1.82e-05	4.68e-06	9.86e-06	1.7e-05	4.67e-06	1.82e-05	4.07e-06	1.26e-05	4.81e-06	1.18e-05	0.714357	0.797804	-0.174907
K11743	0	6.61e-06	4.55e-06	4.26e-06	4.55e-06	0	6.67e-06	1.09e-05	3.65e-06	9.37e-06	0	0	0	6.07e-06	4.07e-06	1.26e-05	9.62e-06	5.92e-06	0.714048	0.797642	-0.118549
K20608	0	3.31e-06	0	4.26e-06	4.55e-06	0	3.34e-06	0	3.65e-06	4.68e-06	0	0	0	0	0	0	4.81e-06	5.92e-06	0.713954	0.797642	0.0804806
K03076	0.00104146	0.00106449	0.000973914	0.00102221	0.00104681	0.00105224	0.00104755	0.00101175	0.00101796	0.00104892	0.00105012	0.000998361	0.00105574	0.00100183	0.000965361	0.000995853	0.00100493	0.00110111	0.713539	0.797437	2.85021
K21393	0	3.31e-06	4.55e-06	4.26e-06	0	4.28e-06	6.67e-06	5.44e-06	3.65e-06	4.68e-06	0	0	4.67e-06	0	8.15e-06	0	9.62e-06	0	0.713436	0.797437	0.101844
K02573	4.96e-06	6.61e-06	9.1e-06	8.52e-06	9.1e-06	4.28e-06	1.33e-05	5.44e-06	1.82e-05	2.81e-05	0	0	9.34e-06	6.07e-06	8.15e-06	1.89e-05	1.44e-05	5.92e-06	0.713419	0.797437	-0.129777
K03470	0.00114561	0.00115375	0.0011332	0.00112443	0.0011606	0.00114634	0.00113763	0.00104439	0.00115296	0.00112852	0.00119309	0.00117421	0.00115851	0.00115363	0.00103461	0.0011093	0.00112514	0.0011899	0.712741	0.797091	-2.6184
K21584	0	0	4.55e-06	4.26e-06	0	0	6.67e-06	0	3.65e-06	4.68e-06	0	5.67e-06	4.67e-06	0	0	0	0	0	0.712608	0.797091	0.0723797
K01912	0.000441381	0.000561996	0.000459651	0.000468512	0.000377764	0.000479069	0.000527113	0.000538512	0.000536344	0.00044017	0.000502874	0.000561578	0.000387727	0.000546455	0.000476571	0.000504229	0.000389472	0.000485434	0.712297	0.796959	0.791222
K13931	0	3.31e-06	0	4.26e-06	4.55e-06	4.28e-06	3.34e-06	5.44e-06	3.65e-06	0	0	5.67e-06	0	1.21e-05	0	1.26e-05	4.81e-06	0	0.711455	0.796199	-0.0885456
K00789	0.00122	0.00122317	0.00119691	0.00123943	0.00126983	0.00127039	0.00130777	0.00114774	0.00124417	0.00125495	0.00127691	0.00123661	0.00115851	0.00117791	0.00111607	0.00126688	0.00127901	0.00126686	0.711134	0.796021	2.27585
K01929	0.000947233	0.0010149	0.000978465	0.00100517	0.00104226	0.000962415	0.000957477	0.000886641	0.000901203	0.0010255	0.00100082	0.000896256	0.00099034	0.000922901	0.000957215	0.000983247	0.000971275	0.00102415	0.710942	0.795989	-2.02817
K00948	0.00107617	0.00106118	0.00108314	0.0010648	0.00111053	0.00110357	0.00116098	0.00109334	0.00110917	0.00104423	0.000981098	0.00110614	0.00116785	0.00102612	0.00119346	0.000983247	0.00122131	0.00103007	0.710283	0.795432	1.58886
K07728	9.92e-06	1.32e-05	4.55e-06	4.26e-06	4.55e-06	8.55e-06	1.33e-05	1.09e-05	1.09e-05	4.68e-06	9.86e-06	1.7e-05	4.67e-06	1.21e-05	4.07e-06	1.26e-05	4.81e-06	1.78e-05	0.710149	0.795432	-0.199356
K21993	0.000396747	0.000393398	0.00040959	0.000464253	0.000409623	0.000397798	0.000433701	0.00045148	0.000426886	0.000379295	0.000384551	0.000436783	0.000415756	0.000382518	0.000448058	0.000397081	0.000461596	0.000432155	0.707909	0.793137	1.48352
K06988	9.92e-06	6.61e-06	9.1e-06	0	4.55e-06	0	1.33e-05	1.09e-05	3.65e-06	4.68e-06	0	1.13e-05	4.67e-06	6.07e-06	0	0	4.81e-06	1.78e-05	0.706654	0.791912	0.112193
K03596	0.000917477	0.000866136	0.000882894	0.000873136	0.000919377	0.000846925	0.000780661	0.000810487	0.000813637	0.000861609	0.000847984	0.000850876	0.000906254	0.000837897	0.000835017	0.00090131	0.000802985	0.000941268	0.705704	0.791029	-1.90462
K02598	2.98e-05	3.31e-05	2.73e-05	3.83e-05	3.19e-05	4.28e-05	1.67e-05	5.44e-05	1.09e-05	2.81e-05	2.47e-05	2.84e-05	4.67e-05	4.25e-05	5.3e-05	3.78e-05	4.81e-05	0	0.705181	0.790623	-0.226631
K09858	3.97e-05	3.64e-05	5.46e-05	3.83e-05	3.19e-05	2.57e-05	4e-05	4.9e-05	4.38e-05	4.21e-05	3.94e-05	3.97e-05	2.8e-05	5.46e-05	2.44e-05	5.67e-05	3.37e-05	2.37e-05	0.704979	0.790578	0.377539
K17686	0.000213251	0.000300833	0.00022755	0.000255552	0.000245774	0.000269476	0.000266893	0.000168625	0.00023351	0.000280959	0.000211996	0.000266608	0.000205542	0.00024894	0.000248468	0.000258417	0.00022599	0.000290076	0.704729	0.790478	-0.733335
K04082	4.96e-06	6.61e-06	4.55e-06	1.28e-05	1.37e-05	8.55e-06	3.34e-06	5.44e-06	3.65e-06	4.68e-06	4.93e-06	0	9.34e-06	1.21e-05	8.15e-06	1.26e-05	4.81e-06	0	0.704033	0.789879	0.159285
K13665	4.96e-06	3.31e-06	0	8.52e-06	4.55e-06	0	0	5.44e-06	3.65e-06	0	0	0	4.67e-06	6.07e-06	8.15e-06	6.3e-06	0	0	0.704009	0.789879	0.0983292
K00384	0.00119024	0.0012397	0.00110589	0.00112017	0.00114695	0.0011164	0.00126107	0.00105526	0.0011712	0.00117535	0.00127198	0.00115152	0.00113515	0.00113541	0.00110385	0.0010967	0.00105302	0.00117807	0.702592	0.788623	1.83062
K03817	1.49e-05	9.92e-06	2.28e-05	4.26e-06	0	8.55e-06	3.34e-06	5.44e-06	1.09e-05	0	1.48e-05	5.67e-06	1.4e-05	2.43e-05	4.07e-06	1.89e-05	4.81e-06	5.92e-06	0.702429	0.788622	-0.130794
K00023	0	6.61e-06	1.37e-05	4.26e-06	4.55e-06	4.28e-06	6.67e-06	5.44e-06	7.3e-06	1.4e-05	0	5.67e-06	0	6.07e-06	4.07e-06	6.3e-06	1.92e-05	5.92e-06	0.701709	0.787994	-0.127513
K02992	0.00118032	0.00115044	0.00111955	0.00117128	0.00117881	0.00123617	0.00115097	0.00104439	0.00120769	0.00122686	0.00116844	0.00112316	0.00112114	0.00122649	0.00106312	0.00114082	0.00104821	0.00121951	0.701574	0.787994	1.92201
K06287	0.00111585	0.00103804	0.00107404	0.0010861	0.00100585	0.00110357	0.00115431	0.00103895	0.00109823	0.0011332	0.00108956	0.0011345	0.00113982	0.00100183	0.00103053	0.00102106	0.00112995	0.00111887	0.701274	0.787867	-2.18329
K04772	9.92e-06	6.61e-06	2.28e-05	1.28e-05	1.82e-05	1.71e-05	6.67e-06	1.63e-05	1.09e-05	1.4e-05	4.93e-06	5.67e-06	2.34e-05	6.07e-06	2.85e-05	6.3e-06	1.44e-05	5.92e-06	0.700518	0.787198	0.180691
K01771	3.47e-05	2.64e-05	2.28e-05	2.98e-05	2.28e-05	2.57e-05	1.67e-05	2.72e-05	2.19e-05	1.4e-05	2.96e-05	2.84e-05	3.74e-05	2.43e-05	2.44e-05	2.52e-05	9.62e-06	2.37e-05	0.70047	0.787198	0.37104
K04568	1.98e-05	4.3e-05	2.28e-05	2.98e-05	2.73e-05	1.28e-05	5.67e-05	1.63e-05	4.74e-05	2.81e-05	2.96e-05	3.97e-05	9.34e-06	3.64e-05	8.15e-06	3.78e-05	2.88e-05	3.55e-05	0.700298	0.787198	0.22357
K19174	9.92e-06	1.32e-05	9.1e-06	1.28e-05	9.1e-06	1.28e-05	1.33e-05	1.09e-05	7.3e-06	9.37e-06	0	1.7e-05	1.4e-05	1.82e-05	1.22e-05	1.89e-05	4.81e-06	1.18e-05	0.699713	0.786836	-0.248635
K15974	0	3.31e-06	4.55e-06	8.52e-06	4.55e-06	8.55e-06	3.34e-06	5.44e-06	0	0	4.93e-06	1.13e-05	0	6.07e-06	4.07e-06	1.26e-05	0	5.92e-06	0.69865	0.785821	-0.120622
K18284	0	6.61e-06	1.37e-05	1.28e-05	1.37e-05	4.28e-06	6.67e-06	1.63e-05	1.09e-05	9.37e-06	4.93e-06	0	4.67e-06	1.21e-05	1.22e-05	1.26e-05	1.92e-05	0	0.698403	0.785724	0.155893
K07451	0.000243007	0.00024794	0.000195693	0.000242774	0.000286736	0.000235257	0.000223523	0.000212141	0.000240807	0.000215402	0.000236647	0.000283625	0.000200871	0.000285371	0.000211809	0.0002206	0.000250031	0.000272317	0.698196	0.785671	-0.851137
K07650	3.97e-05	4.3e-05	3.64e-05	4.26e-05	4.1e-05	3.85e-05	2.34e-05	3.81e-05	2.55e-05	4.68e-05	1.48e-05	5.67e-05	4.67e-05	3.64e-05	2.44e-05	5.04e-05	2.88e-05	4.14e-05	0.697938	0.785561	-0.35826
K22349	2.98e-05	3.31e-06	1.82e-05	2.56e-05	2.28e-05	3.42e-05	3.34e-06	5.44e-06	0	0	0	1.13e-05	1.87e-05	1.21e-05	5.7e-05	1.26e-05	4.81e-06	0	0.697884	0.785561	0.0957311
K10004	4.96e-06	3.31e-06	4.55e-06	4.26e-06	4.55e-06	8.55e-06	6.67e-06	5.44e-06	3.65e-06	0	0	0	4.67e-06	1.82e-05	4.07e-06	2.52e-05	4.81e-06	0	0.697632	0.785561	-0.090517
K02667	0	0	9.1e-06	0	0	0	3.34e-06	0	3.65e-06	4.68e-06	0	5.67e-06	0	0	0	0	4.81e-06	5.92e-06	0.697579	0.785561	-0.0721766
K13010	9.92e-06	1.32e-05	2.28e-05	8.52e-06	4.55e-06	1.28e-05	1e-05	1.09e-05	1.09e-05	9.37e-06	4.93e-06	1.7e-05	9.34e-06	1.82e-05	1.22e-05	1.89e-05	4.81e-06	1.78e-05	0.696691	0.78488	-0.235178
K08724	4.96e-05	3.97e-05	5.01e-05	2.98e-05	5.01e-05	3.42e-05	3e-05	2.72e-05	4.38e-05	5.15e-05	3.94e-05	5.67e-05	4.67e-05	4.25e-05	2.04e-05	4.41e-05	2.4e-05	4.74e-05	0.696396	0.784728	-0.390334
K21977	0	9.92e-06	9.1e-06	4.26e-06	1.37e-05	4.28e-06	6.67e-06	0	3.65e-06	9.37e-06	4.93e-06	5.67e-06	4.67e-06	6.07e-06	0	6.3e-06	9.62e-06	1.18e-05	0.69551	0.78391	-0.157851
K07140	0	3.31e-06	0	0	0	0	0	0	0	0	0	0	0	6.07e-06	0	0	0	0	0.695024	0.783542	-0.0335159
K22310	0	3.31e-06	0	0	0	0	0	0	0	0	0	0	0	6.07e-06	0	0	0	0	0.695024	0.783542	-0.0335159
K00001	0.000193414	0.000128929	0.000113775	0.000102221	0.00013199	0.000162541	0.000123438	0.000141427	0.000142295	0.00014048	0.000103533	0.000141813	0.000135471	0.000133578	0.00017515	0.00013236	0.000158674	0.000159838	0.694516	0.783331	-0.610459
K09003	1.98e-05	1.32e-05	2.28e-05	1.7e-05	1.82e-05	1.28e-05	2.67e-05	1.63e-05	2.19e-05	2.81e-05	1.97e-05	1.7e-05	9.34e-06	3.64e-05	1.22e-05	3.15e-05	9.62e-06	1.78e-05	0.693786	0.782688	-0.268877
K21469	9.92e-06	3.31e-06	4.55e-06	0	0	8.55e-06	3.34e-06	5.44e-06	3.65e-06	4.68e-06	0	0	9.34e-06	0	2.04e-05	0	1.44e-05	0	0.69339	0.782421	-0.0868214
K14127	4.96e-06	1.32e-05	1.37e-05	4.26e-06	4.55e-06	4.28e-06	1.33e-05	1.09e-05	1.46e-05	9.37e-06	9.86e-06	1.13e-05	9.34e-06	1.21e-05	4.07e-06	1.26e-05	4.81e-06	1.78e-05	0.693144	0.782324	-0.233091
K00088	0.000719103	0.000687619	0.000664446	0.000711286	0.000678154	0.000714325	0.000637206	0.00077785	0.000671342	0.00068835	0.000675429	0.00065801	0.000752097	0.000667889	0.000786138	0.000649195	0.00081741	0.000657112	0.692932	0.782266	-1.39737
K06994	9.92e-06	1.32e-05	9.1e-06	8.52e-06	9.1e-06	8.55e-06	1.33e-05	2.72e-05	1.46e-05	9.37e-06	1.48e-05	1.7e-05	9.34e-06	2.43e-05	8.15e-06	1.89e-05	9.62e-06	1.18e-05	0.691863	0.781238	-0.243718
K22306	9.92e-06	3.31e-06	9.1e-06	4.26e-06	4.55e-06	0	1e-05	5.44e-06	1.09e-05	4.68e-06	4.93e-06	1.13e-05	4.67e-06	6.07e-06	4.07e-06	6.3e-06	4.81e-06	1.78e-05	0.690811	0.78023	-0.173338
K11738	9.92e-06	0	0	0	0	4.28e-06	0	0	7.3e-06	4.68e-06	0	5.67e-06	0	0	0	6.3e-06	4.81e-06	5.92e-06	0.690775	0.78023	-0.0843936
K07696	0	3.31e-06	4.55e-06	0	0	0	0	0	0	0	4.93e-06	0	0	0	0	0	0	0	0.690448	0.780181	0.044414
K13927	3.97e-05	6.28e-05	5.46e-05	7.67e-05	2.73e-05	4.28e-05	7.01e-05	4.35e-05	7.66e-05	7.49e-05	6.41e-05	5.67e-05	6.07e-05	3.64e-05	4.48e-05	4.41e-05	5.77e-05	8.29e-05	0.690337	0.780181	-0.366995
K09744	0	0	9.1e-06	0	0	0	3.34e-06	0	3.65e-06	4.68e-06	0	5.67e-06	0	6.07e-06	0	0	4.81e-06	0	0.690127	0.780179	-0.0740355
K07105	0.000247967	0.000297528	0.000286713	0.000315181	0.00023212	0.00029514	0.000270229	0.000261097	0.000288239	0.000285642	0.000226786	0.000209883	0.000350356	0.000151793	0.000395106	0.00017648	0.000326964	0.000266397	0.690067	0.780179	0.475323
K11895	4.96e-06	6.61e-06	9.1e-06	4.26e-06	0	8.55e-06	0	0	0	4.68e-06	0	0	0	6.07e-06	4.07e-06	0	0	1.18e-05	0.690036	0.780179	0.0893884
K20511	0	3.31e-06	0	4.26e-06	4.55e-06	4.28e-06	3.34e-06	0	3.65e-06	0	4.93e-06	5.67e-06	0	6.07e-06	0	6.3e-06	4.81e-06	0	0.687653	0.77792	-0.120855
K02967	0.00100179	0.00105457	0.00105583	0.00105202	0.00104681	0.00101374	0.000994175	0.000962794	0.00107634	0.00105828	0.00104519	0.000992688	0.0010137	0.00103219	0.000936848	0.00108409	0.000952042	0.00106559	0.687521	0.77792	2.47047
K16013	0	0	0	0	0	8.55e-06	6.67e-06	1.09e-05	7.3e-06	0	0	5.67e-06	4.67e-06	6.07e-06	4.07e-06	6.3e-06	0	0	0.687132	0.777691	0.0943324
K03073	0.000659591	0.000591749	0.000632589	0.000651657	0.000591678	0.000615945	0.000660559	0.000620104	0.000653099	0.000632159	0.000621198	0.000572923	0.000696041	0.000613244	0.000712819	0.000605075	0.000653928	0.000633432	0.687063	0.777691	-1.86153
K02806	0.000114065	8.6e-05	0.000122877	5.96e-05	7.28e-05	5.99e-05	0.000126774	7.62e-05	0.000120404	6.56e-05	0.000108463	7.94e-05	6.07e-05	0.00013965	4.07e-05	0.000151269	5.77e-05	7.7e-05	0.687055	0.777691	0.289916
K00132	0	3.31e-06	4.55e-06	4.26e-06	0	0	0	0	0	9.37e-06	0	0	0	0	8.15e-06	0	0	0	0.686673	0.777691	-0.057287
K00528	0.000738941	0.000753736	0.00068265	0.000707027	0.000700911	0.000718603	0.000690585	0.000734334	0.000711476	0.000711764	0.00070501	0.000646665	0.000724069	0.000722535	0.000737259	0.000611378	0.000841451	0.000651192	0.686663	0.777691	1.53545
K02040	0.000867883	0.000800019	0.000814629	0.000787952	0.000842004	0.000893976	0.000810686	0.00089752	0.000722422	0.000913118	0.000823333	0.000765788	0.00089224	0.000765037	0.000900189	0.000800464	0.000884726	0.00079327	0.686522	0.777691	-1.54791
K05367	3.97e-05	3.64e-05	5.46e-05	3.41e-05	4.55e-05	2.14e-05	5.34e-05	4.9e-05	3.28e-05	4.21e-05	3.45e-05	4.54e-05	3.27e-05	5.46e-05	3.26e-05	5.04e-05	3.85e-05	5.33e-05	0.686085	0.777585	-0.457501
K16203	4.96e-05	0.000119011	8.19e-05	0.000140554	6.37e-05	4.71e-05	0.000100085	8.16e-05	0.000116755	9.37e-05	9.86e-05	8.51e-05	7.94e-05	0.000109291	6.52e-05	0.000100846	0.000105782	0.000106559	0.685906	0.777561	-0.39062
K16153	9.92e-06	1.65e-05	9.1e-06	1.7e-05	1.82e-05	1.71e-05	1e-05	5.44e-06	1.09e-05	1.4e-05	9.86e-06	1.13e-05	2.34e-05	6.07e-06	2.04e-05	6.3e-06	1.44e-05	1.78e-05	0.68469	0.776363	-0.268287
K03324	0.0010117	0.00101159	0.00105128	0.0010861	0.00106502	0.00100519	0.00100752	0.0011423	0.0010362	0.00103018	0.000917006	0.000930291	0.0011772	0.000959332	0.00120568	0.000876098	0.00122131	0.000917589	0.682363	0.773903	1.09945
K03230	4.96e-06	9.92e-06	4.55e-06	8.52e-06	9.1e-06	0	6.67e-06	1.09e-05	3.65e-06	4.68e-06	9.86e-06	5.67e-06	4.67e-06	1.21e-05	4.07e-06	1.26e-05	4.81e-06	5.92e-06	0.682296	0.773903	-0.215708
K20974	4.96e-06	0	0	1.28e-05	4.55e-06	1.71e-05	3.34e-06	5.44e-06	7.3e-06	4.68e-06	4.93e-06	1.13e-05	9.34e-06	6.07e-06	0	0	4.81e-06	5.92e-06	0.682025	0.773879	0.130788
K02586	3.97e-05	1.32e-05	2.73e-05	3.83e-05	6.37e-05	2.99e-05	4e-05	2.72e-05	1.82e-05	1.87e-05	2.47e-05	4.54e-05	2.34e-05	3.64e-05	6.52e-05	5.04e-05	1.92e-05	4.14e-05	0.681711	0.773702	-0.245899
K20492	4.96e-06	6.61e-06	1.37e-05	1.28e-05	9.1e-06	1.28e-05	6.67e-06	2.72e-05	7.3e-06	9.37e-06	4.93e-06	1.7e-05	1.87e-05	1.21e-05	8.15e-06	1.26e-05	2.4e-05	5.92e-06	0.681464	0.773601	-0.198737
K22319	4.96e-06	9.92e-06	0	4.26e-06	4.55e-06	0	3.34e-06	5.44e-06	0	0	9.86e-06	5.67e-06	4.67e-06	6.07e-06	0	6.3e-06	0	5.92e-06	0.680887	0.773125	-0.127849
K02996	0.00117536	0.00124631	0.00116506	0.00120535	0.00125163	0.00126611	0.00121102	0.00109878	0.00126971	0.00125027	0.00121774	0.00124228	0.00117252	0.00114148	0.00108756	0.0013236	0.00121169	0.00137342	0.680285	0.772621	-1.81798
K15770	0.000243007	0.000264469	0.000300366	0.000302403	0.000318596	0.000273753	0.000306927	0.000250218	0.000277293	0.000234133	0.000285948	0.000283625	0.000312985	0.000200367	0.00036252	0.000182783	0.000346197	0.000242717	0.678738	0.771043	0.639887
K15372	9.92e-06	9.92e-06	1.37e-05	3.83e-05	3.64e-05	2.99e-05	2e-05	2.18e-05	2.19e-05	1.87e-05	1.48e-05	1.13e-05	3.27e-05	3.04e-05	2.44e-05	2.52e-05	9.62e-06	1.78e-05	0.67862	0.771043	0.25165
K07287	4.96e-06	3.31e-06	9.1e-06	4.26e-06	4.55e-06	4.28e-06	3.34e-06	1.09e-05	3.65e-06	0	4.93e-06	0	9.34e-06	6.07e-06	4.07e-06	1.26e-05	4.81e-06	0	0.67776	0.770289	0.15288
K20530	1.98e-05	1.65e-05	4.55e-05	1.7e-05	2.28e-05	2.99e-05	2.34e-05	2.72e-05	1.82e-05	1.87e-05	2.96e-05	2.27e-05	9.34e-06	4.25e-05	1.63e-05	3.15e-05	1.44e-05	1.78e-05	0.677358	0.770011	0.269019
K03809	9.92e-06	1.65e-05	2.28e-05	8.52e-06	9.1e-06	1.28e-05	3e-05	3.26e-05	2.92e-05	2.34e-05	1.97e-05	2.27e-05	9.34e-06	2.43e-05	8.15e-06	4.41e-05	1.44e-05	2.37e-05	0.67732	0.770011	-0.218574
K02939	0.00128943	0.00133226	0.00124242	0.00129054	0.00130624	0.00129177	0.00122437	0.00113686	0.00126241	0.00128305	0.0012917	0.00118555	0.00132668	0.00129935	0.00113236	0.00124797	0.0012165	0.00128462	0.677107	0.770011	2.31987
K18866	5.46e-05	6.61e-05	5.46e-05	5.11e-05	5.92e-05	5.56e-05	7.34e-05	9.25e-05	6.2e-05	6.09e-05	8.87e-05	6.81e-05	5.61e-05	5.46e-05	4.07e-05	7.56e-05	7.21e-05	7.7e-05	0.67661	0.769697	-0.525181
K01303	4.96e-06	9.92e-06	0	4.26e-06	0	4.28e-06	6.67e-06	5.44e-06	1.09e-05	4.68e-06	0	0	1.4e-05	6.07e-06	4.07e-06	0	9.62e-06	0	0.675695	0.768835	0.119195
K08969	4.96e-06	0	0	0	4.55e-06	0	3.34e-06	0	3.65e-06	4.68e-06	0	5.67e-06	0	0	0	0	4.81e-06	5.92e-06	0.67526	0.768519	-0.0923356
K06901	0.000466177	0.000542161	0.000473304	0.000459993	0.000473343	0.00042774	0.000483743	0.000505875	0.000503506	0.00052914	0.000404271	0.000538888	0.000579255	0.000382518	0.000598768	0.000365566	0.000524104	0.000532793	0.674589	0.767934	-0.831739
K20276	0.000109105	4.63e-05	5.92e-05	5.54e-05	6.37e-05	4.28e-05	6.01e-05	5.98e-05	5.84e-05	4.68e-05	7.89e-05	4.54e-05	3.74e-05	9.11e-05	4.48e-05	7.56e-05	5.29e-05	4.74e-05	0.674206	0.767676	0.353033
K00554	0.00114065	0.00115375	0.00110589	0.00106054	0.00111964	0.0010779	0.00106757	0.00101719	0.00113471	0.0011332	0.00118323	0.0010721	0.00117252	0.00109898	0.00101831	0.0010904	0.0010434	0.00116031	0.673344	0.766873	-2.39027
K14118	0	6.61e-06	4.55e-06	0	0	0	6.67e-06	0	3.65e-06	4.68e-06	0	5.67e-06	0	0	0	0	0	5.92e-06	0.673087	0.766758	0.0826931
K14188	4.96e-06	1.98e-05	9.1e-06	2.13e-05	9.1e-06	2.14e-05	1e-05	1.63e-05	1.46e-05	1.87e-05	9.86e-06	2.27e-05	9.34e-06	1.82e-05	1.22e-05	2.52e-05	9.62e-06	1.18e-05	0.672138	0.765855	-0.27428
K10679	4.96e-06	3.31e-06	4.55e-06	4.26e-06	0	4.28e-06	0	0	0	4.68e-06	4.93e-06	5.67e-06	0	0	0	0	4.81e-06	5.92e-06	0.672123	0.765855	-0.116988
K02313	0.00104146	0.00105126	0.00105128	0.00107758	0.00110598	0.00106507	0.00102754	0.000989991	0.00101066	0.00109574	0.00103533	0.0010324	0.00105574	0.00098969	0.000989801	0.00102106	0.00102417	0.00110703	0.672039	0.765855	3.08687
K00282	0.000183495	0.000178517	0.000154734	0.000132035	0.000141093	0.000132599	0.000190161	0.000184943	0.000171484	0.000177941	0.000187345	0.00015883	0.000168171	0.000194295	0.000118124	0.000170177	0.000158674	0.000177598	0.668987	0.762798	-0.829567
K16238	4.96e-06	6.61e-06	9.1e-06	0	0	4.28e-06	3.34e-06	0	3.65e-06	0	0	1.13e-05	9.34e-06	0	4.07e-06	0	0	0	0.668515	0.762438	0.0920857
K02986	0.00122496	0.00120995	0.00116051	0.00117128	0.00119246	0.00116345	0.00116098	0.00109878	0.00115661	0.00116598	0.00119802	0.0011345	0.00119588	0.00119613	0.00102646	0.00122276	0.00106263	0.00123135	0.668176	0.762229	2.34685
K03819	0	0	0	0	0	4.28e-06	0	0	3.65e-06	0	0	0	0	0	0	0	4.81e-06	0	0.66764	0.761795	0.0482577
K05362	0	6.61e-06	4.55e-06	0	4.55e-06	8.55e-06	0	0	0	0	4.93e-06	5.67e-06	9.34e-06	0	0	0	4.81e-06	5.92e-06	0.667065	0.761316	-0.101646
K10775	4.96e-06	3.31e-06	4.55e-06	4.26e-06	9.1e-06	4.28e-06	1.33e-05	5.44e-06	7.3e-06	4.68e-06	9.86e-06	0	4.67e-06	1.82e-05	4.07e-06	1.26e-05	4.81e-06	5.92e-06	0.66706	0.761316	-0.173161
K06139	0	1.98e-05	4.55e-06	8.52e-06	0	4.28e-06	1e-05	5.44e-06	1.09e-05	4.68e-06	0	1.13e-05	9.34e-06	6.07e-06	4.07e-06	6.3e-06	0	1.18e-05	0.666463	0.760984	0.140353
K04567	0.000937314	0.000866136	0.000778221	0.000817766	0.000914826	0.00085548	0.000857393	0.000766971	0.000842826	0.000847561	0.000843054	0.000850876	0.000878226	0.000874328	0.00086353	0.000819372	0.000851068	0.000887989	0.666405	0.760984	-2.31278
K11777	2.98e-05	2.64e-05	1.82e-05	4.26e-06	1.37e-05	3.42e-05	1.67e-05	3.26e-05	2.55e-05	3.28e-05	2.96e-05	5.67e-06	2.8e-05	6.07e-06	3.67e-05	1.26e-05	7.69e-05	5.92e-06	0.664895	0.759547	-0.15923
K03667	0.000203333	0.000251245	0.00018204	0.000191664	0.000177503	0.000132599	0.000236867	0.000141427	0.000226213	0.00021072	0.000266228	0.000232573	0.000163499	0.00021251	0.000109978	0.000245812	0.000120207	0.000278237	0.664628	0.759419	-0.445499
K03589	0.000674469	0.000664478	0.000655344	0.000647398	0.000646295	0.000697216	0.000620525	0.000652742	0.000587424	0.000641524	0.000631058	0.000606958	0.000696041	0.000613244	0.00068838	0.000617681	0.000682778	0.000603833	0.664125	0.759022	2.18202
K03565	0.000937314	0.000938865	0.000832833	0.000864617	0.000901172	0.000859757	0.000904099	0.000832245	0.000886609	0.000931849	0.000936727	0.000941636	0.000882897	0.000850041	0.000896116	0.000869795	0.000855876	0.000864309	0.663612	0.758612	-2.70181
K11695	0	3.31e-06	0	0	0	0	0	0	3.65e-06	4.68e-06	0	0	0	6.07e-06	0	0	0	0	0.663074	0.758175	-0.0568425
K02241	3.47e-05	4.96e-05	3.64e-05	5.54e-05	3.64e-05	5.99e-05	4.67e-05	6.53e-05	3.28e-05	2.34e-05	4.44e-05	5.11e-05	4.2e-05	6.07e-05	3.26e-05	6.93e-05	1.92e-05	4.74e-05	0.662597	0.757807	0.363465
K13678	9.92e-06	9.92e-06	9.1e-06	2.13e-05	2.73e-05	1.71e-05	1e-05	2.18e-05	1.09e-05	9.37e-06	9.86e-06	1.13e-05	1.4e-05	1.82e-05	1.22e-05	2.52e-05	1.92e-05	5.92e-06	0.661701	0.756959	0.266495
K14090	9.92e-06	1.98e-05	2.28e-05	2.13e-05	2.73e-05	1.71e-05	2.67e-05	3.26e-05	3.28e-05	2.34e-05	2.47e-05	2.27e-05	2.8e-05	1.82e-05	3.26e-05	1.89e-05	1.92e-05	3.55e-05	0.66127	0.756643	-0.414097
K00989	0.000188455	0.000175211	0.000213897	0.000187405	0.000145644	0.000158264	0.000206842	0.000146867	0.00020797	0.000163893	0.000162695	0.00018152	0.000140142	0.00021251	0.000101831	0.000233206	0.000149057	0.000219037	0.661253	0.756643	0.589602
K07478	0.00102162	0.0010149	0.000978465	0.000996652	0.00104681	0.000979524	0.000997511	0.000870322	0.00104715	0.000997406	0.00102547	0.000958653	0.00103705	0.000971475	0.00100202	0.00101476	0.000961659	0.00107151	0.661087	0.756643	-2.54604
K09903	0.00106626	0.00105457	0.00106493	0.000988134	0.00100585	0.0010608	0.000977494	0.00102807	0.00106904	0.00102082	0.00112407	0.00106076	0.00106508	0.000983619	0.00102646	0.000964338	0.0010434	0.00111295	0.66103	0.756643	-2.67071
K01902	4.96e-05	4.96e-05	9.1e-05	3.83e-05	3.64e-05	4.71e-05	5e-05	3.26e-05	7.66e-05	4.21e-05	5.42e-05	6.24e-05	3.27e-05	6.07e-05	1.63e-05	7.56e-05	3.85e-05	5.33e-05	0.659625	0.755466	0.318475
K19428	0	9.92e-06	0	4.26e-06	4.55e-06	4.28e-06	3.34e-06	1.09e-05	7.3e-06	4.68e-06	4.93e-06	5.67e-06	0	6.07e-06	0	6.3e-06	4.81e-06	5.92e-06	0.659322	0.755296	0.167385
K05569	0.000123983	0.000115705	0.000113775	0.000140554	9.1e-05	0.000124045	0.000133446	0.000119669	0.000149592	0.000103018	0.000142974	0.00015883	0.000154157	0.000121434	0.000134417	0.00013236	9.62e-05	0.000106559	0.657635	0.75354	-0.745497
K00962	0.000788534	0.000786795	0.000737262	0.000804988	0.000901172	0.000791319	0.000747299	0.000750653	0.000744314	0.000870974	0.000783892	0.000788478	0.000770783	0.000783252	0.000753552	0.000712224	0.000740477	0.000757751	0.65691	0.752886	1.94773
K07455	0.00014878	0.00015207	0.000150183	0.000140554	0.000163849	0.000179651	0.000140119	0.000179504	0.000149592	0.00021072	0.000167625	0.000124795	0.000140142	0.000170008	0.000122198	0.000182783	0.000129824	0.000207197	0.656195	0.752242	-0.712085
K09691	0.000168617	0.000175211	0.000145632	0.000195923	0.000177503	0.000171096	0.000200169	0.000201262	0.000164187	0.000149845	0.000157764	0.00015883	0.000135471	0.000188223	0.00018737	0.000201692	0.000216373	0.000159838	0.656033	0.752233	0.907368
K19449	1.98e-05	6.61e-06	2.73e-05	1.28e-05	1.37e-05	8.55e-06	0	0	0	1.4e-05	4.93e-06	5.67e-06	1.4e-05	1.21e-05	1.22e-05	1.26e-05	9.62e-06	1.78e-05	0.656017	0.752233	-0.172069
K01679	0.000168617	0.000185128	0.000245754	0.000221478	0.000195709	0.000153986	0.000203506	0.000206701	0.000189727	0.000266911	0.000187345	0.0002269	0.000149485	0.000200367	0.000171077	0.000182783	0.00025484	0.000195358	0.655767	0.752233	-0.712123
K13745	9.92e-06	1.32e-05	9.1e-06	8.52e-06	9.1e-06	1.28e-05	1.33e-05	2.18e-05	1.82e-05	1.4e-05	9.86e-06	1.13e-05	9.34e-06	1.21e-05	8.15e-06	1.26e-05	1.92e-05	1.18e-05	0.655454	0.752097	0.376936
K14087	0	0	9.1e-06	8.52e-06	1.37e-05	8.55e-06	1e-05	1.09e-05	1.82e-05	9.37e-06	0	0	1.87e-05	0	1.22e-05	0	1.92e-05	5.92e-06	0.654497	0.751176	0.136397
K08986	4.96e-06	0	4.55e-06	4.26e-06	1.37e-05	4.28e-06	3.34e-06	0	0	4.68e-06	4.93e-06	0	4.67e-06	6.07e-06	4.07e-06	6.3e-06	4.81e-06	5.92e-06	0.653855	0.750614	-0.155026
K02929	4.96e-06	1.32e-05	1.82e-05	4.26e-06	9.1e-06	8.55e-06	1.33e-05	1.09e-05	1.09e-05	9.37e-06	9.86e-06	1.7e-05	4.67e-06	2.43e-05	4.07e-06	1.89e-05	4.81e-06	1.18e-05	0.653375	0.750239	-0.224368
K00783	0.00123983	0.00117358	0.0011423	0.00109461	0.0011606	0.00114207	0.00117099	0.00109878	0.0011712	0.00117066	0.00121774	0.00112316	0.00123792	0.00117184	0.00112014	0.0011093	0.00111552	0.00121951	0.652862	0.749826	-2.94644
K01358	0.00154731	0.00155375	0.00141536	0.00156738	0.00162029	0.00149709	0.00151795	0.00144691	0.00157255	0.0015921	0.00171569	0.00157128	0.00152288	0.00153615	0.00135232	0.0015316	0.00144249	0.00164574	0.651953	0.748958	-2.09927
K18345	0	0	9.1e-06	8.52e-06	9.1e-06	8.55e-06	0	0	7.3e-06	0	0	5.67e-06	0	1.21e-05	4.07e-06	6.3e-06	0	5.92e-06	0.651698	0.748841	0.117538
K12111	1.49e-05	6.61e-06	4.55e-06	8.52e-06	4.55e-06	4.28e-06	1e-05	5.44e-06	7.3e-06	1.4e-05	4.93e-06	0	1.87e-05	0	8.15e-06	0	9.62e-06	0	0.650765	0.747944	0.148432
K03228	4.96e-06	9.92e-06	4.55e-06	8.52e-06	9.1e-06	0	1e-05	5.44e-06	3.65e-06	4.68e-06	1.48e-05	5.67e-06	4.67e-06	6.07e-06	4.07e-06	1.26e-05	4.81e-06	5.92e-06	0.64963	0.746815	-0.220795
K03780	7.44e-05	5.95e-05	4.1e-05	8.09e-05	6.83e-05	6.84e-05	4.67e-05	7.62e-05	5.84e-05	4.21e-05	4.44e-05	6.24e-05	8.88e-05	2.43e-05	8.96e-05	4.41e-05	8.17e-05	5.92e-05	0.64944	0.746772	0.395021
K06045	1.49e-05	1.65e-05	2.73e-05	1.28e-05	1.37e-05	8.55e-06	1.67e-05	2.18e-05	2.19e-05	9.37e-06	1.97e-05	2.27e-05	1.4e-05	2.43e-05	8.15e-06	1.26e-05	1.44e-05	1.78e-05	0.649066	0.746518	0.354142
K10037	0	0	4.55e-06	4.26e-06	0	0	0	5.44e-06	0	0	0	5.67e-06	0	0	4.07e-06	0	0	0	0.649046	0.746518	0.0705627
K16213	7.93e-05	8.93e-05	7.28e-05	0.00010648	0.000113784	0.000128322	9.34e-05	0.000130548	0.000109458	9.83e-05	9.86e-05	0.00013614	9.34e-05	0.000103219	9.78e-05	0.000107149	0.000129824	9.47e-05	0.64885	0.746518	-0.699557
K19123	2.98e-05	2.64e-05	1.37e-05	2.13e-05	4.55e-05	2.14e-05	2e-05	2.72e-05	2.55e-05	2.81e-05	2.47e-05	3.97e-05	4.67e-06	1.21e-05	2.04e-05	1.89e-05	3.85e-05	2.37e-05	0.648389	0.746265	0.293609
K01006	0.000704225	0.000677702	0.00068265	0.000643139	0.000705463	0.000650164	0.000640542	0.000641862	0.000671342	0.000655572	0.00069022	0.000686373	0.000686698	0.000667889	0.000635428	0.000655498	0.000663544	0.000728151	0.648099	0.746106	-3.08422
K01455	4.96e-06	0	4.55e-06	0	0	4.28e-06	3.34e-06	0	3.65e-06	4.68e-06	0	0	4.67e-06	6.07e-06	4.07e-06	6.3e-06	0	0	0.647952	0.746106	-0.124127
K22167	4.96e-06	6.61e-06	4.55e-06	4.26e-06	4.55e-06	4.28e-06	6.67e-06	1.09e-05	3.65e-06	4.68e-06	4.93e-06	5.67e-06	4.67e-06	6.07e-06	4.07e-06	6.3e-06	4.81e-06	5.92e-06	0.6479	0.746106	0.393673
K07261	4.96e-06	3.31e-06	9.1e-06	0	0	4.28e-06	0	5.44e-06	0	4.68e-06	0	5.67e-06	0	0	0	0	4.81e-06	5.92e-06	0.647217	0.745618	0.107506
K18446	9.92e-06	9.92e-06	1.37e-05	8.52e-06	0	8.55e-06	1.33e-05	5.44e-06	1.82e-05	1.4e-05	0	5.67e-06	9.34e-06	0	2.44e-05	0	1.92e-05	0	0.646814	0.745329	0.144142
K05781	0	9.92e-06	4.55e-06	4.26e-06	0	4.28e-06	3.34e-06	5.44e-06	3.65e-06	0	0	1.13e-05	4.67e-06	6.07e-06	8.15e-06	6.3e-06	0	5.92e-06	0.646584	0.745238	-0.150389
K05364	0.000193414	0.000168599	0.000131979	0.000225737	0.000191158	0.00019676	0.000210178	0.000195822	0.000193376	0.00014048	0.000172555	0.000209883	0.000186857	0.000206438	0.000248468	0.000170177	0.000211565	0.000219037	0.645654	0.744342	-0.804594
K00604	0.00128447	0.00115375	0.00119236	0.00114146	0.00114239	0.00118484	0.00116098	0.00107702	0.00118579	0.00118471	0.00120295	0.00120824	0.00116785	0.00123863	0.00109978	0.00116603	0.00105302	0.00108335	0.644675	0.743388	2.40518
K06887	0	0	0	0	0	0	6.67e-06	0	3.65e-06	0	0	0	0	0	0	0	0	5.92e-06	0.643055	0.741695	0.0507607
K16793	0	3.31e-06	4.55e-06	0	0	0	0	0	3.65e-06	0	0	5.67e-06	4.67e-06	0	0	0	0	5.92e-06	0.643055	0.741695	-0.0804038
K09964	0	9.92e-06	1.37e-05	8.52e-06	9.1e-06	8.55e-06	6.67e-06	1.09e-05	7.3e-06	0	1.97e-05	5.67e-06	0	1.82e-05	0	1.26e-05	0	5.92e-06	0.642867	0.741695	0.149787
K04073	0	0	0	0	0	0	3.34e-06	0	3.65e-06	0	0	0	0	0	4.07e-06	0	0	0	0.642102	0.741119	0.052389
K10978	0	3.31e-06	0	0	0	0	6.67e-06	0	7.3e-06	0	0	5.67e-06	0	0	0	0	0	5.92e-06	0.641564	0.740674	0.0704035
K03787	0.000441381	0.000436374	0.000505161	0.000506845	0.000486997	0.000440572	0.00050376	0.000429721	0.000470669	0.000416756	0.000502874	0.000425438	0.000415756	0.000540383	0.000374739	0.000523138	0.000437555	0.000491354	0.641539	0.740674	1.23946
K09516	5.95e-05	2.64e-05	5.92e-05	2.13e-05	3.64e-05	4.71e-05	3.67e-05	4.9e-05	2.92e-05	2.81e-05	5.42e-05	2.84e-05	3.74e-05	4.86e-05	4.07e-05	5.67e-05	1.92e-05	2.37e-05	0.64042	0.739702	0.352682
K02906	0.0011952	0.00114383	0.0011241	0.00119257	0.00121977	0.00118484	0.00115431	0.00110422	0.00113471	0.00115193	0.00117337	0.00109479	0.0011772	0.00112327	0.00109163	0.00121015	0.00112514	0.00121951	0.639953	0.739336	3.36974
K03626	4.96e-06	9.92e-06	4.55e-06	4.26e-06	4.55e-06	4.28e-06	1.33e-05	1.09e-05	1.09e-05	4.68e-06	9.86e-06	1.13e-05	0	1.21e-05	4.07e-06	1.26e-05	4.81e-06	1.78e-05	0.636666	0.735713	-0.215516
K06338	0	0	4.55e-06	0	4.55e-06	4.28e-06	3.34e-06	5.44e-06	3.65e-06	0	4.93e-06	5.67e-06	0	1.82e-05	0	6.3e-06	0	0	0.636366	0.73554	-0.0938212
K07719	1.49e-05	3.31e-05	2.28e-05	3.83e-05	3.19e-05	2.57e-05	2.34e-05	1.63e-05	2.55e-05	3.28e-05	2.47e-05	1.7e-05	4.2e-05	1.21e-05	3.26e-05	1.26e-05	4.33e-05	3.55e-05	0.634644	0.733723	-0.338333
K00385	0	1.65e-05	0	4.26e-06	9.1e-06	0	6.67e-06	5.44e-06	7.3e-06	4.68e-06	0	0	4.67e-06	0	8.15e-06	0	9.62e-06	1.18e-05	0.634109	0.733277	0.123556
K11068	0.000634795	0.000664478	0.000605283	0.000630361	0.000618987	0.000705771	0.000647215	0.000592907	0.000631207	0.000660255	0.000660639	0.000595613	0.000616626	0.000552526	0.000712819	0.000560955	0.000702011	0.000568313	0.633654	0.732924	1.63142
K03698	0.000411625	0.000366951	0.000359529	0.000417401	0.000373212	0.000419185	0.000403675	0.000484117	0.00041594	0.000365247	0.000404271	0.000442455	0.000383056	0.000473594	0.000452131	0.000403383	0.000418322	0.000384795	0.633629	0.732924	-1.41894
K00402	4.96e-06	6.61e-06	9.1e-06	4.26e-06	4.55e-06	4.28e-06	1.33e-05	1.09e-05	1.46e-05	4.68e-06	9.86e-06	1.7e-05	4.67e-06	1.21e-05	4.07e-06	1.26e-05	4.81e-06	1.18e-05	0.633366	0.732924	-0.248615
K08303	0.00184487	0.00190087	0.00174303	0.00185275	0.00187972	0.00176657	0.00175148	0.00164817	0.00176957	0.00177941	0.00185373	0.00176982	0.00185922	0.00175473	0.00166596	0.00170808	0.00175983	0.00185294	0.63297	0.732653	3.0622
K18672	0.000679429	0.000700843	0.000668997	0.000736841	0.000750976	0.000778486	0.000690585	0.000636423	0.000638504	0.000721129	0.00070501	0.000652338	0.000747426	0.000649674	0.000659867	0.000598772	0.000740477	0.000704471	0.632256	0.731999	1.79206
K06148	0.000163658	0.000155375	0.000122877	0.000110739	0.000109233	0.000124045	0.000100085	0.000163185	8.76e-05	0.000121749	7.89e-05	9.08e-05	0.000219556	8.5e-05	0.000248468	9.45e-05	0.000187523	0.000112479	0.632216	0.731999	-0.340905
K06219	0	0	4.55e-06	0	0	0	0	0	3.65e-06	4.68e-06	0	0	0	0	0	0	0	0	0.631343	0.731289	0.0539221
K09158	1.49e-05	9.92e-06	1.37e-05	1.28e-05	9.1e-06	8.55e-06	1.33e-05	1.63e-05	7.3e-06	9.37e-06	4.93e-06	5.67e-06	3.27e-05	6.07e-06	8.15e-06	1.89e-05	4.81e-06	0	0.630827	0.730864	0.190175
K02834	0.00121008	0.00128598	0.00116051	0.00127776	0.00121977	0.00124472	0.00123104	0.00109334	0.00121133	0.00124559	0.00133114	0.00118555	0.00124727	0.0012447	0.00110385	0.00127318	0.00118284	0.0012491	0.630666	0.73085	-2.52887
K01940	0.000510811	0.000528938	0.000509712	0.000592028	0.000600781	0.000547507	0.000550466	0.000636423	0.000518101	0.000533823	0.000488084	0.000550233	0.000523198	0.000570742	0.000615061	0.000554652	0.000610653	0.000443995	0.630549	0.73085	1.40279
K10977	0	6.61e-06	0	0	0	0	1e-05	0	3.65e-06	4.68e-06	0	5.67e-06	4.67e-06	0	0	6.3e-06	0	5.92e-06	0.630018	0.730444	-0.101059
K02881	0.00133902	0.00126945	0.00124697	0.00128628	0.00132445	0.00133027	0.00125773	0.00120213	0.00129525	0.00132051	0.0013903	0.00129333	0.00124727	0.00123863	0.00111607	0.00119754	0.00120688	0.00139118	0.62951	0.730028	2.28154
K02444	4.96e-05	4.3e-05	5.92e-05	4.69e-05	4.55e-05	3.85e-05	1.67e-05	3.81e-05	3.65e-05	4.68e-05	3.45e-05	5.11e-05	4.2e-05	1.21e-05	4.07e-05	1.89e-05	7.21e-05	2.37e-05	0.628978	0.729585	0.333197
K09961	1.98e-05	3.31e-05	3.64e-05	3.41e-05	4.1e-05	4.28e-05	3e-05	3.26e-05	2.19e-05	4.21e-05	2.96e-05	2.27e-05	6.54e-05	4.25e-05	8.15e-06	6.93e-05	3.37e-05	1.18e-05	0.628571	0.729286	-0.27538
K21514	1.98e-05	1.65e-05	1.37e-05	2.13e-05	9.1e-06	1.71e-05	1.33e-05	1.09e-05	1.46e-05	1.87e-05	1.97e-05	2.27e-05	9.34e-06	1.82e-05	4.07e-06	1.89e-05	4.81e-06	3.55e-05	0.628241	0.729076	-0.276851
K09728	4.96e-06	9.92e-06	4.55e-06	4.26e-06	4.55e-06	4.28e-06	1.67e-05	1.09e-05	3.65e-06	4.68e-06	4.93e-06	2.27e-05	4.67e-06	6.07e-06	4.07e-06	6.3e-06	9.62e-06	1.18e-05	0.627846	0.728789	-0.188296
K20488	3.97e-05	4.96e-05	6.37e-05	5.54e-05	5.01e-05	7.7e-05	5e-05	4.9e-05	4.38e-05	4.21e-05	5.42e-05	5.67e-05	6.54e-05	5.46e-05	7.74e-05	4.41e-05	6.73e-05	4.14e-05	0.625872	0.72667	-0.599546
K02867	0.00130926	0.00119342	0.00121512	0.00123517	0.00124252	0.00118484	0.00123104	0.0011151	0.00120404	0.00121749	0.00131142	0.00116854	0.00118654	0.00118399	0.00106312	0.00124797	0.00111072	0.00129646	0.62438	0.72511	2.3092
K09690	0.000233089	0.000257857	0.000204795	0.000285366	0.000291288	0.000299418	0.000236867	0.000310052	0.000251753	0.000187306	0.000241577	0.000266608	0.000275613	0.000267156	0.000293274	0.000277326	0.000259648	0.000230877	0.624057	0.724907	1.00945
K01776	0.000942273	0.000975229	0.000973914	0.000932764	0.00092848	0.000932473	0.000944133	0.000875762	0.000915798	0.000978675	0.000961377	0.000969998	0.000962311	0.000898614	0.00100202	0.000844584	0.000952042	0.000935348	0.62374	0.724711	-3.0972
K01515	0.00081829	0.000846301	0.000841935	0.000958319	0.000914826	0.000941028	0.000840712	0.000859443	0.000846474	0.000880339	0.000818403	0.000901928	0.000840854	0.00077718	0.000944995	0.000750041	0.000995317	0.00081695	0.623446	0.724541	1.70177
K13281	0	6.61e-06	4.55e-06	8.52e-06	4.55e-06	0	1e-05	5.44e-06	7.3e-06	4.68e-06	0	0	1.4e-05	1.21e-05	0	6.3e-06	0	0	0.623334	0.724541	0.131156
K18475	0.000287641	0.000330586	0.000282162	0.000391846	0.000359558	0.000320805	0.000333616	0.000359008	0.000328374	0.000332469	0.00033525	0.00036304	0.000355027	0.00024894	0.000464351	0.000258417	0.000427938	0.000325596	0.622212	0.723451	-0.807419
K07739	1.98e-05	1.98e-05	1.37e-05	8.52e-06	4.55e-06	8.55e-06	1.33e-05	1.09e-05	1.09e-05	9.37e-06	1.48e-05	2.27e-05	4.67e-06	1.82e-05	8.15e-06	1.26e-05	4.81e-06	2.96e-05	0.620964	0.722171	-0.24696
K17242	0	3.31e-06	4.55e-06	4.26e-06	1.37e-05	0	3.34e-06	5.44e-06	3.65e-06	0	9.86e-06	5.67e-06	9.34e-06	6.07e-06	4.07e-06	1.26e-05	0	0	0.620761	0.722106	-0.143657
K15916	9.92e-06	1.65e-05	9.1e-06	8.52e-06	1.37e-05	2.57e-05	2.34e-05	3.26e-05	2.55e-05	9.37e-06	1.97e-05	2.27e-05	9.34e-06	2.43e-05	8.15e-06	3.15e-05	9.62e-06	1.18e-05	0.62038	0.721835	0.264769
K18784	9.92e-06	6.61e-06	9.1e-06	8.52e-06	0	4.28e-06	1e-05	5.44e-06	3.65e-06	4.68e-06	4.93e-06	0	4.67e-06	6.07e-06	8.15e-06	6.3e-06	1.44e-05	0	0.619879	0.721423	0.201887
K17884	4.96e-06	1.32e-05	9.1e-06	4.26e-06	4.55e-06	8.55e-06	1e-05	1.09e-05	7.3e-06	4.68e-06	4.93e-06	1.7e-05	4.67e-06	1.21e-05	4.07e-06	1.26e-05	4.81e-06	1.78e-05	0.619704	0.721392	-0.248941
K14126	4.96e-06	9.92e-06	4.55e-06	4.26e-06	4.55e-06	8.55e-06	1.33e-05	1.09e-05	7.3e-06	4.68e-06	9.86e-06	1.13e-05	4.67e-06	1.21e-05	4.07e-06	1.26e-05	4.81e-06	1.18e-05	0.618685	0.720376	-0.300617
K00283	0.000193414	0.000165293	0.000150183	0.000136294	0.000141093	0.000141154	0.000160136	0.000168625	0.000153241	0.000182624	0.000162695	0.000170175	0.000168171	0.000157865	9.78e-05	0.00017648	0.000144249	0.000201278	0.618162	0.719938	-0.87903
K20627	4.96e-06	3.31e-06	1.82e-05	0	0	4.28e-06	3.34e-06	5.44e-06	3.65e-06	9.37e-06	0	0	9.34e-06	0	4.07e-06	0	9.62e-06	0	0.618057	0.719938	0.111494
K07709	0	3.31e-06	4.55e-06	0	0	0	0	5.44e-06	0	0	0	0	4.67e-06	0	4.07e-06	0	0	0	0.618048	0.719938	0.0768657
K00281	2.48e-05	2.98e-05	2.73e-05	1.28e-05	9.1e-06	2.14e-05	2e-05	4.35e-05	1.82e-05	9.37e-06	2.96e-05	2.27e-05	2.8e-05	3.64e-05	2.04e-05	3.15e-05	1.92e-05	2.96e-05	0.616801	0.718867	-0.349542
K03668	1.49e-05	3.31e-06	4.55e-06	8.52e-06	9.1e-06	4.28e-06	6.67e-06	5.44e-06	7.3e-06	4.68e-06	4.93e-06	5.67e-06	4.67e-06	6.07e-06	8.15e-06	1.26e-05	9.62e-06	0	0.615711	0.717767	0.252746
K19076	0	6.61e-06	4.55e-06	8.52e-06	1.37e-05	4.28e-06	1.33e-05	0	1.46e-05	0	0	5.67e-06	1.4e-05	1.82e-05	1.22e-05	1.89e-05	4.81e-06	5.92e-06	0.614437	0.716453	-0.166726
K02864	0.00130926	0.00131904	0.00117871	0.00120535	0.00127893	0.00121906	0.00121436	0.0011423	0.00124782	0.00125495	0.00128184	0.0012593	0.00126595	0.00116577	0.00110385	0.00124166	0.00116841	0.00124318	0.614297	0.716453	2.76297
K03328	5.46e-05	6.61e-05	4.55e-05	6.39e-05	8.19e-05	3.85e-05	4.67e-05	5.44e-05	3.65e-05	5.15e-05	5.42e-05	3.4e-05	6.54e-05	3.64e-05	8.15e-05	3.78e-05	5.29e-05	4.14e-05	0.611835	0.713759	0.470661
K20265	5.46e-05	4.96e-05	5.92e-05	3.83e-05	2.28e-05	1.71e-05	3e-05	4.9e-05	1.82e-05	4.21e-05	1.97e-05	1.7e-05	5.61e-05	6.07e-05	5.3e-05	6.93e-05	1.92e-05	4.14e-05	0.609483	0.711185	-0.301444
K09976	5.46e-05	6.61e-05	5.46e-05	4.69e-05	5.01e-05	5.99e-05	3.67e-05	5.44e-05	4.74e-05	3.75e-05	3.94e-05	4.54e-05	8.41e-05	6.07e-05	4.48e-05	5.04e-05	3.37e-05	4.74e-05	0.608469	0.710171	0.56178
K02323	4.96e-06	9.92e-06	4.55e-06	4.26e-06	4.55e-06	8.55e-06	1e-05	1.09e-05	1.46e-05	4.68e-06	9.86e-06	1.7e-05	4.67e-06	1.21e-05	4.07e-06	1.26e-05	4.81e-06	1.18e-05	0.608331	0.710171	-0.277821
K01267	0.000396747	0.000426456	0.000445998	0.000489808	0.000427829	0.000402075	0.000433701	0.000484117	0.00046702	0.000454218	0.000438782	0.00043111	0.000518527	0.00038859	0.000533596	0.000384475	0.000504871	0.000420315	0.607883	0.709826	-1.34484
K22516	0	6.61e-06	4.55e-06	0	0	0	6.67e-06	0	0	0	0	5.67e-06	0	0	0	0	0	5.92e-06	0.607146	0.709134	0.0796832
K18335	0	3.31e-06	0	0	4.55e-06	0	6.67e-06	0	0	4.68e-06	0	0	4.67e-06	0	0	0	0	0	0.607097	0.709134	0.0779348
K01610	0.00044634	0.000413233	0.000427794	0.000391846	0.000441483	0.000414908	0.000470398	0.000456919	0.000408643	0.000393343	0.000394411	0.0004538	0.000434441	0.00038859	0.00048879	0.000390778	0.000427938	0.000432155	0.606788	0.709054	1.9309
K09181	1.49e-05	1.65e-05	1.37e-05	8.52e-06	9.1e-06	2.14e-05	1.33e-05	3.81e-05	1.09e-05	9.37e-06	1.48e-05	1.7e-05	9.34e-06	1.82e-05	8.15e-06	2.52e-05	9.62e-06	1.78e-05	0.606289	0.70864	0.276566
K04655	4.96e-05	6.28e-05	6.83e-05	3.41e-05	6.83e-05	5.13e-05	7.34e-05	3.81e-05	6.57e-05	7.96e-05	6.9e-05	3.97e-05	7.01e-05	3.64e-05	6.92e-05	4.41e-05	7.21e-05	6.51e-05	0.605937	0.708398	-0.533589
K20449	0	3.31e-06	4.55e-06	4.26e-06	0	4.28e-06	3.34e-06	0	1.09e-05	9.37e-06	4.93e-06	0	4.67e-06	0	4.07e-06	0	0	0	0.605817	0.708398	0.120251
K10804	9.92e-06	2.64e-05	1.82e-05	2.13e-05	1.37e-05	1.71e-05	2e-05	1.63e-05	2.55e-05	1.87e-05	3.45e-05	1.13e-05	1.87e-05	1.21e-05	1.63e-05	1.89e-05	2.88e-05	2.37e-05	0.605695	0.708398	-0.410628
K02896	4.96e-06	9.92e-06	9.1e-06	4.26e-06	4.55e-06	8.55e-06	1.33e-05	1.09e-05	7.3e-06	4.68e-06	9.86e-06	1.13e-05	4.67e-06	1.21e-05	4.07e-06	1.26e-05	4.81e-06	1.78e-05	0.60565	0.708398	-0.291349
K14261	4.96e-06	1.32e-05	1.37e-05	8.52e-06	9.1e-06	4.28e-06	3.34e-06	2.18e-05	7.3e-06	1.87e-05	9.86e-06	5.67e-06	9.34e-06	1.21e-05	8.15e-06	1.89e-05	9.62e-06	5.92e-06	0.605415	0.708398	-0.260978
K05366	0.000798453	0.000753736	0.000673548	0.0007411	0.00082835	0.00082126	0.000750636	0.000761532	0.000733368	0.000753908	0.000724731	0.00074877	0.000724069	0.000758965	0.000802431	0.000787858	0.000721244	0.000751831	0.605369	0.708398	2.6393
K03429	0.000277723	0.000274387	0.00027306	0.000268329	0.000273082	0.000278031	0.000270229	0.000179504	0.000251753	0.000290325	0.000330319	0.000260935	0.000266271	0.000297514	0.00016293	0.000277326	0.00022599	0.000331516	0.604818	0.708104	-0.84497
K02398	8.43e-05	9.59e-05	0.000100122	0.000123517	0.000145644	0.000162541	0.000140119	0.000119669	0.000127701	8.9e-05	0.000123253	0.000119123	0.000112114	0.000103219	0.000171077	9.45e-05	0.000144249	8.29e-05	0.604755	0.708104	0.609689
K07741	6.45e-05	7.93e-05	6.37e-05	0.000114998	0.000104682	0.000111212	5.34e-05	0.00010879	5.11e-05	6.09e-05	7.4e-05	7.94e-05	5.61e-05	0.000115363	6.52e-05	0.000113452	4.81e-05	8.29e-05	0.604747	0.708104	0.440439
K02950	0.00115552	0.00114713	0.00106038	0.00122239	0.00115605	0.00122334	0.00115431	0.0010607	0.00120769	0.00117066	0.00114872	0.00108345	0.00123792	0.00106255	0.00112829	0.00103367	0.00116361	0.00121359	0.604704	0.708104	2.43621
K03815	4.96e-06	0	0	0	0	0	0	0	3.65e-06	0	0	0	4.67e-06	0	0	0	0	0	0.603205	0.706892	0.0582122
K03469	0.00109105	0.00106118	0.00108769	0.0010648	0.00111053	0.00108646	0.00113429	0.000946475	0.00114201	0.00116598	0.00115365	0.00116286	0.00107442	0.00109291	0.000904262	0.001103	0.00105783	0.00117215	0.603187	0.706892	-2.08369
K16937	4.96e-06	9.92e-06	4.55e-06	8.52e-06	4.55e-06	1.28e-05	6.67e-06	1.63e-05	7.3e-06	4.68e-06	4.93e-06	5.67e-06	4.67e-06	1.82e-05	4.07e-06	1.26e-05	4.81e-06	5.92e-06	0.603139	0.706892	0.243327
K22222	4.96e-06	6.61e-06	4.55e-06	8.52e-06	1.82e-05	1.28e-05	1.33e-05	1.63e-05	1.82e-05	9.37e-06	9.86e-06	5.67e-06	9.34e-06	6.07e-06	4.07e-06	2.52e-05	1.44e-05	5.92e-06	0.602997	0.706892	0.246894
K01867	0.00111089	0.00114713	0.00109679	0.00103498	0.00107412	0.0010608	0.00107758	0.000968233	0.00112377	0.00108169	0.00114379	0.00108912	0.00112581	0.00106255	0.00100609	0.00105258	0.0011011	0.00114255	0.602721	0.706892	-3.04242
K00703	0.000872843	0.000852912	0.000823731	0.00084758	0.000887517	0.000859757	0.000864065	0.000859443	0.000853772	0.000833513	0.000838124	0.000862221	0.000873554	0.000880399	0.000924629	0.000800464	0.00095685	0.00083471	0.60178	0.706067	-3.26209
K02933	0.00127455	0.00119342	0.00116051	0.00119257	0.00121977	0.00118484	0.00115765	0.00109878	0.00125877	0.00121281	0.00125719	0.00116854	0.00121457	0.00117184	0.00109163	0.00117233	0.00113476	0.00120174	0.601589	0.706013	3.22488
K00800	0.000838127	0.000869442	0.0009102	0.000830544	0.00082835	0.000799873	0.000857393	0.000941036	0.000893906	0.000870974	0.000897285	0.000850876	0.000920268	0.000825754	0.000977581	0.000831978	0.000879918	0.00082287	0.601174	0.705695	-2.51525
K02686	4.96e-06	3.31e-06	4.55e-06	4.26e-06	4.55e-06	4.28e-06	3.34e-06	5.44e-06	3.65e-06	4.68e-06	0	0	9.34e-06	6.07e-06	8.15e-06	1.26e-05	4.81e-06	0	0.601067	0.705695	-0.200767
K15894	4.96e-06	6.61e-06	1.82e-05	4.26e-06	0	4.28e-06	6.67e-06	0	7.3e-06	4.68e-06	0	1.13e-05	0	6.07e-06	0	1.26e-05	0	5.92e-06	0.600687	0.705461	0.138837
K02168	4.96e-06	0	1.37e-05	1.28e-05	0	0	3.34e-06	0	3.65e-06	4.68e-06	4.93e-06	0	0	6.07e-06	0	0	0	1.18e-05	0.600491	0.705401	0.105346
K02521	1.98e-05	6.61e-06	3.19e-05	8.52e-06	1.37e-05	1.28e-05	1.33e-05	1.63e-05	1.82e-05	1.4e-05	1.97e-05	1.13e-05	4.67e-06	2.43e-05	8.15e-06	2.52e-05	4.81e-06	1.18e-05	0.600176	0.7052	0.270585
K10188	3.97e-05	3.31e-05	5.46e-05	5.11e-05	5.01e-05	2.99e-05	4.34e-05	7.07e-05	3.28e-05	4.21e-05	2.47e-05	5.11e-05	3.74e-05	3.64e-05	4.48e-05	3.15e-05	6.73e-05	4.14e-05	0.600002	0.705164	0.478939
K06941	0.00110593	0.00106779	0.00107404	0.00102221	0.00108778	0.00100519	0.00106757	0.00102807	0.00102161	0.00112384	0.00108463	0.00109479	0.0010791	0.00101398	0.000969434	0.0010904	0.00105783	0.00105967	0.599798	0.705094	-3.58636
K01463	4.96e-06	3.31e-06	9.1e-06	0	0	0	6.67e-06	0	3.65e-06	1.4e-05	0	5.67e-06	0	6.07e-06	0	1.26e-05	0	0	0.599581	0.705008	-0.109215
K06973	0.0007439	0.000780183	0.000664446	0.000685731	0.000737322	0.000701493	0.000727282	0.000685379	0.000616613	0.000618111	0.000759242	0.000737425	0.000766112	0.000643602	0.000777991	0.000617681	0.000827026	0.000739991	0.599052	0.704555	-1.5649
K07315	0.000188455	0.000145458	0.000204795	0.000149072	0.000186606	0.000153986	0.000200169	0.000206701	0.000175133	0.000149845	0.000187345	0.000170175	0.000168171	0.000218582	0.000130344	0.000201692	0.000153865	0.000171678	0.597537	0.702942	0.959845
K06929	9.92e-06	3.31e-06	4.55e-06	0	0	0	6.67e-06	5.44e-06	3.65e-06	4.68e-06	4.93e-06	0	4.67e-06	1.21e-05	4.07e-06	1.26e-05	0	0	0.59704	0.702526	-0.143834
K02919	0.000128943	0.000125623	0.000127428	0.000136294	0.00010013	0.000132599	0.000160136	0.000141427	0.000134998	0.000103018	0.000108463	0.000130468	0.000154157	0.000163936	0.000154784	0.000189086	0.000125016	0.000112479	0.595811	0.701249	-0.811259
K00700	0.000778615	0.000813242	0.000778221	0.000762396	0.000901172	0.000842647	0.000810686	0.000821366	0.000853772	0.000852243	0.00070008	0.000794151	0.000882897	0.00074075	0.000867603	0.00072483	0.000932809	0.000710391	0.595661	0.701242	1.67634
K22251	0	6.61e-06	1.37e-05	0	4.55e-06	0	3.34e-06	0	0	0	4.93e-06	0	4.67e-06	6.07e-06	4.07e-06	1.26e-05	0	5.92e-06	0.59489	0.700502	-0.119362
K20810	1.98e-05	9.92e-06	9.1e-06	8.52e-06	9.1e-06	4.28e-06	1e-05	0	1.09e-05	9.37e-06	9.86e-06	0	0	1.21e-05	8.15e-06	1.89e-05	9.62e-06	0	0.594667	0.700408	0.198718
K16370	4.96e-06	9.92e-06	9.1e-06	8.52e-06	1.37e-05	4.28e-06	1.33e-05	5.44e-06	7.3e-06	4.68e-06	9.86e-06	1.13e-05	9.34e-06	1.82e-05	4.07e-06	1.26e-05	9.62e-06	5.92e-06	0.594494	0.700372	-0.323618
K18925	1.49e-05	6.61e-06	4.55e-06	4.26e-06	4.55e-06	0	3.34e-06	1.09e-05	7.3e-06	9.37e-06	4.93e-06	5.67e-06	9.34e-06	6.07e-06	8.15e-06	1.26e-05	9.62e-06	0	0.592988	0.698766	-0.238739
K07150	0.00037195	0.000436374	0.000377733	0.000391846	0.000286736	0.000342192	0.000430364	0.000391645	0.00041594	0.000421439	0.000399341	0.000425438	0.000359699	0.00035216	0.000370666	0.000428595	0.000375047	0.000402555	0.592832	0.698751	-1.41426
K06413	3.47e-05	1.65e-05	4.1e-05	2.56e-05	3.64e-05	3.42e-05	4e-05	2.72e-05	2.92e-05	9.37e-06	3.45e-05	2.27e-05	4.2e-05	3.04e-05	3.26e-05	5.04e-05	1.44e-05	2.37e-05	0.592822	0.698751	0.402527
K02782	4.96e-06	1.65e-05	9.1e-06	2.56e-05	4.55e-06	1.28e-05	3.34e-06	5.44e-06	7.3e-06	0	1.48e-05	2.27e-05	4.67e-06	6.07e-06	8.15e-06	6.3e-06	4.81e-06	5.92e-06	0.592716	0.698751	0.18428
K07792	9.92e-06	1.65e-05	2.28e-05	1.7e-05	1.82e-05	1.28e-05	1e-05	5.44e-06	7.3e-06	1.87e-05	1.97e-05	5.67e-06	1.4e-05	1.82e-05	1.22e-05	2.52e-05	1.44e-05	5.92e-06	0.592676	0.698751	-0.330946
K06980	9.92e-06	6.61e-06	9.1e-06	4.26e-06	4.55e-06	8.55e-06	6.67e-06	5.44e-06	7.3e-06	0	4.93e-06	0	1.4e-05	1.21e-05	4.07e-06	1.26e-05	4.81e-06	0	0.591815	0.698225	0.213417
K14091	0	0	0	0	0	0	0	5.44e-06	3.65e-06	0	0	0	0	0	0	0	4.81e-06	0	0.591523	0.698048	0.0597471
K01337	4.96e-06	6.61e-06	4.55e-06	8.52e-06	9.1e-06	4.28e-06	6.67e-06	5.44e-06	0	0	9.86e-06	1.13e-05	9.34e-06	6.07e-06	4.07e-06	6.3e-06	0	1.18e-05	0.59063	0.697162	-0.233734
K09811	0.000833168	0.000757042	0.000741813	0.000834803	0.000851106	0.000902531	0.000770652	0.000810487	0.000751611	0.0008101	0.000778962	0.000782806	0.000850197	0.000789323	0.000916482	0.000787858	0.000855876	0.00079919	0.590417	0.69708	-2.30165
K13622	9.92e-06	1.65e-05	0	4.26e-06	4.55e-06	0	3.34e-06	5.44e-06	3.65e-06	4.68e-06	4.93e-06	5.67e-06	4.67e-06	6.07e-06	0	6.3e-06	0	5.92e-06	0.589711	0.696414	0.169389
K02230	9.42e-05	6.28e-05	8.19e-05	7.24e-05	6.37e-05	5.56e-05	6.34e-05	9.79e-05	7.3e-05	4.68e-05	7.89e-05	7.94e-05	6.07e-05	8.5e-05	5.7e-05	9.45e-05	6.25e-05	6.51e-05	0.589645	0.696414	0.687436
K03490	8.43e-05	0.000102482	0.000100122	8.94e-05	9.1e-05	8.13e-05	9.67e-05	0.00011423	7.66e-05	9.37e-05	5.92e-05	6.24e-05	0.000102771	8.5e-05	0.000114051	7.56e-05	0.000139441	5.33e-05	0.589455	0.696414	0.595278
K10550	0	3.31e-06	0	4.26e-06	4.55e-06	0	3.34e-06	5.44e-06	0	0	4.93e-06	5.67e-06	0	6.07e-06	4.07e-06	6.3e-06	0	0	0.589173	0.696283	-0.145451
K21576	4.96e-06	2.98e-05	2.73e-05	2.98e-05	0	2.14e-05	2.34e-05	1.63e-05	2.19e-05	3.28e-05	3.45e-05	1.7e-05	1.4e-05	1.21e-05	1.22e-05	1.26e-05	2.88e-05	3.55e-05	0.588667	0.695852	-0.283796
K02909	0.0011952	0.00111738	0.00108314	0.00106906	0.00114239	0.00114207	0.00104755	0.000973673	0.00110917	0.00119408	0.001129	0.00106643	0.00116318	0.00110505	0.00102239	0.00108409	0.00111552	0.00113663	0.587099	0.694167	-2.74058
K03834	0	3.31e-06	0	0	0	4.28e-06	3.34e-06	5.44e-06	0	0	4.93e-06	5.67e-06	0	6.07e-06	0	0	0	5.92e-06	0.58698	0.694167	-0.118052
K07665	1.49e-05	0	0	0	0	0	6.67e-06	0	0	0	9.86e-06	0	0	6.07e-06	4.07e-06	6.3e-06	0	5.92e-06	0.585153	0.6922	-0.0961148
K01889	0.0010117	0.00105788	0.00100577	0.00101369	0.00105137	0.00100091	0.00102754	0.000919278	0.00101796	0.00107233	0.000995888	0.00105509	0.000980997	0.00104434	0.000961288	0.00100846	0.0009857	0.00110703	0.585134	0.6922	-3.31961
K07457	4.96e-06	6.61e-06	9.1e-06	8.52e-06	4.55e-06	0	3.34e-06	1.09e-05	1.46e-05	9.37e-06	4.93e-06	1.13e-05	0	6.07e-06	8.15e-06	6.3e-06	9.62e-06	1.78e-05	0.584941	0.6922	-0.236612
K09724	0	3.31e-06	0	0	0	0	3.34e-06	0	0	0	0	5.67e-06	0	0	0	0	0	5.92e-06	0.584034	0.691377	-0.0706806
K14107	0	3.31e-06	0	0	0	0	3.34e-06	0	0	0	0	5.67e-06	0	0	0	0	0	5.92e-06	0.584034	0.691377	-0.0706806
K19266	0	3.31e-06	0	0	0	0	3.34e-06	0	0	0	0	5.67e-06	0	0	0	0	0	5.92e-06	0.584034	0.691377	-0.0706806
K01258	0.00066951	0.000644643	0.000641691	0.000557955	0.000523408	0.000568894	0.0005905	0.000641862	0.000642153	0.000580649	0.000596547	0.000584268	0.000593269	0.000576813	0.000635428	0.000605075	0.000653928	0.000556473	0.583329	0.691045	2.1262
K11891	4.96e-06	3.31e-06	1.37e-05	0	4.55e-06	8.55e-06	0	0	0	4.68e-06	0	0	0	6.07e-06	8.15e-06	6.3e-06	0	0	0.582267	0.689954	0.117983
K03806	9.92e-06	6.61e-06	1.37e-05	4.26e-06	4.55e-06	8.55e-06	3.34e-06	1.09e-05	3.65e-06	9.37e-06	0	5.67e-06	9.34e-06	6.07e-06	8.15e-06	1.26e-05	4.81e-06	0	0.581912	0.689699	0.248334
K16710	2.98e-05	1.98e-05	2.73e-05	2.98e-05	3.19e-05	2.99e-05	6.67e-06	3.26e-05	2.92e-05	2.81e-05	1.97e-05	3.97e-05	2.8e-05	1.82e-05	4.07e-05	1.26e-05	4.33e-05	2.96e-05	0.581368	0.689222	-0.420652
K22212	4.96e-06	0	4.55e-06	0	4.55e-06	0	0	0	0	0	0	5.67e-06	4.67e-06	0	0	0	0	1.18e-05	0.580922	0.68886	-0.0871759
K07991	4.96e-06	9.92e-06	4.55e-06	4.26e-06	4.55e-06	4.28e-06	6.67e-06	1.09e-05	7.3e-06	4.68e-06	4.93e-06	1.13e-05	4.67e-06	1.21e-05	4.07e-06	6.3e-06	4.81e-06	1.18e-05	0.580599	0.688644	-0.327217
K14187	9.92e-06	9.92e-06	1.37e-05	4.26e-06	4.55e-06	1.28e-05	6.67e-06	1.63e-05	7.3e-06	4.68e-06	9.86e-06	1.13e-05	4.67e-06	1.21e-05	4.07e-06	1.26e-05	4.81e-06	1.18e-05	0.579798	0.68786	0.331299
K17467	0	6.61e-06	0	4.26e-06	9.1e-06	0	0	5.44e-06	0	4.68e-06	4.93e-06	0	4.67e-06	6.07e-06	8.15e-06	0	4.81e-06	0	0.579755	0.68786	-0.145515
K02952	0.00119024	0.00120664	0.00120601	0.00123091	0.00122432	0.00126611	0.00115431	0.00113142	0.00121133	0.00113788	0.00125719	0.00112316	0.00123325	0.0012022	0.00112014	0.00117864	0.00117803	0.00127278	0.579407	0.68773	3.57705
K00245	1.49e-05	1.65e-05	2.73e-05	1.28e-05	9.1e-06	8.55e-06	3.34e-06	1.63e-05	1.46e-05	1.87e-05	4.93e-06	5.67e-06	1.4e-05	2.43e-05	2.04e-05	1.26e-05	2.88e-05	1.18e-05	0.57892	0.687318	-0.292114
K03762	0	1.32e-05	4.55e-06	2.56e-05	2.28e-05	1.71e-05	0	0	0	0	0	0	0	2.43e-05	8.15e-06	2.52e-05	0	0	0.578909	0.687318	0.108228
K11928	0.000342194	0.000333892	0.000354978	0.000357773	0.000314045	0.000380688	0.00039033	0.000386205	0.000361211	0.000393343	0.00035497	0.000397075	0.000303642	0.000400733	0.000329934	0.000384475	0.00039428	0.000337436	0.577965	0.686517	-1.72699
K16917	0	3.31e-06	0	0	4.55e-06	0	0	0	0	0	0	0	0	0	4.07e-06	0	0	0	0.577647	0.686307	0.0623051
K00018	0.000421543	0.000442985	0.000450549	0.000455734	0.00043238	0.00041063	0.000423692	0.000456919	0.000426886	0.000435487	0.000448643	0.00040842	0.00042977	0.000400733	0.000464351	0.000466412	0.000524104	0.000414395	0.577129	0.685857	-2.21223
K03319	1.49e-05	3.31e-05	3.64e-05	1.7e-05	1.82e-05	1.28e-05	1.67e-05	2.18e-05	1.82e-05	1.4e-05	9.86e-06	0	4.67e-05	0	3.67e-05	6.3e-06	1.44e-05	2.96e-05	0.57681	0.685645	0.218502
K17243	4.96e-06	3.31e-06	9.1e-06	8.52e-06	4.55e-06	0	1.33e-05	1.09e-05	1.09e-05	4.68e-06	9.86e-06	1.13e-05	9.34e-06	0	4.07e-06	6.3e-06	9.62e-06	0	0.576171	0.685051	0.232177
K09020	0	3.31e-06	4.55e-06	0	0	0	3.34e-06	5.44e-06	0	0	4.93e-06	5.67e-06	4.67e-06	0	8.15e-06	0	0	0	0.576022	0.685041	-0.117943
K02283	0.000411625	0.000469432	0.000441447	0.000468512	0.000546165	0.000603113	0.000463726	0.000478677	0.000481615	0.000524458	0.000399341	0.000436783	0.000537212	0.000406805	0.000586548	0.000340355	0.000504871	0.000461754	0.575511	0.684599	1.03121
K01220	0	0	0	0	4.55e-06	0	3.34e-06	0	0	0	0	0	0	0	4.07e-06	0	0	0	0.575372	0.684599	0.0627078
K01569	4.96e-06	3.31e-06	0	4.26e-06	9.1e-06	4.28e-06	0	0	0	0	0	0	9.34e-06	6.07e-06	8.15e-06	1.26e-05	0	0	0.574467	0.683689	-0.121856
K00600	0.000679429	0.000737207	0.00072816	0.000719804	0.000710014	0.000765654	0.000717274	0.000707137	0.000718773	0.00068835	0.000631058	0.00077146	0.000668012	0.000783252	0.00066394	0.000743738	0.000726052	0.000710391	0.573948	0.683239	2.67153
K01270	0.000570323	0.000618196	0.000600732	0.000553696	0.000609884	0.000590281	0.000600508	0.000728895	0.000627559	0.000613428	0.000621198	0.000606958	0.000691369	0.000534311	0.000782065	0.000542046	0.00075971	0.000532793	0.573077	0.682368	-1.23324
K11384	0	0	4.55e-06	4.26e-06	4.55e-06	0	0	5.44e-06	0	0	0	0	0	6.07e-06	0	6.3e-06	0	0	0.570272	0.679193	0.0996787
K03223	4.96e-06	9.92e-06	4.55e-06	8.52e-06	9.1e-06	0	6.67e-06	5.44e-06	7.3e-06	4.68e-06	9.86e-06	5.67e-06	4.67e-06	1.21e-05	4.07e-06	1.26e-05	4.81e-06	5.92e-06	0.56885	0.677663	-0.316032
K03224	4.96e-06	9.92e-06	4.55e-06	8.52e-06	9.1e-06	0	6.67e-06	5.44e-06	7.3e-06	4.68e-06	9.86e-06	5.67e-06	4.67e-06	1.21e-05	4.07e-06	1.26e-05	4.81e-06	5.92e-06	0.56885	0.677663	-0.316032
K09801	4.96e-06	3.31e-06	4.55e-06	4.26e-06	4.55e-06	4.28e-06	3.34e-06	5.44e-06	3.65e-06	4.68e-06	0	0	4.67e-06	1.21e-05	8.15e-06	1.26e-05	4.81e-06	0	0.568486	0.67756	-0.204286
K12993	0	0	0	0	0	0	3.34e-06	0	3.65e-06	0	0	0	4.67e-06	0	8.15e-06	0	0	0	0.568301	0.677504	-0.0705799
K12996	1.49e-05	1.32e-05	4.55e-06	4.26e-05	3.64e-05	4.28e-05	1.67e-05	2.18e-05	1.82e-05	1.87e-05	1.97e-05	5.67e-06	1.87e-05	1.82e-05	3.67e-05	1.26e-05	3.37e-05	1.78e-05	0.568065	0.677388	0.278125
K21395	2.48e-05	3.97e-05	5.01e-05	2.56e-05	1.82e-05	3.85e-05	3.34e-05	5.44e-05	3.28e-05	2.34e-05	3.45e-05	6.81e-05	3.27e-05	5.46e-05	2.44e-05	5.67e-05	2.88e-05	2.96e-05	0.566437	0.675611	-0.398193
K21401	4.96e-06	3.31e-06	0	0	0	0	3.34e-06	0	3.65e-06	4.68e-06	0	0	0	6.07e-06	0	0	4.81e-06	5.92e-06	0.565436	0.674581	-0.124498
K02922	4.96e-06	1.32e-05	9.1e-06	4.26e-06	4.55e-06	8.55e-06	1e-05	1.09e-05	1.09e-05	4.68e-06	9.86e-06	1.7e-05	4.67e-06	1.21e-05	4.07e-06	1.26e-05	4.81e-06	1.78e-05	0.565193	0.674457	-0.309861
K02854	6.94e-05	8.26e-05	8.65e-05	7.24e-05	7.74e-05	8.98e-05	0.000110093	4.9e-05	0.000109458	8.43e-05	7.4e-05	7.37e-05	7.01e-05	4.86e-05	8.55e-05	7.56e-05	0.000125016	5.92e-05	0.564993	0.674381	0.601878
K02879	0.00126959	0.00126945	0.0011423	0.0012522	0.00121977	0.001249	0.0012177	0.00110966	0.00118214	0.00117535	0.0012917	0.00110614	0.0011772	0.00126899	0.00109978	0.00122906	0.00114918	0.00125503	0.564566	0.674037	2.87722
K22736	0	3.31e-06	0	0	9.1e-06	0	0	0	0	0	0	0	0	0	0	0	0	5.92e-06	0.56388	0.673383	0.0600018
K20509	0	3.31e-06	0	4.26e-06	4.55e-06	4.28e-06	3.34e-06	0	3.65e-06	0	0	0	0	6.07e-06	0	6.3e-06	4.81e-06	0	0.563853	0.673383	0.13881
K11249	3.47e-05	2.98e-05	4.55e-05	4.69e-05	3.64e-05	4.28e-05	5e-05	5.44e-05	5.47e-05	3.75e-05	5.92e-05	3.97e-05	3.74e-05	5.46e-05	2.85e-05	4.41e-05	2.88e-05	4.14e-05	0.563844	0.673383	0.678534
K18581	9.92e-05	0.000105788	9.56e-05	0.000102221	7.28e-05	0.000102658	0.000113429	0.000130548	0.000102161	0.000135797	6.41e-05	0.000102105	0.0001308	6.68e-05	0.000224029	0.000100846	0.000144249	5.33e-05	0.56356	0.673383	-0.424276
K11814	4.96e-06	0	4.55e-06	8.52e-06	0	4.28e-06	0	0	0	0	4.93e-06	0	0	6.07e-06	4.07e-06	0	0	0	0.562765	0.672707	0.110307
K07552	7.44e-05	4.3e-05	9.56e-05	5.54e-05	6.37e-05	4.71e-05	6.01e-05	6.53e-05	4.74e-05	3.75e-05	3.94e-05	3.97e-05	8.41e-05	7.89e-05	7.74e-05	6.93e-05	4.33e-05	3.55e-05	0.561104	0.670885	0.485617
K13684	9.92e-06	1.65e-05	0	8.52e-06	9.1e-06	1.28e-05	1.67e-05	1.63e-05	0	4.68e-06	1.97e-05	1.7e-05	4.67e-06	1.21e-05	4.07e-06	6.3e-06	4.81e-06	0	0.560845	0.670739	0.213213
K01496	7.93e-05	0.000109093	0.000122877	0.000114998	9.56e-05	8.13e-05	9.67e-05	0.00010879	9.12e-05	9.83e-05	0.000103533	0.00011345	8.88e-05	0.000103219	6.52e-05	0.000144966	0.000105782	0.000124318	0.560753	0.670739	-0.835756
K01093	4.96e-06	3.31e-06	4.55e-06	4.26e-06	4.55e-06	4.28e-06	6.67e-06	1.09e-05	3.65e-06	4.68e-06	4.93e-06	0	4.67e-06	6.07e-06	4.07e-06	6.3e-06	9.62e-06	0	0.560726	0.670739	0.278081
K13788	9.92e-06	6.61e-06	1.82e-05	8.52e-06	9.1e-06	8.55e-06	3.34e-06	5.44e-06	1.09e-05	1.87e-05	0	1.13e-05	4.67e-06	1.21e-05	4.07e-06	1.26e-05	1.92e-05	1.18e-05	0.558315	0.668203	-0.275917
K06310	4.46e-05	3.64e-05	4.1e-05	2.98e-05	4.55e-05	5.99e-05	3.34e-05	5.98e-05	4.01e-05	2.81e-05	2.96e-05	4.54e-05	5.14e-05	3.64e-05	6.92e-05	3.15e-05	4.33e-05	2.37e-05	0.557541	0.66744	0.515101
K06867	3.47e-05	1.32e-05	1.37e-05	1.7e-05	3.64e-05	2.14e-05	2e-05	2.18e-05	1.82e-05	1.87e-05	2.96e-05	1.13e-05	1.4e-05	4.25e-05	2.04e-05	4.41e-05	2.4e-05	1.78e-05	0.557288	0.667301	-0.353775
K21703	0	0	4.55e-06	0	0	8.55e-06	0	1.09e-05	0	4.68e-06	0	5.67e-06	4.67e-06	0	0	0	0	0	0.557199	0.667301	0.0954769
K07533	0.000213251	0.000254551	0.000268509	0.00026407	0.000254877	0.00031225	0.000200169	0.000271976	0.000244456	0.000154528	0.000192275	0.000187193	0.000308313	0.000206438	0.000354373	0.000214297	0.000336581	0.000183518	0.556858	0.667113	0.663894
K19431	9.92e-06	3.31e-06	4.55e-06	4.26e-06	4.55e-06	4.28e-06	3.34e-06	0	3.65e-06	1.4e-05	0	5.67e-06	0	6.07e-06	0	6.3e-06	9.62e-06	5.92e-06	0.556827	0.667113	-0.193505
K03297	4.96e-05	1.65e-05	3.19e-05	1.28e-05	9.1e-06	2.99e-05	1e-05	1.63e-05	2.19e-05	2.34e-05	4.93e-06	0	1.87e-05	6.07e-06	4.07e-05	1.89e-05	3.85e-05	1.18e-05	0.556701	0.667113	0.227202
K21910	9.92e-06	1.65e-05	1.37e-05	4.26e-06	4.55e-06	4.28e-06	1e-05	5.44e-06	3.65e-06	1.4e-05	1.48e-05	5.67e-06	0	0	8.15e-06	6.3e-06	4.81e-06	5.92e-06	0.556237	0.666857	0.230304
K19051	0	1.32e-05	4.55e-06	8.52e-06	9.1e-06	4.28e-06	6.67e-06	1.09e-05	7.3e-06	9.37e-06	4.93e-06	5.67e-06	4.67e-06	6.07e-06	4.07e-06	6.3e-06	9.62e-06	5.92e-06	0.555845	0.666551	0.339231
K07586	8.43e-05	8.6e-05	9.56e-05	7.67e-05	9.1e-05	5.99e-05	9.01e-05	4.9e-05	0.000105809	8.9e-05	9.37e-05	9.64e-05	9.81e-05	9.71e-05	5.7e-05	9.45e-05	5.29e-05	0.000106559	0.555795	0.666551	-0.719653
K01195	9.42e-05	7.93e-05	7.28e-05	5.96e-05	6.83e-05	5.13e-05	9.34e-05	9.79e-05	8.39e-05	6.09e-05	5.92e-05	7.94e-05	7.01e-05	8.5e-05	9.37e-05	6.3e-05	9.14e-05	5.92e-05	0.555454	0.666409	0.778431
K10551	0	3.31e-06	0	4.26e-06	4.55e-06	0	3.34e-06	5.44e-06	3.65e-06	4.68e-06	4.93e-06	0	4.67e-06	6.07e-06	4.07e-06	6.3e-06	0	0	0.555181	0.666245	-0.198829
K07573	4.96e-06	1.32e-05	9.1e-06	4.26e-06	4.55e-06	4.28e-06	1.33e-05	1.09e-05	1.09e-05	4.68e-06	9.86e-06	1.7e-05	4.67e-06	1.21e-05	4.07e-06	1.26e-05	4.81e-06	1.78e-05	0.554806	0.665958	-0.298652
K08302	0.000128943	8.6e-05	6.83e-05	0.00010648	9.56e-05	8.55e-05	9.67e-05	0.000103351	0.000105809	6.56e-05	9.37e-05	0.000119123	0.000112114	7.29e-05	0.000142564	6.93e-05	9.14e-05	4.74e-05	0.554473	0.665721	0.601799
K09746	4.96e-06	6.61e-06	4.55e-06	4.26e-06	9.1e-06	8.55e-06	1e-05	1.09e-05	7.3e-06	4.68e-06	9.86e-06	1.13e-05	4.67e-06	1.82e-05	4.07e-06	1.26e-05	4.81e-06	5.92e-06	0.554037	0.665361	-0.321609
K07067	4.46e-05	4.3e-05	4.55e-05	4.69e-05	6.83e-05	9.41e-05	3.67e-05	1.09e-05	3.28e-05	4.21e-05	6.41e-05	3.97e-05	5.61e-05	3.64e-05	2.04e-05	2.52e-05	2.88e-05	5.92e-05	0.552997	0.664275	0.351078
K21064	2.48e-05	2.98e-05	9.1e-06	1.7e-05	1.82e-05	2.99e-05	2e-05	3.26e-05	2.19e-05	9.37e-06	2.47e-05	3.4e-05	1.87e-05	2.43e-05	3.26e-05	3.78e-05	1.92e-05	2.37e-05	0.552664	0.664038	-0.456219
K22026	4.96e-06	1.32e-05	4.55e-06	8.52e-06	4.55e-06	8.55e-06	1.33e-05	1.09e-05	7.3e-06	4.68e-06	9.86e-06	1.7e-05	4.67e-06	1.21e-05	4.07e-06	1.89e-05	4.81e-06	1.18e-05	0.551994	0.663395	-0.306149
K21465	3.97e-05	4.63e-05	4.55e-05	3.41e-05	3.64e-05	2.99e-05	4e-05	1.63e-05	3.28e-05	3.75e-05	3.94e-05	5.11e-05	4.2e-05	5.46e-05	1.63e-05	4.41e-05	1.44e-05	5.33e-05	0.551705	0.663211	-0.479964
K03124	4.96e-06	1.32e-05	9.1e-06	4.26e-06	4.55e-06	8.55e-06	1.33e-05	1.09e-05	7.3e-06	4.68e-06	9.86e-06	1.13e-05	9.34e-06	1.21e-05	4.07e-06	1.89e-05	4.81e-06	1.18e-05	0.551535	0.66317	-0.343004
K00863	0	1.32e-05	1.82e-05	1.7e-05	9.1e-06	0	3.34e-06	1.09e-05	3.65e-06	4.68e-06	4.93e-06	1.13e-05	4.67e-06	1.21e-05	0	6.3e-06	4.81e-06	1.18e-05	0.551211	0.662943	0.208008
K05573	9.92e-06	3.31e-06	4.55e-06	0	0	4.28e-06	6.67e-06	0	3.65e-06	0	0	5.67e-06	0	6.07e-06	0	6.3e-06	0	5.92e-06	0.550755	0.662558	0.151829
K03623	4.46e-05	7.27e-05	5.01e-05	5.96e-05	3.19e-05	7.27e-05	6.67e-05	3.81e-05	6.57e-05	5.15e-05	8.38e-05	4.54e-05	4.67e-05	7.29e-05	5.7e-05	6.3e-05	5.29e-05	6.51e-05	0.550662	0.662558	-0.652443
K08316	0.000272763	0.000297528	0.00027306	0.000251293	0.000277634	0.000273753	0.000270229	0.000250218	0.000269996	0.000248181	0.000315529	0.000232573	0.000266271	0.000230725	0.000276981	0.000283629	0.00025484	0.000272317	0.549194	0.661005	1.98749
K10008	2.48e-05	6.61e-06	0	8.52e-06	9.1e-06	4.28e-06	1e-05	1.09e-05	1.82e-05	9.37e-06	9.86e-06	5.67e-06	0	6.07e-06	4.07e-06	0	1.44e-05	2.37e-05	0.548604	0.660457	0.197027
K19710	9.92e-06	9.92e-06	9.1e-06	4.26e-06	9.1e-06	0	1e-05	1.09e-05	1.82e-05	4.68e-06	1.48e-05	5.67e-06	4.67e-06	1.82e-05	0	1.26e-05	0	5.92e-06	0.548512	0.660457	0.228424
K02589	1.98e-05	6.61e-06	9.1e-06	8.52e-06	1.82e-05	8.55e-06	1e-05	5.44e-06	1.82e-05	9.37e-06	9.86e-06	5.67e-06	9.34e-06	1.21e-05	1.22e-05	1.26e-05	1.92e-05	0	0.546833	0.658649	0.320016
K01547	9.92e-06	1.32e-05	1.82e-05	8.52e-06	4.55e-06	4.28e-06	6.67e-06	1.63e-05	3.65e-06	4.68e-06	0	0	0	1.82e-05	1.63e-05	2.52e-05	0	0	0.54653	0.658446	0.165845
K00518	0	3.31e-06	4.55e-06	0	0	0	3.34e-06	0	0	0	0	0	0	6.07e-06	0	0	0	0	0.546492	0.658446	0.0780154
K16792	0	3.31e-06	0	0	0	0	3.34e-06	0	3.65e-06	4.68e-06	0	5.67e-06	0	0	0	0	0	5.92e-06	0.546182	0.65835	-0.103296
K22481	0	3.31e-06	0	0	0	0	3.34e-06	0	3.65e-06	4.68e-06	0	5.67e-06	0	0	0	0	0	5.92e-06	0.546182	0.65835	-0.103296
K09739	4.96e-06	1.32e-05	9.1e-06	4.26e-06	4.55e-06	4.28e-06	1.33e-05	1.09e-05	1.09e-05	9.37e-06	9.86e-06	1.7e-05	4.67e-06	1.21e-05	4.07e-06	1.26e-05	4.81e-06	1.18e-05	0.545729	0.658128	-0.347375
K21313	0	0	0	4.26e-06	4.55e-06	0	0	0	0	0	0	0	4.67e-06	0	4.07e-06	0	0	5.92e-06	0.545565	0.658093	-0.0933995
K00557	9.92e-06	9.92e-06	9.1e-06	8.52e-06	4.55e-06	8.55e-06	6.67e-06	1.63e-05	3.65e-06	4.68e-06	9.86e-06	5.67e-06	9.34e-06	1.82e-05	8.15e-06	2.52e-05	4.81e-06	5.92e-06	0.545497	0.658093	-0.268662
K00077	0.000287641	0.000300833	0.000304917	0.000293885	0.000300391	0.00031225	0.000320271	0.000304613	0.000350265	0.000276277	0.000305669	0.00034035	0.000284956	0.00035216	0.000272908	0.000371869	0.000312539	0.000331516	0.545471	0.658093	-1.78978
K07029	2.98e-05	7.27e-05	3.64e-05	1.7e-05	3.64e-05	2.99e-05	1.67e-05	1.09e-05	3.28e-05	2.81e-05	3.45e-05	1.7e-05	4.67e-05	2.43e-05	3.26e-05	6.3e-06	2.4e-05	2.96e-05	0.545452	0.658093	0.310005
K00537	0.000441381	0.000406621	0.000418692	0.000396105	0.000323147	0.000414908	0.000397003	0.000407963	0.000353914	0.000416756	0.000290878	0.000289298	0.000439113	0.000303586	0.000509157	0.000334052	0.000509679	0.000278237	0.544548	0.657514	0.858046
K15449	4.96e-06	1.32e-05	4.55e-06	4.26e-06	4.55e-06	8.55e-06	1.33e-05	1.09e-05	1.09e-05	4.68e-06	9.86e-06	1.7e-05	4.67e-06	1.21e-05	4.07e-06	1.26e-05	4.81e-06	1.78e-05	0.544357	0.657446	-0.306896
K09157	0.000525689	0.000552079	0.000523365	0.000557955	0.000587127	0.000564617	0.000533785	0.000587467	0.000510803	0.000590015	0.000512735	0.00054456	0.000513855	0.000510024	0.000602842	0.000516835	0.000581803	0.000473594	0.544341	0.657446	2.3728
K16850	0	1.32e-05	1.37e-05	3.41e-05	1.37e-05	1.28e-05	2e-05	1.63e-05	1.46e-05	1.4e-05	9.86e-06	3.4e-05	2.34e-05	1.82e-05	1.63e-05	2.52e-05	1.44e-05	5.92e-06	0.543547	0.656791	-0.30796
K02596	4.96e-06	0	1.37e-05	4.26e-06	9.1e-06	0	3.34e-06	5.44e-06	0	0	4.93e-06	1.7e-05	0	6.07e-06	4.07e-06	6.3e-06	0	1.78e-05	0.542319	0.655469	-0.149234
K11062	4.96e-06	0	0	0	0	4.28e-06	0	0	0	4.68e-06	0	0	4.67e-06	6.07e-06	0	0	0	0	0.542297	0.655469	-0.0943964
K21490	0	0	0	4.26e-06	0	0	0	0	0	0	0	0	4.67e-06	0	4.07e-06	0	0	0	0.542291	0.655469	-0.0686481
K04068	0.00141837	0.00133557	0.00130159	0.00142683	0.00145644	0.00143293	0.00134114	0.00123477	0.00134998	0.00145631	0.00135086	0.00131035	0.00148084	0.00139649	0.00130344	0.00143075	0.00146653	0.00129646	0.542044	0.655469	-3.02003
K11184	0.000183495	0.000125623	0.000109224	0.000132035	0.000127438	0.000166819	0.000103421	0.000152306	0.000134998	0.000107701	8.87e-05	0.000119123	0.000177514	7.29e-05	0.000207736	5.67e-05	0.000182715	0.000112479	0.541692	0.655358	0.510214
K10117	0.00052073	0.000416539	0.000496059	0.000630361	0.000623538	0.000453404	0.000580491	0.00066906	0.000550938	0.000505727	0.000586687	0.000652338	0.000471813	0.000673961	0.000586548	0.000567258	0.000557762	0.000538713	0.541155	0.654871	-1.20107
K19507	1.49e-05	6.61e-06	4.55e-06	1.28e-05	0	4.28e-06	1e-05	1.09e-05	1.09e-05	4.68e-06	4.93e-06	5.67e-06	1.4e-05	0	1.63e-05	0	9.62e-06	5.92e-06	0.540844	0.654657	0.234562
K07267	4.96e-06	3.31e-06	1.82e-05	0	4.55e-06	4.28e-06	6.67e-06	5.44e-06	7.3e-06	0	9.86e-06	5.67e-06	0	3.04e-05	0	1.26e-05	4.81e-06	1.18e-05	0.540395	0.654275	-0.151761
K00401	4.96e-06	6.61e-06	4.55e-06	4.26e-06	4.55e-06	8.55e-06	1e-05	1.09e-05	7.3e-06	4.68e-06	9.86e-06	1.13e-05	4.67e-06	6.07e-06	4.07e-06	1.26e-05	4.81e-06	1.18e-05	0.539425	0.653262	-0.385785
K18198	4.96e-06	6.61e-06	4.55e-06	0	4.55e-06	1.28e-05	3.34e-06	0	3.65e-06	0	9.86e-06	5.67e-06	4.67e-06	0	4.07e-06	6.3e-06	0	0	0.538197	0.651936	0.173333
K21949	0	0	0	0	0	4.28e-06	0	0	0	0	0	0	0	0	4.07e-06	0	4.81e-06	0	0.536879	0.6505	-0.0694887
K02931	0.00127455	0.0011835	0.00119236	0.0011585	0.00119246	0.00114207	0.00114097	0.0010607	0.00111282	0.00122217	0.00117337	0.00116286	0.00121924	0.00126292	0.00106719	0.00115973	0.00114437	0.00120174	0.536248	0.649897	-3.29775
K14981	0	0	4.55e-06	0	4.55e-06	0	3.34e-06	0	3.65e-06	0	4.93e-06	0	0	6.07e-06	0	6.3e-06	0	5.92e-06	0.536247	0.649897	-0.134326
K08358	0	3.31e-06	0	8.52e-06	4.55e-06	4.28e-06	3.34e-06	5.44e-06	3.65e-06	4.68e-06	0	0	9.34e-06	0	0	0	4.81e-06	5.92e-06	0.535591	0.649422	0.169507
K07161	5.95e-05	3.64e-05	7.74e-05	6.81e-05	5.92e-05	5.56e-05	6.34e-05	5.98e-05	3.28e-05	5.62e-05	6.9e-05	4.54e-05	3.27e-05	4.25e-05	6.52e-05	3.78e-05	7.21e-05	5.33e-05	0.535553	0.649422	0.634565
K09937	4.96e-06	3.31e-06	0	0	0	4.28e-06	3.34e-06	1.09e-05	3.65e-06	4.68e-06	0	0	0	6.07e-06	0	6.3e-06	4.81e-06	0	0.534906	0.648913	0.149479
K22226	9.92e-06	1.65e-05	4.55e-06	8.52e-06	9.1e-06	4.28e-06	6.67e-06	2.18e-05	1.09e-05	9.37e-06	9.86e-06	1.13e-05	4.67e-06	1.82e-05	8.15e-06	2.52e-05	9.62e-06	1.18e-05	0.533597	0.647485	-0.310468
K09721	4.96e-06	1.32e-05	9.1e-06	4.26e-06	4.55e-06	8.55e-06	1e-05	1.09e-05	1.46e-05	9.37e-06	9.86e-06	1.7e-05	4.67e-06	1.21e-05	4.07e-06	1.26e-05	4.81e-06	1.78e-05	0.532989	0.646909	-0.350904
K08738	4.96e-06	0	0	4.26e-06	4.55e-06	0	3.34e-06	1.09e-05	3.65e-06	9.37e-06	4.93e-06	0	4.67e-06	1.21e-05	0	6.3e-06	4.81e-06	0	0.531787	0.64561	-0.174733
K16214	2.48e-05	3.31e-06	1.37e-05	0	1.37e-05	2.14e-05	1.33e-05	5.44e-06	2.19e-05	2.81e-05	1.97e-05	5.67e-06	0	1.21e-05	0	6.3e-06	9.62e-06	1.18e-05	0.530211	0.643856	0.217998
K00850	0.000763737	0.000829771	0.000791874	0.000792211	0.000755528	0.000787041	0.000783997	0.000854003	0.000868366	0.000819465	0.000828264	0.000816841	0.000798812	0.000680033	0.000822797	0.000680709	0.000884726	0.000739991	0.530184	0.643856	2.31582
K02914	0.000644713	0.000654561	0.000614385	0.000660176	0.000628089	0.00073999	0.000617189	0.00066906	0.00059837	0.000641524	0.000680359	0.000675028	0.000696041	0.000649674	0.000659867	0.000636589	0.000596228	0.000692631	0.529196	0.642942	-2.92171
K03236	4.96e-06	1.32e-05	1.37e-05	8.52e-06	4.55e-06	8.55e-06	1e-05	1.09e-05	1.82e-05	9.37e-06	1.48e-05	1.13e-05	4.67e-06	2.43e-05	4.07e-06	1.26e-05	4.81e-06	2.37e-05	0.528739	0.642547	-0.299755
K07661	0	3.31e-06	4.55e-06	0	0	4.28e-06	0	5.44e-06	3.65e-06	9.37e-06	0	5.67e-06	0	0	0	0	9.62e-06	5.92e-06	0.527694	0.641436	-0.140679
K21021	0	0	0	0	0	1.28e-05	0	0	0	4.68e-06	0	5.67e-06	4.67e-06	0	8.15e-06	0	0	0	0.526735	0.640429	-0.0884669
K14392	1.49e-05	1.98e-05	2.28e-05	3.41e-05	2.73e-05	2.14e-05	1.33e-05	2.72e-05	1.09e-05	1.87e-05	1.48e-05	1.7e-05	2.34e-05	3.64e-05	2.85e-05	3.15e-05	2.4e-05	1.78e-05	0.526272	0.640025	-0.505959
K01712	0.000109105	0.000112399	0.000109224	9.37e-05	8.65e-05	9.84e-05	0.000100085	0.000141427	9.85e-05	0.000103018	0.000113393	7.94e-05	0.000121457	0.000103219	9.37e-05	8.82e-05	0.000100974	0.000106559	0.526191	0.640025	1.20607
K13014	0	0	4.55e-06	0	0	0	3.34e-06	0	3.65e-06	0	0	0	0	6.07e-06	0	0	0	0	0.525515	0.639423	0.0825884
K00320	0	3.31e-06	9.1e-06	0	0	0	3.34e-06	0	3.65e-06	0	0	5.67e-06	0	0	0	0	0	5.92e-06	0.525501	0.639423	0.1018
K02910	4.96e-06	1.32e-05	9.1e-06	4.26e-06	4.55e-06	4.28e-06	1.33e-05	1.09e-05	1.46e-05	9.37e-06	9.86e-06	1.7e-05	4.67e-06	1.82e-05	4.07e-06	1.26e-05	4.81e-06	1.18e-05	0.524854	0.638936	-0.333653
K03532	9.92e-06	6.61e-06	9.1e-06	8.52e-06	9.1e-06	4.28e-06	6.67e-06	1.09e-05	3.65e-06	1.4e-05	0	0	1.4e-05	1.21e-05	8.15e-06	1.26e-05	1.44e-05	5.92e-06	0.524584	0.638766	-0.311037
K01170	4.96e-06	1.32e-05	9.1e-06	4.26e-06	4.55e-06	4.28e-06	1.33e-05	1.09e-05	1.46e-05	9.37e-06	9.86e-06	1.7e-05	4.67e-06	1.21e-05	4.07e-06	1.89e-05	4.81e-06	1.18e-05	0.523932	0.638131	-0.330515
K05524	2.98e-05	2.98e-05	2.28e-05	1.28e-05	1.82e-05	8.55e-06	1e-05	1.63e-05	2.19e-05	1.4e-05	1.97e-05	5.67e-06	9.34e-06	2.43e-05	2.04e-05	1.89e-05	1.44e-05	2.37e-05	0.523791	0.638118	0.420024
K07115	2.48e-05	9.92e-06	3.64e-05	1.28e-05	1.82e-05	1.71e-05	2.67e-05	1.63e-05	2.55e-05	9.37e-06	2.96e-05	1.7e-05	4.67e-06	3.04e-05	1.22e-05	3.15e-05	9.62e-06	1.78e-05	0.523788	0.638118	0.35406
K14983	9.92e-06	1.32e-05	9.1e-06	8.52e-06	1.37e-05	2.57e-05	1.33e-05	1.09e-05	1.09e-05	2.34e-05	2.47e-05	5.67e-06	1.87e-05	1.21e-05	8.15e-06	1.26e-05	4.81e-06	2.37e-05	0.523199	0.637715	-0.347516
K03316	1.49e-05	3.31e-06	9.1e-06	1.7e-05	1.82e-05	4.28e-06	1.33e-05	0	1.82e-05	1.4e-05	1.97e-05	1.7e-05	1.4e-05	1.21e-05	0	1.26e-05	1.44e-05	1.18e-05	0.523178	0.637715	-0.320532
K06182	0.000153739	0.000161987	0.000141081	0.000174627	0.000191158	0.00019676	0.000156799	0.000217581	0.000175133	0.000107701	0.000133114	0.000153158	0.000214885	0.000151793	0.000264761	0.000119754	0.000192332	0.000118399	0.522805	0.637551	0.695798
K10747	3.97e-05	5.29e-05	6.37e-05	4.69e-05	5.46e-05	5.99e-05	8.34e-05	3.81e-05	7.66e-05	7.96e-05	4.44e-05	5.67e-05	4.67e-05	0.000109291	4.07e-05	0.000100846	3.85e-05	5.92e-05	0.522511	0.637351	-0.472421
K02013	0.000867883	0.000895888	0.000928404	0.000971097	0.000832901	0.000945305	0.000957477	0.00109878	0.000959581	0.000870974	0.000995888	0.000930291	0.000887568	0.00122042	0.000977581	0.00121645	0.000855876	0.00082879	0.52154	0.636326	-1.38042
K03105	4.96e-06	1.32e-05	9.1e-06	4.26e-06	4.55e-06	8.55e-06	1.33e-05	1.09e-05	1.09e-05	4.68e-06	9.86e-06	1.7e-05	4.67e-06	1.82e-05	4.07e-06	1.26e-05	4.81e-06	1.78e-05	0.521153	0.636012	-0.325106
K04484	4.96e-06	1.32e-05	9.1e-06	4.26e-06	4.55e-06	8.55e-06	1.33e-05	1.09e-05	1.09e-05	4.68e-06	9.86e-06	1.7e-05	4.67e-06	1.82e-05	4.07e-06	1.26e-05	4.81e-06	1.78e-05	0.521153	0.636012	-0.325106
K12507	9.92e-06	0	0	4.26e-06	0	0	3.34e-06	1.63e-05	7.3e-06	0	9.86e-06	0	4.67e-06	0	8.15e-06	0	4.81e-06	0	0.520987	0.636012	0.131941
K06285	2.98e-05	2.64e-05	2.28e-05	1.7e-05	1.37e-05	2.57e-05	1.67e-05	2.18e-05	1.09e-05	2.34e-05	4.93e-06	0	1.87e-05	1.82e-05	2.85e-05	1.26e-05	4.33e-05	5.92e-06	0.520972	0.636012	0.305015
K07056	0.00126463	0.00123309	0.00126063	0.00126072	0.00130624	0.00122761	0.00120102	0.00120213	0.00124782	0.00118003	0.00124733	0.00128199	0.00126595	0.00123256	0.00121383	0.00124166	0.00122131	0.00123135	0.520285	0.635587	6.67828
K02538	0	3.31e-06	0	0	4.55e-06	4.28e-06	0	0	0	0	0	0	4.67e-06	6.07e-06	0	0	9.62e-06	0	0.519925	0.635305	-0.104156
K07795	4.96e-06	6.61e-06	9.1e-06	8.52e-06	4.55e-06	8.55e-06	1e-05	1.09e-05	7.3e-06	1.4e-05	4.93e-06	0	9.34e-06	6.07e-06	4.07e-06	0	9.62e-06	1.18e-05	0.519192	0.634568	0.32317
K00400	4.96e-06	1.65e-05	9.1e-06	4.26e-06	4.55e-06	8.55e-06	1.33e-05	1.09e-05	1.09e-05	9.37e-06	9.86e-06	2.27e-05	4.67e-06	1.21e-05	4.07e-06	1.26e-05	4.81e-06	1.78e-05	0.51899	0.63448	-0.320138
K01497	9.92e-06	6.61e-06	1.82e-05	4.26e-06	4.55e-06	8.55e-06	3.34e-06	0	1.09e-05	9.37e-06	0	1.13e-05	0	1.21e-05	8.15e-06	6.3e-06	4.81e-06	0	0.518383	0.633896	0.219636
K07307	3.97e-05	4.63e-05	3.64e-05	3.41e-05	1.37e-05	3.42e-05	2.67e-05	4.9e-05	2.19e-05	6.56e-05	5.42e-05	2.84e-05	2.34e-05	2.43e-05	1.63e-05	4.41e-05	4.33e-05	4.14e-05	0.517688	0.633205	-0.438938
K03656	4.96e-06	0	1.82e-05	4.26e-06	4.55e-06	4.28e-06	3.34e-06	5.44e-06	3.65e-06	4.68e-06	0	5.67e-06	0	6.07e-06	4.07e-06	6.3e-06	4.81e-06	5.92e-06	0.517457	0.63308	0.20586
K04021	0	6.61e-06	9.1e-06	0	0	0	3.34e-06	5.44e-06	0	4.68e-06	4.93e-06	5.67e-06	0	6.07e-06	0	6.3e-06	0	5.92e-06	0.515037	0.630276	-0.172371
K02838	0.0011704	0.00119672	0.00123332	0.00117128	0.00120156	0.00116773	0.00113763	0.00107702	0.00112742	0.00112384	0.00117337	0.00112316	0.0011772	0.00104434	0.00107534	0.00115973	0.00113957	0.00129646	0.514697	0.630018	3.30115
K05982	9.92e-06	2.64e-05	1.37e-05	2.56e-05	2.73e-05	2.99e-05	1.67e-05	1.09e-05	7.3e-06	1.4e-05	1.97e-05	1.13e-05	4.67e-06	2.43e-05	2.04e-05	2.52e-05	1.44e-05	1.18e-05	0.514578	0.630018	0.38583
K02892	0.00124479	0.0013521	0.00124697	0.00121813	0.00132445	0.00126183	0.00123104	0.00118037	0.00127336	0.00127837	0.001341	0.00120824	0.00125661	0.00125077	0.00113236	0.00122906	0.00120688	0.00127278	0.513576	0.62896	3.89207
K20480	0	6.61e-06	0	4.26e-06	0	0	3.34e-06	0	0	0	0	0	0	6.07e-06	0	1.26e-05	0	5.92e-06	0.513069	0.628497	-0.101698
K02798	2.48e-05	1.65e-05	2.28e-05	2.13e-05	1.82e-05	2.14e-05	6.67e-06	4.35e-05	1.46e-05	4.68e-06	1.48e-05	2.84e-05	4.67e-06	1.82e-05	4.07e-05	6.3e-06	9.62e-06	2.96e-05	0.512011	0.627358	0.28904
K09973	7.44e-05	5.29e-05	5.92e-05	4.69e-05	7.28e-05	7.7e-05	5.34e-05	9.79e-05	4.38e-05	3.75e-05	4.44e-05	7.37e-05	5.61e-05	7.89e-05	5.7e-05	8.19e-05	4.81e-05	5.33e-05	0.511897	0.627358	0.640163
K13926	0	3.31e-06	0	0	0	0	3.34e-06	0	3.65e-06	0	0	0	4.67e-06	6.07e-06	0	6.3e-06	0	0	0.51189	0.627358	-0.110972
K09955	0.000411625	0.000446291	0.000414141	0.000391846	0.000436932	0.000393521	0.00046039	0.000527633	0.000529046	0.000435487	0.000404271	0.000510525	0.000378384	0.000364303	0.000529523	0.000390778	0.000476021	0.000355196	0.511623	0.627353	1.28902
K07158	4.96e-06	1.32e-05	4.55e-06	4.26e-06	4.55e-06	8.55e-06	1e-05	1.09e-05	7.3e-06	9.37e-06	4.93e-06	1.7e-05	4.67e-06	1.21e-05	4.07e-06	6.3e-06	4.81e-06	1.78e-05	0.5111	0.626869	-0.320821
K11066	9.92e-06	9.92e-06	0	4.26e-06	4.55e-06	4.28e-06	1.33e-05	1.09e-05	1.09e-05	4.68e-06	1.48e-05	5.67e-06	4.67e-06	6.07e-06	4.07e-06	6.3e-06	4.81e-06	5.92e-06	0.510876	0.626751	0.311272
K18991	0	6.61e-06	0	4.26e-06	4.55e-06	0	0	5.44e-06	0	0	0	0	4.67e-06	0	4.07e-06	0	4.81e-06	0	0.510604	0.626575	0.129553
K09730	4.96e-06	9.92e-06	4.55e-06	4.26e-06	4.55e-06	4.28e-06	6.67e-06	1.09e-05	1.82e-05	4.68e-06	9.86e-06	1.13e-05	4.67e-06	1.21e-05	4.07e-06	1.26e-05	4.81e-06	1.78e-05	0.510254	0.626302	-0.304413
K18197	5.95e-05	6.28e-05	6.37e-05	6.81e-05	7.74e-05	5.56e-05	5e-05	8.7e-05	5.84e-05	2.34e-05	4.93e-05	3.97e-05	4.2e-05	0.000133578	6.52e-05	9.45e-05	3.37e-05	2.37e-05	0.510048	0.626207	0.387616
K00413	0	3.31e-06	4.55e-06	4.26e-06	4.55e-06	0	6.67e-06	0	3.65e-06	9.37e-06	0	0	4.67e-06	6.07e-06	4.07e-06	6.3e-06	4.81e-06	0	0.510006	0.626207	-0.207092
K02614	0.000168617	0.000221493	0.000200244	0.000174627	0.00013199	0.00019676	0.000213514	0.000168625	0.000189727	0.000187306	0.000172555	0.000198538	0.000168171	0.000151793	0.000183296	0.000182783	0.000153865	0.000201278	0.508988	0.625219	1.37162
K03051	4.96e-06	9.92e-06	1.37e-05	4.26e-06	4.55e-06	8.55e-06	1.67e-05	1.09e-05	1.09e-05	4.68e-06	4.93e-06	1.7e-05	4.67e-06	6.07e-06	4.07e-06	6.3e-06	4.81e-06	1.78e-05	0.508783	0.625123	0.304457
K14059	0.000109105	7.27e-05	5.46e-05	5.11e-05	0.000104682	0.000102658	8.67e-05	4.9e-05	6.57e-05	9.37e-05	8.87e-05	6.81e-05	4.2e-05	7.29e-05	5.3e-05	8.19e-05	8.17e-05	5.33e-05	0.508023	0.624347	0.60858
K03497	0.00242511	0.00255874	0.00236652	0.0025683	0.00251691	0.00255788	0.00232864	0.00237707	0.00235699	0.00258014	0.00237633	0.00246187	0.00251789	0.00217975	0.00231361	0.00232576	0.00253397	0.00243901	0.507719	0.62413	3.72547
K19810	0	6.61e-06	9.1e-06	4.26e-06	4.55e-06	4.28e-06	3.34e-06	5.44e-06	3.65e-06	0	4.93e-06	5.67e-06	4.67e-06	6.07e-06	0	6.3e-06	0	5.92e-06	0.507106	0.623533	0.272771
K20450	0	0	4.55e-06	4.26e-06	0	4.28e-06	3.34e-06	0	3.65e-06	4.68e-06	4.93e-06	0	0	0	4.07e-06	0	0	0	0.506453	0.622886	0.148009
K18195	9.92e-06	3.31e-06	4.55e-06	4.26e-06	4.55e-06	1.28e-05	0	2.18e-05	0	4.68e-06	9.86e-06	5.67e-06	4.67e-06	6.07e-06	8.15e-06	6.3e-06	0	0	0.506096	0.622604	0.189722
K22318	4.96e-06	6.61e-06	4.55e-06	4.26e-06	4.55e-06	0	6.67e-06	5.44e-06	3.65e-06	4.68e-06	4.93e-06	5.67e-06	4.67e-06	1.21e-05	0	1.26e-05	0	5.92e-06	0.506084	0.622604	-0.259616
K02303	4.96e-06	1.32e-05	2.28e-05	8.52e-06	4.55e-06	8.55e-06	1.67e-05	1.09e-05	1.09e-05	4.68e-06	9.86e-06	1.7e-05	9.34e-06	1.21e-05	4.07e-06	1.26e-05	4.81e-06	1.18e-05	0.504655	0.621143	0.357655
K02086	4.96e-05	7.6e-05	8.19e-05	6.39e-05	7.74e-05	5.56e-05	5.67e-05	4.9e-05	6.57e-05	7.02e-05	6.9e-05	7.94e-05	8.88e-05	7.29e-05	2.44e-05	8.19e-05	3.37e-05	0.000118399	0.504053	0.620559	-0.547828
K19166	2.48e-05	2.98e-05	3.19e-05	2.56e-05	4.1e-05	3.42e-05	2.34e-05	3.81e-05	1.82e-05	4.68e-06	3.45e-05	5.67e-06	2.8e-05	4.25e-05	2.44e-05	5.67e-05	1.44e-05	1.78e-05	0.503903	0.620529	0.366947
K03322	3.47e-05	2.98e-05	2.28e-05	1.7e-05	2.28e-05	1.71e-05	1.67e-05	3.26e-05	2.55e-05	1.87e-05	2.96e-05	2.27e-05	1.4e-05	3.64e-05	2.44e-05	4.41e-05	2.88e-05	2.37e-05	0.503875	0.620529	-0.559899
K03422	4.96e-06	6.61e-06	1.37e-05	4.26e-06	4.55e-06	8.55e-06	1e-05	1.09e-05	7.3e-06	9.37e-06	9.86e-06	1.13e-05	4.67e-06	1.21e-05	4.07e-06	1.26e-05	4.81e-06	1.18e-05	0.502781	0.61946	-0.443192
K07246	9.92e-06	1.98e-05	1.82e-05	1.28e-05	4.55e-06	1.28e-05	1.67e-05	1.09e-05	1.46e-05	9.37e-06	2.47e-05	1.7e-05	1.4e-05	2.43e-05	1.22e-05	1.26e-05	9.62e-06	1.18e-05	0.502735	0.61946	-0.476737
K17195	4.96e-06	1.98e-05	1.82e-05	2.13e-05	1.37e-05	8.55e-06	1e-05	5.44e-06	1.46e-05	1.4e-05	9.86e-06	1.13e-05	4.67e-06	1.82e-05	1.22e-05	1.89e-05	4.81e-06	5.92e-06	0.502466	0.619383	0.370591
K00075	0.00102162	0.00108763	0.00103763	0.00102647	0.00105592	0.00102658	0.000987503	0.000941036	0.00101066	0.00103487	0.00105505	0.00110047	0.00106041	0.000977547	0.00102239	0.000983247	0.00102897	0.00104783	0.502404	0.619383	-4.5712
K00566	0.00108113	0.00111738	0.00109224	0.00103924	0.00108778	0.00110785	0.0011076	0.000989991	0.00107999	0.00112852	0.00106491	0.00106643	0.00106975	0.00109291	0.00106719	0.00107779	0.00107225	0.00117807	0.501548	0.618563	-4.88842
K08317	1.49e-05	0	4.55e-06	0	4.55e-06	0	3.34e-06	0	7.3e-06	4.68e-06	4.93e-06	0	0	0	0	0	0	1.18e-05	0.501536	0.618563	0.121605
K00754	4.96e-05	1.98e-05	5.01e-05	8.52e-06	1.82e-05	1.71e-05	1e-05	2.72e-05	1.82e-05	2.81e-05	1.48e-05	1.7e-05	1.87e-05	6.07e-06	4.48e-05	1.89e-05	1.92e-05	1.18e-05	0.500423	0.617486	0.291876
K02291	4.96e-06	0	1.37e-05	4.26e-06	4.55e-06	0	6.67e-06	0	3.65e-06	0	4.93e-06	5.67e-06	4.67e-06	1.21e-05	0	1.26e-05	4.81e-06	5.92e-06	0.496728	0.613082	-0.201137
K01485	2.98e-05	1.98e-05	1.82e-05	2.13e-05	2.28e-05	2.99e-05	2.67e-05	2.18e-05	2.55e-05	1.4e-05	4.93e-06	2.84e-05	9.34e-06	2.43e-05	1.22e-05	3.15e-05	1.44e-05	4.74e-05	0.496503	0.612959	0.40288
K02385	9.42e-05	9.26e-05	7.28e-05	9.8e-05	0.000118336	0.000136877	0.00013011	0.000141427	0.000145944	7.96e-05	8.87e-05	0.000102105	9.81e-05	9.71e-05	0.00017515	0.00013236	9.62e-05	7.7e-05	0.496329	0.612899	0.691936
K01113	0	3.31e-06	0	4.26e-06	4.55e-06	0	3.34e-06	5.44e-06	3.65e-06	4.68e-06	0	0	0	6.07e-06	0	6.3e-06	0	0	0.496068	0.61273	0.163256
K01678	0.000451299	0.000492573	0.000391386	0.000451475	0.000405072	0.000461959	0.000463726	0.000489556	0.000477966	0.000412074	0.000483154	0.0004538	0.000485827	0.000394662	0.000521376	0.000390778	0.000432746	0.000384795	0.495728	0.612465	1.88501
K11691	9.92e-06	1.98e-05	4.55e-06	2.56e-05	1.37e-05	8.55e-06	1e-05	0	7.3e-06	1.4e-05	2.47e-05	1.7e-05	9.34e-06	1.82e-05	8.15e-06	1.89e-05	4.81e-06	5.92e-06	0.49499	0.611709	-0.301863
K03086	0.00182999	0.00159012	0.00169752	0.0015759	0.00174773	0.00156125	0.00168476	0.00156114	0.00171849	0.00163893	0.0017502	0.00166772	0.00169572	0.0017183	0.00159672	0.00173959	0.00174541	0.00164574	0.494031	0.610677	-3.87244
K20922	1.49e-05	6.61e-06	4.55e-06	1.28e-05	1.37e-05	4.28e-06	1.33e-05	5.44e-06	1.09e-05	4.68e-06	9.86e-06	1.13e-05	4.67e-06	1.21e-05	4.07e-06	1.26e-05	9.62e-06	5.92e-06	0.493878	0.610642	0.411258
K03629	0.00110097	0.00111077	0.00107859	0.00109036	0.00109688	0.00113351	0.00104088	0.000979112	0.0010508	0.00113788	0.00109449	0.00108912	0.00109778	0.00112934	0.00103868	0.00105258	0.00103859	0.00113071	0.493235	0.610001	-4.56476
K03723	0.000778615	0.000760348	0.000778221	0.000762396	0.000819247	0.000748545	0.000730619	0.000696258	0.000685936	0.0008101	0.000729661	0.000765788	0.000784797	0.000771108	0.000716893	0.000731132	0.000745285	0.00082287	0.493229	0.610001	-3.46226
K00814	4.96e-06	3.31e-06	4.55e-06	0	0	0	3.34e-06	1.09e-05	3.65e-06	4.68e-06	4.93e-06	5.67e-06	0	0	0	1.89e-05	4.81e-06	5.92e-06	0.493176	0.610001	-0.158824
K04096	0.00103154	0.00102151	0.00100122	0.00105202	0.00107868	0.00108218	0.00101419	0.00089208	0.00100336	0.00111915	0.00115365	0.00101538	0.00105574	0.000983619	0.000973508	0.000939127	0.0010434	0.00108335	0.492709	0.609813	-2.91486
K02962	4.96e-06	1.65e-05	4.55e-06	8.52e-06	9.1e-06	8.55e-06	1e-05	1.09e-05	1.46e-05	4.68e-06	9.86e-06	1.7e-05	4.67e-06	1.82e-05	4.07e-06	1.89e-05	4.81e-06	2.37e-05	0.49263	0.609813	-0.317816
K11076	4.96e-06	6.61e-06	9.1e-06	8.52e-06	9.1e-06	8.55e-06	0	5.44e-06	0	4.68e-06	0	5.67e-06	0	1.21e-05	4.07e-06	1.26e-05	0	0	0.491997	0.609239	0.208253
K12506	0.000143821	0.000185128	0.00018204	0.000149072	0.000150195	0.000128322	0.000153463	0.000163185	0.000167835	0.000173258	0.000162695	0.000187193	0.000121457	0.000163936	0.000101831	0.000151269	0.000125016	0.000165758	0.491953	0.609239	1.17821
K00840	0	0	0	0	0	0	0	5.44e-06	0	0	0	0	0	6.07e-06	0	6.3e-06	0	0	0.490822	0.608092	-0.0774728
K07487	1.49e-05	6.61e-06	1.82e-05	1.7e-05	2.28e-05	1.28e-05	1.33e-05	5.44e-06	1.46e-05	9.37e-06	1.97e-05	1.7e-05	1.87e-05	1.21e-05	1.22e-05	2.52e-05	9.62e-06	1.78e-05	0.490251	0.607539	-0.503738
K02568	4.96e-06	6.61e-06	9.1e-06	8.52e-06	9.1e-06	8.55e-06	1e-05	1.09e-05	1.46e-05	1.4e-05	4.93e-06	5.67e-06	4.67e-06	6.07e-06	8.15e-06	1.26e-05	1.44e-05	0	0.48982	0.607159	0.390556
K01623	9.92e-06	1.32e-05	1.37e-05	1.7e-05	2.28e-05	4.28e-05	1.33e-05	5.44e-06	2.55e-05	3.75e-05	2.47e-05	1.7e-05	2.34e-05	2.43e-05	0	3.15e-05	9.62e-06	2.96e-05	0.489301	0.606669	-0.322917
K19424	0.000119024	8.93e-05	0.000113775	0.000114998	0.000122887	8.13e-05	0.000120102	0.000103351	0.000113106	0.000121749	0.000118323	0.000124795	0.000102771	9.71e-05	0.000101831	9.45e-05	0.000129824	0.000130238	0.489277	0.606669	-1.40186
K19056	0	6.61e-06	4.55e-06	0	0	0	0	0	0	0	0	0	0	0	0	0	4.81e-06	0	0.487985	0.605343	0.0767956
K01056	0.00126959	0.00128929	0.00121057	0.00120961	0.00118336	0.00126183	0.00127108	0.0011151	0.00123323	0.00128305	0.00128677	0.00127064	0.0012753	0.00122042	0.00112829	0.00119754	0.00124535	0.00130238	0.486947	0.60421	-4.11048
K19068	0.000257885	0.000224799	0.000232101	0.000217219	0.000268531	0.000278031	0.000233531	0.000239339	0.000269996	0.000252863	0.000246507	0.000266608	0.000266271	0.000224654	0.000256615	0.000189086	0.000307731	0.000301916	0.48684	0.60421	-1.53225
K03557	0	0	4.55e-06	4.26e-06	0	0	0	5.44e-06	3.65e-06	4.68e-06	0	0	4.67e-06	6.07e-06	4.07e-06	6.3e-06	0	0	0.486559	0.604034	-0.170181
K09165	1.49e-05	9.92e-06	1.82e-05	3.41e-05	3.64e-05	3.42e-05	2.34e-05	0	1.09e-05	9.37e-06	3.45e-05	1.7e-05	9.34e-06	1.82e-05	1.22e-05	1.26e-05	4.81e-06	2.96e-05	0.485719	0.603145	0.295619
K14982	9.92e-06	6.61e-06	9.1e-06	8.52e-06	1.82e-05	2.99e-05	1e-05	5.44e-06	1.09e-05	2.34e-05	1.97e-05	1.13e-05	1.87e-05	1.21e-05	4.07e-06	1.26e-05	9.62e-06	1.78e-05	0.485703	0.603145	-0.354545
K15874	0	0	0	0	0	4.28e-06	0	0	0	0	0	0	0	0	4.07e-06	0	0	5.92e-06	0.485349	0.60299	-0.0772264
K03059	0	0	0	0	0	4.28e-06	6.67e-06	5.44e-06	3.65e-06	0	4.93e-06	5.67e-06	0	6.07e-06	0	6.3e-06	0	5.92e-06	0.485253	0.60299	-0.170921
K05520	1.98e-05	1.98e-05	1.82e-05	2.13e-05	1.82e-05	2.57e-05	1.33e-05	2.18e-05	2.19e-05	1.87e-05	1.48e-05	2.84e-05	1.4e-05	3.64e-05	1.63e-05	3.78e-05	2.4e-05	1.18e-05	0.484615	0.602385	-0.533767
K01815	0.00022317	0.000234716	0.000209346	0.000234256	0.000259428	0.000205315	0.000233531	0.000320931	0.000226213	0.000154528	0.000226786	0.0002269	0.000252256	0.00021251	0.000289201	0.000258417	0.000201948	0.000213117	0.483714	0.601418	1.17043
K00605	0.000233089	0.000201658	0.000241203	0.000178886	0.000159298	0.000162541	0.000213514	0.000250218	0.000229862	0.000220085	0.000241577	0.000232573	0.000172842	0.00024894	0.000158857	0.000271023	0.000182715	0.000254557	0.482921	0.600584	-1.0663
K11312	9.92e-06	9.92e-06	9.1e-06	0	0	0	0	5.44e-06	7.3e-06	0	4.93e-06	0	0	1.21e-05	0	6.3e-06	4.81e-06	0	0.48238	0.600063	0.161489
K01621	9.42e-05	7.93e-05	5.01e-05	8.52e-05	9.1e-05	7.7e-05	8.01e-05	5.98e-05	9.12e-05	8.43e-05	9.86e-05	7.37e-05	8.41e-05	0.000115363	4.89e-05	0.000126057	3.37e-05	0.000118399	0.482009	0.599754	-0.621817
K08280	4.96e-06	9.92e-06	4.55e-06	1.28e-05	1.37e-05	8.55e-06	1e-05	1.09e-05	1.46e-05	9.37e-06	0	5.67e-06	9.34e-06	6.07e-06	1.22e-05	0	2.4e-05	5.92e-06	0.481802	0.59965	0.293156
K03791	0	3.31e-06	4.55e-06	0	4.55e-06	4.28e-06	3.34e-06	1.63e-05	7.3e-06	4.68e-06	4.93e-06	5.67e-06	0	2.43e-05	0	1.26e-05	4.81e-06	5.92e-06	0.481226	0.599084	-0.173956
K05567	9.92e-05	0.000119011	0.000122877	0.00016185	0.000118336	0.000132599	0.000126774	0.000163185	0.000145944	9.83e-05	0.000128184	0.00013614	0.000149485	0.000127506	0.000138491	0.000126057	0.000110591	0.000118399	0.481207	0.599084	1.29156
K05942	0.000138861	0.000201658	0.000191142	0.00021296	0.000154747	0.000209592	0.000210178	0.000212141	0.000197024	0.000206037	0.000167625	0.00020421	0.000182185	0.000151793	0.000228102	0.000170177	0.000192332	0.000142078	0.480759	0.598809	1.27023
K03439	0.000996826	0.00100168	0.00095571	0.000975356	0.00100585	0.00105224	0.00093746	0.000957354	0.00100336	0.0011332	0.00101068	0.000930291	0.00104173	0.000971475	0.000981654	0.00098955	0.00104821	0.000935348	0.480754	0.598809	-3.61861
K20939	0	0	0	4.26e-06	4.55e-06	0	3.34e-06	0	0	0	9.86e-06	5.67e-06	0	0	0	0	0	5.92e-06	0.479854	0.597985	-0.114436
K03315	0.000188455	0.00024794	0.000236652	0.00016185	0.00013199	0.000162541	0.000226859	0.00022846	0.000218916	0.000248181	0.000192275	0.00024959	0.000210214	0.000206438	0.000207736	0.0002206	0.000187523	0.000183518	0.479618	0.597843	-1.14857
K03703	0.000853005	0.000922335	0.000878343	0.000890172	0.000905723	0.000902531	0.000890754	0.000864883	0.000850123	0.000941214	0.000912076	0.000805496	0.000878226	0.00081361	0.000855383	0.00085719	0.000855876	0.000923509	0.479589	0.597843	4.34612
K03567	9.92e-06	9.92e-06	9.1e-06	4.26e-06	4.55e-06	4.28e-06	3.34e-06	1.63e-05	3.65e-06	4.68e-06	0	5.67e-06	9.34e-06	6.07e-06	4.07e-06	1.26e-05	4.81e-06	5.92e-06	0.479324	0.597781	0.309348
K17950	0	3.31e-06	4.55e-06	4.26e-06	0	0	6.67e-06	0	0	0	4.93e-06	0	0	6.07e-06	0	0	0	0	0.479233	0.597781	0.121464
K06401	9.92e-06	2.31e-05	1.82e-05	1.28e-05	1.37e-05	4.28e-06	1.33e-05	1.09e-05	1.09e-05	9.37e-06	1.48e-05	2.27e-05	9.34e-06	3.04e-05	0	2.52e-05	0	3.55e-05	0.478685	0.597288	-0.27868
K17248	4.96e-06	0	1.82e-05	4.26e-06	9.1e-06	4.28e-06	3.34e-06	1.09e-05	3.65e-06	4.68e-06	0	0	4.67e-06	1.21e-05	4.07e-06	1.26e-05	4.81e-06	0	0.478641	0.597288	0.205347
K10120	1.49e-05	9.92e-06	9.1e-06	2.98e-05	4.1e-05	3.42e-05	2.67e-05	1.63e-05	1.46e-05	2.81e-05	4.93e-06	2.84e-05	1.87e-05	1.21e-05	2.44e-05	1.26e-05	2.88e-05	5.92e-06	0.478577	0.597288	0.352565
K20527	2.48e-05	2.31e-05	4.1e-05	1.7e-05	1.37e-05	3.42e-05	2e-05	3.26e-05	2.19e-05	1.4e-05	3.45e-05	1.7e-05	9.34e-06	3.64e-05	1.63e-05	3.78e-05	1.44e-05	1.78e-05	0.478576	0.597288	0.441012
K05570	0.000109105	0.000128929	0.000113775	0.000132035	0.00010013	0.000128322	0.000133446	0.000130548	0.000127701	0.000117066	0.000138044	0.000141813	0.000172842	0.000115363	0.000142564	0.000107149	0.000110591	0.000112479	0.478284	0.597288	-1.33808
K01744	0.000128943	0.000142152	0.000141081	0.00010648	9.56e-05	0.00011549	0.000143455	0.000125109	0.000145944	0.000121749	0.000133114	0.000124795	9.81e-05	0.000133578	8.96e-05	0.000151269	0.000110591	0.000124318	0.476881	0.595797	1.25346
K11936	4.96e-06	6.61e-06	0	0	4.55e-06	1.28e-05	6.67e-06	0	7.3e-06	0	4.93e-06	0	9.34e-06	6.07e-06	4.07e-06	6.3e-06	0	0	0.474726	0.593256	0.195832
K09963	7.93e-05	5.29e-05	4.1e-05	8.52e-06	1.82e-05	3.85e-05	3e-05	7.07e-05	3.65e-05	9.37e-06	2.96e-05	1.7e-05	6.07e-05	1.21e-05	7.33e-05	1.89e-05	6.25e-05	1.78e-05	0.474514	0.593142	0.295325
K03191	0	0	4.55e-06	8.52e-06	1.37e-05	0	3.34e-06	1.09e-05	1.46e-05	4.68e-06	4.93e-06	5.67e-06	9.34e-06	0	0	0	9.62e-06	5.92e-06	0.473926	0.592558	0.201605
K00286	0.000714144	0.000776877	0.000705405	0.000685731	0.000650846	0.000705771	0.000753972	0.000832245	0.000758908	0.000749225	0.000670499	0.000720408	0.000696041	0.000734678	0.000720966	0.00072483	0.000783752	0.000627512	0.47356	0.592253	2.71739
K08313	9.92e-06	9.92e-06	0	4.26e-06	0	0	3.34e-06	5.44e-06	3.65e-06	4.68e-06	4.93e-06	5.67e-06	0	0	0	0	4.81e-06	5.92e-06	0.473015	0.591723	0.194133
K20531	1.98e-05	1.32e-05	3.64e-05	2.13e-05	1.82e-05	2.99e-05	2e-05	3.26e-05	2.19e-05	1.4e-05	2.96e-05	2.27e-05	9.34e-06	3.64e-05	1.63e-05	3.15e-05	1.44e-05	1.18e-05	0.471754	0.590295	0.481069
K00990	1.49e-05	6.61e-06	9.1e-06	1.28e-05	1.37e-05	8.55e-06	1.33e-05	1.09e-05	1.46e-05	1.4e-05	0	5.67e-06	9.34e-06	1.82e-05	4.07e-06	1.26e-05	1.44e-05	1.18e-05	0.470578	0.588974	0.446586
K02552	4.96e-06	0	1.37e-05	8.52e-06	0	0	3.34e-06	5.44e-06	3.65e-06	4.68e-06	9.86e-06	5.67e-06	0	6.07e-06	0	6.3e-06	4.81e-06	1.78e-05	0.469992	0.588391	-0.201383
K00169	0.000128943	0.000148764	0.00013653	0.000170368	0.00020026	0.000243812	0.000146791	0.000157746	0.000160538	0.000177941	0.000113393	0.000187193	0.000154157	0.000133578	0.000183296	0.000138663	0.000149057	0.000159838	0.469642	0.588104	0.991619
K22168	4.96e-06	3.31e-06	4.55e-06	4.26e-06	4.55e-06	8.55e-06	6.67e-06	1.09e-05	7.3e-06	4.68e-06	9.86e-06	5.67e-06	4.67e-06	1.21e-05	4.07e-06	1.26e-05	4.81e-06	5.92e-06	0.468846	0.587258	-0.42581
K16169	0	0	0	0	4.55e-06	0	0	0	0	0	0	0	4.67e-06	0	0	6.3e-06	0	0	0.468794	0.587258	-0.0804343
K02871	0.0011704	0.00120333	0.00111955	0.00121813	0.00119701	0.00123189	0.00122437	0.00110966	0.00114931	0.00121749	0.00126705	0.00116286	0.00120523	0.00122649	0.00107127	0.00118494	0.0011588	0.00131422	0.468685	0.587258	-3.86299
K21883	0	3.31e-06	0	4.26e-06	0	4.28e-06	6.67e-06	0	3.65e-06	4.68e-06	4.93e-06	0	0	0	0	0	4.81e-06	0	0.468591	0.587258	0.15723
K01523	0.000104146	0.000109093	9.1e-05	9.37e-05	0.000104682	9.84e-05	0.00013011	9.25e-05	9.85e-05	9.83e-05	0.000103533	0.000107778	8.88e-05	0.000109291	6.52e-05	0.000107149	8.65e-05	0.000112479	0.468503	0.587258	1.39222
K06181	4.96e-06	6.61e-06	9.1e-06	4.26e-06	9.1e-06	4.28e-06	1e-05	0	7.3e-06	9.37e-06	4.93e-06	5.67e-06	1.4e-05	6.07e-06	8.15e-06	6.3e-06	4.81e-06	5.92e-06	0.468432	0.587258	-0.419016
K13628	4.96e-06	9.92e-06	1.37e-05	1.28e-05	9.1e-06	8.55e-06	3.34e-06	1.09e-05	3.65e-06	4.68e-06	9.86e-06	5.67e-06	4.67e-06	2.43e-05	1.22e-05	2.52e-05	4.81e-06	5.92e-06	0.468381	0.587258	-0.284829
K11004	1.49e-05	1.98e-05	2.28e-05	1.7e-05	1.82e-05	2.57e-05	2e-05	0	1.82e-05	0	2.47e-05	1.7e-05	9.34e-06	2.43e-05	4.07e-06	3.15e-05	4.81e-06	1.18e-05	0.468345	0.587258	0.325727
K00094	0	9.92e-06	0	4.26e-06	4.55e-06	0	0	0	0	0	4.93e-06	0	4.67e-06	0	0	0	0	0	0.468142	0.587258	0.103541
K11922	4.96e-06	3.31e-06	4.55e-06	0	0	8.55e-06	0	5.44e-06	3.65e-06	0	4.93e-06	5.67e-06	4.67e-06	6.07e-06	0	0	0	0	0.467879	0.587258	0.189747
K02895	0.0013043	0.00130251	0.00118326	0.00126072	0.00124708	0.00123617	0.00116432	0.00118037	0.00119674	0.00132051	0.00133607	0.00124795	0.0012099	0.00122649	0.00112829	0.00128579	0.00123573	0.00126686	0.467587	0.587183	-4.10223
K03229	4.96e-06	9.92e-06	4.55e-06	8.52e-06	4.55e-06	0	6.67e-06	1.09e-05	7.3e-06	4.68e-06	1.48e-05	5.67e-06	4.67e-06	1.21e-05	4.07e-06	1.26e-05	4.81e-06	5.92e-06	0.467159	0.586795	-0.355301
K01414	2.48e-05	1.98e-05	3.19e-05	2.13e-05	1.82e-05	1.28e-05	2.34e-05	1.63e-05	2.19e-05	9.37e-06	1.48e-05	1.7e-05	1.4e-05	3.64e-05	1.22e-05	3.15e-05	1.92e-05	1.18e-05	0.467033	0.586788	0.495647
K01114	0	3.31e-06	0	1.28e-05	4.55e-06	8.55e-06	0	0	0	4.68e-06	9.86e-06	0	4.67e-06	6.07e-06	8.15e-06	0	9.62e-06	0	0.465536	0.585057	-0.176235
K03837	0	6.61e-06	4.55e-06	0	0	0	0	5.44e-06	0	0	0	0	0	0	4.07e-06	0	4.81e-06	0	0.464443	0.583834	0.111944
K11912	0	3.31e-06	0	0	0	0	0	5.44e-06	0	0	0	5.67e-06	0	0	0	0	4.81e-06	5.92e-06	0.464164	0.583633	-0.111642
K01011	1.49e-05	1.32e-05	1.37e-05	1.28e-05	9.1e-06	1.28e-05	2e-05	2.18e-05	1.09e-05	1.4e-05	1.48e-05	1.13e-05	9.34e-06	6.07e-06	8.15e-06	6.3e-06	1.92e-05	2.37e-05	0.464043	0.583631	0.503332
K20447	0	0	9.1e-06	4.26e-06	4.55e-06	4.28e-06	6.67e-06	0	7.3e-06	1.87e-05	1.48e-05	0	4.67e-06	0	4.07e-06	0	4.81e-06	5.92e-06	0.463877	0.583572	-0.180284
K20491	1.49e-05	9.92e-06	1.37e-05	2.13e-05	9.1e-06	1.71e-05	3.34e-06	2.18e-05	3.65e-06	1.4e-05	9.86e-06	1.7e-05	2.34e-05	1.21e-05	1.63e-05	1.26e-05	2.4e-05	5.92e-06	0.463376	0.583092	-0.418205
K10671	0	2.64e-05	9.1e-06	3.41e-05	4.55e-06	1.28e-05	2e-05	2.72e-05	1.09e-05	2.81e-05	2.96e-05	1.7e-05	1.87e-05	1.21e-05	8.15e-06	6.3e-06	2.4e-05	3.55e-05	0.463347	0.583092	-0.321492
K09790	0.000267804	0.000244634	0.00022755	0.000204441	0.000186606	0.000273753	0.000176816	0.000261097	0.000200673	0.000271594	0.000207066	0.000147485	0.000383056	0.000151793	0.000431765	0.000182783	0.000336581	0.000183518	0.463092	0.583034	-0.586855
K01890	0.000833168	0.000803324	0.000755466	0.000770915	0.000878415	0.000778486	0.000780661	0.000810487	0.0007808	0.000800734	0.000798683	0.000856548	0.000817497	0.000837897	0.000777991	0.000775252	0.000798177	0.00083471	0.463028	0.583034	-4.67537
K07108	9.92e-06	1.65e-05	1.37e-05	8.52e-06	9.1e-06	1.28e-05	2e-05	2.18e-05	1.46e-05	9.37e-06	1.97e-05	2.27e-05	9.34e-06	2.43e-05	8.15e-06	2.52e-05	9.62e-06	1.78e-05	0.462655	0.582784	-0.485268
K01591	0.000838127	0.000935559	0.000969363	0.000885913	0.000910274	0.000932473	0.000914107	0.000968233	0.000919446	0.000955262	0.000843054	0.000856548	0.000896911	0.000935045	0.000977581	0.000775252	0.00101455	0.00081695	0.462031	0.582147	2.76894
K00262	0.000853005	0.000829771	0.000837384	0.000834803	0.000737322	0.00083837	0.000827367	0.00089752	0.0009085	0.000842878	0.000877565	0.000816841	0.000868883	0.000819682	0.00100202	0.00081307	0.000923192	0.00078735	0.46131	0.581388	-2.80976
K03488	0.000104146	5.95e-05	8.65e-05	8.94e-05	7.28e-05	9.41e-05	7.01e-05	8.7e-05	7.66e-05	3.75e-05	5.92e-05	3.97e-05	0.000126128	3.04e-05	0.000167003	2.52e-05	0.000100974	3.55e-05	0.460751	0.580833	0.395996
K11180	0	3.31e-06	4.55e-06	0	4.55e-06	0	3.34e-06	1.09e-05	0	4.68e-06	9.86e-06	0	4.67e-06	6.07e-06	8.15e-06	0	4.81e-06	0	0.459954	0.579978	-0.193675
K13018	3.47e-05	5.95e-05	3.64e-05	5.54e-05	2.28e-05	3.42e-05	5.67e-05	5.98e-05	5.11e-05	3.75e-05	4.44e-05	3.4e-05	4.2e-05	4.25e-05	5.3e-05	5.67e-05	3.37e-05	2.96e-05	0.459919	0.579978	0.729152
K15553	3.97e-05	4.63e-05	4.55e-05	5.11e-05	6.37e-05	5.99e-05	4.67e-05	6.53e-05	3.65e-05	3.75e-05	2.47e-05	4.54e-05	4.67e-05	4.86e-05	7.33e-05	5.04e-05	4.33e-05	4.74e-05	0.458856	0.578892	0.810418
K21577	4.96e-06	2.31e-05	2.28e-05	2.56e-05	4.55e-06	1.28e-05	1.67e-05	1.63e-05	2.55e-05	2.34e-05	9.86e-06	1.7e-05	9.34e-06	6.07e-06	4.07e-06	6.3e-06	1.92e-05	2.96e-05	0.458527	0.578626	0.351192
K10806	9.92e-06	6.61e-06	1.82e-05	1.7e-05	2.28e-05	1.28e-05	6.67e-06	1.09e-05	7.3e-06	1.4e-05	1.48e-05	1.13e-05	1.4e-05	1.82e-05	1.22e-05	1.89e-05	1.92e-05	5.92e-06	0.457446	0.577411	-0.51586
K02079	0	0	4.55e-06	0	0	0	0	0	0	0	4.93e-06	0	0	0	0	6.3e-06	0	0	0.457384	0.577411	-0.0826395
K02575	1.49e-05	0	1.82e-05	4.26e-06	0	0	0	5.44e-06	0	1.4e-05	0	0	4.67e-06	1.21e-05	4.07e-06	1.26e-05	9.62e-06	5.92e-06	0.457306	0.577411	-0.183438
K01166	4.96e-06	0	0	0	0	0	0	0	0	0	0	0	0	0	0	6.3e-06	0	5.92e-06	0.455285	0.575128	-0.0835449
K02965	0.00114561	0.00119672	0.00121967	0.00119684	0.00126528	0.00121906	0.00111761	0.00104439	0.0011785	0.00129241	0.00127691	0.00124795	0.00118654	0.00113541	0.00107941	0.00117864	0.00116361	0.00124318	0.454721	0.574564	-3.43451
K04072	0.00037195	0.000370257	0.000304917	0.000285366	0.00033225	0.000363579	0.000283573	0.000288294	0.000295536	0.000313738	0.000295808	0.000323333	0.000322327	0.000291443	0.000276981	0.000289932	0.000336581	0.000343356	0.454465	0.574389	1.97192
K01907	0	9.92e-06	9.1e-06	1.28e-05	1.37e-05	8.55e-06	3.34e-06	0	7.3e-06	4.68e-06	9.86e-06	0	4.67e-06	6.07e-06	4.07e-06	6.3e-06	9.62e-06	5.92e-06	0.453691	0.573558	0.304758
K20628	1.49e-05	9.92e-06	4.55e-06	8.52e-06	0	1.28e-05	1e-05	5.44e-06	7.3e-06	9.37e-06	1.48e-05	1.7e-05	0	1.21e-05	8.15e-06	1.26e-05	0	1.78e-05	0.453307	0.57322	-0.319988
K01451	0	0	0	0	0	0	0	5.44e-06	0	4.68e-06	0	0	0	0	0	0	9.62e-06	0	0.453165	0.573189	-0.079388
K14654	1.98e-05	2.98e-05	1.82e-05	2.13e-05	3.64e-05	2.57e-05	3.34e-05	2.72e-05	2.92e-05	1.87e-05	2.96e-05	3.4e-05	1.87e-05	1.82e-05	2.04e-05	2.52e-05	1.92e-05	3.55e-05	0.453015	0.573148	0.763687
K01354	4.96e-06	0	0	0	0	4.28e-06	0	0	3.65e-06	4.68e-06	0	5.67e-06	0	0	0	0	4.81e-06	5.92e-06	0.452694	0.572889	-0.148096
K10036	0	3.31e-06	4.55e-06	8.52e-06	9.1e-06	8.55e-06	3.34e-06	5.44e-06	3.65e-06	0	4.93e-06	1.13e-05	4.67e-06	6.07e-06	8.15e-06	1.26e-05	0	1.18e-05	0.452632	0.572889	-0.28982
K11924	4.96e-06	0	4.55e-06	8.52e-06	4.55e-06	0	6.67e-06	0	3.65e-06	0	4.93e-06	5.67e-06	0	6.07e-06	4.07e-06	1.26e-05	4.81e-06	5.92e-06	0.452631	0.572889	-0.246103
K02170	9.92e-06	1.32e-05	1.82e-05	8.52e-06	9.1e-06	4.28e-06	1.33e-05	0	1.46e-05	4.68e-06	4.93e-06	5.67e-06	4.67e-06	1.82e-05	8.15e-06	1.26e-05	9.62e-06	5.92e-06	0.450634	0.570726	0.357579
K10805	4.96e-06	0	0	0	0	0	0	0	3.65e-06	0	0	5.67e-06	0	0	0	0	4.81e-06	5.92e-06	0.450447	0.570636	-0.115755
K13016	9.92e-06	1.65e-05	1.37e-05	4.26e-06	4.55e-06	1.71e-05	1.33e-05	2.72e-05	1.46e-05	9.37e-06	9.86e-06	1.13e-05	9.34e-06	1.82e-05	8.15e-06	1.89e-05	4.81e-06	1.18e-05	0.449456	0.569528	0.415968
K00318	0	0	9.1e-06	0	0	0	0	1.09e-05	0	0	0	0	4.67e-06	0	4.07e-06	0	0	0	0.448958	0.569044	0.0926221
K02988	0.00120512	0.00120664	0.00119691	0.00123517	0.00123342	0.00120195	0.00117433	0.00113686	0.00122958	0.00125964	0.00130649	0.00123661	0.00126128	0.00119006	0.0010957	0.00122906	0.00113476	0.00128462	0.448509	0.568623	-4.45064
K00180	0.000386828	0.000476044	0.000386835	0.000481289	0.000414175	0.000449127	0.000523777	0.000402524	0.000503506	0.000430804	0.000517665	0.000510525	0.000439113	0.000406805	0.000476571	0.000428595	0.000485638	0.000479514	0.448088	0.568236	-1.97625
K13695	4.96e-06	6.61e-06	1.37e-05	8.52e-06	9.1e-06	8.55e-06	6.67e-06	5.44e-06	1.09e-05	1.87e-05	0	0	1.4e-05	3.04e-05	8.15e-06	1.89e-05	9.62e-06	0	0.447932	0.568185	-0.2508
K21612	4.96e-06	1.32e-05	4.55e-06	4.26e-06	4.55e-06	8.55e-06	1e-05	1.09e-05	7.3e-06	4.68e-06	9.86e-06	1.7e-05	4.67e-06	1.21e-05	4.07e-06	1.26e-05	4.81e-06	1.18e-05	0.447545	0.567842	-0.410772
K02994	0.00129934	0.00122978	0.00120601	0.00116702	0.00126983	0.00121906	0.00125439	0.0011423	0.00125877	0.00131114	0.00131142	0.00127631	0.00126595	0.00122649	0.00109163	0.00122906	0.00124535	0.00128462	0.446901	0.567171	-4.17482
K01622	4.96e-06	1.32e-05	4.55e-06	4.26e-06	4.55e-06	4.28e-06	1e-05	1.09e-05	7.3e-06	4.68e-06	9.86e-06	1.13e-05	4.67e-06	1.21e-05	4.07e-06	1.26e-05	4.81e-06	1.18e-05	0.446737	0.567111	-0.431062
K06400	0.000173577	0.000188434	0.000131979	0.000144813	0.00023212	0.000183928	0.000120102	0.000152306	0.000127701	0.000149845	8.87e-05	0.000209883	0.000149485	0.000151793	0.00016293	0.000138663	0.000144249	0.000147998	0.446671	0.567111	0.920548
K03785	0.000153739	0.000132234	0.000154734	0.000170368	0.000163849	0.000166819	0.000123438	0.000163185	0.000134998	9.83e-05	9.37e-05	0.000107778	0.000205542	0.000121434	0.000236249	9.45e-05	0.00016829	0.000106559	0.446581	0.567111	0.726399
K13929	0	6.61e-06	0	4.26e-06	4.55e-06	4.28e-06	3.34e-06	0	3.65e-06	0	0	5.67e-06	4.67e-06	1.21e-05	0	1.26e-05	4.81e-06	0	0.445872	0.566453	-0.185945
K01849	9.92e-06	1.32e-05	1.82e-05	1.28e-05	1.82e-05	1.71e-05	1.67e-05	1.63e-05	1.82e-05	1.87e-05	2.96e-05	1.7e-05	1.87e-05	1.21e-05	1.22e-05	1.26e-05	2.4e-05	1.18e-05	0.445463	0.566081	-0.681179
K13853	0	0	4.55e-06	0	0	0	3.34e-06	0	0	4.68e-06	0	5.67e-06	0	0	0	0	4.81e-06	0	0.444956	0.565583	-0.11706
K07581	4.96e-06	9.92e-06	9.1e-06	4.26e-06	4.55e-06	8.55e-06	1e-05	1.09e-05	1.09e-05	4.68e-06	9.86e-06	1.7e-05	4.67e-06	1.21e-05	4.07e-06	1.89e-05	4.81e-06	1.18e-05	0.4449	0.565583	-0.403175
K03538	4.96e-06	9.92e-06	4.55e-06	4.26e-06	4.55e-06	8.55e-06	1e-05	1.09e-05	1.09e-05	4.68e-06	9.86e-06	1.13e-05	4.67e-06	1.21e-05	4.07e-06	1.26e-05	4.81e-06	1.78e-05	0.444461	0.565248	-0.418626
K07575	4.96e-06	9.92e-06	4.55e-06	4.26e-06	4.55e-06	8.55e-06	1e-05	1.09e-05	1.09e-05	4.68e-06	9.86e-06	1.13e-05	4.67e-06	1.21e-05	4.07e-06	1.26e-05	4.81e-06	1.78e-05	0.444461	0.565248	-0.418626
K03620	1.49e-05	1.65e-05	1.37e-05	1.7e-05	1.82e-05	1.28e-05	1.67e-05	1.63e-05	7.3e-06	1.87e-05	1.48e-05	5.67e-06	9.34e-06	6.07e-06	1.22e-05	1.26e-05	2.88e-05	5.92e-06	0.443847	0.56476	0.475735
K18682	0.000867883	0.000912418	0.00081918	0.000885913	0.000923928	0.000829815	0.000814023	0.000837685	0.000824583	0.000880339	0.000921936	0.000873566	0.000854869	0.000856112	0.000835017	0.000819372	0.000894343	0.000905749	0.443643	0.564647	-4.5889
K10012	6.94e-05	7.93e-05	9.56e-05	6.81e-05	7.28e-05	7.7e-05	0.000110093	8.7e-05	0.000113106	7.96e-05	7.4e-05	0.000102105	5.14e-05	8.5e-05	8.96e-05	7.56e-05	8.65e-05	7.7e-05	0.443622	0.564647	1.0747
K04797	4.96e-06	9.92e-06	9.1e-06	4.26e-06	4.55e-06	8.55e-06	1e-05	1.09e-05	1.09e-05	4.68e-06	9.86e-06	1.7e-05	4.67e-06	1.21e-05	4.07e-06	1.26e-05	4.81e-06	1.78e-05	0.443186	0.564359	-0.413821
K02823	0.000828209	0.00086283	0.000796425	0.000881654	0.000855658	0.000889699	0.000800678	0.000924717	0.00083188	0.000870974	0.000774032	0.000828186	0.000878226	0.000758965	0.000936848	0.000794161	0.000908767	0.000722231	0.443084	0.564359	2.82736
K09388	0	0	0	4.26e-06	0	0	0	0	0	0	4.93e-06	0	0	0	0	0	0	5.92e-06	0.443058	0.564359	-0.0853498
K03790	0.000401706	0.000528938	0.000423243	0.000592028	0.000591678	0.000547507	0.000510432	0.000473238	0.000510803	0.000575967	0.000552176	0.000555905	0.000476484	0.000467522	0.000537669	0.000504229	0.000519296	0.000574233	0.443026	0.564359	-1.89134
K16849	1.98e-05	2.64e-05	2.73e-05	2.98e-05	3.19e-05	1.71e-05	1.67e-05	2.18e-05	1.46e-05	1.87e-05	1.97e-05	2.84e-05	3.27e-05	3.64e-05	4.07e-05	3.78e-05	4.81e-06	1.78e-05	0.442836	0.564359	-0.521481
K03117	9.92e-06	1.32e-05	1.37e-05	1.28e-05	9.1e-06	8.55e-06	1e-05	5.44e-06	1.46e-05	2.34e-05	9.86e-06	5.67e-06	9.34e-06	1.82e-05	8.15e-06	1.89e-05	1.44e-05	5.92e-06	0.442816	0.564359	-0.475985
K18828	8.43e-05	4.96e-05	0.000109224	6.81e-05	0.000104682	8.98e-05	0.000106757	5.44e-05	9.85e-05	5.15e-05	7.4e-05	9.08e-05	2.8e-05	0.000127506	4.89e-05	0.000113452	3.85e-05	9.47e-05	0.44256	0.564359	0.545339
K02968	0.00118032	0.00120003	0.00111955	0.00114146	0.00115605	0.0011549	0.00109092	0.00104983	0.00113836	0.00113788	0.00121281	0.00116286	0.00114917	0.0011597	0.00107941	0.0010967	0.0011588	0.00123135	0.441456	0.563182	-4.91439
K14086	1.49e-05	1.32e-05	2.28e-05	2.13e-05	1.82e-05	1.71e-05	2.34e-05	2.72e-05	2.55e-05	1.4e-05	2.47e-05	2.27e-05	2.8e-05	1.82e-05	2.85e-05	1.26e-05	2.4e-05	2.96e-05	0.441134	0.562918	-0.774546
K18282	0	6.61e-06	0	0	1.37e-05	4.28e-06	3.34e-06	0	3.65e-06	1.4e-05	4.93e-06	0	4.67e-06	0	8.15e-06	0	9.62e-06	5.92e-06	0.440758	0.562584	-0.188735
K17241	0	0	0	4.26e-06	4.55e-06	0	0	5.44e-06	0	0	0	0	4.67e-06	0	4.07e-06	0	4.81e-06	1.18e-05	0.440752	0.562584	-0.134122
K08352	0	0	0	4.26e-06	4.55e-06	0	0	5.44e-06	3.65e-06	4.68e-06	4.93e-06	0	0	6.07e-06	0	6.3e-06	4.81e-06	0	0.440552	0.562584	-0.189151
K02015	0.00102658	0.00100498	0.00103763	0.00105628	0.000914826	0.00100519	0.000997511	0.0011423	0.000985121	0.000903753	0.0010797	0.00106076	0.000995011	0.0012872	0.00112014	0.00126057	0.000899151	0.000935348	0.440475	0.562584	-1.89725
K08094	1.98e-05	3.97e-05	3.64e-05	2.98e-05	2.28e-05	2.99e-05	2.34e-05	3.26e-05	4.01e-05	3.75e-05	4.44e-05	3.4e-05	9.34e-06	4.86e-05	1.63e-05	5.04e-05	1.92e-05	5.92e-05	0.440093	0.562322	-0.503451
K07502	0.000109105	0.000128929	0.000118326	0.000123517	0.00013199	0.000124045	0.000146791	0.000157746	0.000145944	9.37e-05	0.000118323	0.000187193	0.000135471	0.00013965	0.000211809	0.00013236	0.000105782	0.000159838	0.439481	0.561686	-0.955525
K19158	0.000317397	0.000257857	0.00027306	0.000238515	0.000254877	0.000299418	0.000310263	0.000255657	0.000339319	0.000271594	0.000211996	0.000255263	0.000233571	0.000303586	0.000329934	0.000289932	0.000302922	0.000219037	0.438985	0.561199	1.46309
K00179	0.000272763	0.000357033	0.000263958	0.000344995	0.000241223	0.000333637	0.000393667	0.000375326	0.000375805	0.000351199	0.000374691	0.000368713	0.000294299	0.000340016	0.000342153	0.000296235	0.000370239	0.000372955	0.438416	0.560619	-1.51523
K07447	0.0011952	0.00120995	0.00111044	0.00114146	0.00119701	0.00119767	0.00111428	0.00105526	0.00121133	0.00118003	0.0012424	0.00110047	0.00123792	0.0012022	0.00110793	0.00120385	0.00115399	0.00118399	0.437676	0.559818	-4.45015
K01804	0.000262845	0.000218187	0.000236652	0.000255552	0.000254877	0.000230979	0.000266893	0.000250218	0.000244456	0.000220085	0.000256367	0.00024959	0.000200871	0.000236797	0.000285128	0.000271023	0.000230798	0.000183518	0.437627	0.559818	1.91863
K05020	4.96e-06	6.61e-06	1.37e-05	3.41e-05	4.55e-06	1.28e-05	6.67e-06	1.63e-05	3.65e-06	1.4e-05	1.48e-05	1.7e-05	4.67e-06	1.82e-05	8.15e-06	1.26e-05	9.62e-06	3.55e-05	0.437434	0.559801	-0.290741
K04486	0.00100179	0.00106118	0.000932955	0.00105628	0.000973993	0.00112496	0.000960813	0.00113686	0.00105809	0.00107701	0.00109449	0.00105509	0.00112114	0.000874328	0.00119346	0.000951733	0.00128862	0.000994548	0.437392	0.559801	-2.10487
K09931	1.49e-05	2.64e-05	1.37e-05	2.13e-05	1.37e-05	2.99e-05	2e-05	5.44e-06	1.82e-05	1.87e-05	1.97e-05	2.27e-05	3.27e-05	1.82e-05	1.63e-05	1.89e-05	1.44e-05	2.37e-05	0.436784	0.559262	-0.613025
K09132	4.96e-06	1.32e-05	4.55e-06	1.7e-05	4.55e-06	1.28e-05	6.67e-06	0	7.3e-06	9.37e-06	9.86e-06	5.67e-06	1.4e-05	1.21e-05	1.22e-05	6.3e-06	4.81e-06	1.18e-05	0.436167	0.558618	-0.399522
K02926	0.00126463	0.00119011	0.00116506	0.00125646	0.00121522	0.00124044	0.00116098	0.00110422	0.00120039	0.00121281	0.00120788	0.00112316	0.00125194	0.0011597	0.00107534	0.001103	0.00118765	0.00127278	0.435496	0.557904	4.04676
K04075	0.000912517	0.000942171	0.000914751	0.000915728	0.000951237	0.000970969	0.000940797	0.000854003	0.000915798	0.000945897	0.00101068	0.000941636	0.00092494	0.000868256	0.000932775	0.000907613	0.000918384	0.00100047	0.435296	0.557795	-4.86377
K19173	4.96e-06	9.92e-06	9.1e-06	8.52e-06	9.1e-06	1.28e-05	6.67e-06	1.63e-05	1.46e-05	9.37e-06	0	2.27e-05	9.34e-06	1.82e-05	1.63e-05	1.26e-05	9.62e-06	1.18e-05	0.433218	0.555277	-0.436468
K22116	1.49e-05	1.98e-05	3.64e-05	3.83e-05	3.19e-05	2.14e-05	3.34e-05	1.63e-05	2.19e-05	3.28e-05	4.93e-05	3.4e-05	2.34e-05	2.43e-05	1.22e-05	1.89e-05	2.88e-05	4.74e-05	0.432817	0.554908	-0.534137
K06937	1.49e-05	2.31e-05	5.01e-05	2.56e-05	1.37e-05	2.14e-05	3.67e-05	3.26e-05	2.92e-05	3.28e-05	3.94e-05	6.24e-05	1.4e-05	3.64e-05	2.04e-05	3.15e-05	2.4e-05	2.96e-05	0.43267	0.554865	-0.484477
K03647	9.92e-06	3.31e-06	0	0	4.55e-06	8.55e-06	0	5.44e-06	3.65e-06	9.37e-06	0	5.67e-06	0	0	4.07e-06	0	1.44e-05	2.37e-05	0.431682	0.553743	-0.166134
K00662	0.000123983	0.000138846	0.000109224	0.000123517	0.000113784	0.000106935	0.000113429	0.000130548	0.000120404	9.37e-05	7.4e-05	0.00013614	0.000149485	9.11e-05	0.000158857	9.45e-05	0.000100974	0.000106559	0.430588	0.552484	1.08689
K02821	2.48e-05	4.3e-05	3.64e-05	2.56e-05	3.19e-05	2.99e-05	2.34e-05	4.35e-05	4.38e-05	5.62e-05	1.97e-05	2.27e-05	3.74e-05	3.04e-05	3.67e-05	3.78e-05	5.77e-05	4.14e-05	0.429119	0.550744	-0.673121
K21028	9.92e-06	6.61e-06	1.82e-05	8.52e-06	4.55e-06	1.28e-05	1e-05	1.09e-05	1.46e-05	4.68e-06	9.86e-06	1.13e-05	1.87e-05	0	1.22e-05	0	9.62e-06	1.18e-05	0.429107	0.550744	0.38379
K01751	1.49e-05	6.28e-05	5.46e-05	5.54e-05	2.73e-05	4.28e-05	6.67e-05	3.26e-05	5.11e-05	3.28e-05	2.96e-05	3.4e-05	4.67e-05	2.43e-05	4.48e-05	1.26e-05	5.29e-05	7.1e-05	0.428881	0.550728	0.503101
K02100	0	3.31e-06	0	0	0	0	0	0	0	0	0	0	4.67e-06	0	4.07e-06	0	0	0	0.427996	0.549735	-0.0880953
K06882	0	3.31e-06	4.55e-06	4.26e-06	4.55e-06	0	3.34e-06	1.09e-05	3.65e-06	9.37e-06	0	0	4.67e-06	6.07e-06	4.07e-06	6.3e-06	9.62e-06	5.92e-06	0.427443	0.549169	-0.279786
K12944	4.96e-06	6.61e-06	0	4.26e-06	4.55e-06	4.28e-06	3.34e-06	0	0	4.68e-06	0	1.13e-05	0	6.07e-06	0	6.3e-06	4.81e-06	5.92e-06	0.426806	0.548495	-0.241551
K19268	3.47e-05	6.61e-05	3.64e-05	3.83e-05	1.82e-05	2.57e-05	5.34e-05	3.81e-05	5.47e-05	5.62e-05	7.4e-05	2.84e-05	5.14e-05	3.04e-05	4.48e-05	3.15e-05	5.29e-05	4.74e-05	0.42676	0.548495	-0.6076
K09723	4.96e-06	9.92e-06	4.55e-06	4.26e-06	4.55e-06	4.28e-06	1.67e-05	1.09e-05	1.09e-05	9.37e-06	9.86e-06	1.7e-05	4.67e-06	1.21e-05	4.07e-06	1.26e-05	4.81e-06	1.18e-05	0.425673	0.547326	-0.413251
K01183	8.43e-05	9.26e-05	0.000100122	5.96e-05	8.19e-05	7.27e-05	6.67e-05	8.16e-05	8.03e-05	7.49e-05	6.41e-05	9.08e-05	8.41e-05	0.000109291	6.92e-05	0.000113452	7.21e-05	9.47e-05	0.425667	0.547326	-1.13279
K07264	0	0	4.55e-06	0	0	0	1e-05	0	1.09e-05	0	0	0	0	6.07e-06	0	6.3e-06	0	0	0.425174	0.546971	0.116164
K01491	0.00122	0.00116366	0.00117416	0.00119684	0.0011515	0.00118912	0.00122103	0.00100087	0.00119674	0.001269	0.00120295	0.0012593	0.00118187	0.00123863	0.00106719	0.00115342	0.00115399	0.00121359	0.424793	0.546625	-3.78383
K22719	4.96e-06	3.31e-06	4.55e-06	4.26e-06	4.55e-06	4.28e-06	3.34e-06	5.44e-06	3.65e-06	0	0	0	4.67e-06	6.07e-06	8.15e-06	6.3e-06	4.81e-06	0	0.424571	0.546483	0.330047
K01772	9.92e-06	1.98e-05	2.73e-05	2.13e-05	2.73e-05	1.28e-05	2e-05	1.63e-05	1.82e-05	2.81e-05	1.48e-05	5.67e-06	9.34e-06	4.25e-05	2.04e-05	3.15e-05	2.88e-05	2.37e-05	0.424559	0.546483	-0.477106
K07281	0	0	4.55e-06	0	0	4.28e-06	0	0	3.65e-06	4.68e-06	0	5.67e-06	0	0	0	0	4.81e-06	5.92e-06	0.424554	0.546483	-0.157188
K03749	4.96e-06	3.31e-06	0	8.52e-06	9.1e-06	4.28e-06	6.67e-06	5.44e-06	3.65e-06	9.37e-06	0	0	9.34e-06	1.21e-05	4.07e-06	1.89e-05	9.62e-06	0	0.424244	0.546483	-0.252413
K15987	0.000307479	0.000267775	0.000295815	0.000251293	0.000218466	0.000260921	0.000266893	0.000217581	0.000251753	0.000248181	0.000271158	0.00024959	0.000238242	0.000333945	0.000224029	0.000315143	0.000235606	0.000367035	0.423998	0.546321	-1.34282
K03679	4.96e-06	9.92e-06	4.55e-06	4.26e-06	4.55e-06	8.55e-06	1.33e-05	1.09e-05	1.46e-05	4.68e-06	9.86e-06	1.7e-05	4.67e-06	1.21e-05	4.07e-06	1.89e-05	4.81e-06	1.78e-05	0.423003	0.545182	-0.375501
K06391	0.000213251	0.00013554	0.000241203	0.000174627	0.000177503	0.000286586	0.000150127	0.000190383	0.000164187	0.000271594	0.000246507	0.000147485	0.000224228	0.000188223	0.000272908	0.000151269	0.000235606	0.000165758	0.421121	0.542898	-0.873474
K02836	0.00105138	0.00106449	0.000978465	0.00109036	0.00108778	0.00110785	0.0010609	0.000973673	0.000977824	0.00108169	0.00104026	0.00102672	0.00103705	0.00100183	0.000949068	0.000970641	0.0010434	0.00107151	0.420885	0.542738	4.46581
K06019	9.92e-05	9.26e-05	0.000127428	7.24e-05	6.37e-05	0.000106935	8.67e-05	7.07e-05	0.000113106	8.43e-05	8.38e-05	9.08e-05	6.07e-05	9.71e-05	8.55e-05	0.000107149	7.21e-05	8.88e-05	0.420451	0.54232	1.05085
K02954	0.000803412	0.000750431	0.000796425	0.000770915	0.000782836	0.000795596	0.000737291	0.000652742	0.000715125	0.000767956	0.000734591	0.000731753	0.000789469	0.000722535	0.000562109	0.000825675	0.000730861	0.000722231	0.420391	0.54232	2.52307
K07248	0	0	4.55e-06	0	1.37e-05	0	0	1.09e-05	0	0	4.93e-06	0	4.67e-06	1.21e-05	8.15e-06	1.26e-05	4.81e-06	0	0.419975	0.541993	-0.173269
K06133	0.000466177	0.000495879	0.000464202	0.000528141	0.000459689	0.000449127	0.00046039	0.000500435	0.000437832	0.000571284	0.000488084	0.000516198	0.000504513	0.000382518	0.00051323	0.000409686	0.00059142	0.000467674	0.419787	0.541893	-1.95819
K10763	4.96e-06	0	9.1e-06	0	0	4.28e-06	3.34e-06	5.44e-06	0	0	0	0	0	6.07e-06	4.07e-06	6.3e-06	0	0	0.419758	0.541893	0.16765
K21903	0.000986907	0.00099837	0.000919302	0.000971097	0.00101496	0.000932473	0.000947469	0.000864883	0.000934041	0.0010536	0.00101561	0.00103807	0.00092494	0.000874328	0.000904262	0.000939127	0.00100974	0.00100639	0.419412	0.541694	-3.6304
K05780	0	6.61e-06	0	4.26e-06	0	0	3.34e-06	1.09e-05	3.65e-06	0	0	1.13e-05	4.67e-06	6.07e-06	8.15e-06	6.3e-06	0	5.92e-06	0.419195	0.541557	-0.214823
K03421	4.96e-06	9.92e-06	9.1e-06	4.26e-06	4.55e-06	8.55e-06	1.33e-05	1.09e-05	1.09e-05	4.68e-06	9.86e-06	1.7e-05	4.67e-06	1.21e-05	4.07e-06	1.89e-05	4.81e-06	1.78e-05	0.419192	0.541557	-0.402179
K03531	0.000986907	0.000981841	0.000973914	0.000996652	0.00106502	0.00103513	0.00096415	0.000924717	0.00100336	0.0010255	0.000995888	0.000975671	0.00100902	0.00098969	0.000985727	0.00102737	0.00100012	0.00103599	0.418901	0.541463	-6.54619
K19303	4.96e-06	0	9.1e-06	0	0	0	0	0	3.65e-06	0	4.93e-06	5.67e-06	0	6.07e-06	0	6.3e-06	0	5.92e-06	0.418617	0.541239	-0.172154
K02799	2.48e-05	1.98e-05	9.1e-06	2.13e-05	2.28e-05	2.14e-05	1e-05	4.35e-05	2.19e-05	4.68e-06	1.48e-05	3.4e-05	9.34e-06	1.82e-05	3.67e-05	1.26e-05	9.62e-06	1.78e-05	0.418526	0.541239	0.394954
K02800	2.48e-05	1.98e-05	9.1e-06	2.13e-05	2.28e-05	2.14e-05	1e-05	4.35e-05	2.19e-05	4.68e-06	1.48e-05	3.4e-05	9.34e-06	1.82e-05	3.67e-05	1.26e-05	9.62e-06	1.78e-05	0.418526	0.541239	0.394954
K07576	0.000292601	0.000380174	0.000336774	0.000327958	0.000382315	0.000402075	0.000336952	0.000304613	0.00036486	0.00036993	0.000389481	0.000391403	0.000392399	0.000321801	0.000399179	0.000296235	0.000322156	0.000378875	0.418258	0.541204	-1.98526
K18907	4.96e-06	0	9.1e-06	0	0	4.28e-06	0	0	0	4.68e-06	0	0	0	0	4.07e-06	0	0	0	0.41808	0.541116	0.116935
K01139	5.46e-05	2.31e-05	5.46e-05	4.69e-05	5.46e-05	4.28e-05	4.34e-05	3.81e-05	4.74e-05	3.75e-05	4.93e-05	3.4e-05	3.27e-05	5.46e-05	3.67e-05	6.3e-05	2.88e-05	2.96e-05	0.417834	0.540941	0.813693
K05501	4.96e-06	3.31e-06	4.55e-06	4.26e-06	4.55e-06	4.28e-06	3.34e-06	5.44e-06	3.65e-06	9.37e-06	0	0	9.34e-06	1.21e-05	8.15e-06	6.3e-06	4.81e-06	0	0.417167	0.540221	-0.313202
K07473	0.000714144	0.000697537	0.000696303	0.000728323	0.000732771	0.000680106	0.000834039	0.0006745	0.000788097	0.000697716	0.000764172	0.000833858	0.000696041	0.000862184	0.000606915	0.000750041	0.000730861	0.000852469	0.416166	0.539066	-2.24074
K18298	0	0	0	0	4.55e-06	0	0	0	0	0	0	0	0	6.07e-06	0	6.3e-06	0	0	0.415931	0.538905	-0.0903795
K12630	0	0	0	4.26e-06	0	0	0	0	0	0	0	5.67e-06	0	0	0	0	0	5.92e-06	0.415687	0.538731	-0.0904164
K03219	4.96e-06	3.31e-06	4.55e-06	8.52e-06	4.55e-06	0	1e-05	5.44e-06	1.09e-05	4.68e-06	9.86e-06	5.67e-06	4.67e-06	1.21e-05	4.07e-06	1.26e-05	4.81e-06	5.92e-06	0.414931	0.537894	-0.402586
K03672	2.98e-05	6.61e-06	2.28e-05	1.7e-05	2.73e-05	2.14e-05	2.34e-05	1.63e-05	1.82e-05	2.34e-05	2.47e-05	2.84e-05	1.4e-05	1.21e-05	1.22e-05	1.26e-05	1.44e-05	1.78e-05	0.41482	0.537893	0.619117
K21515	0	0	0	0	4.55e-06	0	1e-05	5.44e-06	3.65e-06	0	0	0	0	6.07e-06	0	6.3e-06	0	0	0.414781	0.537893	0.134113
K02058	7.93e-05	9.92e-05	0.000127428	0.000144813	0.000118336	0.000106935	0.000156799	0.000174064	0.000134998	0.000131114	0.000147904	0.000124795	0.000107442	0.000194295	0.000109978	0.000201692	0.000110591	0.000130238	0.414021	0.537141	-0.869836
K17240	9.92e-06	1.32e-05	4.55e-06	4.26e-06	9.1e-06	8.55e-06	1.33e-05	5.44e-06	1.09e-05	1.87e-05	1.48e-05	5.67e-06	0	1.21e-05	1.22e-05	6.3e-06	1.44e-05	1.18e-05	0.413935	0.537141	-0.440562
K09738	0	6.61e-06	4.55e-06	0	0	0	6.67e-06	0	3.65e-06	0	0	5.67e-06	0	0	0	0	0	5.92e-06	0.413267	0.536447	0.141243
K02921	9.92e-06	1.32e-05	1.37e-05	1.28e-05	4.55e-06	8.55e-06	1.67e-05	1.63e-05	7.3e-06	9.37e-06	1.97e-05	2.27e-05	4.67e-06	1.82e-05	4.07e-06	1.89e-05	4.81e-06	2.37e-05	0.413237	0.536447	-0.419057
K20201	1.98e-05	4.3e-05	1.82e-05	2.13e-05	1.37e-05	4.28e-06	2.34e-05	2.72e-05	1.46e-05	1.87e-05	2.47e-05	1.7e-05	2.34e-05	3.04e-05	2.85e-05	1.89e-05	3.85e-05	1.78e-05	0.413176	0.536447	-0.525771
K07390	0	0	0	4.26e-06	4.55e-06	0	1e-05	0	3.65e-06	0	0	5.67e-06	0	0	0	0	0	5.92e-06	0.412581	0.535983	0.132698
K01971	1.98e-05	3.31e-05	1.37e-05	8.52e-06	9.1e-06	8.55e-06	6.67e-06	5.44e-06	3.65e-06	9.37e-06	0	2.27e-05	4.67e-06	1.21e-05	4.07e-06	1.89e-05	0	5.92e-06	0.412563	0.535983	0.256199
K02430	4.96e-06	1.65e-05	1.37e-05	4.26e-06	9.1e-06	1.28e-05	1e-05	1.09e-05	1.09e-05	9.37e-06	9.86e-06	1.13e-05	9.34e-06	6.07e-06	1.22e-05	2.52e-05	9.62e-06	1.78e-05	0.412374	0.535983	-0.490036
K13829	1.49e-05	1.32e-05	1.37e-05	1.7e-05	1.82e-05	8.55e-06	2e-05	1.09e-05	1.46e-05	1.87e-05	9.86e-06	1.7e-05	1.4e-05	2.43e-05	1.22e-05	2.52e-05	1.44e-05	1.18e-05	0.412345	0.535983	-0.719677
K06013	2.48e-05	5.29e-05	4.55e-05	2.13e-05	4.1e-05	1.71e-05	4e-05	1.63e-05	3.65e-05	3.28e-05	4.44e-05	2.84e-05	2.8e-05	5.46e-05	2.44e-05	6.93e-05	2.88e-05	3.55e-05	0.409835	0.532981	-0.541209
K20344	7.93e-05	7.6e-05	6.83e-05	6.39e-05	8.19e-05	6.42e-05	6.01e-05	4.35e-05	5.84e-05	7.02e-05	7.89e-05	7.37e-05	7.01e-05	0.000103219	6.52e-05	6.93e-05	5.29e-05	5.92e-05	0.409598	0.532815	-1.12728
K07342	4.96e-06	9.92e-06	9.1e-06	4.26e-06	4.55e-06	8.55e-06	1e-05	1.09e-05	1.09e-05	9.37e-06	9.86e-06	1.7e-05	4.67e-06	1.21e-05	4.07e-06	1.26e-05	4.81e-06	1.18e-05	0.409352	0.532637	-0.52094
K19225	0.000163658	0.000138846	0.000154734	0.000132035	0.000141093	0.000183928	0.000133446	0.000195822	0.000131349	0.000145162	0.000108463	0.000141813	0.000186857	0.000145721	0.000138491	0.000138663	0.000153865	0.000136158	0.409237	0.532629	1.43887
K13689	0	3.31e-06	4.55e-06	4.26e-06	4.55e-06	0	1.33e-05	5.44e-06	3.65e-06	9.37e-06	4.93e-06	0	0	1.82e-05	4.07e-06	1.89e-05	4.81e-06	0	0.409234	0.532629	-0.20111
K07393	9.92e-06	2.64e-05	9.1e-06	2.13e-05	3.64e-05	1.71e-05	1.67e-05	1.63e-05	3.28e-05	9.37e-06	4.93e-06	2.84e-05	2.34e-05	1.21e-05	2.85e-05	1.26e-05	9.62e-06	2.37e-05	0.408222	0.53159	0.437402
K03217	0.000887721	0.000945476	0.000987567	0.00090295	0.000887517	0.000949582	0.00092078	0.000941036	0.000923095	0.00103018	0.000926866	0.000856548	0.000938954	0.000947188	0.000936848	0.000958036	0.000928001	0.000964948	0.408187	0.53159	-5.12031
K09793	4.96e-05	7.27e-05	8.19e-05	5.96e-05	6.37e-05	6.84e-05	5.34e-05	7.07e-05	6.93e-05	5.15e-05	6.41e-05	6.24e-05	5.61e-05	4.86e-05	6.52e-05	7.56e-05	6.73e-05	6.51e-05	0.407377	0.530773	1.48441
K03287	0	3.31e-06	4.55e-06	4.26e-06	4.55e-06	4.28e-06	3.34e-06	5.44e-06	3.65e-06	4.68e-06	0	5.67e-06	4.67e-06	1.21e-05	4.07e-06	6.3e-06	0	5.92e-06	0.406969	0.530382	-0.332019
K09002	9.92e-06	5.29e-05	1.82e-05	4.26e-05	3.64e-05	2.99e-05	3.34e-05	7.62e-05	4.38e-05	2.34e-05	5.42e-05	3.4e-05	3.74e-05	5.46e-05	4.48e-05	5.67e-05	3.37e-05	6.51e-05	0.406909	0.530382	-0.535042
K02956	0.0011704	0.00124631	0.00113775	0.00122239	0.0011515	0.00120623	0.00116432	0.00109334	0.00119674	0.00118003	0.00127691	0.00117988	0.00119121	0.00122042	0.0010957	0.00119754	0.00115399	0.00128462	0.406814	0.530382	-4.84676
K07124	0.000619917	0.000743819	0.000737262	0.000702768	0.000728219	0.000701493	0.000697257	0.000647302	0.000733368	0.000800734	0.000764172	0.000714735	0.000682026	0.000698248	0.000635428	0.000674407	0.000673161	0.000911669	0.406648	0.530382	-2.29754
K22232	0	0	0	4.26e-06	0	4.28e-06	3.34e-06	0	0	0	0	5.67e-06	0	6.07e-06	4.07e-06	0	4.81e-06	0	0.406427	0.530239	-0.161627
K18955	9.92e-06	0	0	0	0	4.28e-06	3.34e-06	0	7.3e-06	9.37e-06	0	1.13e-05	0	0	0	0	9.62e-06	1.18e-05	0.405947	0.529754	-0.168982
K11530	4.96e-06	6.61e-06	0	0	0	4.28e-06	6.67e-06	5.44e-06	7.3e-06	0	0	5.67e-06	0	6.07e-06	0	6.3e-06	0	5.92e-06	0.405944	0.529754	0.228246
K03534	0.000203333	0.000241328	0.000218448	0.000183146	0.00020026	0.000205315	0.00026022	0.000293734	0.000244456	0.000224768	0.000266228	0.000192865	0.000256928	0.000236797	0.000285128	0.000252115	0.000230798	0.000219037	0.405549	0.529518	-1.60694
K05305	1.49e-05	1.98e-05	1.37e-05	2.98e-05	4.55e-05	3.42e-05	3.34e-05	3.81e-05	2.92e-05	9.37e-06	1.48e-05	1.7e-05	3.74e-05	2.43e-05	5.3e-05	2.52e-05	2.88e-05	0	0.404875	0.528779	0.420565
K03210	0.000733981	0.000654561	0.000678099	0.000600547	0.000623538	0.000714325	0.000687249	0.000636423	0.000656747	0.000655572	0.000685289	0.000692045	0.000696041	0.000607172	0.000769845	0.000592469	0.000754902	0.000722231	0.404651	0.528627	-2.80124
K00287	0.000803412	0.000816548	0.000814629	0.000783692	0.000878415	0.000842647	0.000814023	0.000750653	0.000861069	0.000824148	0.000798683	0.000737425	0.000948297	0.000752893	0.000830944	0.000693315	0.000841451	0.000710391	0.403251	0.526939	2.80717
K00020	2.98e-05	3.31e-05	3.19e-05	3.41e-05	2.28e-05	2.14e-05	3.34e-05	2.72e-05	2.19e-05	1.4e-05	3.94e-05	5.67e-05	2.8e-05	3.04e-05	2.44e-05	4.41e-05	9.62e-06	5.33e-05	0.403215	0.526939	-0.552136
K02773	5.95e-05	4.96e-05	4.55e-05	4.26e-05	4.55e-05	4.28e-05	5e-05	5.44e-05	5.84e-05	3.28e-05	2.96e-05	6.81e-05	5.61e-05	3.04e-05	7.33e-05	2.52e-05	4.33e-05	4.14e-05	0.40321	0.526939	0.777074
K00773	0.000986907	0.000955394	0.000987567	0.000988134	0.00107868	0.000966692	0.00092078	0.00089752	0.000963229	0.00101614	0.00102054	0.000969998	0.000920268	0.00102005	0.000932775	0.00100216	0.000990508	0.00104191	0.402805	0.526778	-4.59883
K03058	4.96e-06	9.92e-06	4.55e-06	4.26e-06	4.55e-06	8.55e-06	1.33e-05	1.09e-05	1.09e-05	9.37e-06	9.86e-06	1.7e-05	4.67e-06	1.21e-05	4.07e-06	1.26e-05	4.81e-06	1.18e-05	0.402363	0.526341	-0.485901
K07706	0.000123983	7.27e-05	0.000118326	0.000127776	0.000177503	0.000188206	9.01e-05	6.53e-05	9.85e-05	0.000121749	0.000103533	0.000141813	9.34e-05	9.11e-05	0.000109978	9.45e-05	8.65e-05	0.000100639	0.402209	0.52628	0.744382
K11176	0	9.92e-06	4.55e-06	0	0	0	1.33e-05	0	1.09e-05	4.68e-06	0	5.67e-06	0	6.07e-06	0	0	0	5.92e-06	0.401521	0.52552	0.165737
K02563	0.00107122	0.00105788	0.00103308	0.00103498	0.00110143	0.0010779	0.00102086	0.00100087	0.00106539	0.00111447	0.00109449	0.00110614	0.00106041	0.00103219	0.00100202	0.00102737	0.00110591	0.00105375	0.401406	0.52551	-6.35422
K05352	4.46e-05	4.3e-05	3.64e-05	3.83e-05	3.19e-05	4.71e-05	5.67e-05	3.81e-05	4.38e-05	3.75e-05	3.94e-05	3.4e-05	5.61e-05	3.04e-05	5.7e-05	3.15e-05	2.4e-05	3.55e-05	0.401243	0.525438	0.933688
K14124	0	3.31e-06	4.55e-06	0	0	0	0	0	0	4.68e-06	0	5.67e-06	0	0	0	0	0	5.92e-06	0.401065	0.525345	-0.127522
K16511	0.000183495	0.000211575	0.000191142	0.000242774	0.000300391	0.000307973	0.000240203	0.00022846	0.000269996	0.000173258	0.000177485	0.00018152	0.000275613	0.000151793	0.000378813	0.000126057	0.000283689	0.000189438	0.400629	0.524914	0.768491
K11907	4.96e-06	0	4.55e-06	0	0	4.28e-06	0	0	0	0	0	0	0	0	0	0	0	5.92e-06	0.400025	0.524263	0.111792
K07013	9.92e-06	9.92e-06	9.1e-06	4.26e-06	9.1e-06	3.42e-05	1.33e-05	1.63e-05	1.46e-05	9.37e-06	9.86e-06	1.13e-05	9.34e-06	1.21e-05	1.22e-05	1.26e-05	9.62e-06	1.18e-05	0.399733	0.52402	0.434586
K03599	4.96e-06	3.31e-06	4.55e-06	4.26e-06	4.55e-06	4.28e-06	3.34e-06	5.44e-06	3.65e-06	4.68e-06	0	0	9.34e-06	1.21e-05	8.15e-06	1.26e-05	4.81e-06	0	0.399681	0.52402	-0.301649
K02078	0.00189446	0.00183145	0.00172483	0.00180164	0.00177048	0.00187778	0.00186825	0.00179504	0.00186443	0.00170917	0.0017995	0.00179818	0.00188258	0.00189438	0.00181667	0.00182783	0.00175503	0.0017227	0.399164	0.523555	6.57565
K03077	0.000342194	0.000307445	0.000314019	0.000379069	0.000359558	0.00032936	0.000383658	0.000397084	0.000383103	0.000379295	0.000419062	0.000397075	0.000341013	0.000340016	0.000439911	0.00035296	0.00036543	0.000301916	0.398437	0.522741	-2.07882
K02574	4.96e-06	6.61e-06	9.1e-06	1.28e-05	9.1e-06	4.28e-06	1.67e-05	5.44e-06	1.09e-05	9.37e-06	0	5.67e-06	9.34e-06	6.07e-06	8.15e-06	6.3e-06	1.44e-05	5.92e-06	0.398429	0.522741	0.444466
K03308	0.00110097	0.00106779	0.00107859	0.00100943	0.000960339	0.00112068	0.00121102	0.00115862	0.0011785	0.00109106	0.000951517	0.00104941	0.0010791	0.000983619	0.00120976	0.000939127	0.00124535	0.000982708	0.397982	0.522424	2.46722
K00246	9.92e-06	9.92e-06	2.28e-05	8.52e-06	9.1e-06	1.28e-05	6.67e-06	1.09e-05	7.3e-06	1.4e-05	9.86e-06	0	4.67e-06	1.21e-05	8.15e-06	1.89e-05	9.62e-06	0	0.397523	0.521962	0.383099
K16011	9.92e-06	1.32e-05	2.28e-05	8.52e-06	1.37e-05	1.28e-05	1.67e-05	5.44e-06	2.55e-05	0	9.86e-06	1.7e-05	1.4e-05	1.82e-05	8.15e-06	1.26e-05	1.92e-05	5.92e-06	0.397328	0.521846	0.445683
K10537	4.96e-06	6.61e-06	1.37e-05	4.26e-06	0	8.55e-06	1e-05	1.63e-05	7.3e-06	9.37e-06	4.93e-06	1.13e-05	4.67e-06	6.07e-06	4.07e-06	1.89e-05	1.44e-05	1.78e-05	0.39691	0.521437	-0.372113
K18692	2.98e-05	2.64e-05	1.82e-05	1.28e-05	1.82e-05	2.99e-05	1.67e-05	2.18e-05	2.55e-05	2.34e-05	9.86e-06	3.4e-05	3.27e-05	1.82e-05	2.85e-05	2.52e-05	1.92e-05	3.55e-05	0.396596	0.521165	-0.707308
K18350	6.45e-05	8.26e-05	8.65e-05	5.96e-05	6.37e-05	8.13e-05	7.01e-05	7.62e-05	8.39e-05	6.56e-05	8.38e-05	7.94e-05	7.01e-05	4.86e-05	0.000101831	5.04e-05	6.25e-05	5.33e-05	0.396282	0.520891	1.10096
K12952	0.000188455	0.00024794	0.00022755	0.000259811	0.000273082	0.000205315	0.000220186	0.00022846	0.000218916	0.000295007	0.000251437	0.000289298	0.000191528	0.000224654	0.000179223	0.000245812	0.00022599	0.000301916	0.39592	0.520555	-1.43602
K09741	4.96e-06	1.32e-05	9.1e-06	4.26e-06	4.55e-06	8.55e-06	1e-05	1.09e-05	1.09e-05	9.37e-06	9.86e-06	1.7e-05	4.67e-06	1.21e-05	4.07e-06	1.26e-05	4.81e-06	1.78e-05	0.395825	0.520555	-0.483131
K11358	0.000421543	0.000386786	0.000373182	0.000400365	0.000423278	0.000423462	0.000413684	0.000418842	0.000434183	0.000454218	0.00035497	0.000374385	0.000420427	0.000291443	0.00051323	0.000302538	0.000413513	0.000378875	0.395685	0.520527	1.70644
K15739	4.96e-06	0	0	0	0	0	0	5.44e-06	0	1.4e-05	0	5.67e-06	4.67e-06	0	0	0	0	0	0.395235	0.520074	-0.11347
K01546	1.98e-05	1.65e-05	1.82e-05	4.26e-06	0	8.55e-06	6.67e-06	1.63e-05	7.3e-06	4.68e-06	0	0	9.34e-06	1.21e-05	1.63e-05	2.52e-05	0	0	0.39416	0.518798	0.25218
K05589	9.92e-06	3.31e-06	9.1e-06	4.26e-06	9.1e-06	1.28e-05	1e-05	5.44e-06	1.09e-05	4.68e-06	0	0	9.34e-06	6.07e-06	1.22e-05	1.89e-05	4.81e-06	0	0.393549	0.518134	0.318562
K06166	0	6.61e-06	0	8.52e-06	0	4.28e-06	0	5.44e-06	0	0	0	1.13e-05	4.67e-06	6.07e-06	4.07e-06	6.3e-06	0	5.92e-06	0.393441	0.518131	-0.214991
K06915	0.000119024	0.000195046	0.000177489	0.000208701	0.00020026	0.000158264	0.000186825	0.000146867	0.000211619	0.000182624	0.000152834	0.000260935	0.000205542	0.000200367	0.00015071	0.000207995	0.000144249	0.000230877	0.393431	0.518131	-1.16045
K18120	4.46e-05	4.63e-05	5.46e-05	5.54e-05	3.19e-05	2.99e-05	5.67e-05	5.44e-05	4.74e-05	4.68e-05	4.93e-05	7.94e-05	2.8e-05	6.07e-05	3.67e-05	4.41e-05	4.33e-05	9.47e-05	0.393306	0.518131	-0.671505
K02984	4.96e-06	1.98e-05	1.37e-05	8.52e-06	9.1e-06	8.55e-06	1.33e-05	2.18e-05	1.82e-05	1.4e-05	9.86e-06	3.4e-05	4.67e-06	2.43e-05	4.07e-06	2.52e-05	1.44e-05	1.78e-05	0.39317	0.518131	-0.402558
K13571	4.96e-06	0	0	0	0	0	3.34e-06	0	3.65e-06	4.68e-06	0	5.67e-06	0	0	0	0	4.81e-06	5.92e-06	0.392831	0.517885	-0.166365
K22579	4.96e-06	2.64e-05	9.1e-06	1.7e-05	1.37e-05	8.55e-06	1.67e-05	2.18e-05	1.82e-05	1.4e-05	1.48e-05	5.67e-06	1.87e-05	1.21e-05	1.22e-05	1.26e-05	1.44e-05	1.18e-05	0.392795	0.517885	0.577032
K03801	3.47e-05	4.3e-05	5.46e-05	2.13e-05	2.28e-05	2.14e-05	2.34e-05	4.9e-05	2.19e-05	9.37e-06	2.47e-05	1.13e-05	3.74e-05	4.86e-05	3.67e-05	4.41e-05	1.44e-05	1.18e-05	0.392663	0.517885	0.454328
K10536	4.46e-05	8.6e-05	5.92e-05	9.37e-05	9.56e-05	8.98e-05	8.01e-05	9.79e-05	6.57e-05	7.96e-05	5.92e-05	6.81e-05	5.61e-05	8.5e-05	9.78e-05	8.19e-05	5.77e-05	6.51e-05	0.392659	0.517885	1.01011
K19425	8.43e-05	0.000109093	7.28e-05	9.8e-05	0.00010013	0.000106935	0.00013011	0.000125109	0.000109458	9.37e-05	8.87e-05	0.000147485	0.000107442	0.000127506	0.000138491	8.82e-05	9.62e-05	0.000124318	0.392632	0.517885	-1.17799
K03227	4.96e-06	9.92e-06	4.55e-06	8.52e-06	9.1e-06	0	6.67e-06	5.44e-06	1.09e-05	4.68e-06	1.48e-05	5.67e-06	9.34e-06	1.21e-05	4.07e-06	1.26e-05	4.81e-06	5.92e-06	0.392336	0.517885	-0.443432
K00768	0.000243007	0.000228104	0.000336774	0.000281107	0.000259428	0.000299418	0.000270229	0.00033181	0.000291888	0.000346517	0.000285948	0.000260935	0.000280285	0.000285371	0.00032586	0.000296235	0.000317347	0.000266397	0.392132	0.517801	-1.95017
K07101	6.45e-05	6.61e-05	6.83e-05	4.69e-05	7.28e-05	5.56e-05	7.34e-05	5.98e-05	7.3e-05	6.09e-05	7.89e-05	6.24e-05	5.61e-05	9.11e-05	4.48e-05	0.000126057	5.77e-05	7.1e-05	0.391948	0.517698	-0.827622
K16960	5.46e-05	3.64e-05	4.1e-05	2.56e-05	3.64e-05	6.42e-05	5e-05	3.26e-05	4.38e-05	4.68e-05	3.45e-05	3.4e-05	4.2e-05	4.86e-05	3.67e-05	3.15e-05	4.81e-05	2.37e-05	0.391714	0.517528	0.872035
K01856	0	3.31e-06	1.37e-05	8.52e-06	0	0	0	0	0	0	0	0	0	6.07e-06	0	0	4.81e-06	0	0.39122	0.517014	0.115052
K00688	0.000833168	0.000790101	0.000814629	0.000775174	0.000882966	0.00085548	0.000837376	0.000875762	0.00085742	0.000805417	0.000769102	0.000862221	0.00079414	0.000862184	0.000879823	0.00081307	0.000812602	0.00078143	0.391163	0.517014	4.85629
K02322	4.96e-06	9.92e-06	4.55e-06	4.26e-06	4.55e-06	4.28e-06	6.67e-06	1.09e-05	7.3e-06	4.68e-06	9.86e-06	1.13e-05	0	1.21e-05	4.07e-06	1.26e-05	4.81e-06	1.18e-05	0.391147	0.517014	-0.43062
K03405	3.47e-05	1.98e-05	1.37e-05	3.83e-05	3.19e-05	3.85e-05	3.34e-05	3.26e-05	1.82e-05	1.87e-05	2.96e-05	3.97e-05	2.8e-05	3.04e-05	1.63e-05	2.52e-05	2.4e-05	1.78e-05	0.390824	0.51691	0.72476
K11206	1.49e-05	1.65e-05	3.19e-05	1.7e-05	1.37e-05	2.57e-05	2e-05	3.81e-05	2.19e-05	2.81e-05	2.47e-05	1.13e-05	1.87e-05	3.64e-05	1.22e-05	5.04e-05	3.37e-05	2.37e-05	0.390492	0.51661	-0.515919
K11753	0.000912517	0.000928947	0.000992118	0.000911468	0.000842004	0.000816983	0.000910771	0.00089752	0.000930392	0.000945897	0.000951517	0.000941636	0.000943625	0.000868256	0.000932775	0.000850887	0.000995317	0.000893909	0.388867	0.5146	-4.25017
K02336	4.96e-06	3.31e-06	0	0	0	0	6.67e-06	0	3.65e-06	4.68e-06	0	0	0	1.21e-05	0	1.26e-05	4.81e-06	0	0.38851	0.514267	-0.158381
K04760	1.49e-05	6.61e-06	2.28e-05	8.52e-06	9.1e-06	1.71e-05	6.67e-06	1.63e-05	7.3e-06	1.4e-05	4.93e-06	0	1.4e-05	1.21e-05	8.15e-06	1.89e-05	9.62e-06	5.92e-06	0.387918	0.513621	0.426233
K20485	4.96e-06	9.92e-06	2.28e-05	3.41e-05	3.19e-05	2.99e-05	2e-05	1.63e-05	2.19e-05	1.4e-05	1.48e-05	2.84e-05	1.87e-05	3.64e-05	2.85e-05	3.78e-05	1.92e-05	2.96e-05	0.384795	0.509624	-0.559366
K13889	4.96e-06	6.61e-06	1.82e-05	4.26e-06	9.1e-06	1.28e-05	1.67e-05	1.63e-05	1.09e-05	9.37e-06	1.48e-05	1.13e-05	2.8e-05	6.07e-06	1.63e-05	6.3e-06	1.92e-05	1.18e-05	0.384527	0.509407	-0.455167
K02191	0	9.92e-06	1.37e-05	8.52e-06	4.55e-06	4.28e-06	6.67e-06	0	3.65e-06	4.68e-06	0	5.67e-06	0	1.21e-05	0	6.3e-06	0	5.92e-06	0.382794	0.507249	0.247868
K02899	0.0011704	0.00121325	0.00113775	0.00117554	0.00122887	0.00112496	0.00113096	0.00105526	0.00118579	0.0011613	0.00116844	0.00110614	0.00115851	0.00111112	0.00103461	0.00117864	0.00106263	0.00122543	0.381765	0.506022	4.59709
K02437	0.000307479	0.000254551	0.000286713	0.000200182	0.000168401	0.000226702	0.000283573	0.000299173	0.000277293	0.000206037	0.000261297	0.000221228	0.000214885	0.000309658	0.000158857	0.000271023	0.000192332	0.000284156	0.381191	0.505398	1.15601
K03293	1.49e-05	2.64e-05	1.37e-05	2.13e-05	2.73e-05	1.71e-05	1.67e-05	1.63e-05	1.82e-05	1.87e-05	9.86e-06	1.7e-05	2.34e-05	1.82e-05	8.15e-06	1.89e-05	1.44e-05	2.37e-05	0.381044	0.50534	0.798843
K02990	0.0013043	0.00128267	0.00128338	0.0012522	0.00134266	0.0013816	0.00124439	0.00116406	0.00125147	0.0012971	0.00140509	0.00121392	0.00126128	0.00118399	0.00114866	0.00121645	0.00118284	0.00132014	0.380385	0.504602	3.9688
K19138	2.48e-05	4.63e-05	2.73e-05	3.83e-05	2.73e-05	2.99e-05	3.34e-05	7.62e-05	3.65e-05	2.34e-05	4.93e-05	3.97e-05	3.74e-05	6.68e-05	5.3e-05	4.41e-05	3.37e-05	4.74e-05	0.378438	0.502156	-0.65417
K01595	4.96e-06	0	4.55e-06	4.26e-06	4.55e-06	4.28e-06	3.34e-06	0	3.65e-06	4.68e-06	0	5.67e-06	4.67e-06	6.07e-06	0	6.3e-06	4.81e-06	5.92e-06	0.378349	0.502156	-0.387403
K03110	0.00105138	0.00107771	0.00101942	0.00101795	0.0010104	0.0010608	0.00103754	0.000946475	0.000999715	0.00108638	0.00109449	0.00103807	0.00110713	0.00104434	0.000936848	0.00101476	0.000995317	0.00108927	0.378248	0.502156	-4.91112
K03981	1.49e-05	1.32e-05	1.82e-05	1.28e-05	1.37e-05	1.71e-05	1.33e-05	1.63e-05	1.46e-05	2.34e-05	1.48e-05	5.67e-06	1.87e-05	2.43e-05	2.04e-05	3.78e-05	1.92e-05	0	0.377826	0.501752	-0.483692
K21471	0.000109105	6.28e-05	9.1e-05	8.94e-05	0.00013199	0.00011549	0.000120102	0.000146867	8.76e-05	8.43e-05	5.92e-05	8.51e-05	0.000126128	6.07e-05	0.000179223	3.78e-05	0.000129824	4.74e-05	0.377733	0.501752	0.59656
K09013	0.000729022	0.000757042	0.000709956	0.0007411	0.000805593	0.000731435	0.000710602	0.000679939	0.000722422	0.000782004	0.000774032	0.000686373	0.000710055	0.000716463	0.000651721	0.000712224	0.00062027	0.000757751	0.377148	0.501124	3.61758
K15586	2.98e-05	2.31e-05	2.73e-05	2.56e-05	3.19e-05	2.57e-05	2.34e-05	5.44e-05	2.92e-05	2.81e-05	1.48e-05	2.84e-05	3.74e-05	3.64e-05	2.44e-05	2.52e-05	2.88e-05	1.18e-05	0.376278	0.500103	0.709124
K13954	4.96e-06	1.32e-05	1.82e-05	2.98e-05	1.37e-05	2.99e-05	2e-05	2.72e-05	1.82e-05	3.28e-05	9.86e-06	3.4e-05	2.34e-05	2.43e-05	4.89e-05	1.26e-05	1.92e-05	1.18e-05	0.375698	0.499468	-0.463806
K08077	4.96e-06	3.31e-06	9.1e-06	4.26e-06	4.55e-06	4.28e-06	3.34e-06	0	7.3e-06	4.68e-06	0	5.67e-06	9.34e-06	6.07e-06	4.07e-06	1.89e-05	9.62e-06	0	0.375623	0.499468	-0.28452
K03177	0.00105634	0.00110085	0.000987567	0.00103073	0.00113329	0.00106935	0.00108759	0.000951915	0.00106904	0.00112384	0.00108463	0.00102105	0.00108844	0.00103826	0.00105905	0.00103997	0.00106744	0.00116031	0.375245	0.499137	-4.82621
K02978	4.96e-06	1.32e-05	9.1e-06	4.26e-06	4.55e-06	8.55e-06	1.33e-05	1.09e-05	1.09e-05	9.37e-06	9.86e-06	1.7e-05	4.67e-06	1.21e-05	4.07e-06	1.89e-05	4.81e-06	1.78e-05	0.374102	0.497753	-0.469465
K05966	1.49e-05	2.98e-05	3.19e-05	1.7e-05	1.82e-05	2.14e-05	2.67e-05	1.63e-05	2.55e-05	2.81e-05	2.47e-05	2.27e-05	9.34e-06	1.21e-05	1.63e-05	2.52e-05	1.44e-05	2.37e-05	0.373	0.496421	0.749899
K02554	0	0	0	0	0	0	6.67e-06	0	0	0	0	5.67e-06	0	0	0	0	4.81e-06	5.92e-06	0.372562	0.495972	-0.118483
K04069	0.00150268	0.00160665	0.00138806	0.00126498	0.00142913	0.00138588	0.00155131	0.0015557	0.00148133	0.00161552	0.00146918	0.00150889	0.00156025	0.00137221	0.0015071	0.00138033	0.00170694	0.00146222	0.371883	0.495203	-3.21486
K07731	4.96e-06	6.61e-06	4.55e-06	4.26e-06	4.55e-06	8.55e-06	6.67e-06	1.09e-05	7.3e-06	4.68e-06	9.86e-06	1.13e-05	4.67e-06	1.21e-05	4.07e-06	1.26e-05	4.81e-06	5.92e-06	0.371877	0.495203	-0.551653
K09148	4.96e-06	6.61e-06	4.55e-06	4.26e-06	4.55e-06	8.55e-06	6.67e-06	1.09e-05	7.3e-06	4.68e-06	9.86e-06	1.13e-05	4.67e-06	1.21e-05	4.07e-06	1.26e-05	4.81e-06	5.92e-06	0.371877	0.495203	-0.551653
K09737	4.96e-06	6.61e-06	4.55e-06	4.26e-06	4.55e-06	8.55e-06	6.67e-06	1.09e-05	7.3e-06	4.68e-06	9.86e-06	1.13e-05	4.67e-06	1.21e-05	4.07e-06	1.26e-05	4.81e-06	5.92e-06	0.371877	0.495203	-0.551653
K13831	4.96e-06	6.61e-06	4.55e-06	4.26e-06	4.55e-06	8.55e-06	6.67e-06	1.09e-05	7.3e-06	4.68e-06	9.86e-06	1.13e-05	4.67e-06	1.21e-05	4.07e-06	1.26e-05	4.81e-06	5.92e-06	0.371877	0.495203	-0.551653
K13921	1.98e-05	1.98e-05	4.1e-05	4.26e-05	2.73e-05	1.71e-05	3.67e-05	2.72e-05	3.65e-05	3.75e-05	4.44e-05	3.97e-05	4.2e-05	1.82e-05	4.48e-05	6.3e-06	6.73e-05	2.37e-05	0.371538	0.495203	-0.531338
K09812	0.000848046	0.000833077	0.000814629	0.000843321	0.000873863	0.00093675	0.000830703	0.000875762	0.000839177	0.000866291	0.000808543	0.000782806	0.000929611	0.000819682	0.00085131	0.000800464	0.000855876	0.00082287	0.37128	0.495203	4.84681
K01792	2.98e-05	2.64e-05	2.28e-05	2.98e-05	2.73e-05	1.71e-05	3.34e-05	2.72e-05	2.92e-05	1.87e-05	2.47e-05	3.4e-05	9.34e-06	3.64e-05	8.15e-06	3.15e-05	1.92e-05	2.96e-05	0.370892	0.494826	0.728163
K13767	0	0	4.55e-06	4.26e-06	0	0	0	0	3.65e-06	4.68e-06	0	5.67e-06	0	0	0	6.3e-06	0	5.92e-06	0.370728	0.494742	-0.174444
K00140	4.46e-05	2.64e-05	2.28e-05	2.98e-05	1.82e-05	1.71e-05	2e-05	5.44e-05	2.19e-05	4.21e-05	3.45e-05	3.97e-05	3.27e-05	3.04e-05	4.07e-05	2.52e-05	3.37e-05	1.78e-05	0.370118	0.494062	-0.669718
K19005	0.000133902	8.93e-05	0.000131979	0.000102221	8.65e-05	0.000119767	8.34e-05	0.000119669	9.12e-05	0.000103018	7.4e-05	7.37e-05	0.000135471	7.89e-05	0.000101831	8.82e-05	0.000129824	8.88e-05	0.369599	0.493504	1.10035
K08310	4.46e-05	5.62e-05	3.19e-05	4.69e-05	3.19e-05	2.99e-05	4.67e-05	1.63e-05	5.47e-05	5.62e-05	3.94e-05	5.11e-05	3.27e-05	6.07e-05	4.07e-05	5.67e-05	2.4e-05	4.74e-05	0.368961	0.492788	-0.782028
K21744	0	0	0	0	0	0	3.34e-06	0	3.65e-06	4.68e-06	4.93e-06	5.67e-06	0	0	0	0	0	0	0.368928	0.492788	-0.136243
K07270	2.48e-05	1.32e-05	2.73e-05	1.28e-05	1.82e-05	2.14e-05	2e-05	1.63e-05	2.19e-05	1.87e-05	1.48e-05	2.27e-05	2.34e-05	4.25e-05	2.04e-05	3.15e-05	1.92e-05	1.18e-05	0.368704	0.492713	-0.664451
K20340	0	3.31e-06	4.55e-06	8.52e-06	1.37e-05	4.28e-06	3.34e-06	5.44e-06	3.65e-06	9.37e-06	4.93e-06	5.67e-06	0	6.07e-06	0	1.26e-05	9.62e-06	1.78e-05	0.368504	0.49258	-0.297521
K05311	2.48e-05	3.31e-05	2.73e-05	5.11e-05	3.19e-05	2.99e-05	4.34e-05	3.26e-05	3.65e-05	2.34e-05	2.96e-05	5.67e-05	1.87e-05	6.68e-05	2.44e-05	8.19e-05	3.85e-05	3.55e-05	0.368267	0.492397	-0.537601
K06962	7.44e-05	8.6e-05	6.37e-05	8.09e-05	8.19e-05	6.84e-05	8.67e-05	5.44e-05	6.57e-05	7.02e-05	0.000108463	9.64e-05	4.2e-05	0.000145721	6.11e-05	0.000113452	5.77e-05	6.51e-05	0.368112	0.492324	-0.738206
K01075	4.96e-06	3.31e-06	0	0	0	4.28e-06	0	5.44e-06	0	0	4.93e-06	5.67e-06	0	6.07e-06	0	6.3e-06	0	5.92e-06	0.36753	0.491681	-0.219371
K16087	9.92e-06	3.31e-06	9.1e-06	8.52e-06	9.1e-06	8.55e-06	6.67e-06	5.44e-06	7.3e-06	9.37e-06	0	0	9.34e-06	1.21e-05	4.07e-06	1.26e-05	4.81e-06	0	0.367098	0.491237	0.393192
K02195	9.92e-06	9.92e-06	4.55e-06	8.52e-06	9.1e-06	8.55e-06	1e-05	1.63e-05	7.3e-06	1.87e-05	9.86e-06	1.13e-05	9.34e-06	0	8.15e-06	1.89e-05	1.44e-05	1.18e-05	0.366226	0.490204	-0.523169
K07166	0.000659591	0.000674396	0.000659895	0.000707027	0.000719117	0.000710048	0.000703929	0.000712576	0.000718773	0.000697716	0.000739521	0.000675028	0.000644655	0.000698248	0.000761698	0.000718527	0.000798177	0.000680792	0.365645	0.48956	-4.3736
K07562	4.96e-06	9.92e-06	4.55e-06	4.26e-06	4.55e-06	8.55e-06	1.67e-05	1.09e-05	3.65e-06	4.68e-06	9.86e-06	1.7e-05	4.67e-06	1.21e-05	4.07e-06	1.26e-05	4.81e-06	1.78e-05	0.365415	0.489386	-0.409542
K12269	4.96e-06	3.31e-06	0	0	4.55e-06	1.28e-05	6.67e-06	0	1.46e-05	0	0	0	9.34e-06	0	8.15e-06	0	4.81e-06	5.92e-06	0.365257	0.489309	0.207101
K06001	0.000357072	0.000419844	0.000377733	0.000327958	0.000327699	0.000372134	0.000447045	0.000435161	0.000419589	0.000412074	0.000399341	0.000419765	0.000345685	0.000412877	0.000427692	0.000397081	0.00042313	0.000390715	0.364902	0.488967	-2.54416
K07308	1.49e-05	6.61e-06	9.1e-06	1.7e-05	9.1e-06	1.28e-05	6.67e-06	5.44e-06	1.09e-05	1.4e-05	4.93e-06	0	4.67e-06	6.07e-06	0	0	2.88e-05	5.92e-06	0.364888	0.488967	0.287582
K00172	0.000178536	0.000211575	0.000200244	0.000208701	0.000213914	0.000320805	0.000186825	0.000206701	0.000171484	0.000201354	0.000202136	0.000192865	0.000224228	0.000170008	0.000215882	0.000195389	0.00016829	0.000195358	0.364427	0.488597	1.42016
K03783	0.000560405	0.000489268	0.000577977	0.000515363	0.000505202	0.000496178	0.000527113	0.000522193	0.000510803	0.000524458	0.000537385	0.000504853	0.000504513	0.000516096	0.000549889	0.000485321	0.00045198	0.000515034	0.364097	0.488289	4.18104
K02250	5.46e-05	5.95e-05	5.92e-05	6.39e-05	5.01e-05	4.71e-05	4.67e-05	2.72e-05	4.38e-05	4.21e-05	2.96e-05	3.97e-05	5.61e-05	7.29e-05	1.63e-05	6.3e-05	1.44e-05	5.33e-05	0.363898	0.488156	0.67165
K02528	0.00118032	0.00116366	0.00111499	0.00115424	0.0011515	0.00116345	0.00115765	0.00104439	0.00109823	0.00118939	0.00121281	0.00112883	0.00110713	0.00110505	0.00112422	0.00115973	0.00113476	0.00125503	0.363556	0.487831	-5.67698
K07096	3.47e-05	2.64e-05	2.73e-05	1.7e-05	2.28e-05	2.14e-05	3.67e-05	3.26e-05	3.28e-05	1.87e-05	3.45e-05	2.27e-05	9.34e-06	3.64e-05	1.22e-05	3.78e-05	1.44e-05	2.96e-05	0.363541	0.487831	0.671836
K02987	9.92e-06	1.32e-05	9.1e-06	4.26e-06	1.82e-05	1.28e-05	1.33e-05	1.63e-05	1.09e-05	9.37e-06	1.48e-05	2.84e-05	9.34e-06	1.21e-05	8.15e-06	1.89e-05	4.81e-06	2.96e-05	0.36278	0.487056	-0.460502
K13006	0	0	4.55e-06	4.26e-06	0	4.28e-06	6.67e-06	0	3.65e-06	0	4.93e-06	0	4.67e-06	0	4.07e-06	0	0	0	0.36258	0.486922	0.19812
K06165	0	3.31e-06	0	4.26e-06	0	8.55e-06	0	5.44e-06	0	0	0	1.13e-05	4.67e-06	6.07e-06	8.15e-06	6.3e-06	0	0	0.361633	0.485783	-0.203123
K21562	9.92e-06	6.61e-06	0	8.52e-06	9.1e-06	2.14e-05	6.67e-06	1.63e-05	1.09e-05	9.37e-06	0	5.67e-06	4.67e-06	6.07e-06	0	1.26e-05	9.62e-06	1.78e-05	0.361376	0.485572	0.343666
K10798	1.49e-05	1.98e-05	9.1e-06	1.28e-05	3.19e-05	1.71e-05	1e-05	5.44e-06	7.3e-06	3.75e-05	1.48e-05	1.13e-05	2.34e-05	3.04e-05	2.04e-05	6.3e-06	9.62e-06	1.18e-05	0.361376	0.485572	-0.413333
K05813	5.46e-05	7.6e-05	7.28e-05	9.8e-05	8.19e-05	5.13e-05	8.01e-05	0.000130548	8.76e-05	5.15e-05	6.9e-05	5.11e-05	7.01e-05	0.000109291	6.92e-05	0.000107149	4.81e-05	6.51e-05	0.361283	0.485572	0.778372
K03310	0.00130926	0.00138185	0.00137895	0.00123943	0.00116515	0.00117628	0.00136783	0.00139795	0.00134633	0.00125495	0.00127691	0.00115719	0.00129865	0.00119006	0.00144193	0.00117864	0.00142326	0.00113663	0.361237	0.485572	2.98848
K03893	5.95e-05	8.6e-05	9.1e-05	8.09e-05	7.28e-05	4.71e-05	7.67e-05	8.7e-05	9.12e-05	9.37e-05	8.38e-05	7.94e-05	7.94e-05	5.46e-05	3.26e-05	4.41e-05	8.65e-05	6.51e-05	0.35987	0.484079	0.945217
K01647	0.000451299	0.000459515	0.0004551	0.000481289	0.000587127	0.000530397	0.000487079	0.000592907	0.000488912	0.00052914	0.000488084	0.000510525	0.000537212	0.000461451	0.000708746	0.000466412	0.000658736	0.000467674	0.359821	0.484079	-1.67373
K11631	0	0	0	4.26e-06	0	0	3.34e-06	0	0	0	0	0	4.67e-06	6.07e-06	0	6.3e-06	0	0	0.359412	0.483729	-0.137592
K00808	0	1.32e-05	9.1e-06	0	0	8.55e-06	0	0	3.65e-06	0	4.93e-06	0	4.67e-06	1.21e-05	0	1.26e-05	9.62e-06	1.18e-05	0.359297	0.483707	-0.224226
K19333	0	0	4.55e-06	0	0	4.28e-06	3.34e-06	5.44e-06	0	0	4.93e-06	0	9.34e-06	0	4.07e-06	6.3e-06	4.81e-06	0	0.359284	0.483707	-0.209629
K03389	0.000208292	0.00023141	0.000222999	0.000238515	0.000191158	0.000205315	0.000210178	0.000244778	0.000193376	0.000271594	0.000216926	0.0002269	0.000219556	0.000230725	0.000207736	0.000226903	0.000240415	0.000189438	0.358997	0.483569	-2.49435
K03825	0	0	0	0	0	0	3.34e-06	0	0	0	4.93e-06	0	0	0	0	0	0	5.92e-06	0.358913	0.483569	-0.0998034
K13598	0	3.31e-06	0	8.52e-06	4.55e-06	4.28e-06	3.34e-06	0	3.65e-06	0	0	0	0	6.07e-06	4.07e-06	6.3e-06	0	0	0.358873	0.483569	0.207782
K22373	3.97e-05	5.62e-05	7.74e-05	7.24e-05	2.73e-05	2.57e-05	5.67e-05	3.81e-05	4.01e-05	5.15e-05	4.93e-05	8.51e-05	5.61e-05	6.07e-05	2.85e-05	6.93e-05	4.33e-05	5.92e-05	0.35881	0.483569	-0.713146
K13288	9.92e-06	6.61e-06	1.37e-05	8.52e-06	9.1e-06	2.14e-05	1.33e-05	5.44e-06	1.46e-05	2.34e-05	9.86e-06	1.13e-05	9.34e-06	1.21e-05	1.22e-05	1.26e-05	1.92e-05	1.18e-05	0.358266	0.483117	-0.618609
K03931	1.98e-05	2.98e-05	2.28e-05	1.7e-05	2.28e-05	2.57e-05	3e-05	4.9e-05	3.65e-05	2.34e-05	3.45e-05	2.84e-05	2.34e-05	2.43e-05	2.85e-05	3.78e-05	4.33e-05	4.74e-05	0.358185	0.483117	-0.767033
K16951	0	1.98e-05	9.1e-06	4.26e-06	1.37e-05	4.28e-06	3.34e-06	1.09e-05	1.09e-05	1.87e-05	9.86e-06	0	1.4e-05	1.21e-05	1.22e-05	6.3e-06	1.44e-05	1.18e-05	0.358077	0.483117	-0.40333
K00917	7.44e-05	3.97e-05	3.64e-05	6.81e-05	6.37e-05	4.28e-05	8.67e-05	5.98e-05	9.85e-05	2.81e-05	7.4e-05	5.67e-05	6.07e-05	5.46e-05	7.33e-05	3.78e-05	5.77e-05	5.33e-05	0.357463	0.482432	0.766633
K07142	4.96e-06	1.32e-05	4.55e-06	4.26e-06	4.55e-06	0	1.33e-05	1.09e-05	7.3e-06	4.68e-06	9.86e-06	1.7e-05	4.67e-06	1.21e-05	4.07e-06	1.26e-05	4.81e-06	1.18e-05	0.356823	0.481701	-0.414823
K22441	2.98e-05	9.92e-06	1.82e-05	1.7e-05	2.28e-05	1.71e-05	1.67e-05	1.09e-05	1.46e-05	0	9.86e-06	2.27e-05	4.67e-06	1.21e-05	4.07e-06	6.3e-06	4.81e-06	4.74e-05	0.356411	0.481277	0.318103
K08600	0.00122	0.0011835	0.00112865	0.00129054	0.0013108	0.00123617	0.00115765	0.0010879	0.00125877	0.00118939	0.00114379	0.0012593	0.00119588	0.00110505	0.00123827	0.00104628	0.00120207	0.00120766	0.356278	0.481231	4.00259
K12349	0	6.61e-06	0	0	0	4.28e-06	0	0	0	9.37e-06	0	0	0	0	0	0	4.81e-06	1.18e-05	0.355968	0.480945	-0.130606
K00980	0.000262845	0.000204963	0.000245754	0.000289625	0.000282185	0.000333637	0.000256884	0.000288294	0.000255402	0.00022945	0.000187345	0.000192865	0.000322327	0.000303586	0.000285128	0.000226903	0.000283689	0.000213117	0.35554	0.480499	1.42563
K00737	4.96e-05	3.97e-05	4.1e-05	2.98e-05	3.19e-05	2.99e-05	6.01e-05	3.81e-05	6.57e-05	3.75e-05	4.44e-05	5.11e-05	3.27e-05	4.25e-05	3.26e-05	3.78e-05	4.33e-05	1.78e-05	0.355324	0.48034	0.843423
K02889	4.96e-06	1.65e-05	1.37e-05	1.28e-05	9.1e-06	8.55e-06	1.67e-05	2.18e-05	1.46e-05	4.68e-06	9.86e-06	2.84e-05	4.67e-06	6.07e-06	4.07e-06	6.3e-06	9.62e-06	1.78e-05	0.354735	0.479676	0.414504
K10979	1.98e-05	4.3e-05	1.37e-05	1.28e-05	2.73e-05	4.28e-06	1.33e-05	5.44e-06	1.82e-05	4.68e-06	9.86e-06	2.84e-05	4.67e-06	1.21e-05	1.22e-05	1.89e-05	0	2.37e-05	0.354164	0.479036	0.338574
K06426	2.48e-05	3.31e-05	4.1e-05	2.98e-05	3.19e-05	1.71e-05	1.33e-05	3.26e-05	1.46e-05	2.81e-05	4.93e-05	4.54e-05	2.8e-05	3.04e-05	1.63e-05	2.52e-05	1.44e-05	4.74e-05	0.353758	0.47862	-0.608877
K16294	0	0	0	4.26e-06	4.55e-06	4.28e-06	3.34e-06	0	0	4.68e-06	4.93e-06	0	0	6.07e-06	0	6.3e-06	4.81e-06	0	0.353464	0.478354	-0.225268
K01597	0	6.61e-06	4.55e-06	8.52e-06	9.1e-06	1.28e-05	3.34e-06	0	0	9.37e-06	4.93e-06	1.13e-05	0	1.82e-05	4.07e-06	6.3e-06	4.81e-06	5.92e-06	0.353173	0.478092	-0.297147
K06386	4.46e-05	7.6e-05	6.83e-05	5.54e-05	7.28e-05	3.42e-05	4.34e-05	3.81e-05	6.2e-05	6.09e-05	5.42e-05	0.000102105	7.01e-05	6.68e-05	2.85e-05	7.56e-05	3.37e-05	8.29e-05	0.352998	0.477988	-0.723266
K07068	1.49e-05	2.98e-05	2.28e-05	1.7e-05	4.1e-05	1.71e-05	3e-05	2.72e-05	3.65e-05	3.75e-05	1.97e-05	3.97e-05	3.27e-05	3.64e-05	2.44e-05	3.15e-05	2.4e-05	2.37e-05	0.352352	0.477244	-0.824036
K19167	0.000143821	0.000145458	0.00013653	0.000166109	0.000186606	0.000188206	0.000143455	0.000163185	0.00015689	0.000168576	0.000138044	0.000170175	0.000196199	0.000109291	0.00016293	8.82e-05	0.000125016	0.000159838	0.351981	0.476874	1.33319
K00640	0.0010613	0.000981841	0.00106038	0.00108184	0.00104226	0.00101802	0.00101086	0.00112598	0.00098877	0.00101614	0.00103533	0.000935963	0.00105107	0.00103826	0.00104275	0.00102737	0.00100012	0.00105375	0.351124	0.475845	5.93779
K02194	9.92e-06	9.92e-06	9.1e-06	8.52e-06	9.1e-06	4.28e-06	6.67e-06	1.63e-05	7.3e-06	1.4e-05	1.48e-05	0	4.67e-06	6.07e-06	8.15e-06	6.3e-06	4.81e-06	5.92e-06	0.350716	0.475424	0.485804
K00555	4.96e-06	1.65e-05	9.1e-06	4.26e-06	4.55e-06	8.55e-06	1.33e-05	1.63e-05	7.3e-06	9.37e-06	1.48e-05	1.7e-05	4.67e-06	2.43e-05	4.07e-06	1.26e-05	4.81e-06	1.78e-05	0.350356	0.475067	-0.431746
K05770	0.000401706	0.000459515	0.000350427	0.000430179	0.000355007	0.000457682	0.000380322	0.000310052	0.0003904	0.000379295	0.000409202	0.000380058	0.00042977	0.000412877	0.000427692	0.000441201	0.000384663	0.000432155	0.349732	0.474353	-2.45292
K02495	1.49e-05	1.65e-05	9.1e-06	2.13e-05	2.28e-05	1.28e-05	2e-05	1.63e-05	1.46e-05	2.34e-05	4.93e-06	0	1.4e-05	1.21e-05	2.04e-05	2.52e-05	1.44e-05	5.92e-06	0.349684	0.474353	0.526995
K12684	0	3.31e-06	0	4.26e-06	4.55e-06	0	0	0	0	4.68e-06	0	0	0	0	0	0	0	0	0.34942	0.474192	0.123937
K00675	2.98e-05	5.29e-05	6.37e-05	5.54e-05	4.55e-05	5.99e-05	4.34e-05	5.44e-05	4.38e-05	7.02e-05	5.92e-05	6.81e-05	4.2e-05	6.07e-05	5.3e-05	5.67e-05	4.81e-05	3.55e-05	0.349125	0.473923	-1.15841
K03673	9.92e-06	1.32e-05	2.28e-05	4.26e-06	4.55e-06	8.55e-06	6.67e-06	1.09e-05	7.3e-06	4.68e-06	0	0	9.34e-06	6.07e-06	1.22e-05	1.26e-05	9.62e-06	1.18e-05	0.348471	0.473166	0.389664
K09118	6.45e-05	3.31e-05	2.73e-05	1.7e-05	4.55e-05	7.27e-05	2e-05	1.63e-05	3.28e-05	8.43e-05	3.45e-05	2.84e-05	6.54e-05	4.25e-05	3.67e-05	3.15e-05	2.88e-05	5.92e-05	0.348006	0.472666	-0.497878
K22452	0	0	9.1e-06	0	0	0	0	0	0	4.68e-06	0	5.67e-06	0	0	0	0	4.81e-06	5.92e-06	0.348002	0.472666	-0.139063
K01205	6.45e-05	6.94e-05	8.19e-05	6.39e-05	5.01e-05	8.55e-05	4e-05	5.98e-05	5.47e-05	5.62e-05	5.92e-05	5.67e-05	6.07e-05	4.25e-05	7.74e-05	3.15e-05	8.65e-05	2.96e-05	0.34735	0.472037	0.852175
K20490	1.49e-05	9.92e-06	1.82e-05	1.7e-05	9.1e-06	2.99e-05	1e-05	2.72e-05	1.09e-05	1.87e-05	9.86e-06	1.7e-05	1.4e-05	1.21e-05	1.22e-05	1.26e-05	1.92e-05	5.92e-06	0.347305	0.472037	0.582391
K07278	4.96e-06	6.61e-06	9.1e-06	8.52e-06	9.1e-06	8.55e-06	0	5.44e-06	0	0	0	0	0	1.21e-05	8.15e-06	1.26e-05	0	0	0.346841	0.471607	0.242991
K17316	0	6.61e-06	4.55e-06	8.52e-06	9.1e-06	4.28e-06	1.33e-05	0	3.65e-06	9.37e-06	4.93e-06	5.67e-06	9.34e-06	6.07e-06	1.22e-05	6.3e-06	4.81e-06	5.92e-06	0.346803	0.471607	-0.435465
K13052	0.000128943	0.000102482	0.000122877	9.8e-05	9.56e-05	0.000111212	9.34e-05	0.000119669	8.39e-05	7.49e-05	6.9e-05	6.81e-05	0.000116785	7.89e-05	0.000171077	7.56e-05	0.000134632	4.14e-05	0.346637	0.471592	0.788926
K02407	0.000133902	0.000119011	9.56e-05	0.000153331	0.000223017	0.000205315	0.000213514	0.000244778	0.000200673	0.000112384	0.000147904	0.000187193	0.000158828	0.000145721	0.000232175	0.000144966	0.000173099	9.47e-05	0.346124	0.471026	0.864274
K06953	9.92e-06	1.65e-05	9.1e-06	8.52e-06	9.1e-06	1.71e-05	1.33e-05	2.18e-05	1.46e-05	9.37e-06	1.97e-05	1.7e-05	9.34e-06	3.04e-05	8.15e-06	2.52e-05	9.62e-06	1.78e-05	0.34562	0.47047	-0.557586
K07732	9.92e-06	1.32e-05	1.37e-05	8.52e-06	4.55e-06	1.71e-05	1.33e-05	1.09e-05	7.3e-06	4.68e-06	1.48e-05	2.27e-05	9.34e-06	1.82e-05	4.07e-06	1.89e-05	4.81e-06	2.96e-05	0.345504	0.470443	-0.439664
K19712	4.96e-06	9.92e-06	4.55e-06	8.52e-06	4.55e-06	8.55e-06	1.33e-05	1.09e-05	1.09e-05	4.68e-06	9.86e-06	1.13e-05	9.34e-06	1.21e-05	4.07e-06	1.26e-05	9.62e-06	1.78e-05	0.345428	0.470443	-0.61391
K01829	0	0	0	0	0	0	0	0	3.65e-06	0	0	0	0	6.07e-06	0	6.3e-06	0	0	0.344977	0.469987	-0.102657
K19504	9.92e-06	6.61e-06	0	8.52e-06	9.1e-06	8.55e-06	6.67e-06	0	7.3e-06	4.68e-06	4.93e-06	2.27e-05	0	6.07e-06	8.15e-06	6.3e-06	1.44e-05	1.18e-05	0.344639	0.469656	-0.339579
K01000	0.00111089	0.00105126	0.00101942	0.00108184	0.00111964	0.00108646	0.00105756	0.00103351	0.00107634	0.00105828	0.00110928	0.00104374	0.00113515	0.00108684	0.00104683	0.00106518	0.00108187	0.00116623	0.343805	0.468651	-6.97129
K20345	2.48e-05	2.31e-05	2.73e-05	2.13e-05	3.19e-05	3.42e-05	4.67e-05	2.72e-05	2.92e-05	9.37e-06	2.47e-05	0	4.2e-05	3.64e-05	4.48e-05	2.52e-05	2.88e-05	0	0.34347	0.468324	0.49264
K01812	0.000441381	0.00043968	0.000341325	0.000408883	0.000455137	0.000414908	0.000407011	0.000478677	0.00041594	0.000398026	0.000384551	0.00038573	0.000490498	0.000358231	0.000484717	0.000315143	0.000432746	0.000343356	0.342976	0.467781	1.9844
K03056	4.96e-06	9.92e-06	9.1e-06	4.26e-06	4.55e-06	8.55e-06	1e-05	1.09e-05	1.09e-05	9.37e-06	9.86e-06	1.13e-05	4.67e-06	1.21e-05	4.07e-06	1.26e-05	9.62e-06	1.18e-05	0.341657	0.466113	-0.732857
K01090	2.48e-05	3.97e-05	2.28e-05	2.98e-05	5.46e-05	3.42e-05	1.33e-05	4.35e-05	1.09e-05	4.21e-05	2.47e-05	6.81e-05	1.87e-05	6.68e-05	1.63e-05	3.78e-05	1.92e-05	5.33e-05	0.341261	0.465701	-0.47957
K02835	0.00104146	0.00105126	0.00103763	0.00101369	0.00105592	0.000979524	0.00098083	0.00089208	0.00101796	0.00102082	0.00105505	0.000987016	0.00105574	0.00103826	0.000957215	0.00102737	0.00103378	0.00108335	0.341133	0.465658	-5.5254
K18431	3.97e-05	2.31e-05	1.37e-05	2.98e-05	4.1e-05	3.85e-05	3.67e-05	3.26e-05	3.28e-05	3.28e-05	2.47e-05	2.84e-05	2.34e-05	3.04e-05	2.44e-05	3.15e-05	3.85e-05	2.37e-05	0.3409	0.465469	1.0298
K01265	0.00142333	0.00134549	0.00122877	0.00133313	0.001329	0.00150564	0.00133446	0.00120757	0.00134633	0.0012409	0.00139523	0.00125362	0.00139675	0.00122042	0.00130751	0.0013299	0.00131266	0.00127278	0.340695	0.465319	4.17392
K03286	4.46e-05	3.97e-05	5.01e-05	3.41e-05	4.1e-05	2.99e-05	5.67e-05	8.7e-05	5.84e-05	2.81e-05	2.47e-05	4.54e-05	8.41e-05	9.11e-05	7.33e-05	0.000113452	5.77e-05	2.96e-05	0.340354	0.464982	-0.531357
K18210	4.96e-06	9.92e-06	4.55e-06	4.26e-06	4.55e-06	4.28e-06	6.67e-06	5.44e-06	3.65e-06	4.68e-06	4.93e-06	1.13e-05	4.67e-06	6.07e-06	4.07e-06	6.3e-06	4.81e-06	1.18e-05	0.340208	0.464913	-0.588373
K01494	4.46e-05	7.27e-05	5.01e-05	7.67e-05	6.83e-05	5.56e-05	8.34e-05	7.07e-05	8.76e-05	6.09e-05	6.41e-05	7.94e-05	4.2e-05	7.29e-05	4.07e-05	7.56e-05	3.85e-05	7.1e-05	0.339587	0.464194	1.02078
K00383	0	6.61e-06	4.55e-06	0	1.37e-05	8.55e-06	6.67e-06	5.44e-06	1.09e-05	1.4e-05	9.86e-06	1.7e-05	0	6.07e-06	0	0	1.44e-05	2.37e-05	0.33905	0.463589	-0.282932
K06153	0.00119024	0.00119672	0.00118781	0.00119257	0.00124252	0.00121906	0.00117433	0.0010879	0.00118214	0.00117535	0.00121281	0.00120257	0.00119588	0.00119006	0.0012179	0.00118494	0.00120207	0.00122543	0.338568	0.46306	-9.2115
K00874	0.000714144	0.000757042	0.000673548	0.000775174	0.0006645	0.000697216	0.000683912	0.000788729	0.000740665	0.000660255	0.000739521	0.00072608	0.000742755	0.00077718	0.000855383	0.00076895	0.000798177	0.000657112	0.338519	0.46306	-3.28948
K03586	4.96e-06	3.31e-06	4.55e-06	4.26e-06	4.55e-06	4.28e-06	3.34e-06	5.44e-06	3.65e-06	9.37e-06	4.93e-06	0	9.34e-06	6.07e-06	8.15e-06	6.3e-06	4.81e-06	0	0.338441	0.46306	-0.471185
K02080	0	0	0	0	4.55e-06	0	0	5.44e-06	0	4.68e-06	4.93e-06	0	0	0	0	0	4.81e-06	5.92e-06	0.338055	0.462746	-0.16837
K07049	4.96e-06	6.61e-06	9.1e-06	4.26e-06	4.55e-06	8.55e-06	6.67e-06	1.09e-05	7.3e-06	4.68e-06	9.86e-06	1.13e-05	4.67e-06	1.21e-05	4.07e-06	1.26e-05	4.81e-06	1.18e-05	0.336631	0.460926	-0.617399
K19338	4.96e-06	0	0	0	0	0	0	5.44e-06	0	4.68e-06	4.93e-06	5.67e-06	0	0	0	0	0	5.92e-06	0.336593	0.460926	-0.169101
K09974	0.000114065	6.28e-05	6.37e-05	6.39e-05	0.000109233	8.98e-05	7.67e-05	5.98e-05	8.03e-05	6.09e-05	5.42e-05	6.24e-05	8.88e-05	9.11e-05	7.33e-05	8.82e-05	6.25e-05	6.51e-05	0.336553	0.460926	1.07057
K08256	9.92e-06	0	0	0	0	0	1e-05	0	3.65e-06	4.68e-06	0	1.13e-05	0	6.07e-06	0	0	9.62e-06	1.18e-05	0.336327	0.460896	-0.194908
K06145	0	3.31e-06	0	0	0	0	0	0	0	0	0	5.67e-06	0	0	0	0	0	5.92e-06	0.33627	0.460896	-0.104136
K07159	4.96e-06	9.92e-06	9.1e-06	4.26e-06	4.55e-06	8.55e-06	1e-05	1.09e-05	1.46e-05	9.37e-06	4.93e-06	1.13e-05	4.67e-06	6.07e-06	4.07e-06	6.3e-06	4.81e-06	1.18e-05	0.336207	0.460896	0.600074
K18348	2.98e-05	1.65e-05	9.1e-06	1.7e-05	4.55e-06	2.57e-05	2e-05	3.81e-05	1.82e-05	1.87e-05	3.45e-05	3.97e-05	1.4e-05	4.25e-05	1.63e-05	3.15e-05	2.4e-05	5.92e-06	0.335723	0.460455	-0.488906
K13787	2.48e-05	3.31e-05	2.73e-05	3.41e-05	3.19e-05	1.28e-05	3.67e-05	4.35e-05	4.74e-05	3.75e-05	2.96e-05	4.54e-05	4.67e-06	3.64e-05	1.22e-05	3.15e-05	1.44e-05	2.96e-05	0.335674	0.460455	0.614159
K03652	0.000109105	0.000145458	9.56e-05	0.000127776	0.000109233	0.000124045	0.000140119	0.000130548	0.000131349	0.000149845	0.000152834	0.000187193	9.34e-05	0.000133578	0.000114051	0.00013236	9.14e-05	0.000165758	0.335603	0.460455	-1.26331
K16925	9.92e-06	1.98e-05	9.1e-06	8.52e-06	1.37e-05	0	1e-05	5.44e-06	7.3e-06	1.4e-05	9.86e-06	1.13e-05	9.34e-06	6.07e-06	8.15e-06	6.3e-06	1.92e-05	2.37e-05	0.334844	0.459636	-0.462188
K06942	0.00104146	0.00103804	0.00102398	0.00101795	0.00107412	0.00103085	0.00100085	0.000989991	0.00103985	0.00106296	0.00105998	0.00107778	0.00103705	0.00105041	0.000944995	0.00107149	0.00102417	0.00107151	0.334312	0.459035	-7.59679
K02683	4.96e-06	9.92e-06	4.55e-06	4.26e-06	4.55e-06	8.55e-06	6.67e-06	1.09e-05	1.09e-05	4.68e-06	9.86e-06	1.7e-05	4.67e-06	1.21e-05	4.07e-06	1.26e-05	4.81e-06	1.18e-05	0.334076	0.45884	-0.525001
K21379	9.92e-06	1.98e-05	9.1e-06	3.41e-05	2.28e-05	0	3.34e-05	3.26e-05	2.92e-05	2.34e-05	2.96e-05	2.84e-05	9.34e-06	4.25e-05	2.44e-05	3.78e-05	1.92e-05	2.37e-05	0.332727	0.457114	-0.531354
K01070	0	0	4.55e-06	0	0	0	0	0	0	0	0	0	0	0	0	0	0	0	0.332195	0.456512	0.0588235
K01212	0	0	0	4.26e-06	0	0	0	0	0	0	0	0	0	0	0	0	0	0	0.332195	0.456512	0.0588235
K02317	0	3.31e-06	0	0	0	0	0	0	0	0	0	0	0	0	0	0	0	0	0.332195	0.456512	0.0588235
K02479	0	0	0	0	0	4.28e-06	0	0	0	0	0	0	0	0	0	0	0	0	0.332195	0.456512	0.0588235
K02487	0	3.31e-06	0	0	0	0	0	0	0	0	0	0	0	0	0	0	0	0	0.332195	0.456512	0.0588235
K02509	0	0	0	0	9.1e-06	0	0	0	0	0	0	0	0	0	0	0	0	0	0.332195	0.456512	0.0588235
K02560	0	0	4.55e-06	0	0	0	0	0	0	0	0	0	0	0	0	0	0	0	0.332195	0.456512	0.0588235
K02682	0	0	0	4.26e-06	0	0	0	0	0	0	0	0	0	0	0	0	0	0	0.332195	0.456512	0.0588235
K03225	0	0	0	0	0	0	0	5.44e-06	0	0	0	0	0	0	0	0	0	0	0.332195	0.456512	0.0588235
K03291	0	0	4.55e-06	0	0	0	0	0	0	0	0	0	0	0	0	0	0	0	0.332195	0.456512	0.0588235
K03392	0	3.31e-06	0	0	0	0	0	0	0	0	0	0	0	0	0	0	0	0	0.332195	0.456512	0.0588235
K03566	0	0	4.55e-06	0	0	0	0	0	0	0	0	0	0	0	0	0	0	0	0.332195	0.456512	0.0588235
K03747	0	0	0	0	0	0	3.34e-06	0	0	0	0	0	0	0	0	0	0	0	0.332195	0.456512	0.0588235
K03782	0	0	0	4.26e-06	0	0	0	0	0	0	0	0	0	0	0	0	0	0	0.332195	0.456512	0.0588235
K04058	0	3.31e-06	0	0	0	0	0	0	0	0	0	0	0	0	0	0	0	0	0.332195	0.456512	0.0588235
K05714	0	0	0	4.26e-06	0	0	0	0	0	0	0	0	0	0	0	0	0	0	0.332195	0.456512	0.0588235
K05785	0	6.61e-06	0	0	0	0	0	0	0	0	0	0	0	0	0	0	0	0	0.332195	0.456512	0.0588235
K06175	0	0	0	0	0	0	3.34e-06	0	0	0	0	0	0	0	0	0	0	0	0.332195	0.456512	0.0588235
K06866	0	3.31e-06	0	0	0	0	0	0	0	0	0	0	0	0	0	0	0	0	0.332195	0.456512	0.0588235
K06977	0	0	0	4.26e-06	0	0	0	0	0	0	0	0	0	0	0	0	0	0	0.332195	0.456512	0.0588235
K06979	0	0	4.55e-06	0	0	0	0	0	0	0	0	0	0	0	0	0	0	0	0.332195	0.456512	0.0588235
K07062	0	0	0	0	0	0	0	0	3.65e-06	0	0	0	0	0	0	0	0	0	0.332195	0.456512	0.0588235
K07236	0	0	4.55e-06	0	0	0	0	0	0	0	0	0	0	0	0	0	0	0	0.332195	0.456512	0.0588235
K07275	0	3.31e-06	0	0	0	0	0	0	0	0	0	0	0	0	0	0	0	0	0.332195	0.456512	0.0588235
K07639	0	0	4.55e-06	0	0	0	0	0	0	0	0	0	0	0	0	0	0	0	0.332195	0.456512	0.0588235
K07648	0	0	4.55e-06	0	0	0	0	0	0	0	0	0	0	0	0	0	0	0	0.332195	0.456512	0.0588235
K07675	0	3.31e-06	0	0	0	0	0	0	0	0	0	0	0	0	0	0	0	0	0.332195	0.456512	0.0588235
K07687	0	0	0	0	0	0	0	0	3.65e-06	0	0	0	0	0	0	0	0	0	0.332195	0.456512	0.0588235
K08258	0	3.31e-06	0	0	0	0	0	0	0	0	0	0	0	0	0	0	0	0	0.332195	0.456512	0.0588235
K08297	0	3.31e-06	0	0	0	0	0	0	0	0	0	0	0	0	0	0	0	0	0.332195	0.456512	0.0588235
K09065	0	3.31e-06	0	0	0	0	0	0	0	0	0	0	0	0	0	0	0	0	0.332195	0.456512	0.0588235
K09667	0	0	0	4.26e-06	0	0	0	0	0	0	0	0	0	0	0	0	0	0	0.332195	0.456512	0.0588235
K09682	0	0	0	0	0	4.28e-06	0	0	0	0	0	0	0	0	0	0	0	0	0.332195	0.456512	0.0588235
K09771	0	0	0	0	0	0	3.34e-06	0	0	0	0	0	0	0	0	0	0	0	0.332195	0.456512	0.0588235
K10353	0	0	0	0	4.55e-06	0	0	0	0	0	0	0	0	0	0	0	0	0	0.332195	0.456512	0.0588235
K10711	0	0	0	4.26e-06	0	0	0	0	0	0	0	0	0	0	0	0	0	0	0.332195	0.456512	0.0588235
K10973	0	0	0	4.26e-06	0	0	0	0	0	0	0	0	0	0	0	0	0	0	0.332195	0.456512	0.0588235
K11060	0	0	4.55e-06	0	0	0	0	0	0	0	0	0	0	0	0	0	0	0	0.332195	0.456512	0.0588235
K11392	0	0	4.55e-06	0	0	0	0	0	0	0	0	0	0	0	0	0	0	0	0.332195	0.456512	0.0588235
K11748	0	0	0	0	0	0	3.34e-06	0	0	0	0	0	0	0	0	0	0	0	0.332195	0.456512	0.0588235
K12143	0	0	0	0	0	0	3.34e-06	0	0	0	0	0	0	0	0	0	0	0	0.332195	0.456512	0.0588235
K12203	0	3.31e-06	0	0	0	0	0	0	0	0	0	0	0	0	0	0	0	0	0.332195	0.456512	0.0588235
K12204	0	3.31e-06	0	0	0	0	0	0	0	0	0	0	0	0	0	0	0	0	0.332195	0.456512	0.0588235
K12205	0	3.31e-06	0	0	0	0	0	0	0	0	0	0	0	0	0	0	0	0	0.332195	0.456512	0.0588235
K12206	0	3.31e-06	0	0	0	0	0	0	0	0	0	0	0	0	0	0	0	0	0.332195	0.456512	0.0588235
K12213	0	3.31e-06	0	0	0	0	0	0	0	0	0	0	0	0	0	0	0	0	0.332195	0.456512	0.0588235
K12214	0	3.31e-06	0	0	0	0	0	0	0	0	0	0	0	0	0	0	0	0	0.332195	0.456512	0.0588235
K12218	0	3.31e-06	0	0	0	0	0	0	0	0	0	0	0	0	0	0	0	0	0.332195	0.456512	0.0588235
K12255	0	3.31e-06	0	0	0	0	0	0	0	0	0	0	0	0	0	0	0	0	0.332195	0.456512	0.0588235
K12543	0	3.31e-06	0	0	0	0	0	0	0	0	0	0	0	0	0	0	0	0	0.332195	0.456512	0.0588235
K12553	0	0	0	4.26e-06	0	0	0	0	0	0	0	0	0	0	0	0	0	0	0.332195	0.456512	0.0588235
K12943	0	0	0	0	0	0	0	5.44e-06	0	0	0	0	0	0	0	0	0	0	0.332195	0.456512	0.0588235
K12985	0	0	0	0	0	0	0	5.44e-06	0	0	0	0	0	0	0	0	0	0	0.332195	0.456512	0.0588235
K12991	0	0	4.55e-06	0	0	0	0	0	0	0	0	0	0	0	0	0	0	0	0.332195	0.456512	0.0588235
K12999	0	0	0	0	0	0	0	0	3.65e-06	0	0	0	0	0	0	0	0	0	0.332195	0.456512	0.0588235
K13483	0	0	0	0	0	0	3.34e-06	0	0	0	0	0	0	0	0	0	0	0	0.332195	0.456512	0.0588235
K13533	0	0	0	0	9.1e-06	0	0	0	0	0	0	0	0	0	0	0	0	0	0.332195	0.456512	0.0588235
K13636	0	0	0	0	0	0	0	5.44e-06	0	0	0	0	0	0	0	0	0	0	0.332195	0.456512	0.0588235
K13639	0	0	0	0	0	0	0	5.44e-06	0	0	0	0	0	0	0	0	0	0	0.332195	0.456512	0.0588235
K14052	0	0	0	0	0	0	6.67e-06	0	0	0	0	0	0	0	0	0	0	0	0.332195	0.456512	0.0588235
K14414	0	3.31e-06	0	0	0	0	0	0	0	0	0	0	0	0	0	0	0	0	0.332195	0.456512	0.0588235
K14459	0	0	4.55e-06	0	0	0	0	0	0	0	0	0	0	0	0	0	0	0	0.332195	0.456512	0.0588235
K14651	0	0	0	0	0	0	0	0	3.65e-06	0	0	0	0	0	0	0	0	0	0.332195	0.456512	0.0588235
K15125	0	0	0	0	0	4.28e-06	0	0	0	0	0	0	0	0	0	0	0	0	0.332195	0.456512	0.0588235
K15545	0	0	0	0	4.55e-06	0	0	0	0	0	0	0	0	0	0	0	0	0	0.332195	0.456512	0.0588235
K15773	0	3.31e-06	0	0	0	0	0	0	0	0	0	0	0	0	0	0	0	0	0.332195	0.456512	0.0588235
K16122	0	0	4.55e-06	0	0	0	0	0	0	0	0	0	0	0	0	0	0	0	0.332195	0.456512	0.0588235
K16201	0	0	0	0	0	0	0	5.44e-06	0	0	0	0	0	0	0	0	0	0	0.332195	0.456512	0.0588235
K16291	0	3.31e-06	0	0	0	0	0	0	0	0	0	0	0	0	0	0	0	0	0.332195	0.456512	0.0588235
K16695	0	0	4.55e-06	0	0	0	0	0	0	0	0	0	0	0	0	0	0	0	0.332195	0.456512	0.0588235
K18123	0	0	0	0	4.55e-06	0	0	0	0	0	0	0	0	0	0	0	0	0	0.332195	0.456512	0.0588235
K18221	0	0	0	0	0	0	0	5.44e-06	0	0	0	0	0	0	0	0	0	0	0.332195	0.456512	0.0588235
K18830	0	0	0	0	0	0	0	0	3.65e-06	0	0	0	0	0	0	0	0	0	0.332195	0.456512	0.0588235
K18837	0	3.31e-06	0	0	0	0	0	0	0	0	0	0	0	0	0	0	0	0	0.332195	0.456512	0.0588235
K18838	0	3.31e-06	0	0	0	0	0	0	0	0	0	0	0	0	0	0	0	0	0.332195	0.456512	0.0588235
K18901	0	0	9.1e-06	0	0	0	0	0	0	0	0	0	0	0	0	0	0	0	0.332195	0.456512	0.0588235
K18986	0	0	0	4.26e-06	0	0	0	0	0	0	0	0	0	0	0	0	0	0	0.332195	0.456512	0.0588235
K18997	0	3.31e-06	0	0	0	0	0	0	0	0	0	0	0	0	0	0	0	0	0.332195	0.456512	0.0588235
K19228	0	0	0	0	0	0	0	5.44e-06	0	0	0	0	0	0	0	0	0	0	0.332195	0.456512	0.0588235
K19778	0	0	0	0	0	0	0	5.44e-06	0	0	0	0	0	0	0	0	0	0	0.332195	0.456512	0.0588235
K20112	0	3.31e-06	0	0	0	0	0	0	0	0	0	0	0	0	0	0	0	0	0.332195	0.456512	0.0588235
K20342	0	0	4.55e-06	0	0	0	0	0	0	0	0	0	0	0	0	0	0	0	0.332195	0.456512	0.0588235
K21298	0	3.31e-06	0	0	0	0	0	0	0	0	0	0	0	0	0	0	0	0	0.332195	0.456512	0.0588235
K21493	0	0	0	4.26e-06	0	0	0	0	0	0	0	0	0	0	0	0	0	0	0.332195	0.456512	0.0588235
K21908	0	0	0	0	0	0	3.34e-06	0	0	0	0	0	0	0	0	0	0	0	0.332195	0.456512	0.0588235
K22104	0	0	0	0	0	4.28e-06	0	0	0	0	0	0	0	0	0	0	0	0	0.332195	0.456512	0.0588235
K22252	0	0	4.55e-06	0	0	0	0	0	0	0	0	0	0	0	0	0	0	0	0.332195	0.456512	0.0588235
K22457	0	0	0	0	4.55e-06	0	0	0	0	0	0	0	0	0	0	0	0	0	0.332195	0.456512	0.0588235
K00090	0	0	0	0	0	0	0	0	0	0	0	5.67e-06	0	0	0	0	0	0	0.332195	0.456512	-0.0588235
K00158	0	0	0	0	0	0	0	0	0	0	0	0	0	0	0	0	0	5.92e-06	0.332195	0.456512	-0.0588235
K01261	0	0	0	0	0	0	0	0	0	0	0	0	4.67e-06	0	0	0	0	0	0.332195	0.456512	-0.0588235
K01467	0	0	0	0	0	0	0	0	0	0	0	0	0	0	0	0	4.81e-06	0	0.332195	0.456512	-0.0588235
K01782	0	0	0	0	0	0	0	0	0	4.68e-06	0	0	0	0	0	0	0	0	0.332195	0.456512	-0.0588235
K02248	0	0	0	0	0	0	0	0	0	0	0	0	0	6.07e-06	0	0	0	0	0.332195	0.456512	-0.0588235
K02364	0	0	0	0	0	0	0	0	0	0	0	0	0	0	0	0	4.81e-06	0	0.332195	0.456512	-0.0588235
K03485	0	0	0	0	0	0	0	0	0	0	0	0	0	6.07e-06	0	0	0	0	0.332195	0.456512	-0.0588235
K03756	0	0	0	0	0	0	0	0	0	0	0	0	4.67e-06	0	0	0	0	0	0.332195	0.456512	-0.0588235
K04086	0	0	0	0	0	0	0	0	0	0	0	0	0	0	0	0	0	5.92e-06	0.332195	0.456512	-0.0588235
K05351	0	0	0	0	0	0	0	0	0	0	0	0	0	0	0	0	0	5.92e-06	0.332195	0.456512	-0.0588235
K05577	0	0	0	0	0	0	0	0	0	0	0	0	0	6.07e-06	0	0	0	0	0.332195	0.456512	-0.0588235
K05586	0	0	0	0	0	0	0	0	0	0	0	0	0	0	0	0	0	5.92e-06	0.332195	0.456512	-0.0588235
K06222	0	0	0	0	0	0	0	0	0	0	0	0	0	0	4.07e-06	0	0	0	0.332195	0.456512	-0.0588235
K07063	0	0	0	0	0	0	0	0	0	0	0	0	0	6.07e-06	0	0	0	0	0.332195	0.456512	-0.0588235
K07180	0	0	0	0	0	0	0	0	0	0	0	0	0	6.07e-06	0	0	0	0	0.332195	0.456512	-0.0588235
K07592	0	0	0	0	0	0	0	0	0	0	0	0	0	0	0	0	4.81e-06	0	0.332195	0.456512	-0.0588235
K07778	0	0	0	0	0	0	0	0	0	4.68e-06	0	0	0	0	0	0	0	0	0.332195	0.456512	-0.0588235
K08166	0	0	0	0	0	0	0	0	0	0	0	0	0	0	0	0	4.81e-06	0	0.332195	0.456512	-0.0588235
K08306	0	0	0	0	0	0	0	0	0	4.68e-06	0	0	0	0	0	0	0	0	0.332195	0.456512	-0.0588235
K08357	0	0	0	0	0	0	0	0	0	0	0	0	0	0	0	0	4.81e-06	0	0.332195	0.456512	-0.0588235
K08693	0	0	0	0	0	0	0	0	0	0	0	0	0	0	0	6.3e-06	0	0	0.332195	0.456512	-0.0588235
K10126	0	0	0	0	0	0	0	0	0	0	0	0	4.67e-06	0	0	0	0	0	0.332195	0.456512	-0.0588235
K10242	0	0	0	0	0	0	0	0	0	0	9.86e-06	0	0	0	0	0	0	0	0.332195	0.456512	-0.0588235
K11604	0	0	0	0	0	0	0	0	0	0	0	0	4.67e-06	0	0	0	0	0	0.332195	0.456512	-0.0588235
K11897	0	0	0	0	0	0	0	0	0	0	0	0	0	0	0	0	0	5.92e-06	0.332195	0.456512	-0.0588235
K11933	0	0	0	0	0	0	0	0	0	0	0	0	0	6.07e-06	0	0	0	0	0.332195	0.456512	-0.0588235
K11935	0	0	0	0	0	0	0	0	0	0	0	0	4.67e-06	0	0	0	0	0	0.332195	0.456512	-0.0588235
K12138	0	0	0	0	0	0	0	0	0	0	4.93e-06	0	0	0	0	0	0	0	0.332195	0.456512	-0.0588235
K12295	0	0	0	0	0	0	0	0	0	0	0	5.67e-06	0	0	0	0	0	0	0.332195	0.456512	-0.0588235
K12567	0	0	0	0	0	0	0	0	0	0	0	0	0	0	4.07e-06	0	0	0	0.332195	0.456512	-0.0588235
K13256	0	0	0	0	0	0	0	0	0	0	0	0	0	0	0	0	0	5.92e-06	0.332195	0.456512	-0.0588235
K13274	0	0	0	0	0	0	0	0	0	0	0	0	0	0	4.07e-06	0	0	0	0.332195	0.456512	-0.0588235
K13638	0	0	0	0	0	0	0	0	0	0	0	0	0	0	8.15e-06	0	0	0	0.332195	0.456512	-0.0588235
K13796	0	0	0	0	0	0	0	0	0	0	0	0	0	0	0	0	0	5.92e-06	0.332195	0.456512	-0.0588235
K13923	0	0	0	0	0	0	0	0	0	0	0	0	0	0	0	6.3e-06	0	0	0.332195	0.456512	-0.0588235
K15721	0	0	0	0	0	0	0	0	0	4.68e-06	0	0	0	0	0	0	0	0	0.332195	0.456512	-0.0588235
K15834	0	0	0	0	0	0	0	0	0	0	4.93e-06	0	0	0	0	0	0	0	0.332195	0.456512	-0.0588235
K15835	0	0	0	0	0	0	0	0	0	0	4.93e-06	0	0	0	0	0	0	0	0.332195	0.456512	-0.0588235
K16188	0	0	0	0	0	0	0	0	0	0	0	5.67e-06	0	0	0	0	0	0	0.332195	0.456512	-0.0588235
K16321	0	0	0	0	0	0	0	0	0	0	0	0	0	0	0	0	0	5.92e-06	0.332195	0.456512	-0.0588235
K16916	0	0	0	0	0	0	0	0	0	0	0	0	0	0	4.07e-06	0	0	0	0.332195	0.456512	-0.0588235
K17331	0	0	0	0	0	0	0	0	0	0	4.93e-06	0	0	0	0	0	0	0	0.332195	0.456512	-0.0588235
K18140	0	0	0	0	0	0	0	0	0	0	0	0	4.67e-06	0	0	0	0	0	0.332195	0.456512	-0.0588235
K18141	0	0	0	0	0	0	0	0	0	0	0	0	0	0	0	0	0	5.92e-06	0.332195	0.456512	-0.0588235
K18148	0	0	0	0	0	0	0	0	0	0	0	0	0	0	0	6.3e-06	0	0	0.332195	0.456512	-0.0588235
K18673	0	0	0	0	0	0	0	0	0	0	0	0	0	0	4.07e-06	0	0	0	0.332195	0.456512	-0.0588235
K19064	0	0	0	0	0	0	0	0	0	0	0	0	0	0	0	0	0	5.92e-06	0.332195	0.456512	-0.0588235
K19505	0	0	0	0	0	0	0	0	0	0	0	0	0	0	4.07e-06	0	0	0	0.332195	0.456512	-0.0588235
K19577	0	0	0	0	0	0	0	0	0	0	0	0	0	6.07e-06	0	0	0	0	0.332195	0.456512	-0.0588235
K19974	0	0	0	0	0	0	0	0	0	4.68e-06	0	0	0	0	0	0	0	0	0.332195	0.456512	-0.0588235
K20374	0	0	0	0	0	0	0	0	0	0	0	0	0	0	0	0	0	5.92e-06	0.332195	0.456512	-0.0588235
K20971	0	0	0	0	0	0	0	0	0	0	0	5.67e-06	0	0	0	0	0	0	0.332195	0.456512	-0.0588235
K21833	0	0	0	0	0	0	0	0	0	4.68e-06	0	0	0	0	0	0	0	0	0.332195	0.456512	-0.0588235
K22409	0	0	0	0	0	0	0	0	0	0	4.93e-06	0	0	0	0	0	0	0	0.332195	0.456512	-0.0588235
K01134	4.96e-06	0	0	0	0	0	0	0	0	0	0	0	0	0	0	0	0	0	0.332195	0.456512	0.0588235
K01699	9.92e-06	0	0	0	0	0	0	0	0	0	0	0	0	0	0	0	0	0	0.332195	0.456512	0.0588235
K03829	4.96e-06	0	0	0	0	0	0	0	0	0	0	0	0	0	0	0	0	0	0.332195	0.456512	0.0588235
K04748	4.96e-06	0	0	0	0	0	0	0	0	0	0	0	0	0	0	0	0	0	0.332195	0.456512	0.0588235
K05579	9.92e-06	0	0	0	0	0	0	0	0	0	0	0	0	0	0	0	0	0	0.332195	0.456512	0.0588235
K07274	4.96e-06	0	0	0	0	0	0	0	0	0	0	0	0	0	0	0	0	0	0.332195	0.456512	0.0588235
K07757	4.96e-06	0	0	0	0	0	0	0	0	0	0	0	0	0	0	0	0	0	0.332195	0.456512	0.0588235
K15736	4.96e-06	0	0	0	0	0	0	0	0	0	0	0	0	0	0	0	0	0	0.332195	0.456512	0.0588235
K18144	4.96e-06	0	0	0	0	0	0	0	0	0	0	0	0	0	0	0	0	0	0.332195	0.456512	0.0588235
K18530	4.96e-06	0	0	0	0	0	0	0	0	0	0	0	0	0	0	0	0	0	0.332195	0.456512	0.0588235
K07463	9.92e-06	2.31e-05	1.82e-05	8.52e-06	9.1e-06	1.28e-05	2e-05	2.18e-05	2.19e-05	9.37e-06	1.97e-05	3.4e-05	9.34e-06	2.43e-05	8.15e-06	3.15e-05	9.62e-06	4.14e-05	0.33112	0.456512	-0.467563
K02869	4.96e-06	1.32e-05	4.55e-06	4.26e-06	4.55e-06	8.55e-06	1.33e-05	1.09e-05	1.09e-05	4.68e-06	4.93e-06	1.7e-05	4.67e-06	6.07e-06	4.07e-06	6.3e-06	4.81e-06	5.92e-06	0.330653	0.456512	0.473012
K11901	4.96e-06	3.31e-06	1.37e-05	0	0	4.28e-06	6.67e-06	0	3.65e-06	0	0	0	4.67e-06	0	4.07e-06	6.3e-06	0	5.92e-06	0.330544	0.456512	0.218232
K01548	1.49e-05	1.98e-05	3.64e-05	1.7e-05	9.1e-06	1.28e-05	1e-05	3.26e-05	0	4.68e-06	0	5.67e-06	1.4e-05	1.82e-05	2.44e-05	3.15e-05	0	5.92e-06	0.329448	0.456512	0.316884
K17489	4.96e-06	9.92e-06	4.55e-06	4.26e-06	9.1e-06	0	0	1.63e-05	7.3e-06	1.4e-05	0	0	4.67e-06	6.07e-06	0	0	9.62e-06	0	0.329436	0.456512	0.245013
K02982	0.00113073	0.00115375	0.00109224	0.00112869	0.00107868	0.0011549	0.00110427	0.00101175	0.00112742	0.00114257	0.00109942	0.00110614	0.00113048	0.00102612	0.000989801	0.00102106	0.00108187	0.00116031	0.329365	0.456512	5.22812
K08975	4.96e-06	6.61e-06	4.55e-06	4.26e-06	4.55e-06	4.28e-06	6.67e-06	1.09e-05	7.3e-06	4.68e-06	4.93e-06	5.67e-06	4.67e-06	6.07e-06	4.07e-06	6.3e-06	4.81e-06	5.92e-06	0.329354	0.456512	0.865108
K10122	1.49e-05	6.61e-06	0	2.98e-05	3.64e-05	2.57e-05	2.34e-05	2.72e-05	2.19e-05	1.4e-05	0	2.84e-05	1.87e-05	1.21e-05	2.85e-05	1.89e-05	1.44e-05	5.92e-06	0.32835	0.456512	0.433963
K18009	1.49e-05	3.31e-06	1.37e-05	4.26e-06	4.55e-06	0	3e-05	1.09e-05	1.46e-05	0	1.97e-05	5.67e-06	9.34e-06	6.07e-06	4.07e-06	6.3e-06	0	1.18e-05	0.326984	0.456512	0.287364
K06965	4.96e-06	9.92e-06	4.55e-06	4.26e-06	4.55e-06	4.28e-06	1.33e-05	1.09e-05	1.09e-05	4.68e-06	9.86e-06	1.7e-05	4.67e-06	1.21e-05	4.07e-06	1.26e-05	4.81e-06	1.78e-05	0.32687	0.456512	-0.467051
K09681	1.98e-05	2.31e-05	3.19e-05	8.52e-06	1.82e-05	2.14e-05	1.33e-05	0	1.82e-05	4.21e-05	4.93e-05	5.11e-05	1.4e-05	0	1.22e-05	6.3e-06	1.44e-05	2.96e-05	0.326407	0.456512	-0.348119
K00943	0.000947233	0.00106449	0.000973914	0.000911468	0.000937582	0.000915363	0.000940797	0.000745213	0.0010362	0.00103487	0.000971238	0.00100971	0.000962311	0.00108684	0.000765772	0.00108409	0.000928001	0.00103599	0.326154	0.456512	-2.57202
K03462	3.47e-05	5.62e-05	5.46e-05	5.54e-05	7.28e-05	6.84e-05	7.01e-05	1.09e-05	5.47e-05	4.68e-05	3.94e-05	5.11e-05	5.14e-05	4.25e-05	4.48e-05	4.41e-05	4.33e-05	5.33e-05	0.325623	0.456512	0.884163
K14977	0	3.31e-06	0	4.26e-06	4.55e-06	4.28e-06	3.34e-06	0	1.09e-05	0	0	0	4.67e-06	6.07e-06	0	6.3e-06	0	0	0.325612	0.456512	0.211743
K18882	4.96e-06	9.92e-06	4.55e-06	4.26e-06	4.55e-06	8.55e-06	1e-05	1.09e-05	7.3e-06	4.68e-06	9.86e-06	1.13e-05	4.67e-06	1.82e-05	4.07e-06	1.26e-05	4.81e-06	1.18e-05	0.324969	0.456512	-0.523529
K19647	0	6.61e-06	4.55e-06	8.52e-06	4.55e-06	8.55e-06	1e-05	1.09e-05	1.09e-05	4.68e-06	4.93e-06	0	9.34e-06	6.07e-06	1.22e-05	6.3e-06	4.81e-06	0	0.324796	0.456512	0.421027
K09607	1.98e-05	1.98e-05	1.37e-05	2.13e-05	2.28e-05	1.71e-05	1.67e-05	3.81e-05	2.19e-05	1.4e-05	2.47e-05	2.27e-05	2.34e-05	4.25e-05	2.44e-05	3.78e-05	1.92e-05	1.78e-05	0.324196	0.456512	-0.718729
K19115	1.49e-05	3.31e-06	4.55e-06	1.28e-05	1.82e-05	1.71e-05	6.67e-06	0	3.65e-06	4.68e-06	0	0	1.4e-05	1.21e-05	8.15e-06	6.3e-06	9.62e-06	0	0.324131	0.456512	0.313886
K07226	4.96e-06	0	0	4.26e-06	4.55e-06	4.28e-06	0	0	3.65e-06	9.37e-06	0	0	4.67e-06	6.07e-06	0	1.26e-05	4.81e-06	0	0.323863	0.456512	-0.227675
K03638	0	3.31e-06	0	0	0	0	6.67e-06	0	0	0	4.93e-06	5.67e-06	4.67e-06	0	0	0	0	5.92e-06	0.323848	0.456512	-0.169126
K02913	0.000624876	0.000545467	0.000582528	0.000574992	0.000587127	0.000534675	0.000603845	0.000505875	0.000561884	0.000590015	0.00069515	0.000595613	0.000635312	0.000643602	0.000431765	0.000693315	0.000490446	0.000639352	0.322942	0.456512	-2.19286
K19124	2.48e-05	3.31e-05	1.82e-05	2.98e-05	4.55e-05	3.42e-05	2.34e-05	2.72e-05	2.92e-05	3.28e-05	3.94e-05	3.97e-05	4.67e-06	3.64e-05	2.44e-05	4.41e-05	4.33e-05	4.74e-05	0.322869	0.456512	-0.754084
K07152	4.96e-06	0	0	4.26e-06	4.55e-06	0	3.34e-06	0	3.65e-06	4.68e-06	4.93e-06	0	4.67e-06	6.07e-06	0	6.3e-06	4.81e-06	0	0.322769	0.456512	-0.298133
K08851	4.96e-06	9.92e-06	1.37e-05	1.28e-05	4.55e-06	8.55e-06	6.67e-06	2.18e-05	7.3e-06	4.68e-06	1.48e-05	2.27e-05	4.67e-06	2.43e-05	4.07e-06	2.52e-05	4.81e-06	1.78e-05	0.322035	0.456512	-0.398634
K03743	0.000317397	0.000317363	0.000332223	0.000332217	0.000355007	0.000350747	0.000313599	0.000320931	0.000353914	0.000304373	0.00035497	0.000357368	0.00036437	0.000327873	0.000346227	0.000302538	0.000341389	0.000402555	0.321318	0.456512	-3.45915
K07346	0	0	0	0	0	0	3.34e-06	5.44e-06	1.09e-05	0	0	0	0	0	0	6.3e-06	0	0	0.321138	0.456512	0.119392
K13531	4.96e-06	3.31e-06	0	0	0	0	3.34e-06	0	0	0	0	5.67e-06	4.67e-06	0	4.07e-06	0	9.62e-06	0	0.320851	0.456512	-0.176647
K07122	0	0	4.55e-06	0	0	0	0	5.44e-06	0	0	0	0	4.67e-06	6.07e-06	4.07e-06	6.3e-06	0	0	0.320572	0.456512	-0.172358
K09722	4.96e-06	9.92e-06	4.55e-06	4.26e-06	4.55e-06	8.55e-06	1e-05	1.09e-05	7.3e-06	4.68e-06	9.86e-06	1.7e-05	4.67e-06	1.21e-05	4.07e-06	1.26e-05	4.81e-06	1.18e-05	0.320316	0.456512	-0.544737
K06925	0.0011952	0.0012397	0.00124697	0.00123943	0.00124252	0.001249	0.00117766	0.00108246	0.00116025	0.00127368	0.00126705	0.00122526	0.00121924	0.00123256	0.00119754	0.00124797	0.00114437	0.00123726	0.317688	0.456512	-6.44201
K01364	9.92e-06	0	4.55e-06	0	0	8.55e-06	0	0	0	4.68e-06	1.48e-05	5.67e-06	4.67e-06	6.07e-06	0	6.3e-06	0	0	0.317631	0.456512	-0.212118
K18237	9.92e-06	9.92e-06	4.55e-06	8.52e-06	4.55e-06	8.55e-06	6.67e-06	1.63e-05	1.09e-05	4.68e-06	1.97e-05	1.13e-05	4.67e-06	3.04e-05	4.07e-06	1.26e-05	4.81e-06	1.78e-05	0.317114	0.456512	-0.393592
K01586	0.000704225	0.000800019	0.000741813	0.000787952	0.000732771	0.000778486	0.000817359	0.000886641	0.00080634	0.000763273	0.00070008	0.000714735	0.000770783	0.000801467	0.000818724	0.000750041	0.000812602	0.000704471	0.316917	0.456512	3.95904
K16554	4.96e-06	1.98e-05	1.82e-05	1.28e-05	1.82e-05	4.28e-06	1.67e-05	1.09e-05	1.82e-05	1.87e-05	1.48e-05	1.7e-05	9.34e-06	2.43e-05	8.15e-06	1.89e-05	1.92e-05	1.78e-05	0.316669	0.456512	-0.705629
K15667	4.96e-06	0	4.55e-06	4.26e-06	0	4.28e-06	3.34e-06	0	0	9.37e-06	0	0	0	0	0	0	0	0	0.316533	0.456512	0.160279
K07173	0.000674469	0.000647949	0.000618936	0.000643139	0.000678154	0.000680106	0.000680576	0.000658181	0.000685936	0.000660255	0.000655709	0.000646665	0.000738083	0.000649674	0.000769845	0.000623984	0.00078856	0.000639352	0.316337	0.456512	-3.71757
K00333	5.95e-05	5.62e-05	5.46e-05	4.26e-05	4.1e-05	6.42e-05	7.67e-05	3.26e-05	5.11e-05	2.81e-05	3.94e-05	3.4e-05	4.67e-05	7.89e-05	3.26e-05	8.19e-05	1.44e-05	4.14e-05	0.316254	0.456512	0.677194
K02457	0	0	4.55e-06	0	0	0	0	5.44e-06	0	4.68e-06	0	5.67e-06	0	0	0	0	4.81e-06	5.92e-06	0.31609	0.456512	-0.175782
K22224	8.93e-05	6.61e-05	5.46e-05	5.54e-05	7.28e-05	3.85e-05	7.34e-05	6.53e-05	7.66e-05	3.28e-05	6.9e-05	3.97e-05	3.27e-05	9.71e-05	1.22e-05	9.45e-05	1.92e-05	8.29e-05	0.315715	0.456512	0.602034
K03574	0.00140349	0.00137193	0.00140626	0.00141831	0.00129714	0.00145859	0.00146124	0.00126741	0.0014339	0.00145631	0.0014396	0.00141245	0.00141077	0.00145114	0.00137676	0.00140554	0.00137036	0.0014267	0.315043	0.456512	-6.88111
K06909	0.00014878	0.000195046	0.00018204	0.000166109	0.000177503	0.000192483	0.000220186	0.000195822	0.000189727	0.000201354	0.000207066	0.000215555	0.000182185	0.000255012	0.000146637	0.000258417	0.000125016	0.000230877	0.314861	0.456512	-1.42491
K00184	0	1.98e-05	1.37e-05	8.52e-06	4.55e-06	1.28e-05	1.33e-05	2.18e-05	7.3e-06	2.81e-05	1.97e-05	5.67e-06	9.34e-06	1.21e-05	8.15e-06	1.89e-05	1.92e-05	1.18e-05	0.314605	0.456512	-0.475002
K03688	2.48e-05	4.63e-05	3.64e-05	2.56e-05	4.55e-05	2.57e-05	3.67e-05	1.63e-05	2.55e-05	3.28e-05	0	2.84e-05	1.4e-05	3.04e-05	2.04e-05	1.89e-05	2.88e-05	5.33e-05	0.314565	0.456512	0.576737
K00275	4.96e-06	6.61e-06	3.64e-05	4.26e-06	0	1.28e-05	1e-05	1.63e-05	3.65e-06	4.68e-06	4.93e-06	5.67e-06	0	1.21e-05	8.15e-06	1.26e-05	4.81e-06	5.92e-06	0.314431	0.456512	0.269009
K03044	9.92e-06	3.31e-06	0	0	4.55e-06	0	6.67e-06	5.44e-06	3.65e-06	4.68e-06	0	2.27e-05	0	0	0	1.89e-05	4.81e-06	1.18e-05	0.314414	0.456512	-0.207529
K03299	5.46e-05	5.95e-05	4.55e-05	5.11e-05	5.46e-05	6.42e-05	6.67e-05	8.7e-05	4.74e-05	5.15e-05	3.94e-05	5.11e-05	6.07e-05	4.86e-05	6.11e-05	5.67e-05	6.25e-05	5.33e-05	0.314387	0.456512	1.40373
K13481	4.96e-06	0	4.55e-06	4.26e-06	4.55e-06	0	0	0	0	4.68e-06	0	1.13e-05	0	6.07e-06	0	0	4.81e-06	5.92e-06	0.314147	0.456512	-0.223456
K07799	1.98e-05	1.32e-05	1.37e-05	8.52e-06	4.55e-06	4.28e-06	6.67e-06	2.18e-05	1.46e-05	0	4.93e-06	0	1.87e-05	1.82e-05	1.22e-05	1.26e-05	9.62e-06	0	0.313715	0.456512	0.376253
K17675	1.49e-05	1.98e-05	9.1e-06	3.41e-05	4.1e-05	2.57e-05	2.67e-05	1.63e-05	2.92e-05	3.28e-05	2.47e-05	1.7e-05	1.87e-05	1.21e-05	2.44e-05	1.26e-05	1.92e-05	1.78e-05	0.312335	0.454889	0.672756
K21948	0	3.31e-06	4.55e-06	8.52e-06	0	8.55e-06	1e-05	0	1.09e-05	0	4.93e-06	0	9.34e-06	0	8.15e-06	0	4.81e-06	0	0.311466	0.453757	0.25105
K00939	0.00124975	0.00124631	0.00125608	0.00132887	0.00122432	0.00125328	0.00122103	0.00115318	0.00128431	0.00130646	0.00133114	0.00123661	0.00128931	0.00125077	0.0011568	0.00125427	0.00126939	0.00136158	0.311202	0.453509	-6.06435
K16190	0	1.32e-05	4.55e-06	4.26e-06	4.55e-06	4.28e-06	1.33e-05	5.44e-06	1.46e-05	4.68e-06	4.93e-06	5.67e-06	0	1.21e-05	0	6.3e-06	4.81e-06	5.92e-06	0.311137	0.453509	0.351518
K06189	1.49e-05	6.61e-06	9.1e-06	4.26e-06	4.55e-06	8.55e-06	6.67e-06	1.63e-05	3.65e-06	4.68e-06	4.93e-06	0	9.34e-06	6.07e-06	8.15e-06	1.26e-05	4.81e-06	5.92e-06	0.310113	0.452191	0.465664
K03969	6.94e-05	5.62e-05	5.92e-05	5.54e-05	0.000109233	0.000141154	8.01e-05	7.07e-05	9.12e-05	3.28e-05	6.41e-05	7.94e-05	6.54e-05	7.89e-05	8.96e-05	9.45e-05	4.81e-05	7.1e-05	0.310099	0.452191	0.80126
K20989	0	0	0	0	4.55e-06	0	3.34e-06	0	3.65e-06	0	0	0	0	0	4.07e-06	0	0	0	0.309937	0.452191	0.134379
K09716	4.96e-06	6.61e-06	4.55e-06	4.26e-06	4.55e-06	8.55e-06	1e-05	1.09e-05	7.3e-06	4.68e-06	9.86e-06	1.13e-05	4.67e-06	1.21e-05	4.07e-06	1.26e-05	4.81e-06	1.18e-05	0.309815	0.45216	-0.622858
K02455	1.98e-05	2.98e-05	3.19e-05	2.13e-05	3.64e-05	2.57e-05	2.67e-05	2.72e-05	4.01e-05	2.34e-05	1.48e-05	5.67e-06	1.87e-05	4.86e-05	8.15e-06	3.78e-05	2.4e-05	2.96e-05	0.309631	0.452026	0.627565
K16306	9.92e-06	1.65e-05	1.37e-05	8.52e-06	9.1e-06	1.28e-05	1.33e-05	2.18e-05	1.46e-05	9.37e-06	1.97e-05	2.27e-05	9.34e-06	2.43e-05	8.15e-06	2.52e-05	9.62e-06	1.78e-05	0.30907	0.451341	-0.662751
K02529	0.00155227	0.0017488	0.00192052	0.0016909	0.00140182	0.00135166	0.00205507	0.0015829	0.00198848	0.0017279	0.00165653	0.00212152	0.00159762	0.00190652	0.00181667	0.00195389	0.00180792	0.00165758	0.308798	0.45108	-2.13624
K16149	0.000133902	6.28e-05	0.000109224	6.81e-05	0.000113784	0.000124045	9.34e-05	4.9e-05	0.000102161	8.9e-05	9.86e-05	9.08e-05	7.47e-05	9.71e-05	4.48e-05	8.82e-05	5.29e-05	0.000106559	0.308465	0.450727	0.909273
K06436	0.000123983	0.000142152	0.000122877	0.000114998	0.000150195	0.000132599	7.01e-05	5.44e-05	0.000102161	0.000135797	0.000128184	0.000170175	0.000135471	0.000163936	7.33e-05	0.000144966	5.77e-05	0.000165758	0.308115	0.45035	-0.876133
K06990	9.42e-05	5.95e-05	5.01e-05	2.98e-05	2.73e-05	5.13e-05	6.67e-05	2.18e-05	6.57e-05	2.81e-05	2.96e-05	4.54e-05	2.34e-05	9.11e-05	8.15e-06	5.67e-05	1.44e-05	5.92e-05	0.307481	0.449558	0.484003
K12529	0	6.61e-06	4.55e-06	0	4.55e-06	0	3.34e-06	0	1.09e-05	4.68e-06	0	0	0	0	0	0	4.81e-06	5.92e-06	0.307452	0.449558	0.202614
K01706	2.48e-05	3.64e-05	1.82e-05	4.26e-06	3.19e-05	1.71e-05	2e-05	4.9e-05	2.19e-05	9.37e-06	1.97e-05	3.4e-05	3.27e-05	4.25e-05	3.67e-05	4.41e-05	1.92e-05	4.14e-05	0.30743	0.449558	-0.582539
K01810	0.00100179	0.000988453	0.000978465	0.00100517	0.000992199	0.000979524	0.000930788	0.000924717	0.000868366	0.00101145	0.000951517	0.000981343	0.000980997	0.000935045	0.000985727	0.000951733	0.00108187	0.000988628	0.307284	0.449558	-5.73217
K06156	9.92e-06	6.61e-06	1.37e-05	1.28e-05	9.1e-06	8.55e-06	6.67e-06	1.63e-05	0	4.68e-06	0	5.67e-06	1.4e-05	6.07e-06	2.04e-05	6.3e-06	0	0	0.307246	0.449558	0.344898
K18231	4.96e-06	0	4.55e-06	1.28e-05	4.55e-06	4.28e-06	3.34e-06	5.44e-06	7.3e-06	0	4.93e-06	5.67e-06	0	1.82e-05	4.07e-06	2.52e-05	0	2.37e-05	0.3069	0.449379	-0.243012
K17073	0.00014878	0.000128929	0.000218448	0.000225737	0.000186606	0.000141154	0.000180153	0.000201262	0.000175133	0.000191989	0.000202136	0.000209883	0.000177514	0.00017608	0.00017515	0.00017648	0.00019714	0.000219037	0.306662	0.449165	-1.8209
K18931	1.49e-05	1.32e-05	9.1e-06	8.52e-06	9.1e-06	1.28e-05	1e-05	1.63e-05	1.09e-05	9.37e-06	1.97e-05	1.13e-05	4.67e-06	2.43e-05	8.15e-06	2.52e-05	9.62e-06	1.78e-05	0.305707	0.447901	-0.607546
K10038	0	0	4.55e-06	0	0	0	3.34e-06	0	0	0	4.93e-06	0	0	0	0	6.3e-06	9.62e-06	0	0.305416	0.447608	-0.145203
K07221	4.96e-05	5.62e-05	4.55e-05	5.11e-05	5.01e-05	2.57e-05	4.67e-05	5.98e-05	3.65e-05	3.75e-05	3.94e-05	3.4e-05	4.2e-05	4.86e-05	5.7e-05	4.41e-05	4.33e-05	3.55e-05	0.305084	0.447256	1.32217
K02688	2.48e-05	1.98e-05	9.1e-06	4.26e-06	2.73e-05	1.71e-05	1e-05	2.72e-05	1.82e-05	4.68e-06	9.86e-06	1.13e-05	1.87e-05	1.21e-05	2.85e-05	1.26e-05	1.44e-05	1.18e-05	0.304969	0.447221	0.546365
K09726	4.96e-06	1.32e-05	4.55e-06	4.26e-06	4.55e-06	8.55e-06	2e-05	1.63e-05	1.09e-05	9.37e-06	1.48e-05	2.84e-05	4.67e-06	1.21e-05	4.07e-06	1.89e-05	4.81e-06	2.37e-05	0.304246	0.446294	-0.408022
K04749	0.000114065	0.000112399	9.56e-05	8.94e-05	8.65e-05	6.84e-05	0.000110093	8.7e-05	9.85e-05	8.43e-05	5.92e-05	7.94e-05	9.34e-05	0.000133578	7.74e-05	0.000119754	5.77e-05	5.92e-05	0.304238	0.446294	1.09117
K16784	1.49e-05	1.65e-05	2.28e-05	1.28e-05	1.37e-05	8.55e-06	2.67e-05	1.63e-05	2.92e-05	2.34e-05	1.97e-05	2.84e-05	4.67e-06	2.43e-05	1.22e-05	3.15e-05	1.92e-05	3.55e-05	0.304058	0.446286	-0.633922
K12053	0	3.31e-06	4.55e-06	0	0	0	3.34e-06	0	3.65e-06	0	0	0	0	0	0	0	0	5.92e-06	0.303769	0.445996	0.153298
K12370	4.96e-06	0	4.55e-06	0	0	0	0	0	0	4.68e-06	4.93e-06	0	0	6.07e-06	0	0	4.81e-06	0	0.303455	0.445668	-0.180309
K03057	4.96e-06	1.65e-05	4.55e-06	4.26e-06	4.55e-06	8.55e-06	1.33e-05	1.09e-05	7.3e-06	1.4e-05	9.86e-06	1.7e-05	4.67e-06	1.21e-05	4.07e-06	1.89e-05	4.81e-06	1.18e-05	0.303371	0.445668	-0.508499
K05939	5.95e-05	4.3e-05	2.73e-05	2.98e-05	3.19e-05	3.42e-05	6.01e-05	1.63e-05	5.11e-05	9.37e-06	1.48e-05	2.84e-05	2.8e-05	6.68e-05	1.22e-05	6.93e-05	4.81e-06	2.96e-05	0.30303	0.445312	0.453208
K16074	9.92e-06	9.92e-06	0	4.26e-06	9.1e-06	4.28e-06	1.33e-05	0	1.46e-05	0	9.86e-06	0	0	1.21e-05	0	1.26e-05	0	5.92e-06	0.303	0.445312	0.281074
K09792	0	3.31e-06	9.1e-06	4.26e-06	4.55e-06	0	6.67e-06	0	7.3e-06	9.37e-06	0	0	4.67e-06	1.21e-05	4.07e-06	1.26e-05	4.81e-06	5.92e-06	0.302626	0.444984	-0.320163
K09748	0.00115057	0.00113061	0.00108769	0.00112869	0.00111509	0.00117201	0.00113763	0.00100631	0.00114201	0.00120812	0.00116351	0.00106643	0.00126128	0.00109291	0.00107941	0.00111561	0.00118765	0.00115439	0.302193	0.444482	-5.22976
K02912	9.92e-06	9.92e-06	9.1e-06	4.26e-06	4.55e-06	1.28e-05	1.33e-05	2.72e-05	1.82e-05	9.37e-06	1.97e-05	2.27e-05	9.34e-06	1.82e-05	8.15e-06	1.89e-05	9.62e-06	2.37e-05	0.302073	0.444439	-0.542839
K03226	0	9.92e-06	4.55e-06	8.52e-06	9.1e-06	0	6.67e-06	5.44e-06	7.3e-06	4.68e-06	1.48e-05	5.67e-06	4.67e-06	1.21e-05	4.07e-06	1.26e-05	4.81e-06	5.92e-06	0.301953	0.444396	-0.450127
K11261	4.46e-05	5.29e-05	6.83e-05	7.67e-05	2.73e-05	1.71e-05	5.67e-05	3.26e-05	4.38e-05	7.49e-05	7.4e-05	6.81e-05	3.74e-05	6.07e-05	3.26e-05	6.3e-05	2.88e-05	6.51e-05	0.301638	0.444066	-0.726498
K19789	2.48e-05	4.3e-05	1.37e-05	1.7e-05	1.82e-05	2.99e-05	2.67e-05	2.18e-05	2.55e-05	2.81e-05	2.47e-05	2.27e-05	2.34e-05	5.46e-05	1.22e-05	5.67e-05	2.4e-05	2.96e-05	0.301469	0.44395	-0.596268
K05303	1.98e-05	1.32e-05	3.64e-05	1.7e-05	2.28e-05	3.85e-05	2.34e-05	1.09e-05	2.92e-05	1.4e-05	9.86e-06	1.13e-05	1.87e-05	1.21e-05	3.26e-05	2.52e-05	2.4e-05	2.37e-05	0.301456	0.44395	0.640549
K09136	2.98e-05	3.97e-05	5.01e-05	2.56e-05	2.28e-05	4.28e-05	3e-05	4.9e-05	2.19e-05	2.34e-05	1.48e-05	3.4e-05	5.14e-05	3.04e-05	2.04e-05	2.52e-05	3.85e-05	2.37e-05	0.300707	0.443095	0.766829
K03072	0.000243007	0.000228104	0.000277611	0.000200182	0.000245774	0.000183928	0.000266893	0.000233899	0.000215267	0.000196672	0.000197206	0.000232573	0.000191528	0.00024894	0.000158857	0.000277326	0.000211565	0.000230877	0.299324	0.44119	1.81774
K02053	2.98e-05	3.64e-05	3.64e-05	5.54e-05	1.82e-05	3.85e-05	3.67e-05	2.18e-05	3.65e-05	3.28e-05	9.86e-06	2.27e-05	4.2e-05	2.43e-05	3.67e-05	1.89e-05	4.33e-05	2.96e-05	0.299277	0.44119	0.7719
K16957	2.98e-05	1.65e-05	3.19e-05	2.98e-05	5.01e-05	3.85e-05	3.34e-05	3.26e-05	3.65e-05	3.28e-05	2.47e-05	2.27e-05	5.14e-05	6.07e-05	4.48e-05	6.3e-05	3.37e-05	2.37e-05	0.298828	0.440724	-0.755815
K03823	0.000396747	0.000370257	0.000432345	0.000455734	0.000409623	0.000384966	0.000420356	0.000397084	0.000372157	0.000412074	0.000384551	0.000442455	0.000359699	0.000467522	0.000443985	0.000504229	0.000370239	0.000432155	0.298139	0.439841	-2.82942
K03649	1.49e-05	9.92e-06	1.37e-05	0	0	4.28e-06	6.67e-06	1.09e-05	1.09e-05	0	1.97e-05	1.13e-05	4.67e-06	3.04e-05	0	3.15e-05	4.81e-06	1.18e-05	0.297608	0.439189	-0.291953
K09740	4.96e-06	2.31e-05	1.82e-05	2.13e-05	4.55e-06	1.71e-05	1.33e-05	1.09e-05	1.46e-05	1.4e-05	9.86e-06	1.13e-05	0	1.21e-05	8.15e-06	2.52e-05	4.81e-06	1.18e-05	0.297083	0.438546	0.495191
K03050	4.96e-06	9.92e-06	9.1e-06	4.26e-06	4.55e-06	8.55e-06	1.33e-05	1.09e-05	7.3e-06	9.37e-06	9.86e-06	1.7e-05	4.67e-06	1.21e-05	4.07e-06	1.26e-05	4.81e-06	1.78e-05	0.29664	0.438025	-0.576007
K19427	0.000218211	0.000125623	0.000200244	0.000174627	0.00013199	0.000149709	0.000200169	0.000206701	0.000178781	0.000196672	0.000167625	0.000215555	0.000182185	0.000188223	0.000203663	0.000163874	0.000216373	0.000177598	0.296314	0.437676	-1.7813
K18471	1.49e-05	1.32e-05	1.82e-05	2.13e-05	1.82e-05	1.71e-05	1.33e-05	0	1.46e-05	9.37e-06	4.93e-06	1.13e-05	0	1.82e-05	1.22e-05	1.89e-05	9.62e-06	1.78e-05	0.295773	0.437008	0.557018
K20429	5.46e-05	4.63e-05	4.55e-05	5.11e-05	5.92e-05	1.71e-05	5e-05	2.18e-05	2.92e-05	2.81e-05	3.94e-05	2.27e-05	9.34e-06	4.86e-05	2.44e-05	6.93e-05	2.88e-05	2.96e-05	0.295065	0.436093	0.617849
K12297	1.49e-05	6.61e-06	1.37e-05	8.52e-06	4.55e-06	4.28e-06	1.33e-05	0	1.46e-05	4.68e-06	9.86e-06	1.13e-05	0	6.07e-06	4.07e-06	6.3e-06	4.81e-06	1.18e-05	0.294916	0.436006	0.441136
K02383	1.49e-05	9.92e-06	1.82e-05	1.28e-05	1.37e-05	8.55e-06	1.33e-05	5.44e-06	1.46e-05	1.4e-05	2.47e-05	1.13e-05	4.67e-06	3.04e-05	8.15e-06	3.15e-05	9.62e-06	1.18e-05	0.294836	0.436006	-0.506539
K21962	0	0	4.55e-06	8.52e-06	4.55e-06	0	0	5.44e-06	0	0	0	0	0	6.07e-06	4.07e-06	0	0	0	0.294827	0.436006	0.175528
K03111	0.00214243	0.00230749	0.00208891	0.00215515	0.0023121	0.00233974	0.00213514	0.00187119	0.00222929	0.00239752	0.00239112	0.00219526	0.00220491	0.0023619	0.00194294	0.00245812	0.00201468	0.00237389	0.294525	0.435823	-3.59773
K01809	0.000565364	0.000561996	0.000518814	0.0005324	0.000568921	0.000474791	0.000553802	0.000500435	0.000554587	0.000557236	0.000576826	0.000584268	0.000509184	0.000588957	0.000509157	0.000567258	0.000557762	0.000526874	0.294274	0.435582	-4.5863
K09960	9.92e-06	1.65e-05	2.28e-05	1.7e-05	3.19e-05	2.57e-05	1.33e-05	2.72e-05	1.46e-05	1.87e-05	1.48e-05	2.84e-05	1.4e-05	3.64e-05	8.15e-06	3.15e-05	3.37e-05	3.55e-05	0.294121	0.435487	-0.648951
K05590	4.96e-06	3.31e-06	9.1e-06	0	0	4.28e-06	3.34e-06	0	0	0	0	5.67e-06	0	6.07e-06	0	0	0	0	0.293243	0.434319	0.190557
K02786	0	6.61e-06	0	4.26e-06	4.55e-06	4.28e-06	3.34e-06	0	0	0	0	0	0	0	0	0	9.62e-06	0	0.292814	0.433815	0.167582
K03090	0.000198373	0.000125623	0.000150183	0.000140554	0.000127438	0.000111212	0.000123438	0.000135988	0.000131349	0.000112384	0.000123253	0.000102105	9.34e-05	0.000188223	0.000101831	0.000163874	0.000120207	0.000106559	0.292147	0.432958	1.22932
K05685	2.48e-05	9.92e-06	1.82e-05	8.52e-06	9.1e-06	1.28e-05	6.67e-06	5.44e-06	1.09e-05	9.37e-06	4.93e-06	5.67e-06	4.67e-06	2.43e-05	0	1.89e-05	4.81e-06	0	0.292101	0.432958	0.366797
K17203	1.98e-05	3.31e-06	9.1e-06	8.52e-06	9.1e-06	1.28e-05	1e-05	1.09e-05	1.09e-05	1.87e-05	9.86e-06	1.7e-05	4.67e-06	3.04e-05	4.07e-06	3.15e-05	9.62e-06	5.92e-06	0.29193	0.432898	-0.418899
K15045	2.98e-05	2.31e-05	2.28e-05	4.26e-06	4.55e-06	8.55e-06	6.67e-06	0	2.55e-05	1.87e-05	1.48e-05	5.67e-06	4.67e-06	6.07e-06	0	1.26e-05	9.62e-06	1.18e-05	0.291297	0.43209	0.350855
K20489	4.96e-06	0	4.55e-06	0	0	4.28e-06	0	0	0	0	0	0	4.67e-06	0	0	0	0	0	0.290549	0.431111	0.140648
K19664	4.96e-06	9.92e-06	4.55e-06	4.26e-06	4.55e-06	8.55e-06	1.33e-05	1.09e-05	7.3e-06	9.37e-06	9.86e-06	1.7e-05	4.67e-06	1.21e-05	4.07e-06	1.26e-05	4.81e-06	1.18e-05	0.2891	0.429091	-0.600492
K00860	2.48e-05	3.64e-05	5.01e-05	2.13e-05	3.64e-05	3.85e-05	2e-05	5.44e-05	2.92e-05	2.81e-05	9.86e-06	1.13e-05	1.87e-05	5.46e-05	2.04e-05	5.04e-05	2.88e-05	2.37e-05	0.289014	0.429091	0.59686
K06176	9.92e-06	1.32e-05	1.37e-05	1.28e-05	9.1e-06	8.55e-06	1.67e-05	1.09e-05	1.46e-05	1.87e-05	9.86e-06	1.7e-05	9.34e-06	1.82e-05	8.15e-06	1.89e-05	1.44e-05	1.18e-05	0.288622	0.428641	-0.978255
K04034	4.96e-06	3.31e-06	0	0	0	0	0	0	0	0	0	5.67e-06	0	6.07e-06	0	1.26e-05	0	0	0.287821	0.427583	-0.14255
K03767	1.98e-05	2.64e-05	3.19e-05	3.83e-05	2.73e-05	7.27e-05	3.67e-05	4.9e-05	3.65e-05	4.21e-05	1.48e-05	3.97e-05	2.34e-05	1.82e-05	3.26e-05	2.52e-05	5.29e-05	2.37e-05	0.287086	0.426619	0.652455
K10213	1.49e-05	1.32e-05	1.82e-05	0	4.55e-06	1.28e-05	1.67e-05	2.18e-05	2.19e-05	2.81e-05	9.86e-06	3.4e-05	1.4e-05	6.07e-06	2.04e-05	1.26e-05	1.92e-05	1.78e-05	0.286568	0.425979	-0.531793
K22293	1.98e-05	2.31e-05	1.37e-05	2.56e-05	3.19e-05	2.57e-05	2.67e-05	3.26e-05	2.55e-05	1.4e-05	2.47e-05	3.97e-05	5.14e-05	1.82e-05	6.52e-05	1.89e-05	2.88e-05	2.37e-05	0.285678	0.424785	-0.601303
K08319	0	3.31e-06	0	0	0	0	0	0	3.65e-06	0	0	0	0	6.07e-06	0	6.3e-06	0	5.92e-06	0.285145	0.424122	-0.158239
K09994	9.92e-06	9.92e-06	9.1e-06	4.26e-06	9.1e-06	0	3.34e-06	5.44e-06	7.3e-06	4.68e-06	0	1.13e-05	0	6.07e-06	8.15e-06	0	4.81e-06	5.92e-06	0.284614	0.423461	0.40495
K03590	0.000461218	0.000396703	0.000436896	0.000396105	0.000414175	0.000402075	0.000423692	0.000304613	0.000350265	0.000355882	0.000384551	0.00036304	0.000341013	0.000418949	0.000268835	0.000504229	0.000245223	0.000402555	0.284216	0.422998	1.62411
K04653	5.46e-05	6.61e-05	6.37e-05	5.11e-05	6.37e-05	5.99e-05	7.01e-05	7.62e-05	6.57e-05	7.02e-05	6.9e-05	5.67e-05	6.54e-05	4.86e-05	5.3e-05	3.78e-05	6.73e-05	5.92e-05	0.284185	0.422998	1.78323
K06875	4.96e-06	9.92e-06	9.1e-06	4.26e-06	4.55e-06	4.28e-06	1e-05	5.44e-06	1.09e-05	4.68e-06	9.86e-06	1.7e-05	4.67e-06	1.21e-05	4.07e-06	1.26e-05	4.81e-06	1.18e-05	0.283957	0.422868	-0.569011
K03436	0.000243007	0.000201658	0.000218448	0.00026407	0.00023212	0.000252366	0.00024354	0.000266536	0.00020797	0.000196672	0.000157764	0.000164503	0.000238242	0.00017608	0.000301421	0.000182783	0.000322156	0.000171678	0.283282	0.421992	1.3235
K03636	4.96e-06	6.61e-06	9.1e-06	1.28e-05	9.1e-06	8.55e-06	6.67e-06	1.09e-05	1.09e-05	1.4e-05	1.97e-05	0	1.87e-05	1.21e-05	8.15e-06	3.15e-05	9.62e-06	0	0.283269	0.421992	-0.404703
K16962	9.92e-06	1.98e-05	1.37e-05	1.7e-05	4.55e-06	1.28e-05	1.67e-05	2.72e-05	1.82e-05	2.81e-05	2.96e-05	2.27e-05	1.4e-05	1.21e-05	8.15e-06	1.89e-05	9.62e-06	3.55e-05	0.282274	0.420747	-0.589661
K00065	4.96e-05	4.3e-05	3.64e-05	7.67e-05	6.37e-05	4.71e-05	5.34e-05	8.7e-05	5.47e-05	5.62e-05	3.94e-05	0.00011345	6.54e-05	6.07e-05	7.74e-05	6.3e-05	5.29e-05	7.1e-05	0.28224	0.420747	-0.908493
K01990	0.00421047	0.00483978	0.00462836	0.00499604	0.00504292	0.00501311	0.00460056	0.00456919	0.00459723	0.00453281	0.00464912	0.0049918	0.0041996	0.00451736	0.0048268	0.00441831	0.00425534	0.00482474	0.282042	0.420656	4.69522
K01392	4.96e-06	0	9.1e-06	0	0	0	3.34e-06	0	0	4.68e-06	0	5.67e-06	0	6.07e-06	4.07e-06	6.3e-06	4.81e-06	0	0.281469	0.41993	-0.248644
K03928	5.46e-05	6.28e-05	6.37e-05	3.83e-05	3.19e-05	5.13e-05	6.67e-05	2.18e-05	4.74e-05	4.68e-05	6.9e-05	6.81e-05	3.74e-05	7.89e-05	3.67e-05	7.56e-05	3.85e-05	6.51e-05	0.28129	0.41979	-0.887036
K00608	0	3.31e-06	0	0	0	0	6.67e-06	0	3.65e-06	4.68e-06	4.93e-06	5.67e-06	0	0	0	0	4.81e-06	5.92e-06	0.281135	0.419688	-0.231027
K03980	0.000208292	0.000185128	0.000213897	0.000187405	0.000172952	0.000136877	0.000213514	0.000168625	0.000178781	0.000117066	0.000152834	0.000141813	0.000121457	0.00024894	0.000101831	0.000271023	0.000149057	0.000147998	0.281083	0.419688	1.05401
K07041	9.92e-06	9.92e-06	4.55e-06	1.28e-05	4.55e-06	8.55e-06	1e-05	1.09e-05	7.3e-06	4.68e-06	9.86e-06	1.13e-05	9.34e-06	1.21e-05	4.07e-06	1.89e-05	1.44e-05	1.18e-05	0.280637	0.4192	-0.704204
K09683	0	3.31e-06	0	4.26e-06	4.55e-06	4.28e-06	3.34e-06	5.44e-06	3.65e-06	0	0	0	0	6.07e-06	0	6.3e-06	4.81e-06	0	0.280555	0.4192	0.285618
K15914	0	0	0	4.26e-06	4.55e-06	0	0	5.44e-06	0	4.68e-06	4.93e-06	0	0	6.07e-06	0	6.3e-06	4.81e-06	0	0.280455	0.419184	-0.236779
K03694	3.97e-05	3.64e-05	4.55e-05	4.26e-05	5.46e-05	5.13e-05	6.34e-05	4.9e-05	5.84e-05	3.75e-05	4.44e-05	3.4e-05	5.14e-05	6.07e-05	4.07e-05	5.04e-05	4.81e-05	2.96e-05	0.280036	0.418685	1.37661
K17734	0.000128943	0.000119011	0.000113775	0.000140554	0.000168401	0.000153986	0.000150127	0.000146867	0.000134998	9.83e-05	0.000123253	0.00013614	0.000144814	0.000109291	0.000199589	8.82e-05	0.000120207	0.000112479	0.279951	0.418685	1.3923
K15303	0	3.31e-06	0	0	0	0	3.34e-06	0	3.65e-06	0	4.93e-06	5.67e-06	0	6.07e-06	0	0	4.81e-06	0	0.279882	0.418685	-0.20613
K07010	0.000347153	0.000476044	0.000473304	0.000481289	0.000350456	0.000384966	0.000463726	0.000413403	0.000430534	0.000501044	0.00036976	0.000504853	0.000453127	0.000473594	0.000411399	0.000378172	0.000447171	0.000556473	0.27878	0.417189	-2.09889
K01921	0.00107617	0.00115044	0.00110134	0.00111165	0.00114695	0.00109074	0.00101086	0.00105526	0.00101066	0.00116598	0.00115858	0.00111748	0.00108377	0.0011172	0.00107941	0.00102737	0.00113476	0.00109519	0.278549	0.416972	-6.37527
K02485	0	0	4.55e-06	0	0	8.55e-06	3.34e-06	0	0	0	0	0	0	0	0	0	4.81e-06	0	0.278399	0.416874	0.133287
K02064	9.92e-06	9.92e-06	9.1e-06	1.28e-05	9.1e-06	4.28e-06	1.67e-05	1.63e-05	1.09e-05	1.4e-05	2.47e-05	2.27e-05	0	1.82e-05	4.07e-06	1.89e-05	9.62e-06	1.78e-05	0.278278	0.416822	-0.539673
K19168	0	6.61e-06	1.37e-05	4.26e-06	0	8.55e-06	0	0	0	0	4.93e-06	0	4.67e-06	0	0	0	4.81e-06	0	0.278185	0.41681	0.18547
K15554	4.96e-05	3.64e-05	7.28e-05	2.98e-05	4.55e-05	6.42e-05	4.34e-05	5.44e-05	4.74e-05	3.75e-05	1.48e-05	5.67e-05	3.74e-05	3.04e-05	5.3e-05	5.04e-05	3.85e-05	5.92e-05	0.277874	0.41647	0.915318
K12308	0.000366991	0.000452903	0.000418692	0.000400365	0.000373212	0.000346469	0.00041702	0.000494996	0.0003904	0.000351199	0.000483154	0.000470818	0.000401742	0.000437164	0.000529523	0.000365566	0.000490446	0.000390715	0.277777	0.416453	-2.13831
K21364	9.92e-06	9.92e-06	1.37e-05	1.28e-05	1.37e-05	4.28e-06	6.67e-06	1.63e-05	7.3e-06	0	9.86e-06	5.67e-06	9.34e-06	6.07e-06	1.63e-05	1.26e-05	0	1.18e-05	0.277585	0.416293	0.53009
K08322	1.49e-05	2.64e-05	2.73e-05	2.13e-05	1.37e-05	1.71e-05	1.67e-05	2.18e-05	2.19e-05	2.81e-05	2.96e-05	2.27e-05	4.2e-05	1.21e-05	3.26e-05	1.26e-05	2.88e-05	1.18e-05	0.276677	0.415057	-0.752134
K14092	0	3.31e-06	0	0	0	0	3.34e-06	0	0	0	0	5.67e-06	0	0	0	6.3e-06	0	5.92e-06	0.276638	0.415057	-0.160391
K02966	1.49e-05	1.65e-05	1.37e-05	8.52e-06	9.1e-06	8.55e-06	1.67e-05	1.63e-05	1.82e-05	1.4e-05	2.47e-05	2.84e-05	4.67e-06	3.04e-05	4.07e-06	1.89e-05	4.81e-06	3.55e-05	0.276573	0.415057	-0.492255
K02196	4.96e-06	3.31e-06	4.55e-06	4.26e-06	4.55e-06	4.28e-06	3.34e-06	5.44e-06	3.65e-06	4.68e-06	4.93e-06	0	4.67e-06	0	4.07e-06	6.3e-06	4.81e-06	0	0.276199	0.414722	0.561891
K09970	4.96e-06	3.31e-06	4.55e-06	4.26e-06	4.55e-06	4.28e-06	3.34e-06	5.44e-06	3.65e-06	4.68e-06	4.93e-06	0	4.67e-06	0	4.07e-06	6.3e-06	4.81e-06	0	0.276199	0.414722	0.561891
K01194	8.93e-05	4.63e-05	5.01e-05	3.83e-05	8.65e-05	6.42e-05	5.67e-05	7.07e-05	5.47e-05	6.09e-05	3.94e-05	1.7e-05	6.54e-05	3.64e-05	8.15e-05	4.41e-05	8.65e-05	2.37e-05	0.27575	0.414303	0.731969
K08640	6.94e-05	3.97e-05	7.74e-05	4.69e-05	5.46e-05	6.42e-05	6.34e-05	5.44e-05	5.84e-05	4.21e-05	5.92e-05	5.67e-05	4.2e-05	6.07e-05	6.11e-05	5.04e-05	6.73e-05	3.55e-05	0.275247	0.413674	1.38811
K02977	4.96e-06	1.32e-05	9.1e-06	8.52e-06	4.55e-06	8.55e-06	1.33e-05	1.09e-05	1.46e-05	4.68e-06	1.97e-05	1.7e-05	9.34e-06	1.21e-05	4.07e-06	1.26e-05	1.92e-05	1.18e-05	0.275074	0.413541	-0.642251
K20487	2.98e-05	2.31e-05	3.19e-05	2.98e-05	2.28e-05	3.85e-05	2e-05	3.26e-05	2.55e-05	1.4e-05	9.86e-06	2.84e-05	1.87e-05	2.43e-05	4.07e-05	2.52e-05	3.85e-05	1.18e-05	0.274914	0.413427	0.809386
K05817	0	3.31e-06	4.55e-06	0	4.55e-06	0	3.34e-06	0	0	0	0	0	0	0	0	0	0	5.92e-06	0.274583	0.413056	0.163287
K09992	1.98e-05	3.97e-05	2.28e-05	2.13e-05	1.82e-05	1.71e-05	2.67e-05	2.18e-05	1.82e-05	1.87e-05	1.97e-05	2.27e-05	1.4e-05	2.43e-05	8.15e-06	1.89e-05	4.81e-06	3.55e-05	0.273901	0.412157	0.712062
K01138	2.48e-05	3.31e-05	2.73e-05	2.13e-05	9.1e-06	1.28e-05	4e-05	2.18e-05	4.38e-05	1.87e-05	3.45e-05	2.84e-05	2.34e-05	3.04e-05	2.85e-05	4.41e-05	2.88e-05	4.74e-05	0.273647	0.411902	-0.767484
K05805	4.96e-06	3.31e-06	4.55e-06	4.26e-06	4.55e-06	4.28e-06	6.67e-06	5.44e-06	1.09e-05	4.68e-06	0	5.67e-06	9.34e-06	0	4.07e-06	0	9.62e-06	0	0.273613	0.411902	0.393809
K03695	0.00066951	0.000608279	0.000609834	0.000651657	0.000673603	0.000568894	0.000627198	0.0006745	0.000638504	0.000660255	0.000596547	0.000623975	0.000616626	0.000595028	0.000627281	0.000630287	0.000639503	0.000586073	0.27346	0.411872	5.74162
K03042	9.92e-06	1.32e-05	1.37e-05	4.26e-06	4.55e-06	1.28e-05	2e-05	2.18e-05	7.3e-06	1.4e-05	1.48e-05	1.7e-05	9.34e-06	2.43e-05	4.07e-06	1.89e-05	9.62e-06	2.96e-05	0.27307	0.411413	-0.544508
K17234	1.49e-05	2.98e-05	1.82e-05	1.28e-05	2.28e-05	1.28e-05	3.34e-05	3.26e-05	3.28e-05	1.4e-05	9.86e-06	3.97e-05	9.34e-06	2.43e-05	2.04e-05	2.52e-05	1.44e-05	5.92e-06	0.273025	0.411413	0.592124
K03501	0.00124479	0.00124631	0.00118781	0.00120961	0.00121522	0.00120623	0.00120435	0.00114774	0.00113106	0.001269	0.00126705	0.00124795	0.00126128	0.00125685	0.00110793	0.00119124	0.00114918	0.00129646	0.272662	0.411051	-6.42288
K19002	0.000104146	0.000119011	0.000145632	0.000119258	9.56e-05	0.000106935	0.000103421	0.000163185	0.000105809	9.83e-05	9.37e-05	0.00013614	0.000107442	7.89e-05	9.78e-05	8.82e-05	0.000134632	0.000124318	0.272337	0.410686	1.45955
K03222	4.96e-06	6.61e-06	4.55e-06	8.52e-06	9.1e-06	0	6.67e-06	5.44e-06	3.65e-06	4.68e-06	9.86e-06	5.67e-06	4.67e-06	1.21e-05	4.07e-06	1.26e-05	4.81e-06	5.92e-06	0.271941	0.410216	-0.572918
K00823	2.48e-05	1.65e-05	1.82e-05	2.13e-05	1.37e-05	3.42e-05	2.67e-05	2.18e-05	2.19e-05	9.37e-06	9.86e-06	1.13e-05	2.34e-05	3.04e-05	1.63e-05	3.15e-05	1.92e-05	1.18e-05	0.271385	0.409504	0.755544
K05815	8.93e-05	0.000105788	8.65e-05	0.00010648	0.000113784	5.99e-05	0.000126774	0.000130548	0.000113106	4.68e-05	7.89e-05	7.94e-05	8.41e-05	0.000157865	7.33e-05	0.000138663	7.69e-05	4.74e-05	0.271352	0.409504	0.864793
K02585	2.98e-05	2.31e-05	2.28e-05	3.83e-05	5.01e-05	3.85e-05	3e-05	2.72e-05	1.82e-05	2.81e-05	3.94e-05	3.97e-05	2.8e-05	4.25e-05	4.48e-05	5.04e-05	1.44e-05	4.14e-05	0.270861	0.408965	-0.899695
K01213	4.96e-06	3.31e-06	4.55e-06	4.26e-06	4.55e-06	4.28e-06	3.34e-06	5.44e-06	3.65e-06	4.68e-06	4.93e-06	5.67e-06	4.67e-06	6.07e-06	1.22e-05	6.3e-06	4.81e-06	0	0.27066	0.408787	-0.600252
K16874	4.96e-06	3.31e-06	0	0	0	0	3.34e-06	0	3.65e-06	0	0	5.67e-06	0	0	0	0	0	0	0.270459	0.408611	0.164354
K02924	4.96e-06	9.92e-06	9.1e-06	4.26e-06	4.55e-06	4.28e-06	1e-05	1.09e-05	7.3e-06	9.37e-06	9.86e-06	1.13e-05	4.67e-06	1.21e-05	4.07e-06	1.26e-05	4.81e-06	1.18e-05	0.269016	0.406556	-0.721565
K02337	0.000853005	0.000839689	0.000860139	0.000830544	0.000855658	0.000748545	0.000847384	0.00077785	0.000842826	0.00089907	0.000833194	0.000890583	0.00085954	0.000843969	0.000867603	0.000819372	0.000778944	0.00084655	0.26901	0.406556	-6.24142
K08998	0.000733981	0.000819854	0.000778221	0.000830544	0.00076463	0.000804151	0.000804014	0.000696258	0.000817286	0.000814782	0.000838124	0.000833858	0.000808154	0.000789323	0.0007006	0.000888704	0.000745285	0.000893909	0.268731	0.406375	-4.12831
K08315	0	6.61e-06	4.55e-06	0	0	4.28e-06	1e-05	0	7.3e-06	0	4.93e-06	5.67e-06	0	0	0	0	0	5.92e-06	0.268664	0.406375	0.230357
K01966	6.45e-05	4.96e-05	5.46e-05	4.69e-05	3.64e-05	4.71e-05	5e-05	7.62e-05	5.47e-05	4.68e-05	4.93e-05	5.67e-05	2.8e-05	6.07e-05	4.07e-05	6.3e-05	2.88e-05	4.74e-05	0.268031	0.405568	1.16972
K02473	6.45e-05	7.27e-05	6.37e-05	4.26e-05	6.83e-05	5.99e-05	9.67e-05	8.16e-05	9.49e-05	6.09e-05	6.41e-05	9.08e-05	6.54e-05	4.86e-05	4.48e-05	4.41e-05	5.29e-05	8.88e-05	0.267969	0.405568	1.08495
K07076	4.96e-06	1.32e-05	9.1e-06	8.52e-06	9.1e-06	2.57e-05	2e-05	1.09e-05	1.46e-05	1.4e-05	4.93e-06	5.67e-06	1.87e-05	1.82e-05	4.07e-06	1.26e-05	0	5.92e-06	0.267906	0.405568	0.476064
K03435	0	3.31e-06	0	0	0	0	3.34e-06	0	0	0	0	5.67e-06	4.67e-06	0	0	0	9.62e-06	0	0.267741	0.405505	-0.152207
K02795	7.44e-05	5.29e-05	4.55e-05	5.54e-05	2.28e-05	4.28e-05	4e-05	7.07e-05	6.2e-05	3.28e-05	3.94e-05	3.4e-05	5.61e-05	4.25e-05	6.11e-05	2.52e-05	5.77e-05	4.74e-05	0.26744	0.405175	0.935399
K07503	4.96e-06	3.31e-06	4.55e-06	0	0	0	3.34e-06	0	7.3e-06	9.37e-06	0	1.13e-05	0	6.07e-06	0	0	4.81e-06	1.18e-05	0.26666	0.404117	-0.256839
K07570	3.97e-05	6.61e-05	8.19e-05	3.83e-05	4.1e-05	5.13e-05	3.67e-05	4.35e-05	5.84e-05	5.62e-05	4.44e-05	6.81e-05	7.47e-05	7.89e-05	2.85e-05	5.67e-05	4.33e-05	9.47e-05	0.266615	0.404117	-0.865244
K01905	8.43e-05	6.61e-05	5.46e-05	5.11e-05	6.83e-05	3.85e-05	7.01e-05	5.98e-05	7.3e-05	2.81e-05	5.92e-05	3.4e-05	2.8e-05	9.11e-05	8.15e-06	9.45e-05	1.44e-05	8.29e-05	0.265978	0.403334	0.614943
K00647	0.000168617	9.26e-05	0.000159285	7.67e-05	9.1e-05	0.000124045	0.000126774	0.000130548	8.76e-05	7.49e-05	0.000113393	6.81e-05	9.81e-05	0.000151793	0.000105905	0.00013236	9.14e-05	7.1e-05	0.265169	0.402232	1.00578
K06891	4.46e-05	5.29e-05	7.28e-05	5.54e-05	6.37e-05	6.84e-05	7.01e-05	9.25e-05	5.84e-05	3.75e-05	4.93e-05	2.84e-05	5.61e-05	8.5e-05	6.11e-05	8.82e-05	5.77e-05	2.37e-05	0.265129	0.402232	0.89322
K09125	0.000312438	0.000350421	0.000286713	0.000281107	0.000291288	0.000286586	0.000300254	0.000266536	0.000335671	0.000248181	0.000236647	0.000260935	0.000280285	0.00035216	0.000285128	0.000359263	0.000245223	0.000260477	0.264787	0.401901	2.20914
K03168	0.000857965	0.000833077	0.000787323	0.000775174	0.000851106	0.000782764	0.00076398	0.00078329	0.000788097	0.000861609	0.000843054	0.000839531	0.000784797	0.00077718	0.000802431	0.000794161	0.000798177	0.000929429	0.264634	0.401794	-5.44136
K10005	2.48e-05	6.61e-06	4.55e-06	4.26e-06	9.1e-06	0	6.67e-06	0	1.09e-05	1.4e-05	1.48e-05	1.13e-05	4.67e-06	6.07e-06	8.15e-06	6.3e-06	1.44e-05	1.78e-05	0.264421	0.401595	-0.414465
K07088	0.000902599	0.00106449	0.00103763	0.00114146	0.00100585	0.00104368	0.00106423	0.00114774	0.00111647	0.00102082	0.00108956	0.00112883	0.00109778	0.00109898	0.00121383	0.00101476	0.00113957	0.00105967	0.263941	0.40099	-4.41282
K00175	0.000644713	0.000621502	0.000587079	0.000592028	0.000509754	0.00054323	0.000630534	0.000685379	0.000642153	0.000519775	0.000562036	0.00052187	0.000583927	0.000667889	0.000517303	0.000712224	0.000519296	0.000538713	0.263284	0.400117	2.62188
K01525	2.48e-05	1.32e-05	1.82e-05	1.28e-05	1.37e-05	1.71e-05	1e-05	1.09e-05	1.09e-05	1.4e-05	1.48e-05	0	1.87e-05	1.21e-05	1.63e-05	1.26e-05	1.44e-05	0	0.263123	0.399996	0.633707
K06167	0.000366991	0.000353727	0.000314019	0.000332217	0.000336801	0.000325082	0.000397003	0.000315492	0.000412291	0.000351199	0.000305669	0.000311988	0.000336342	0.000303586	0.000329934	0.000346658	0.000384663	0.000331516	0.262652	0.399404	3.14524
K07100	0	3.31e-06	4.55e-06	0	4.55e-06	4.28e-06	3.34e-06	0	7.3e-06	4.68e-06	0	0	0	6.07e-06	4.07e-06	0	0	0	0.26231	0.399007	0.262174
K19804	9.92e-06	6.61e-06	1.37e-05	4.26e-06	4.55e-06	8.55e-06	3.34e-06	1.09e-05	3.65e-06	4.68e-06	4.93e-06	0	9.34e-06	6.07e-06	4.07e-06	1.26e-05	4.81e-06	0	0.262249	0.399007	0.459196
K07636	0.000813331	0.00080663	0.000750915	0.000792211	0.000778284	0.000774209	0.000790669	0.000870322	0.000817286	0.000791369	0.000734591	0.000743098	0.000756769	0.00081361	0.000830944	0.000756344	0.000855876	0.000698551	0.262056	0.39887	5.19083
K07707	6.45e-05	6.28e-05	7.28e-05	8.09e-05	0.000113784	0.000106935	4e-05	4.9e-05	3.28e-05	7.49e-05	7.89e-05	4.54e-05	4.67e-05	5.46e-05	3.67e-05	5.67e-05	2.88e-05	8.29e-05	0.261647	0.398371	0.747072
K00841	5.46e-05	2.98e-05	6.37e-05	5.54e-05	5.46e-05	6.84e-05	5e-05	4.35e-05	4.01e-05	4.68e-05	3.94e-05	3.4e-05	4.2e-05	2.43e-05	4.89e-05	2.52e-05	7.21e-05	5.92e-05	0.261529	0.398315	0.975143
K20391	2.48e-05	1.98e-05	4.55e-06	4.26e-06	4.55e-06	2.14e-05	2e-05	1.63e-05	2.92e-05	9.37e-06	1.97e-05	5.67e-06	1.4e-05	0	1.63e-05	0	2.4e-05	1.18e-05	0.260613	0.397043	0.43729
K01870	0.000798453	0.000780183	0.000755466	0.000698508	0.000801041	0.000761377	0.000730619	0.000728895	0.000700531	0.0008101	0.000774032	0.000782806	0.000766112	0.000710391	0.000741332	0.000750041	0.000769327	0.00084063	0.260255	0.396622	-5.66621
K03489	4.96e-06	3.31e-06	0	1.28e-05	1.37e-05	1.28e-05	1e-05	0	1.09e-05	0	0	0	0	6.07e-06	1.22e-05	1.89e-05	0	0	0.259874	0.396164	0.26521
K00230	3.97e-05	5.29e-05	5.01e-05	4.26e-05	2.28e-05	3.85e-05	5.34e-05	3.26e-05	5.11e-05	6.56e-05	4.44e-05	5.11e-05	5.14e-05	4.25e-05	3.26e-05	4.41e-05	6.25e-05	4.14e-05	0.258909	0.394816	-1.24529
K02414	1.49e-05	3.64e-05	4.1e-05	4.26e-05	5.46e-05	5.13e-05	5.67e-05	4.35e-05	5.84e-05	2.81e-05	1.97e-05	5.67e-05	4.2e-05	2.43e-05	6.92e-05	2.52e-05	3.85e-05	1.78e-05	0.258755	0.394703	0.730469
K00030	0.00022317	0.000158681	0.000177489	0.00016185	0.000168401	0.00019676	0.000186825	0.000201262	0.000178781	0.000149845	0.000197206	0.000119123	0.000191528	0.000200367	0.00017515	0.000207995	0.000144249	0.000130238	0.258742	0.394703	1.81902
K08298	0	9.92e-06	1.37e-05	0	0	0	6.67e-06	0	7.3e-06	4.68e-06	0	5.67e-06	9.34e-06	6.07e-06	8.15e-06	6.3e-06	4.81e-06	1.78e-05	0.258729	0.394703	-0.314172
K02532	1.49e-05	9.92e-06	0	8.52e-06	4.55e-06	8.55e-06	1.33e-05	5.44e-06	1.09e-05	0	4.93e-06	0	9.34e-06	6.07e-06	1.22e-05	6.3e-06	9.62e-06	5.92e-06	0.258487	0.394665	0.475061
K17716	0.000327316	0.000307445	0.000300366	0.000255552	0.000300391	0.000290863	0.000240203	0.000244778	0.000280942	0.000285642	0.00034511	0.000311988	0.00029897	0.000255012	0.000329934	0.000214297	0.000331772	0.000378875	0.25835	0.394578	-2.05645
K08372	9.92e-06	6.61e-06	1.37e-05	8.52e-06	4.55e-06	0	6.67e-06	0	3.65e-06	4.68e-06	9.86e-06	0	4.67e-06	0	4.07e-06	0	4.81e-06	5.92e-06	0.258114	0.394341	0.353639
K06403	0.000188455	0.00015207	0.000159285	0.000178886	0.000177503	0.000222425	0.000176816	0.000195822	0.000189727	0.00014048	0.000123253	0.00013614	0.000214885	9.11e-05	0.000293274	0.000100846	0.00019714	9.47e-05	0.257916	0.394162	0.964003
K15551	4.96e-06	3.31e-06	4.55e-06	0	4.55e-06	0	6.67e-06	0	1.46e-05	0	0	0	9.34e-06	0	8.15e-06	0	0	0	0.257492	0.393636	0.210552
K02340	0.00105138	0.000905806	0.000987567	0.000911468	0.000942134	0.00093675	0.00087741	0.000886641	0.000890258	0.00098804	0.000981098	0.000930291	0.000985668	0.000935045	0.000940922	0.000939127	0.000903959	0.00102415	0.257475	0.393636	-5.65221
K03617	0.000758778	0.000899194	0.000760017	0.000830544	0.00076463	0.000829815	0.000837376	0.000864883	0.000791745	0.000880339	0.000828264	0.000913273	0.000882897	0.000716463	0.000936848	0.00072483	0.00095685	0.00084655	0.257287	0.393568	-3.41476
K01053	0	0	0	0	0	0	3.34e-06	5.44e-06	0	0	0	1.13e-05	0	0	0	0	4.81e-06	1.18e-05	0.257266	0.393568	-0.1523
K03739	4.96e-06	9.92e-06	4.55e-06	8.52e-06	4.55e-06	4.28e-06	1e-05	5.44e-06	7.3e-06	9.37e-06	9.86e-06	1.7e-05	4.67e-06	6.07e-06	1.22e-05	6.3e-06	4.81e-06	5.92e-06	0.25677	0.393024	-0.647419
K03430	9.92e-06	1.65e-05	3.19e-05	1.28e-05	1.82e-05	4.28e-06	1.67e-05	4.35e-05	2.19e-05	1.87e-05	2.47e-05	2.84e-05	1.4e-05	4.25e-05	2.04e-05	5.04e-05	1.92e-05	1.78e-05	0.256237	0.39233	-0.543651
K20859	0	3.31e-06	4.55e-06	4.26e-06	0	4.28e-06	0	1.09e-05	7.3e-06	0	0	1.13e-05	4.67e-06	1.21e-05	8.15e-06	1.89e-05	0	5.92e-06	0.256027	0.392132	-0.28868
K03049	4.96e-06	9.92e-06	4.55e-06	4.26e-06	4.55e-06	8.55e-06	1e-05	1.09e-05	7.3e-06	9.37e-06	9.86e-06	1.13e-05	4.67e-06	1.21e-05	4.07e-06	1.26e-05	4.81e-06	1.18e-05	0.255939	0.39212	-0.74545
K21757	1.49e-05	3.31e-06	1.37e-05	1.28e-05	1.82e-05	4.28e-06	6.67e-06	1.09e-05	7.3e-06	2.34e-05	1.48e-05	5.67e-06	9.34e-06	1.82e-05	2.04e-05	1.26e-05	4.81e-06	1.18e-05	0.255577	0.391687	-0.588263
K22044	9.42e-05	9.26e-05	0.000118326	9.8e-05	0.00010013	0.00011549	7.34e-05	0.000103351	9.85e-05	8.43e-05	8.38e-05	0.000102105	6.54e-05	0.000115363	7.33e-05	0.000126057	3.37e-05	0.000100639	0.255564	0.391687	1.22761
K02343	0.000957151	0.000975229	0.000996669	0.000983875	0.00102861	0.000941028	0.000967486	0.000875762	0.000959581	0.00098804	0.00100575	0.00101538	0.000971654	0.00091683	0.00101831	0.000983247	0.000952042	0.00103007	0.2555	0.391687	-7.17058
K13652	2.98e-05	6.61e-06	5.46e-05	5.54e-05	3.64e-05	1.28e-05	3.34e-05	4.9e-05	3.65e-05	1.87e-05	1.48e-05	3.4e-05	2.8e-05	3.04e-05	3.67e-05	3.78e-05	2.88e-05	1.78e-05	0.254898	0.391015	0.666815
K08264	4.96e-06	9.92e-06	4.55e-06	4.26e-06	9.1e-06	8.55e-06	1e-05	1.09e-05	1.09e-05	4.68e-06	9.86e-06	1.13e-05	4.67e-06	2.43e-05	4.07e-06	1.89e-05	9.62e-06	1.18e-05	0.254578	0.390646	-0.530871
K19586	0	6.61e-06	0	0	4.55e-06	0	3.34e-06	1.09e-05	0	4.68e-06	4.93e-06	5.67e-06	4.67e-06	1.21e-05	0	6.3e-06	0	5.92e-06	0.254155	0.390119	-0.296888
K06910	6.94e-05	7.27e-05	5.92e-05	6.81e-05	6.83e-05	5.13e-05	7.01e-05	5.44e-05	5.11e-05	5.15e-05	3.94e-05	6.81e-05	5.14e-05	7.29e-05	3.67e-05	8.82e-05	2.88e-05	5.33e-05	0.253053	0.388548	1.14677
K00197	9.92e-05	6.61e-05	0.000100122	8.94e-05	5.92e-05	6.42e-05	6.67e-05	7.62e-05	5.47e-05	0.000103018	8.87e-05	7.94e-05	7.94e-05	7.89e-05	8.15e-05	5.67e-05	9.62e-05	8.88e-05	0.25289	0.388421	-1.50335
K21579	0	6.61e-06	0	8.52e-06	0	8.55e-06	6.67e-06	1.09e-05	7.3e-06	4.68e-06	4.93e-06	1.7e-05	2.34e-05	6.07e-06	4.07e-06	6.3e-06	4.81e-06	5.92e-06	0.252177	0.387446	-0.355964
K03410	9.42e-05	8.26e-05	7.28e-05	0.000136294	0.000154747	0.000183928	0.000133446	0.000157746	0.000142295	8.9e-05	9.37e-05	0.000107778	0.000107442	7.89e-05	0.000203663	8.19e-05	0.000120207	8.29e-05	0.251609	0.386695	0.895916
K17758	0.000629835	0.000621502	0.000678099	0.000613324	0.000650846	0.000650164	0.000630534	0.0006745	0.000609316	0.000632159	0.000571896	0.000601285	0.000611955	0.000661817	0.0007006	0.000611378	0.000634695	0.000544633	0.251584	0.386695	4.90381
K07642	0	0	0	4.26e-06	0	0	3.34e-06	0	3.65e-06	4.68e-06	9.86e-06	5.67e-06	0	0	0	0	0	5.92e-06	0.251461	0.386695	-0.204212
K08659	4.46e-05	3.64e-05	4.1e-05	2.56e-05	5.01e-05	8.55e-06	3.67e-05	3.81e-05	4.01e-05	2.81e-05	1.97e-05	3.97e-05	4.67e-06	4.25e-05	1.63e-05	1.89e-05	2.88e-05	5.33e-05	0.251182	0.386404	0.674216
K21688	0	0	4.55e-06	0	4.55e-06	4.28e-06	6.67e-06	5.44e-06	3.65e-06	0	0	0	9.34e-06	0	0	0	4.81e-06	0	0.251179	0.386404	0.235032
K06981	4.96e-06	9.92e-06	9.1e-06	4.26e-06	4.55e-06	8.55e-06	6.67e-06	1.09e-05	7.3e-06	4.68e-06	9.86e-06	1.7e-05	4.67e-06	1.21e-05	4.07e-06	1.26e-05	4.81e-06	1.78e-05	0.251045	0.386404	-0.585765
K07043	0.000753819	0.000723984	0.000823731	0.000698508	0.000801041	0.000705771	0.000757308	0.000723455	0.000722422	0.000777321	0.000724731	0.0006807	0.000747426	0.000716463	0.000643574	0.000737435	0.000644311	0.00079327	0.250789	0.386162	4.38691
K00588	9.92e-06	9.92e-06	2.28e-05	0	0	4.28e-06	3.34e-06	0	0	0	0	0	0	6.07e-06	0	1.26e-05	0	0	0.249923	0.38495	0.178486
K02885	9.92e-06	1.65e-05	1.37e-05	4.26e-06	1.82e-05	1.28e-05	2e-05	2.18e-05	1.46e-05	1.87e-05	1.48e-05	2.27e-05	9.34e-06	3.04e-05	8.15e-06	2.52e-05	9.62e-06	2.96e-05	0.249819	0.384911	-0.669034
K00892	0	0	4.55e-06	0	0	4.28e-06	0	0	0	4.68e-06	0	5.67e-06	0	0	0	0	4.81e-06	5.92e-06	0.249037	0.383828	-0.200439
K01959	0	3.31e-06	9.1e-06	4.26e-06	4.55e-06	0	1e-05	0	3.65e-06	9.37e-06	0	5.67e-06	4.67e-06	6.07e-06	4.07e-06	6.3e-06	4.81e-06	1.18e-05	0.248995	0.383828	-0.402178
K01770	0.00089268	0.000833077	0.000891996	0.000864617	0.000832901	0.000919641	0.000860729	0.00089208	0.000864717	0.000880339	0.000941657	0.000856548	0.000920268	0.000862184	0.000977581	0.00090131	0.00100974	0.00077551	0.24866	0.383488	-4.81713
K00073	9.92e-06	9.92e-06	9.1e-06	1.7e-05	1.37e-05	8.55e-06	1.33e-05	5.44e-06	1.46e-05	4.68e-06	1.48e-05	1.13e-05	1.4e-05	1.82e-05	2.04e-05	1.89e-05	9.62e-06	1.18e-05	0.248446	0.383279	-0.835988
K13888	3.97e-05	3.31e-05	1.82e-05	2.98e-05	1.37e-05	5.13e-05	2.67e-05	2.18e-05	2.19e-05	1.4e-05	2.47e-05	3.4e-05	2.34e-05	3.04e-05	1.22e-05	3.15e-05	9.62e-06	2.37e-05	0.247439	0.381846	0.721038
K01338	0.000823249	0.00086283	0.000882894	0.000864617	0.000882966	0.000846925	0.000900763	0.000973673	0.000926743	0.000913118	0.000867705	0.000947308	0.00089224	0.000843969	0.000932775	0.000876098	0.000942425	0.000970868	0.247168	0.381548	-6.02199
K09765	0.000882761	0.000905806	0.000882894	0.000873136	0.000942134	0.000919641	0.000890754	0.000750653	0.000893906	0.000959945	0.000986028	0.000941636	0.000934283	0.000862184	0.000835017	0.000920218	0.000831835	0.000953108	0.245658	0.379336	-4.76125
K07317	3.47e-05	6.28e-05	6.83e-05	7.67e-05	7.74e-05	7.7e-05	5.67e-05	5.98e-05	5.11e-05	6.56e-05	5.92e-05	6.81e-05	7.94e-05	9.71e-05	6.52e-05	6.93e-05	5.29e-05	7.7e-05	0.245469	0.379164	-1.44016
K16924	0.000119024	7.93e-05	0.000104673	0.000132035	0.00010013	8.98e-05	0.000123438	0.000141427	0.000134998	9.83e-05	9.37e-05	9.08e-05	8.41e-05	8.5e-05	0.000158857	6.93e-05	0.000129824	8.88e-05	0.245422	0.379164	1.27024
K02452	0	0	4.55e-06	0	0	0	0	0	0	4.68e-06	0	0	0	0	0	0	4.81e-06	5.92e-06	0.245419	0.379164	-0.153108
K02173	1.49e-05	1.32e-05	4.55e-06	8.52e-06	1.37e-05	1.28e-05	1.33e-05	1.09e-05	1.82e-05	9.37e-06	3.45e-05	1.7e-05	0	3.64e-05	4.07e-06	5.67e-05	0	2.37e-05	0.245191	0.379094	-0.339492
K11617	4.96e-06	3.31e-06	0	8.52e-06	4.55e-06	0	3.34e-06	0	3.65e-06	4.68e-06	0	0	0	0	4.07e-06	0	0	5.92e-06	0.244783	0.378582	0.262908
K03979	0.000922436	0.00100168	0.000996669	0.000890172	0.00099675	0.000958137	0.000947469	0.00089208	0.00098877	0.00100677	0.000986028	0.000958653	0.000976325	0.00098969	0.000883896	0.000995853	0.000995317	0.00101823	0.244589	0.378402	-6.71644
K15778	0.000104146	0.000102482	0.000154734	9.8e-05	0.000109233	9.41e-05	0.000103421	8.16e-05	9.85e-05	9.83e-05	0.000103533	7.94e-05	7.01e-05	0.000121434	4.48e-05	0.000138663	6.73e-05	9.47e-05	0.24392	0.377486	1.15545
K06404	0.000188455	0.000138846	0.000145632	0.000174627	0.000172952	0.000222425	0.000163472	0.000217581	0.00018243	0.000135797	0.000123253	0.000124795	0.000219556	9.71e-05	0.000281054	6.93e-05	0.00019714	8.29e-05	0.243691	0.377251	0.894332
K18359	0	0	0	0	0	4.28e-06	0	0	0	0	0	0	4.67e-06	6.07e-06	4.07e-06	0	0	0	0.243224	0.376647	-0.152374
K00332	6.94e-05	3.64e-05	4.1e-05	4.26e-05	3.19e-05	4.28e-05	7.34e-05	2.18e-05	5.47e-05	1.4e-05	2.96e-05	3.4e-05	3.27e-05	6.07e-05	2.04e-05	6.3e-05	2.4e-05	4.74e-05	0.242433	0.37554	0.707252
K01076	4.96e-06	1.32e-05	1.37e-05	8.52e-06	9.1e-06	4.28e-06	3.34e-06	5.44e-06	3.65e-06	9.37e-06	9.86e-06	1.13e-05	4.67e-06	3.64e-05	4.07e-06	1.26e-05	4.81e-06	1.18e-05	0.242282	0.375426	-0.373052
K01297	0.000342194	0.00024794	0.000263958	0.000238515	0.000245774	0.000248089	0.000280237	0.000201262	0.000244456	0.000224768	0.000251437	0.0002269	0.000252256	0.000267156	0.000199589	0.000283629	0.000201948	0.000230877	0.2417	0.374642	2.16504
K02200	1.98e-05	1.32e-05	1.82e-05	1.7e-05	1.82e-05	1.71e-05	1.33e-05	2.18e-05	2.19e-05	1.87e-05	9.86e-06	0	1.87e-05	1.82e-05	1.63e-05	2.52e-05	1.92e-05	0	0.241461	0.37439	0.706659
K22424	4.96e-06	9.92e-06	9.1e-06	8.52e-06	1.82e-05	2.57e-05	0	1.63e-05	3.65e-06	9.37e-06	4.93e-06	0	4.67e-06	1.21e-05	4.07e-06	1.26e-05	9.62e-06	5.92e-06	0.241124	0.373987	0.409183
K01208	4.46e-05	9.26e-05	0.000104673	6.81e-05	0.00010013	5.99e-05	9.67e-05	7.07e-05	0.000102161	8.9e-05	0.000103533	0.000102105	6.54e-05	0.000109291	8.55e-05	9.45e-05	0.000100974	8.29e-05	0.240506	0.373147	-1.42737
K12268	4.96e-06	3.31e-06	0	4.26e-06	4.55e-06	1.28e-05	6.67e-06	0	3.65e-06	0	0	0	1.4e-05	0	4.07e-06	0	0	0	0.240379	0.373068	0.22388
K17315	0	3.31e-06	4.55e-06	4.26e-06	1.37e-05	4.28e-06	6.67e-06	0	7.3e-06	4.68e-06	9.86e-06	5.67e-06	9.34e-06	6.07e-06	8.15e-06	6.3e-06	4.81e-06	5.92e-06	0.239538	0.37188	-0.534803
K02944	4.96e-06	9.92e-06	4.55e-06	4.26e-06	4.55e-06	8.55e-06	1e-05	1.09e-05	1.09e-05	4.68e-06	9.86e-06	1.7e-05	4.67e-06	1.21e-05	4.07e-06	1.89e-05	4.81e-06	1.78e-05	0.23949	0.37188	-0.548026
K03264	4.96e-06	1.32e-05	9.1e-06	8.52e-06	4.55e-06	8.55e-06	1e-05	1.63e-05	7.3e-06	9.37e-06	1.48e-05	1.7e-05	4.67e-06	1.82e-05	4.07e-06	1.89e-05	4.81e-06	1.78e-05	0.239485	0.37188	-0.604017
K02671	4.96e-06	0	0	0	0	0	0	0	3.65e-06	4.68e-06	0	5.67e-06	0	0	0	0	4.81e-06	5.92e-06	0.239367	0.37188	-0.203275
K11533	4.96e-06	0	0	0	0	0	0	0	3.65e-06	4.68e-06	0	5.67e-06	0	0	0	0	4.81e-06	5.92e-06	0.239367	0.37188	-0.203275
K20814	4.96e-06	0	0	0	0	0	0	0	3.65e-06	4.68e-06	0	5.67e-06	0	0	0	0	4.81e-06	5.92e-06	0.239367	0.37188	-0.203275
K22311	4.96e-06	0	0	0	0	0	0	0	3.65e-06	4.68e-06	0	5.67e-06	0	0	0	0	4.81e-06	5.92e-06	0.239367	0.37188	-0.203275
K01684	6.45e-05	0.000105788	9.56e-05	9.8e-05	0.000150195	0.000102658	0.000103421	0.00010879	0.000124052	9.83e-05	7.89e-05	0.00011345	0.000144814	0.000109291	0.000146637	0.000119754	0.000187523	0.000100639	0.23929	0.37188	-1.19802
K06331	9.92e-06	3.31e-06	1.37e-05	2.56e-05	2.73e-05	2.14e-05	1e-05	2.72e-05	1.82e-05	4.68e-06	0	1.13e-05	2.8e-05	1.21e-05	2.85e-05	1.26e-05	9.62e-06	0	0.239256	0.37188	0.451555
K01925	0.000937314	0.000965312	0.000891996	0.000873136	0.00099675	0.00095386	0.000880746	0.000870322	0.000875663	0.000941214	0.000892355	0.000981343	0.000952968	0.000947188	0.000859456	0.00100846	0.000928001	0.000976788	0.239029	0.37188	-5.89506
K11902	4.96e-06	3.31e-06	4.55e-06	8.52e-06	9.1e-06	4.28e-06	0	0	3.65e-06	0	0	0	0	6.07e-06	4.07e-06	6.3e-06	0	5.92e-06	0.239015	0.37188	0.32432
K16264	8.93e-05	7.27e-05	7.74e-05	4.26e-05	3.19e-05	5.56e-05	6.34e-05	4.9e-05	7.66e-05	6.09e-05	3.94e-05	6.81e-05	4.2e-05	6.07e-05	2.04e-05	6.93e-05	2.88e-05	7.1e-05	0.237946	0.370702	0.893894
K10896	4.96e-06	1.32e-05	4.55e-06	4.26e-06	4.55e-06	4.28e-06	6.67e-06	1.09e-05	7.3e-06	4.68e-06	9.86e-06	1.7e-05	4.67e-06	1.21e-05	4.07e-06	1.26e-05	4.81e-06	1.18e-05	0.237839	0.370653	-0.584201
K03748	4.46e-05	2.31e-05	4.1e-05	3.41e-05	3.64e-05	3.85e-05	3e-05	2.72e-05	3.28e-05	1.4e-05	1.97e-05	1.7e-05	4.2e-05	4.25e-05	2.44e-05	5.04e-05	1.92e-05	2.37e-05	0.237471	0.370198	0.880166
K22043	0	9.92e-06	9.1e-06	4.26e-06	1.37e-05	1.28e-05	6.67e-06	1.09e-05	7.3e-06	4.68e-06	9.86e-06	5.67e-06	9.34e-06	0	0	0	9.62e-06	1.18e-05	0.2368	0.369268	0.457675
K06970	0	3.31e-06	9.1e-06	0	0	0	0	0	0	0	4.93e-06	5.67e-06	0	1.21e-05	0	0	0	1.18e-05	0.236326	0.368647	-0.183565
K18888	0	0	0	0	4.55e-06	0	0	0	0	0	0	0	4.67e-06	0	4.07e-06	0	9.62e-06	0	0.236102	0.368415	-0.143531
K01051	0.000203333	0.000175211	0.000172938	0.00015759	0.000209363	0.000188206	0.000180153	0.000239339	0.000175133	0.000107701	0.000157764	0.000170175	0.000186857	0.000182152	0.000256615	0.000189086	0.000115399	0.000147998	0.2361	0.368415	1.48339
K03573	4.46e-05	9.92e-06	2.73e-05	8.52e-06	4.55e-06	2.14e-05	2.34e-05	2.18e-05	2.55e-05	9.37e-06	9.86e-06	2.27e-05	1.87e-05	1.82e-05	1.63e-05	2.52e-05	9.62e-06	5.92e-06	0.235762	0.36812	0.547193
K18903	0	0	9.1e-06	0	0	0	0	5.44e-06	7.3e-06	0	0	0	0	6.07e-06	0	0	0	0	0.235446	0.367743	0.153534
K01239	3.97e-05	3.97e-05	5.46e-05	3.83e-05	3.19e-05	4.71e-05	5.34e-05	4.9e-05	4.74e-05	1.87e-05	1.97e-05	3.97e-05	4.67e-05	6.07e-05	3.67e-05	4.41e-05	4.33e-05	3.55e-05	0.235353	0.367715	1.1564
K03657	0.00143325	0.00135871	0.00127883	0.0014609	0.0016749	0.00138588	0.00141453	0.00128373	0.00144849	0.00131114	0.00134593	0.00138409	0.00134537	0.00139649	0.00142564	0.00130469	0.00125977	0.00146814	0.234993	0.36727	4.36008
K06863	9.92e-06	1.65e-05	1.37e-05	8.52e-06	9.1e-06	1.28e-05	1.33e-05	2.18e-05	1.46e-05	9.37e-06	1.97e-05	2.27e-05	9.34e-06	2.43e-05	8.15e-06	2.52e-05	9.62e-06	2.37e-05	0.234822	0.367121	-0.743855
K11074	4.96e-06	3.31e-06	9.1e-06	8.52e-06	4.55e-06	8.55e-06	0	5.44e-06	0	0	0	5.67e-06	0	6.07e-06	8.15e-06	6.3e-06	0	0	0.234683	0.367021	0.336923
K06982	4.96e-06	9.92e-06	4.55e-06	4.26e-06	4.55e-06	8.55e-06	1e-05	1.09e-05	7.3e-06	4.68e-06	9.86e-06	1.7e-05	4.67e-06	1.21e-05	4.07e-06	1.26e-05	4.81e-06	1.78e-05	0.234654	0.367021	-0.587583
K01933	0.000763737	0.000740513	0.000723609	0.000762396	0.00076463	0.00082126	0.000723946	0.000815927	0.000715125	0.00066962	0.000680359	0.000686373	0.000822169	0.000625387	0.00085131	0.000680709	0.000831835	0.000615672	0.234401	0.366814	3.14992
K04066	0.00081829	0.000809936	0.000800976	0.000800729	0.000846555	0.000829815	0.000767316	0.000761532	0.000751611	0.000838195	0.000828264	0.000828186	0.00085954	0.000801467	0.000773918	0.00081307	0.000750094	0.000893909	0.234333	0.366814	-6.35382
K15910	0	0	0	4.26e-06	4.55e-06	0	0	0	0	4.68e-06	0	0	0	6.07e-06	0	6.3e-06	4.81e-06	0	0.233424	0.365519	-0.205572
K06968	1.49e-05	2.31e-05	2.28e-05	2.13e-05	1.37e-05	8.55e-06	2.67e-05	2.18e-05	2.55e-05	1.4e-05	3.45e-05	2.84e-05	1.4e-05	4.86e-05	8.15e-06	5.04e-05	9.62e-06	3.55e-05	0.233314	0.365463	-0.569069
K02863	0.00109105	0.00110085	0.000987567	0.0010648	0.00111964	0.00107363	0.00107424	0.00103351	0.00117485	0.00109574	0.00119309	0.00108345	0.0011118	0.00117791	0.00103053	0.00111561	0.00100974	0.0012491	0.233191	0.365388	-4.9948
K06993	0.000138861	0.000132234	9.56e-05	0.000149072	0.000154747	0.000188206	0.000140119	0.000146867	0.000138647	0.000112384	7.89e-05	8.51e-05	0.000163499	8.5e-05	0.000219956	9.45e-05	0.000163482	7.1e-05	0.233092	0.365349	0.981089
K10800	0	0	4.55e-06	4.26e-06	4.55e-06	0	3.34e-06	0	3.65e-06	0	4.93e-06	5.67e-06	0	6.07e-06	0	6.3e-06	4.81e-06	5.92e-06	0.232788	0.36499	-0.355062
K04782	0	0	0	4.26e-06	4.55e-06	4.28e-06	6.67e-06	0	7.3e-06	0	0	0	4.67e-06	1.82e-05	4.07e-06	1.89e-05	4.81e-06	5.92e-06	0.23267	0.364921	-0.248652
K05349	0.00164154	0.00134879	0.00142901	0.00166535	0.00161119	0.00148853	0.0014579	0.00164817	0.00146309	0.00128305	0.00131635	0.00131602	0.00169105	0.0012022	0.00189406	0.00117864	0.00165405	0.00112479	0.232586	0.364907	2.12038
K02979	4.96e-06	9.92e-06	9.1e-06	4.26e-06	9.1e-06	8.55e-06	1.33e-05	1.09e-05	1.09e-05	4.68e-06	9.86e-06	2.27e-05	9.34e-06	1.21e-05	4.07e-06	1.89e-05	4.81e-06	2.96e-05	0.232549	0.364907	-0.493237
K01589	1.49e-05	1.32e-05	1.37e-05	1.28e-05	2.28e-05	1.71e-05	1.67e-05	2.18e-05	7.3e-06	4.68e-06	4.93e-06	1.13e-05	1.4e-05	2.43e-05	1.22e-05	1.26e-05	9.62e-06	1.78e-05	0.231106	0.362817	0.769955
K04755	9.92e-06	1.65e-05	9.1e-06	2.13e-05	9.1e-06	8.55e-06	1e-05	1.09e-05	7.3e-06	4.68e-06	4.93e-06	5.67e-06	9.34e-06	1.82e-05	8.15e-06	1.26e-05	9.62e-06	5.92e-06	0.230949	0.362688	0.681751
K00135	1.98e-05	1.32e-05	2.28e-05	1.7e-05	1.82e-05	1.71e-05	1e-05	5.44e-06	1.82e-05	1.4e-05	1.97e-05	1.7e-05	9.34e-06	3.04e-05	1.63e-05	3.15e-05	1.92e-05	1.78e-05	0.23091	0.362688	-0.836204
K01069	3.47e-05	1.98e-05	2.28e-05	2.13e-05	1.82e-05	1.28e-05	1.67e-05	1.09e-05	2.55e-05	2.34e-05	1.48e-05	1.13e-05	1.87e-05	3.04e-05	8.15e-06	1.26e-05	1.44e-05	1.18e-05	0.23063	0.362419	0.78175
K06917	0	6.61e-06	0	4.26e-06	0	0	6.67e-06	1.63e-05	3.65e-06	9.37e-06	0	5.67e-06	9.34e-06	6.07e-06	8.15e-06	6.3e-06	9.62e-06	5.92e-06	0.230297	0.362012	-0.378048
K00886	9.92e-06	6.61e-06	1.37e-05	0	0	4.28e-06	3.34e-06	5.44e-06	1.09e-05	4.68e-06	0	5.67e-06	0	6.07e-06	0	6.3e-06	4.81e-06	5.92e-06	0.230292	0.362012	0.374384
K15895	0	3.31e-06	4.55e-06	0	0	0	0	0	0	4.68e-06	0	0	0	0	4.07e-06	6.3e-06	4.81e-06	0	0.230204	0.362012	-0.204735
K03547	0.000664551	0.000700843	0.000732711	0.000762396	0.000691808	0.000752822	0.000687249	0.000810487	0.000722422	0.000735177	0.000798683	0.00074877	0.000742755	0.000692176	0.000900189	0.000636589	0.000783752	0.00081695	0.230186	0.362012	-3.5966
K07777	3.97e-05	4.63e-05	5.92e-05	5.54e-05	6.83e-05	0.00011549	6.67e-05	6.53e-05	8.03e-05	4.21e-05	6.9e-05	5.11e-05	5.61e-05	3.64e-05	8.96e-05	3.78e-05	5.77e-05	5.33e-05	0.230019	0.362012	0.933111
K17250	4.96e-06	0	0	4.26e-06	4.55e-06	0	0	0	3.65e-06	4.68e-06	0	0	4.67e-06	6.07e-06	4.07e-06	6.3e-06	4.81e-06	0	0.229591	0.361483	-0.323725
K11179	9.92e-06	1.32e-05	1.37e-05	0	0	4.28e-06	3.34e-06	2.18e-05	3.65e-06	9.37e-06	0	0	4.67e-06	0	1.22e-05	6.3e-06	4.81e-06	0	0.229104	0.360831	0.293411
K06152	0	6.61e-06	0	4.26e-06	4.55e-06	4.28e-06	3.34e-06	5.44e-06	3.65e-06	4.68e-06	4.93e-06	5.67e-06	0	1.21e-05	0	1.26e-05	4.81e-06	5.92e-06	0.229075	0.360831	-0.396992
K02790	9.92e-06	1.32e-05	1.82e-05	1.28e-05	2.28e-05	1.28e-05	1e-05	0	7.3e-06	4.68e-06	0	5.67e-06	9.34e-06	6.07e-06	2.44e-05	6.3e-06	9.62e-06	5.92e-06	0.229018	0.360831	0.455276
K02791	9.92e-06	1.32e-05	1.82e-05	1.28e-05	2.28e-05	1.28e-05	1e-05	0	7.3e-06	4.68e-06	0	5.67e-06	9.34e-06	6.07e-06	2.44e-05	6.3e-06	9.62e-06	5.92e-06	0.229018	0.360831	0.455276
K14205	0	1.32e-05	4.55e-06	4.26e-06	2.28e-05	8.55e-06	3.34e-06	0	7.3e-06	4.68e-06	0	5.67e-06	0	0	0	0	9.62e-06	1.18e-05	0.228562	0.360441	0.265138
K09692	0.000203333	0.000178517	0.000150183	0.000229997	0.00023212	0.000248089	0.000206842	0.00022846	0.000200673	0.000154528	0.000128184	0.000175848	0.000191528	0.000109291	0.00033808	0.000119754	0.000240415	0.000118399	0.228241	0.360052	1.02129
K01735	0.000848046	0.000846301	0.00086469	0.000856099	0.000810144	0.00083837	0.000830703	0.000864883	0.000850123	0.000875657	0.000867705	0.000822513	0.000887568	0.000807539	0.000928702	0.000825675	0.000908767	0.000852469	0.227877	0.359593	-8.2322
K00856	0	6.61e-06	0	0	0	4.28e-06	0	5.44e-06	0	4.68e-06	0	0	4.67e-06	6.07e-06	8.15e-06	1.26e-05	0	0	0.227702	0.359432	-0.236947
K04795	4.96e-06	1.32e-05	1.37e-05	4.26e-06	9.1e-06	1.28e-05	1e-05	1.09e-05	1.09e-05	1.4e-05	9.86e-06	1.13e-05	4.67e-06	1.82e-05	4.07e-06	1.26e-05	1.92e-05	2.37e-05	0.227492	0.359217	-0.669153
K02111	0.000600079	0.000604973	0.000568875	0.000664435	0.000673603	0.000615945	0.000570483	0.000630983	0.000620261	0.000543188	0.000547246	0.000578595	0.000611955	0.000588957	0.0007006	0.000617681	0.000615462	0.000467674	0.227216	0.358897	3.48888
K10831	4.96e-06	6.61e-06	0	0	9.1e-06	0	6.67e-06	5.44e-06	7.3e-06	4.68e-06	0	0	4.67e-06	0	8.15e-06	0	4.81e-06	0	0.227178	0.358897	0.31506
K04752	9.92e-06	1.98e-05	3.19e-05	1.7e-05	1.37e-05	4.28e-06	2.34e-05	1.63e-05	2.92e-05	9.37e-06	9.86e-06	5.67e-06	1.4e-05	2.43e-05	1.22e-05	3.15e-05	4.81e-06	5.92e-06	0.227129	0.358897	0.530856
K00010	8.43e-05	8.26e-05	0.000131979	6.81e-05	4.1e-05	6.42e-05	8.34e-05	8.16e-05	5.11e-05	6.56e-05	0.000103533	0.000107778	8.88e-05	9.71e-05	0.000114051	5.67e-05	7.69e-05	0.000100639	0.227023	0.358897	-1.09617
K02244	1.49e-05	3.31e-06	4.55e-06	4.26e-06	9.1e-06	4.28e-06	3.34e-06	5.44e-06	7.3e-06	0	0	0	1.4e-05	0	8.15e-06	0	4.81e-06	5.92e-06	0.226578	0.358352	0.340618
K21011	2.98e-05	2.31e-05	3.64e-05	5.11e-05	8.19e-05	7.27e-05	3.34e-05	3.81e-05	4.74e-05	1.87e-05	1.97e-05	4.54e-05	6.07e-05	1.82e-05	6.92e-05	2.52e-05	2.88e-05	2.37e-05	0.226402	0.358189	0.62446
K16317	4.96e-06	6.61e-06	4.55e-06	4.26e-06	4.55e-06	4.28e-06	6.67e-06	1.09e-05	7.3e-06	4.68e-06	9.86e-06	5.67e-06	4.67e-06	1.21e-05	4.07e-06	1.26e-05	4.81e-06	1.18e-05	0.225604	0.357042	-0.694075
K21345	4.96e-06	3.31e-06	4.55e-06	8.52e-06	4.55e-06	4.28e-06	3.34e-06	5.44e-06	3.65e-06	4.68e-06	9.86e-06	0	9.34e-06	1.21e-05	8.15e-06	1.26e-05	4.81e-06	0	0.225457	0.356925	-0.496906
K01601	4.96e-06	6.61e-06	4.55e-06	4.26e-06	4.55e-06	4.28e-06	6.67e-06	1.09e-05	7.3e-06	4.68e-06	9.86e-06	1.13e-05	4.67e-06	1.21e-05	4.07e-06	1.26e-05	4.81e-06	5.92e-06	0.225191	0.35662	-0.704744
K06869	4.96e-06	6.61e-06	4.55e-06	4.26e-06	4.55e-06	4.28e-06	6.67e-06	1.09e-05	7.3e-06	4.68e-06	9.86e-06	1.13e-05	4.67e-06	1.21e-05	4.07e-06	1.26e-05	4.81e-06	5.92e-06	0.225191	0.35662	-0.704744
K11624	4.96e-06	3.31e-06	4.55e-06	4.26e-06	4.55e-06	4.28e-06	3.34e-06	0	3.65e-06	4.68e-06	0	5.67e-06	4.67e-06	0	0	0	0	5.92e-06	0.22501	0.356563	0.407575
K03152	0.000808371	0.00076696	0.000755466	0.000787952	0.000773733	0.000851202	0.00076398	0.000788729	0.000791745	0.000725812	0.000754311	0.00065801	0.000845526	0.000637531	0.000949068	0.000642892	0.000802985	0.000645272	0.224849	0.356424	2.91914
K20976	2.98e-05	3.97e-05	4.1e-05	5.11e-05	3.64e-05	3.85e-05	4e-05	3.26e-05	2.92e-05	5.15e-05	2.47e-05	1.13e-05	3.27e-05	6.07e-06	3.26e-05	1.26e-05	7.21e-05	5.92e-06	0.224815	0.356424	0.599712
K22213	0	6.61e-06	0	8.52e-06	0	0	6.67e-06	0	3.65e-06	4.68e-06	4.93e-06	5.67e-06	1.4e-05	6.07e-06	1.63e-05	0	0	0	0.22474	0.356424	-0.266728
K03588	0.00111089	0.00115705	0.00112865	0.00109887	0.00118336	0.00112496	0.00108759	0.00107158	0.0010508	0.00112852	0.00113393	0.0011345	0.00119121	0.00108077	0.00112829	0.00118494	0.00114437	0.00109519	0.224319	0.355929	-8.8342
K09954	4.96e-06	3.31e-06	9.1e-06	8.52e-06	4.55e-06	8.55e-06	3.34e-06	5.44e-06	3.65e-06	4.68e-06	4.93e-06	5.67e-06	0	6.07e-06	0	6.3e-06	4.81e-06	5.92e-06	0.223998	0.355535	0.626095
K22078	0	0	4.55e-06	0	0	0	0	0	0	0	4.93e-06	5.67e-06	0	0	0	0	0	5.92e-06	0.223957	0.355535	-0.16006
K00042	4.46e-05	3.97e-05	3.19e-05	3.83e-05	4.1e-05	3.85e-05	5.67e-05	4.35e-05	5.47e-05	6.09e-05	3.45e-05	5.11e-05	5.61e-05	3.64e-05	5.7e-05	3.15e-05	6.25e-05	5.33e-05	0.223907	0.355535	-1.39134
K18779	4.96e-06	9.92e-06	4.55e-06	4.26e-06	4.55e-06	4.28e-06	1e-05	1.09e-05	7.3e-06	4.68e-06	9.86e-06	1.13e-05	4.67e-06	1.21e-05	4.07e-06	1.26e-05	4.81e-06	1.78e-05	0.223628	0.355294	-0.613381
K07257	1.98e-05	1.98e-05	2.28e-05	2.13e-05	2.28e-05	1.28e-05	2.67e-05	3.26e-05	3.28e-05	1.4e-05	9.86e-06	1.13e-05	2.34e-05	3.04e-05	2.44e-05	2.52e-05	1.92e-05	1.78e-05	0.223252	0.354812	0.984627
K00972	0.000208292	0.000195046	0.000159285	0.000208701	0.000336801	0.000303695	0.000210178	0.000179504	0.000197024	0.000224768	0.000221856	0.00020421	0.000196199	0.000145721	0.000207736	0.000144966	0.000182715	0.000219037	0.223182	0.354812	1.35961
K07712	1.49e-05	9.92e-06	1.82e-05	1.28e-05	1.37e-05	2.14e-05	3.34e-06	1.63e-05	7.3e-06	9.37e-06	4.93e-06	5.67e-06	1.4e-05	1.21e-05	1.63e-05	1.89e-05	4.81e-06	0	0.222491	0.353832	0.587061
K05342	0	1.32e-05	1.37e-05	4.26e-06	4.55e-06	0	6.67e-06	1.63e-05	3.65e-06	1.4e-05	9.86e-06	1.13e-05	4.67e-06	1.21e-05	8.15e-06	1.26e-05	9.62e-06	5.92e-06	0.222456	0.353832	-0.532042
K05979	2.98e-05	6.94e-05	3.64e-05	3.83e-05	2.73e-05	2.57e-05	5.34e-05	3.26e-05	3.28e-05	3.75e-05	4.44e-05	5.11e-05	3.27e-05	6.68e-05	3.26e-05	6.3e-05	3.37e-05	5.92e-05	0.221369	0.352276	-0.935781
K01071	0.000233089	0.000198352	0.000213897	0.00021296	0.000236671	0.000226702	0.000190161	0.000146867	0.000211619	0.00021072	0.000187345	0.00018152	0.000238242	0.000200367	0.000183296	0.000157572	0.000192332	0.000183518	0.220834	0.351538	2.45243
K03471	0.000138861	0.000128929	0.000127428	0.00010648	0.000104682	8.55e-05	0.000120102	8.16e-05	0.000142295	7.96e-05	9.37e-05	0.000119123	8.88e-05	0.000109291	5.3e-05	0.000151269	6.25e-05	0.000130238	0.220385	0.350939	1.19638
K21023	0	0	0	0	4.55e-06	0	0	0	0	4.68e-06	0	0	0	0	0	6.3e-06	0	5.92e-06	0.220269	0.350869	-0.160352
K00031	0.000277723	0.000403315	0.000345876	0.000362032	0.00033225	0.000316527	0.000323607	0.000440601	0.000372157	0.000407391	0.00035497	0.000414093	0.000336342	0.000333945	0.000435838	0.000359263	0.000437555	0.000343356	0.220208	0.350869	-2.44988
K18554	4.96e-06	9.92e-06	4.55e-06	8.52e-06	0	0	3.34e-06	1.09e-05	7.3e-06	0	9.86e-06	1.13e-05	4.67e-06	6.07e-06	8.15e-06	6.3e-06	9.62e-06	1.78e-05	0.220145	0.350869	-0.468931
K19997	4.96e-05	3.31e-05	5.01e-05	2.56e-05	4.55e-05	3.85e-05	4.34e-05	4.35e-05	3.65e-05	1.4e-05	3.94e-05	2.27e-05	3.74e-05	3.64e-05	4.89e-05	5.67e-05	1.92e-05	2.96e-05	0.220022	0.350817	1.00698
K15358	0	0	4.55e-06	4.26e-06	0	4.28e-06	3.34e-06	0	7.3e-06	1.87e-05	1.48e-05	0	4.67e-06	6.07e-06	8.15e-06	0	0	0	0.219899	0.350735	-0.245584
K03480	6.45e-05	4.3e-05	5.46e-05	3.41e-05	4.1e-05	5.13e-05	3.34e-05	7.07e-05	4.74e-05	3.28e-05	1.97e-05	2.27e-05	6.54e-05	1.21e-05	5.3e-05	1.89e-05	8.17e-05	2.96e-05	0.219531	0.350262	0.690228
K03578	2.98e-05	2.31e-05	2.73e-05	2.13e-05	9.1e-06	4.28e-06	2.67e-05	2.18e-05	2.55e-05	1.4e-05	3.94e-05	2.84e-05	9.34e-06	5.46e-05	1.22e-05	3.78e-05	2.4e-05	3.55e-05	0.219315	0.350032	-0.620324
K00207	0	0	4.55e-06	0	0	0	0	0	0	4.68e-06	0	0	0	0	0	0	4.81e-06	1.18e-05	0.219204	0.349969	-0.14314
K00364	2.98e-05	6.61e-06	1.82e-05	1.28e-05	1.82e-05	1.28e-05	2e-05	0	2.19e-05	1.87e-05	1.48e-05	1.13e-05	1.4e-05	3.04e-05	1.22e-05	3.15e-05	2.4e-05	2.96e-05	0.219115	0.349941	-0.656343
K02991	4.96e-06	9.92e-06	4.55e-06	4.26e-06	9.1e-06	8.55e-06	1.33e-05	1.09e-05	1.09e-05	9.37e-06	9.86e-06	2.84e-05	4.67e-06	1.82e-05	4.07e-06	1.26e-05	4.81e-06	1.78e-05	0.219101	0.349941	-0.518165
K00899	4.96e-06	2.98e-05	2.28e-05	8.52e-06	9.1e-06	8.55e-06	1.33e-05	0	2.55e-05	2.34e-05	4.93e-06	2.84e-05	1.87e-05	6.07e-06	3.26e-05	1.89e-05	1.44e-05	2.96e-05	0.21848	0.349155	-0.511453
K12240	0	0	4.55e-06	0	0	0	0	0	0	0	0	0	4.67e-06	6.07e-06	0	6.3e-06	0	0	0.218399	0.349139	-0.160827
K19092	9.92e-06	9.92e-06	1.82e-05	8.52e-06	1.37e-05	2.99e-05	2.34e-05	1.63e-05	3.28e-05	1.4e-05	9.86e-06	1.7e-05	1.4e-05	1.82e-05	4.07e-06	1.89e-05	9.62e-06	1.78e-05	0.217954	0.348541	0.680148
K01486	0.000138861	0.000148764	0.000168387	0.000153331	0.00013199	0.000149709	0.000186825	0.000184943	0.000171484	0.000173258	0.000167625	0.000238245	0.000168171	0.000194295	0.000105905	0.000201692	0.000144249	0.000207197	0.217453	0.347854	-1.70416
K15461	4.96e-06	3.31e-06	4.55e-06	8.52e-06	9.1e-06	4.28e-06	3.34e-06	5.44e-06	7.3e-06	4.68e-06	0	0	4.67e-06	6.07e-06	4.07e-06	6.3e-06	9.62e-06	0	0.216765	0.346867	0.524714
K02494	4.96e-06	3.31e-06	9.1e-06	4.26e-06	4.55e-06	4.28e-06	3.34e-06	5.44e-06	3.65e-06	4.68e-06	0	0	4.67e-06	6.07e-06	4.07e-06	6.3e-06	4.81e-06	0	0.216572	0.346671	0.560567
K02883	4.96e-06	6.61e-06	9.1e-06	4.26e-06	4.55e-06	8.55e-06	1e-05	1.09e-05	1.09e-05	4.68e-06	9.86e-06	1.7e-05	9.34e-06	1.21e-05	4.07e-06	1.26e-05	4.81e-06	1.78e-05	0.216551	0.346671	-0.67751
K19220	0	0	0	0	0	4.28e-06	0	0	0	0	0	0	0	6.07e-06	4.07e-06	6.3e-06	0	0	0.216404	0.346629	-0.159849
K13770	0	0	0	0	0	0	3.34e-06	5.44e-06	0	9.37e-06	4.93e-06	0	0	6.07e-06	4.07e-06	0	0	0	0.21594	0.345998	-0.199387
K00963	0.000233089	0.000304139	0.000282162	0.000276848	0.000236671	0.000226702	0.000313599	0.000271976	0.000284591	0.000248181	0.000246507	0.00029497	0.000242913	0.000285371	0.00017515	0.000283629	0.000177907	0.000266397	0.215331	0.345137	2.09933
K09946	7.93e-05	0.00013554	0.000113775	9.8e-05	8.19e-05	6.42e-05	0.000123438	5.98e-05	0.000131349	0.000126432	0.000128184	0.000124795	8.88e-05	0.000133578	0.000101831	8.19e-05	9.14e-05	0.000159838	0.214678	0.344201	-1.21637
K03442	0.000585201	0.000595055	0.000514263	0.000600547	0.000573473	0.000586003	0.000577155	0.000549391	0.000525398	0.00051041	0.000557106	0.00054456	0.00056057	0.000473594	0.000655794	0.000504229	0.000524104	0.000544633	0.214668	0.344201	4.07427
K17237	0	6.61e-06	4.55e-06	0	0	0	0	0	0	4.68e-06	4.93e-06	0	0	6.07e-06	4.07e-06	0	0	5.92e-06	0.214493	0.344131	-0.240009
K10844	9.92e-06	1.98e-05	1.37e-05	8.52e-06	9.1e-06	2.14e-05	1.33e-05	3.26e-05	2.19e-05	9.37e-06	1.97e-05	1.7e-05	1.4e-05	4.25e-05	8.15e-06	5.04e-05	2.4e-05	2.96e-05	0.213909	0.343307	-0.536495
K01682	4.96e-06	3.31e-06	1.37e-05	8.52e-06	9.1e-06	4.28e-06	1e-05	0	3.65e-06	9.37e-06	0	0	0	6.07e-06	4.07e-06	6.3e-06	4.81e-06	5.92e-06	0.213786	0.343222	0.425174
K03711	0.000719103	0.00061489	0.000668997	0.000664435	0.000705463	0.000731435	0.000650551	0.000728895	0.000645802	0.000632159	0.000621198	0.000584268	0.000677355	0.000661817	0.000786138	0.000630287	0.000687586	0.000520954	0.213586	0.343013	3.45459
K07403	4.46e-05	3.64e-05	2.73e-05	2.56e-05	4.1e-05	3.42e-05	2e-05	3.81e-05	2.19e-05	2.81e-05	2.96e-05	2.84e-05	5.14e-05	4.86e-05	3.67e-05	5.67e-05	4.33e-05	2.37e-05	0.213459	0.342922	-1.05155
K19126	2.98e-05	3.31e-05	1.82e-05	1.7e-05	4.1e-05	4.28e-05	2e-05	3.81e-05	2.19e-05	3.75e-05	3.45e-05	3.97e-05	1.87e-05	3.04e-05	2.44e-05	4.41e-05	3.85e-05	4.74e-05	0.213333	0.342831	-1.02875
K08281	2.98e-05	4.96e-05	3.64e-05	3.83e-05	4.1e-05	4.28e-05	4.34e-05	4.35e-05	4.74e-05	4.21e-05	4.44e-05	2.84e-05	2.8e-05	4.25e-05	2.44e-05	4.41e-05	3.85e-05	4.14e-05	0.213148	0.342647	1.74821
K13993	0.000441381	0.00051902	0.000486957	0.000408883	0.000418726	0.000359301	0.000447045	0.00044604	0.000456075	0.000491679	0.000586687	0.000550233	0.000378384	0.000613244	0.000256615	0.000705921	0.00036543	0.000639352	0.212866	0.342305	-1.35063
K01308	0.000342194	0.000360339	0.000309468	0.000362032	0.000341353	0.000359301	0.000296918	0.000277415	0.000277293	0.00038866	0.000409202	0.00029497	0.000341013	0.000303586	0.000329934	0.000283629	0.00042313	0.000402555	0.212425	0.34171	-2.32483
K19575	0	3.31e-06	0	0	9.1e-06	0	6.67e-06	0	1.09e-05	0	0	5.67e-06	0	0	0	0	4.81e-06	0	0.212322	0.341656	0.197971
K05739	0	9.92e-06	0	8.52e-06	0	8.55e-06	3.34e-06	5.44e-06	3.65e-06	4.68e-06	9.86e-06	5.67e-06	4.67e-06	1.82e-05	1.22e-05	1.26e-05	0	0	0.211734	0.340822	-0.360609
K09124	2.48e-05	3.31e-05	1.82e-05	3.41e-05	2.73e-05	3.85e-05	2e-05	2.72e-05	2.19e-05	2.34e-05	1.48e-05	1.7e-05	2.8e-05	3.04e-05	2.04e-05	3.15e-05	2.88e-05	1.18e-05	0.211463	0.340497	1.10781
K07058	0.000614957	0.000568608	0.000641691	0.000604806	0.000568921	0.000577449	0.000573819	0.000609225	0.000569181	0.000646207	0.000571896	0.000578595	0.000621298	0.000582885	0.000639501	0.000592469	0.00064912	0.000603833	0.211462	0.340497	-6.58963
K03409	5.46e-05	4.96e-05	5.92e-05	5.11e-05	6.83e-05	7.7e-05	7.01e-05	7.07e-05	7.3e-05	4.21e-05	4.93e-05	5.67e-05	4.2e-05	7.89e-05	8.15e-05	6.93e-05	3.85e-05	3.55e-05	0.21116	0.340233	1.28243
K20532	1.98e-05	2.31e-05	4.1e-05	1.7e-05	2.28e-05	3.85e-05	3e-05	3.81e-05	1.82e-05	1.4e-05	2.96e-05	2.27e-05	9.34e-06	3.64e-05	1.63e-05	3.78e-05	1.44e-05	1.18e-05	0.210784	0.339739	0.753777
K19429	9.92e-06	3.31e-06	1.37e-05	8.52e-06	0	4.28e-06	1e-05	1.09e-05	1.09e-05	4.68e-06	9.86e-06	0	9.34e-06	6.07e-06	8.15e-06	6.3e-06	4.81e-06	0	0.210712	0.339735	0.519609
K03779	5.46e-05	6.28e-05	5.01e-05	8.94e-05	6.37e-05	5.56e-05	5.67e-05	6.53e-05	5.84e-05	6.56e-05	2.96e-05	5.67e-05	7.01e-05	3.04e-05	7.74e-05	1.89e-05	6.73e-05	4.74e-05	0.210648	0.339735	1.05152
K00560	0.000634795	0.000694231	0.000714507	0.000596288	0.000691808	0.000701493	0.000727282	0.000641862	0.000660396	0.000622793	0.000635988	0.000606958	0.000742755	0.000582885	0.000623208	0.000573561	0.000726052	0.000663032	0.21063	0.339735	3.98579
K16199	9.92e-06	6.61e-06	4.55e-06	0	0	8.55e-06	6.67e-06	1.63e-05	3.65e-06	9.37e-06	4.93e-06	1.13e-05	4.67e-06	1.82e-05	1.22e-05	6.3e-06	9.62e-06	5.92e-06	0.210617	0.339735	-0.507763
K03336	5.46e-05	2.98e-05	3.64e-05	2.98e-05	2.73e-05	2.99e-05	3e-05	4.9e-05	1.82e-05	3.28e-05	4.44e-05	3.97e-05	4.2e-05	3.64e-05	5.7e-05	4.41e-05	3.37e-05	2.96e-05	0.210047	0.339109	-1.17047
K06423	5.46e-05	2.98e-05	2.73e-05	5.54e-05	7.74e-05	8.98e-05	4e-05	0	4.38e-05	5.15e-05	3.45e-05	2.84e-05	5.14e-05	2.43e-05	1.22e-05	2.52e-05	2.4e-05	4.74e-05	0.209736	0.338719	0.580134
K02759	8.93e-05	6.94e-05	5.46e-05	5.54e-05	7.28e-05	6.42e-05	5e-05	8.16e-05	6.2e-05	4.21e-05	1.97e-05	1.7e-05	8.41e-05	7.29e-05	9.78e-05	5.04e-05	6.25e-05	2.96e-05	0.209656	0.338702	0.842148
K03555	0.000793493	0.000800019	0.000746364	0.000702768	0.000810144	0.000757099	0.000753972	0.000707137	0.000726071	0.000838195	0.000793753	0.000765788	0.000784797	0.000783252	0.000741332	0.000743738	0.000716436	0.000887989	0.209537	0.338621	-5.17834
K06894	4.96e-05	4.3e-05	5.46e-05	3.83e-05	4.1e-05	2.99e-05	5.34e-05	5.44e-05	2.19e-05	4.68e-05	3.45e-05	6.24e-05	3.74e-05	7.89e-05	2.44e-05	7.56e-05	4.81e-05	6.51e-05	0.209259	0.338283	-0.953402
K01400	0	3.31e-06	0	8.52e-06	9.1e-06	0	1.33e-05	0	0	0	0	5.67e-06	0	0	0	0	0	5.92e-06	0.208556	0.337259	0.196156
K09735	4.96e-06	9.92e-06	4.55e-06	4.26e-06	4.55e-06	8.55e-06	1.33e-05	1.09e-05	7.3e-06	9.37e-06	9.86e-06	1.7e-05	4.67e-06	1.21e-05	4.07e-06	1.26e-05	4.81e-06	1.78e-05	0.208504	0.337259	-0.648859
K07028	9.92e-06	6.61e-06	0	8.52e-06	9.1e-06	8.55e-06	1e-05	0	1.46e-05	4.68e-06	4.93e-06	0	0	6.07e-06	0	1.26e-05	0	1.18e-05	0.208293	0.337055	0.382768
K11906	0	3.31e-06	4.55e-06	0	0	0	0	0	0	4.68e-06	0	0	4.67e-06	0	4.07e-06	0	9.62e-06	0	0.207376	0.335683	-0.198267
K01950	0.000629835	0.000598361	0.000628038	0.000600547	0.000605332	0.000598836	0.000640542	0.000685379	0.000605667	0.000590015	0.000571896	0.000595613	0.000579255	0.000595028	0.000655794	0.000567258	0.000692394	0.000509114	0.207185	0.335485	4.51913
K00938	0	0	4.55e-06	0	4.55e-06	0	0	5.44e-06	0	4.68e-06	4.93e-06	1.13e-05	0	6.07e-06	0	0	0	5.92e-06	0.206737	0.33487	-0.252345
K11910	0	3.31e-06	4.55e-06	0	0	0	0	0	0	4.68e-06	0	0	0	6.07e-06	4.07e-06	6.3e-06	0	0	0.206694	0.33487	-0.21348
K01181	7.44e-05	0.000105788	6.83e-05	0.000127776	0.00010013	0.00011549	0.000100085	4.9e-05	0.000109458	3.75e-05	7.4e-05	7.94e-05	9.34e-05	8.5e-05	0.000122198	9.45e-05	6.73e-05	5.92e-05	0.206363	0.334486	1.10837
K09935	0.000143821	0.000148764	0.000154734	0.000127776	0.000168401	0.000136877	0.000140119	7.62e-05	0.000134998	0.000149845	6.41e-05	0.000107778	7.94e-05	0.000157865	8.96e-05	0.000144966	0.000139441	0.000130238	0.206149	0.33425	1.33374
K11904	4.96e-06	3.31e-06	0	0	0	4.28e-06	0	0	0	4.68e-06	0	5.67e-06	0	6.07e-06	4.07e-06	6.3e-06	0	0	0.206105	0.33425	-0.270517
K04517	0.000486015	0.000561996	0.000514263	0.000579251	0.000486997	0.000534675	0.000507096	0.000516754	0.000521749	0.000571284	0.000512735	0.000550233	0.000555898	0.000485738	0.000631354	0.000529441	0.00062027	0.000491354	0.205511	0.333436	-3.95797
K00133	0.000907558	0.000925641	0.000923853	0.000975356	0.000964891	0.000941028	0.000870737	0.000902959	0.000963229	0.00098804	0.000882495	0.000884911	0.000873554	0.000910758	0.000908336	0.000895007	0.000952042	0.000876149	0.205268	0.333152	7.97178
K00573	9.92e-06	2.31e-05	1.82e-05	1.7e-05	2.28e-05	8.55e-06	1.67e-05	2.18e-05	1.46e-05	1.87e-05	1.97e-05	1.7e-05	9.34e-06	4.25e-05	1.22e-05	4.41e-05	1.44e-05	2.96e-05	0.205176	0.333114	-0.645328
K09116	9.42e-05	0.000105788	0.000118326	0.000140554	0.00010013	0.000119767	0.000133446	9.25e-05	0.000149592	0.000112384	0.000123253	0.000119123	0.000112114	0.000151793	0.000118124	0.000157572	0.000134632	0.000130238	0.204991	0.332923	-2.07532
K08320	4.96e-06	0	0	4.26e-06	4.55e-06	4.28e-06	3.34e-06	0	3.65e-06	4.68e-06	4.93e-06	0	4.67e-06	1.21e-05	4.07e-06	6.3e-06	4.81e-06	0	0.20426	0.331846	-0.397825
K00949	0.000535608	0.000657866	0.000550671	0.000630361	0.000614435	0.000654442	0.000607181	0.000658181	0.000660396	0.000618111	0.000631058	0.000629648	0.000705383	0.000576813	0.000712819	0.000598772	0.000764519	0.000639352	0.203958	0.331466	-3.67965
K04654	2.98e-05	5.62e-05	5.92e-05	3.83e-05	4.55e-05	3.42e-05	6.01e-05	5.44e-05	4.01e-05	5.62e-05	4.44e-05	5.11e-05	7.47e-05	4.25e-05	4.89e-05	4.41e-05	5.29e-05	6.51e-05	0.203783	0.331291	-1.42934
K15912	0	0	0	4.26e-06	4.55e-06	0	0	0	3.65e-06	4.68e-06	0	0	4.67e-06	6.07e-06	0	6.3e-06	4.81e-06	0	0.203502	0.330944	-0.274326
K10914	7.93e-05	7.27e-05	8.19e-05	5.54e-05	4.55e-05	7.27e-05	5.67e-05	8.7e-05	6.57e-05	8.9e-05	7.89e-05	5.67e-05	9.34e-05	7.89e-05	9.37e-05	7.56e-05	7.69e-05	5.33e-05	0.203443	0.330944	-1.63573
K02876	0.00132414	0.0013554	0.00123787	0.00126072	0.00124252	0.00135166	0.00123771	0.00121845	0.00130985	0.00125964	0.00132621	0.00124228	0.001308	0.00123863	0.0011731	0.00121015	0.00123092	0.00126686	0.203399	0.330944	7.98953
K00867	4.96e-06	0	9.1e-06	0	4.55e-06	4.28e-06	3.34e-06	5.44e-06	0	0	0	0	0	0	0	0	0	1.18e-05	0.203362	0.330944	0.216698
K00564	0.000114065	0.00015207	0.000145632	0.000153331	0.000122887	8.98e-05	0.000120102	0.00010879	0.000109458	0.000112384	0.000187345	0.00020421	0.000102771	0.000218582	6.92e-05	0.000239509	6.73e-05	0.000195358	0.203125	0.330771	-0.888141
K19872	0	3.31e-06	0	0	0	4.28e-06	3.34e-06	0	3.65e-06	0	0	0	4.67e-06	0	0	0	0	0	0.202897	0.330509	0.192783
K06131	0.000704225	0.000809936	0.000732711	0.000719804	0.00079649	0.000744267	0.000730619	0.000832245	0.000784448	0.000721129	0.000769102	0.000737425	0.000775455	0.000661817	0.000798358	0.000617681	0.000750094	0.000734071	0.202856	0.330509	4.59956
K03685	0.00105138	0.0011273	0.00102853	0.00103498	0.00114239	0.00109501	0.00113429	0.000984552	0.00109823	0.00112852	0.00118816	0.00110614	0.00111647	0.00110505	0.00102646	0.0011093	0.00109629	0.00109519	0.202647	0.330322	-7.10782
K14128	4.96e-06	9.92e-06	4.55e-06	4.26e-06	4.55e-06	4.28e-06	1.33e-05	1.09e-05	7.3e-06	4.68e-06	9.86e-06	1.13e-05	4.67e-06	1.21e-05	4.07e-06	1.26e-05	9.62e-06	1.78e-05	0.2026	0.330322	-0.660362
K02099	7.44e-05	8.93e-05	5.92e-05	9.8e-05	5.01e-05	7.7e-05	0.000100085	4.35e-05	9.49e-05	9.37e-05	3.94e-05	5.67e-05	7.94e-05	3.64e-05	6.92e-05	6.3e-05	7.69e-05	5.92e-05	0.202077	0.329613	1.11488
K03388	0.000168617	0.000175211	0.000168387	0.000149072	0.000168401	0.000153986	0.000146791	0.000206701	0.000145944	0.000187306	0.000167625	0.000192865	0.000149485	0.00021251	0.000138491	0.00017648	0.000216373	0.000171678	0.201584	0.328919	-2.38203
K11041	9.92e-06	9.92e-06	2.28e-05	1.7e-05	1.37e-05	8.55e-06	1.67e-05	5.44e-06	2.19e-05	2.34e-05	4.93e-06	1.13e-05	1.87e-05	0	1.22e-05	0	9.62e-06	5.92e-06	0.20127	0.328516	0.531471
K18778	9.92e-06	3.31e-06	9.1e-06	4.26e-06	4.55e-06	8.55e-06	3.34e-06	5.44e-06	3.65e-06	0	0	0	4.67e-06	6.07e-06	4.07e-06	1.26e-05	4.81e-06	0	0.201232	0.328516	0.423576
K19050	9.92e-06	6.61e-06	9.1e-06	0	0	0	3.34e-06	5.44e-06	0	0	0	0	4.67e-06	0	4.07e-06	6.3e-06	0	0	0.200444	0.327385	0.255993
K01256	2.98e-05	3.31e-05	3.64e-05	2.98e-05	5.01e-05	2.57e-05	5.67e-05	3.81e-05	5.11e-05	1.87e-05	2.47e-05	2.27e-05	1.87e-05	5.46e-05	2.44e-05	3.78e-05	2.4e-05	5.33e-05	0.200339	0.327323	0.878596
K02995	9.92e-06	9.92e-06	9.1e-06	4.26e-06	4.55e-06	8.55e-06	1e-05	1.09e-05	1.09e-05	4.68e-06	1.48e-05	1.7e-05	4.67e-06	2.43e-05	4.07e-06	1.89e-05	4.81e-06	1.78e-05	0.199324	0.325774	-0.578642
K06193	4.96e-06	3.31e-06	0	4.26e-06	4.55e-06	4.28e-06	3.34e-06	5.44e-06	3.65e-06	0	4.93e-06	5.67e-06	1.4e-05	1.21e-05	8.15e-06	1.26e-05	0	0	0.199074	0.325473	-0.38893
K08965	4.96e-06	6.61e-06	0	0	4.55e-06	0	0	0	3.65e-06	9.37e-06	4.93e-06	5.67e-06	9.34e-06	0	4.07e-06	0	4.81e-06	0	0.199043	0.325473	-0.317391
K09000	4.96e-06	1.65e-05	1.37e-05	1.7e-05	2.28e-05	4.28e-06	1.67e-05	1.09e-05	1.46e-05	9.37e-06	9.86e-06	1.7e-05	1.87e-05	3.04e-05	1.22e-05	3.78e-05	9.62e-06	2.37e-05	0.198979	0.325473	-0.619973
K00809	9.92e-06	3.31e-05	1.82e-05	8.52e-06	9.1e-06	8.55e-06	3.34e-05	2.18e-05	2.19e-05	1.87e-05	2.96e-05	3.4e-05	1.4e-05	3.04e-05	1.22e-05	3.15e-05	1.44e-05	3.55e-05	0.19816	0.324305	-0.698049
K06191	4.96e-06	0	0	0	9.1e-06	0	3.34e-06	0	3.65e-06	4.68e-06	0	1.13e-05	4.67e-06	6.07e-06	0	0	4.81e-06	1.18e-05	0.19804	0.324215	-0.292706
K01598	4.96e-06	9.92e-06	1.82e-05	8.52e-06	9.1e-06	4.28e-06	1.33e-05	0	1.09e-05	9.37e-06	9.86e-06	5.67e-06	9.34e-06	3.04e-05	4.07e-06	1.89e-05	9.62e-06	2.37e-05	0.19794	0.324161	-0.485725
K18532	4.96e-06	1.32e-05	9.1e-06	4.26e-06	4.55e-06	4.28e-06	1.33e-05	1.63e-05	1.09e-05	9.37e-06	1.48e-05	2.27e-05	4.67e-06	1.82e-05	4.07e-06	1.89e-05	4.81e-06	1.78e-05	0.19788	0.324161	-0.576872
K15836	0	0	0	4.26e-06	0	0	0	0	0	0	4.93e-06	0	0	6.07e-06	0	6.3e-06	0	0	0.197799	0.324146	-0.167652
K01505	0	0	0	4.26e-06	4.55e-06	0	0	0	3.65e-06	4.68e-06	4.93e-06	0	0	6.07e-06	0	6.3e-06	4.81e-06	0	0.197707	0.324105	-0.277843
K17249	0	0	0	4.26e-06	4.55e-06	0	0	0	3.65e-06	4.68e-06	4.93e-06	0	0	6.07e-06	0	6.3e-06	4.81e-06	0	0.197707	0.324105	-0.277843
K01574	0	0	0	0	4.55e-06	0	0	0	0	0	0	0	0	6.07e-06	0	6.3e-06	0	5.92e-06	0.197498	0.323978	-0.168772
K01126	0.000550486	0.000704149	0.000609834	0.000707027	0.00059623	0.000573171	0.000597172	0.00056027	0.000685936	0.000655572	0.000655709	0.000754443	0.000555898	0.00074075	0.000610988	0.000680709	0.000677969	0.000609752	0.197285	0.323738	-3.27617
K01728	3.97e-05	2.98e-05	5.46e-05	5.54e-05	5.46e-05	2.99e-05	2e-05	7.07e-05	2.55e-05	4.68e-06	3.45e-05	2.84e-05	1.87e-05	6.07e-05	3.67e-05	6.3e-05	4.81e-06	1.78e-05	0.19682	0.323083	0.596262
K07577	4.96e-06	9.92e-06	4.55e-06	4.26e-06	4.55e-06	4.28e-06	6.67e-06	1.63e-05	1.09e-05	9.37e-06	1.48e-05	5.67e-06	4.67e-06	2.43e-05	4.07e-06	1.26e-05	9.62e-06	1.18e-05	0.196378	0.322466	-0.545965
K02837	0.000535608	0.000436374	0.00040959	0.000459993	0.000505202	0.000513288	0.000473734	0.000533072	0.000459723	0.000472948	0.000384551	0.000419765	0.000439113	0.00038859	0.000590622	0.000415989	0.000504871	0.000378875	0.196286	0.322423	2.56371
K07708	9.92e-06	3.31e-06	1.37e-05	4.26e-06	4.55e-06	1.28e-05	6.67e-06	1.09e-05	3.65e-06	4.68e-06	4.93e-06	0	9.34e-06	6.07e-06	4.07e-06	1.26e-05	4.81e-06	0	0.196023	0.322098	0.510648
K15780	3.97e-05	5.29e-05	3.19e-05	4.26e-05	5.01e-05	4.71e-05	1.67e-05	2.18e-05	2.55e-05	4.68e-05	3.45e-05	5.11e-05	5.14e-05	7.29e-05	3.26e-05	6.3e-05	2.88e-05	2.96e-05	0.195567	0.321457	-0.918029
K02565	0	0	0	0	0	0	0	0	3.65e-06	0	0	0	4.67e-06	0	4.07e-06	0	9.62e-06	0	0.195342	0.321195	-0.153307
K09251	9.92e-06	9.92e-06	9.1e-06	1.7e-05	1.82e-05	2.14e-05	1.67e-05	1.63e-05	1.82e-05	9.37e-06	4.93e-06	1.7e-05	4.67e-06	1.82e-05	4.07e-06	6.3e-06	1.44e-05	2.37e-05	0.19501	0.320757	0.720274
K11337	0	6.61e-06	4.55e-06	8.52e-06	9.1e-06	0	6.67e-06	1.63e-05	7.3e-06	4.68e-06	0	0	0	1.21e-05	0	1.26e-05	0	0	0.194639	0.320255	0.306288
K15527	2.48e-05	2.64e-05	2.73e-05	2.13e-05	1.82e-05	2.14e-05	2.34e-05	2.18e-05	1.82e-05	2.81e-05	1.97e-05	2.27e-05	2.8e-05	3.64e-05	2.04e-05	2.52e-05	1.92e-05	2.96e-05	0.194471	0.320086	-1.67685
K11131	4.96e-06	6.61e-06	1.37e-05	8.52e-06	9.1e-06	8.55e-06	1.33e-05	1.09e-05	1.09e-05	9.37e-06	1.97e-05	1.7e-05	4.67e-06	3.04e-05	4.07e-06	1.26e-05	4.81e-06	2.37e-05	0.193904	0.31926	-0.551609
K00655	0.00145309	0.00153723	0.00140171	0.00144813	0.00144279	0.00136877	0.00146124	0.00143603	0.00142295	0.00149377	0.00148397	0.00136707	0.00154624	0.00139649	0.00147044	0.00143075	0.0015627	0.00156878	0.193538	0.318765	-7.79389
K13001	4.96e-06	6.61e-06	4.55e-06	0	9.1e-06	0	6.67e-06	5.44e-06	3.65e-06	9.37e-06	1.48e-05	0	9.34e-06	1.21e-05	8.15e-06	6.3e-06	4.81e-06	0	0.193065	0.318092	-0.458379
K02335	0.000912517	0.000826465	0.000823731	0.000817766	0.000878415	0.000816983	0.000844048	0.000805048	0.000788097	0.000908435	0.000882495	0.000816841	0.000887568	0.000910758	0.00083909	0.000850887	0.000778944	0.000876149	0.192977	0.318054	-6.63489
K16139	1.98e-05	9.92e-06	2.28e-05	3.41e-05	3.19e-05	2.14e-05	2.34e-05	2.18e-05	2.19e-05	1.87e-05	3.94e-05	2.84e-05	3.27e-05	2.43e-05	3.67e-05	2.52e-05	1.92e-05	2.37e-05	0.192828	0.317916	-1.14226
K10819	0	0	4.55e-06	0	0	8.55e-06	3.34e-06	5.44e-06	0	0	0	0	0	0	0	6.3e-06	0	0	0.192661	0.317748	0.187443
K19802	0.000153739	8.93e-05	0.000145632	0.000119258	0.000113784	0.000124045	0.000103421	0.000152306	0.000109458	0.000107701	0.000113393	0.000175848	0.000168171	0.000133578	0.000154784	0.000113452	0.000125016	0.000159838	0.192445	0.317499	-1.74015
K02588	0.000109105	0.000105788	9.1e-05	0.000102221	0.000122887	0.000106935	9.67e-05	8.7e-05	8.03e-05	0.000103018	0.000103533	0.000102105	8.41e-05	0.00013965	0.000138491	0.000151269	9.62e-05	9.47e-05	0.192322	0.317403	-1.78838
K11905	0	3.31e-06	4.55e-06	0	0	0	0	5.44e-06	0	4.68e-06	0	0	0	0	4.07e-06	6.3e-06	9.62e-06	5.92e-06	0.192254	0.317398	-0.263522
K09167	1.49e-05	2.64e-05	3.19e-05	1.28e-05	1.82e-05	8.55e-06	1.33e-05	2.72e-05	1.82e-05	9.37e-06	4.93e-06	1.13e-05	1.87e-05	1.21e-05	3.26e-05	1.26e-05	4.81e-06	1.78e-05	0.192151	0.317335	0.65001
K06286	2.98e-05	3.97e-05	4.55e-05	2.98e-05	4.55e-05	2.99e-05	3.67e-05	2.72e-05	3.65e-05	6.09e-05	3.94e-05	3.97e-05	6.54e-05	4.25e-05	2.04e-05	3.15e-05	2.88e-05	6.51e-05	0.191985	0.317167	-1.01557
K03406	0.000466177	0.000661172	0.000691752	0.00095406	0.00116515	0.000932473	0.000914107	0.00140339	0.00083188	0.000561919	0.000443713	0.000720408	0.000644655	0.000673961	0.00141749	0.000655498	0.000860685	0.000343356	0.191569	0.316587	0.879141
K03977	0.000957151	0.000935559	0.000942057	0.000911468	0.00100585	0.000932473	0.000874073	0.000854003	0.000941338	0.000959945	0.000902216	0.000975671	0.000966982	0.000922901	0.000912409	0.00100216	0.000947234	0.00100047	0.191315	0.316273	-7.48298
K09803	7.44e-05	5.95e-05	9.1e-05	6.39e-05	9.56e-05	0.000102658	9.34e-05	7.07e-05	0.000116755	8.43e-05	6.41e-05	7.94e-05	6.07e-05	9.11e-05	7.33e-05	8.19e-05	6.73e-05	7.7e-05	0.190456	0.31496	1.70439
K01119	0.000158699	0.000132234	0.000154734	0.000136294	0.000154747	0.000149709	0.000143455	0.000168625	0.00015689	0.000117066	0.000133114	0.000124795	0.000158828	0.000157865	0.00016293	0.000157572	0.000139441	0.000106559	0.190223	0.314681	2.81511
K13891	1.98e-05	1.32e-05	2.73e-05	4.26e-06	9.1e-06	1.28e-05	2.34e-05	2.72e-05	2.55e-05	4.68e-06	4.93e-06	1.13e-05	2.34e-05	6.07e-06	1.22e-05	6.3e-06	3.37e-05	5.92e-06	0.190105	0.314592	0.525309
K00231	0	6.61e-06	4.55e-06	4.26e-06	9.1e-06	4.28e-06	6.67e-06	5.44e-06	7.3e-06	9.37e-06	4.93e-06	5.67e-06	9.34e-06	1.82e-05	4.07e-06	1.89e-05	0	5.92e-06	0.189295	0.313357	-0.464713
K02063	1.49e-05	1.32e-05	1.37e-05	8.52e-06	1.37e-05	1.28e-05	1.67e-05	1.63e-05	2.19e-05	1.4e-05	2.96e-05	2.27e-05	4.67e-06	2.43e-05	8.15e-06	3.15e-05	1.44e-05	2.37e-05	0.189063	0.31308	-0.77649
K04046	2.98e-05	1.32e-05	1.37e-05	4.26e-06	0	4.28e-06	6.67e-06	0	7.3e-06	0	4.93e-06	5.67e-06	0	1.21e-05	0	1.26e-05	0	0	0.188944	0.312988	0.274573
K10201	0.000213251	0.000208269	0.000177489	0.000174627	0.000236671	0.000179651	0.000150127	0.000174064	0.000160538	0.000309055	0.000221856	0.00020421	0.000266271	0.000133578	0.000248468	0.00013236	0.00025484	0.000177598	0.188845	0.31293	-1.39504
K18325	0	0	0	0	0	0	0	0	3.65e-06	0	0	0	4.67e-06	6.07e-06	0	0	4.81e-06	0	0.188666	0.312739	-0.170078
K10121	9.92e-06	6.61e-06	9.1e-06	4.26e-05	3.64e-05	2.14e-05	2.67e-05	2.72e-05	1.09e-05	9.37e-06	9.86e-06	2.27e-05	1.4e-05	6.07e-06	2.44e-05	1.26e-05	2.4e-05	5.92e-06	0.187788	0.311389	0.546481
K02001	1.98e-05	6.61e-06	2.73e-05	0	0	4.28e-06	0	5.44e-06	0	0	0	0	4.67e-06	0	4.07e-06	6.3e-06	0	5.92e-06	0.18763	0.311233	0.210391
K00836	2.48e-05	2.64e-05	1.82e-05	4.26e-05	3.64e-05	5.13e-05	3.67e-05	3.81e-05	2.92e-05	2.81e-05	5.92e-05	2.84e-05	3.27e-05	4.86e-05	3.26e-05	4.41e-05	4.33e-05	4.74e-05	0.187169	0.310573	-1.1677
K01283	2.98e-05	1.32e-05	1.82e-05	1.28e-05	4.55e-06	2.14e-05	2.34e-05	1.63e-05	1.82e-05	0	9.86e-06	1.7e-05	9.34e-06	2.43e-05	0	2.52e-05	4.81e-06	1.78e-05	0.186929	0.31028	0.570572
K07669	0	0	0	0	0	0	0	0	3.65e-06	4.68e-06	0	0	0	0	0	6.3e-06	4.81e-06	0	0.186802	0.310175	-0.170152
K18478	4.96e-06	3.31e-06	4.55e-06	8.52e-06	0	4.28e-06	0	1.09e-05	7.3e-06	4.68e-06	4.93e-06	1.13e-05	4.67e-06	6.07e-06	4.07e-06	6.3e-06	9.62e-06	1.18e-05	0.186158	0.309211	-0.582502
K02533	7.93e-05	5.95e-05	5.46e-05	5.54e-05	5.01e-05	4.28e-05	8.34e-05	4.35e-05	6.57e-05	3.28e-05	4.93e-05	5.11e-05	3.74e-05	7.89e-05	3.67e-05	7.56e-05	3.85e-05	4.14e-05	0.185816	0.308747	1.1247
K11202	9.92e-06	6.61e-06	4.55e-06	4.26e-06	9.1e-06	4.28e-06	3.34e-06	5.44e-06	3.65e-06	4.68e-06	0	0	0	1.21e-05	4.07e-06	0	4.81e-06	5.92e-06	0.185323	0.308032	0.452053
K10235	4.96e-06	3.31e-06	4.55e-06	0	0	0	0	0	3.65e-06	4.68e-06	4.93e-06	0	0	6.07e-06	4.07e-06	6.3e-06	4.81e-06	0	0.18531	0.308032	-0.351736
K10557	4.96e-06	9.92e-06	9.1e-06	1.28e-05	9.1e-06	0	6.67e-06	1.63e-05	1.09e-05	9.37e-06	9.86e-06	1.13e-05	9.34e-06	1.82e-05	4.07e-06	1.89e-05	9.62e-06	1.78e-05	0.185118	0.307901	-0.70163
K02519	0.000763737	0.00082316	0.000755466	0.000762396	0.000791939	0.000782764	0.00076398	0.00078329	0.000737016	0.000805417	0.000793753	0.000777133	0.000808154	0.000758965	0.000810577	0.000743738	0.000778944	0.000876149	0.185053	0.307897	-7.99282
K03415	7.44e-05	9.26e-05	7.74e-05	0.000132035	0.000141093	0.000106935	0.000116766	0.000141427	0.000127701	8.9e-05	6.41e-05	0.000102105	0.000116785	8.5e-05	0.000146637	6.3e-05	0.000110591	7.7e-05	0.184534	0.307139	1.28132
K03451	4.46e-05	4.3e-05	3.64e-05	6.39e-05	5.46e-05	6.84e-05	4.34e-05	5.44e-05	5.47e-05	5.15e-05	4.44e-05	3.97e-05	3.74e-05	2.43e-05	6.92e-05	4.41e-05	3.85e-05	4.74e-05	0.184111	0.306539	1.38166
K03930	9.92e-06	1.65e-05	1.82e-05	1.7e-05	1.82e-05	1.71e-05	1e-05	1.63e-05	7.3e-06	9.37e-06	1.97e-05	2.84e-05	9.34e-06	3.64e-05	2.44e-05	1.89e-05	1.44e-05	1.18e-05	0.183893	0.306279	-0.773303
K10010	5.95e-05	4.63e-05	5.92e-05	5.11e-05	5.01e-05	6.84e-05	4e-05	4.35e-05	6.57e-05	6.56e-05	4.44e-05	8.51e-05	4.2e-05	4.86e-05	6.11e-05	5.04e-05	9.62e-05	8.29e-05	0.183263	0.305334	-1.23643
K03338	4.46e-05	2.31e-05	3.19e-05	2.13e-05	2.28e-05	2.14e-05	2.67e-05	4.35e-05	3.28e-05	3.28e-05	3.94e-05	1.7e-05	5.61e-05	2.43e-05	6.92e-05	3.78e-05	3.85e-05	2.96e-05	0.183242	0.305334	-0.863167
K10742	4.96e-06	0	0	0	0	4.28e-06	3.34e-06	0	0	4.68e-06	4.93e-06	0	0	6.07e-06	0	6.3e-06	0	5.92e-06	0.183205	0.305334	-0.285138
K00100	3.97e-05	4.63e-05	4.55e-05	2.56e-05	5.01e-05	2.14e-05	4.34e-05	3.81e-05	5.47e-05	4.21e-05	1.48e-05	3.4e-05	3.74e-05	3.04e-05	4.89e-05	1.89e-05	4.33e-05	2.96e-05	0.183155	0.305334	1.0962
K03642	7.44e-05	5.62e-05	8.65e-05	5.11e-05	5.01e-05	4.28e-05	8.34e-05	6.53e-05	8.03e-05	3.75e-05	5.42e-05	4.54e-05	4.67e-05	7.89e-05	4.89e-05	8.19e-05	4.33e-05	5.92e-05	0.182883	0.305116	1.24726
K03444	9.92e-06	9.92e-06	1.37e-05	1.7e-05	2.28e-05	2.14e-05	6.67e-06	2.72e-05	1.09e-05	9.37e-06	9.86e-06	1.13e-05	1.87e-05	1.21e-05	2.04e-05	6.3e-06	9.62e-06	5.92e-06	0.182872	0.305116	0.730917
K22606	4.96e-06	9.92e-06	0	4.26e-06	0	4.28e-06	0	5.44e-06	3.65e-06	9.37e-06	4.93e-06	5.67e-06	4.67e-06	6.07e-06	8.15e-06	6.3e-06	4.81e-06	0	0.1827	0.305019	-0.510887
K11442	0	6.61e-06	0	0	4.55e-06	0	3.34e-06	0	0	0	1.97e-05	1.13e-05	0	0	4.07e-06	0	0	1.18e-05	0.182543	0.304861	-0.205176
K06609	0	9.92e-06	0	0	4.55e-06	0	0	0	0	0	0	0	0	0	0	0	0	0	0.182523	0.304861	0.108231
K09127	0	6.61e-06	9.1e-06	8.52e-06	9.1e-06	0	1e-05	5.44e-06	7.3e-06	4.68e-06	0	1.13e-05	1.4e-05	2.43e-05	8.15e-06	1.89e-05	4.81e-06	5.92e-06	0.182098	0.304325	-0.446282
K01664	1.49e-05	9.92e-06	4.55e-06	1.28e-05	4.55e-06	4.28e-06	6.67e-06	5.44e-06	1.09e-05	4.68e-06	0	5.67e-06	0	1.21e-05	4.07e-06	6.3e-06	4.81e-06	1.18e-05	0.182009	0.304281	0.544739
K05922	4.96e-06	3.31e-06	4.55e-06	4.26e-06	4.55e-06	0	3.34e-06	0	3.65e-06	9.37e-06	4.93e-06	0	4.67e-06	6.07e-06	4.07e-06	6.3e-06	9.62e-06	0	0.181792	0.304023	-0.487287
K04651	0.000114065	0.000254551	0.000218448	0.000183146	0.000172952	0.000119767	0.000240203	0.000163185	0.000251753	0.00021072	0.000231717	0.000192865	0.000196199	0.000230725	0.000199589	0.000207995	0.000211565	0.000301916	0.181501	0.303639	-1.51712
K09943	0	3.31e-06	4.55e-06	0	0	0	3.34e-06	0	0	4.68e-06	0	5.67e-06	4.67e-06	0	4.07e-06	0	0	5.92e-06	0.18145	0.303639	-0.2851
K01092	0.000287641	0.000300833	0.000295815	0.000276848	0.000277634	0.000256644	0.000310263	0.000315492	0.000288239	0.000220085	0.000246507	0.000277953	0.000228899	0.000333945	0.000199589	0.00035296	0.000221181	0.000290076	0.181011	0.303026	2.27773
K01938	0.000679429	0.000700843	0.000650793	0.000664435	0.000773733	0.000697216	0.000697257	0.00077785	0.00067499	0.000721129	0.000778962	0.00070339	0.000756769	0.000704319	0.00068838	0.000687012	0.000764519	0.000751831	0.180083	0.301576	-5.87246
K16179	0	3.31e-06	0	0	0	0	0	0	7.3e-06	0	4.93e-06	5.67e-06	0	1.21e-05	0	1.26e-05	0	0	0.179446	0.300612	-0.203946
K09786	0	0	0	0	0	0	0	0	0	0	0	0	0	6.07e-06	0	1.26e-05	0	0	0.17903	0.300019	-0.109878
K01738	0.00100675	0.00104135	0.0011332	0.00104776	0.00106047	0.000996634	0.00108759	0.00113686	0.00107999	0.0011613	0.00113393	0.00107778	0.00106508	0.00108684	0.00107941	0.00112821	0.00103859	0.00108335	0.1789	0.299903	-8.10069
K03458	0.000183495	0.000158681	0.000150183	0.000170368	0.000163849	0.000201038	0.000170144	0.00022302	0.000160538	0.000131114	9.37e-05	9.64e-05	0.000224228	9.11e-05	0.000256615	0.000100846	0.000206757	7.7e-05	0.178898	0.299903	1.0355
K00549	4.46e-05	2.64e-05	5.46e-05	3.83e-05	6.83e-05	3.85e-05	4e-05	3.26e-05	4.01e-05	2.81e-05	2.96e-05	3.4e-05	1.87e-05	6.07e-05	3.26e-05	4.41e-05	3.37e-05	2.96e-05	0.178013	0.29862	1.06014
K01207	0.000416584	0.000452903	0.000523365	0.000511104	0.000477894	0.000436295	0.000493751	0.000402524	0.000459723	0.000454218	0.000497944	0.000487835	0.00046247	0.000461451	0.00051323	0.000460109	0.000596228	0.000497274	0.177393	0.297682	-3.71075
K09775	0.000486015	0.000446291	0.000336774	0.000417401	0.000455137	0.000483346	0.000420356	0.000386205	0.000463372	0.000444852	0.000409202	0.000334678	0.000490498	0.000346088	0.000395106	0.000359263	0.000456788	0.000343356	0.177384	0.297682	2.62549
K00171	0.000138861	0.000158681	0.00013653	0.000208701	0.000218466	0.000273753	0.000163472	0.000130548	0.000167835	0.000168576	0.000142974	0.000153158	0.000168171	0.000151793	0.000171077	0.000151269	0.000105782	0.000165758	0.176997	0.297221	1.51099
K22405	2.48e-05	3.64e-05	2.28e-05	2.98e-05	1.82e-05	1.71e-05	1e-05	2.18e-05	1.46e-05	1.87e-05	1.48e-05	1.7e-05	9.34e-06	1.21e-05	2.85e-05	1.26e-05	2.88e-05	5.92e-06	0.176721	0.29686	0.798014
K01342	4.96e-06	3.31e-06	1.37e-05	0	4.55e-06	4.28e-06	6.67e-06	5.44e-06	0	4.68e-06	0	0	4.67e-06	6.07e-06	0	6.3e-06	0	0	0.176496	0.296583	0.338844
K20370	0	3.31e-06	4.55e-06	0	0	0	0	0	0	0	4.93e-06	5.67e-06	0	6.07e-06	0	0	0	5.92e-06	0.176476	0.296583	-0.229677
K00951	0.00110097	0.000942171	0.000996669	0.000971097	0.00112419	0.00103941	0.00103087	0.000951915	0.000948635	0.000927166	0.000976168	0.000958653	0.00106508	0.000928973	0.00103868	0.000907613	0.000918384	0.00101231	0.176476	0.296583	5.31506
K07093	0	3.31e-06	4.55e-06	4.26e-06	4.55e-06	0	0	0	0	4.68e-06	0	5.67e-06	0	6.07e-06	4.07e-06	6.3e-06	4.81e-06	0	0.176256	0.296485	-0.359557
K16651	9.92e-06	1.65e-05	9.1e-06	8.52e-06	0	8.55e-06	6.67e-06	5.44e-06	7.3e-06	0	4.93e-06	0	9.34e-06	1.21e-05	8.15e-06	6.3e-06	4.81e-06	0	0.174696	0.293962	0.499474
K05666	0	0	0	0	0	0	0	0	0	9.37e-06	0	0	0	0	0	0	4.81e-06	0	0.174691	0.293962	-0.111973
K01974	4.96e-06	1.32e-05	4.55e-06	4.26e-06	4.55e-06	8.55e-06	1e-05	1.63e-05	7.3e-06	9.37e-06	1.48e-05	2.84e-05	0	3.04e-05	4.07e-06	1.26e-05	4.81e-06	1.78e-05	0.174678	0.293962	-0.451607
K04095	0.000312438	0.000350421	0.000373182	0.000293885	0.000309493	0.000384966	0.000353633	0.000375326	0.000335671	0.000379295	0.000256367	0.00031766	0.000341013	0.000364303	0.000321787	0.000327749	0.000274073	0.000284156	0.174551	0.293962	2.99739
K01965	0	6.61e-06	9.1e-06	4.26e-06	4.55e-06	4.28e-06	1e-05	1.63e-05	0	4.68e-06	0	0	4.67e-06	0	4.07e-06	6.3e-06	4.81e-06	5.92e-06	0.174263	0.293638	0.38934
K15876	9.92e-06	9.92e-06	1.82e-05	4.26e-06	9.1e-06	4.28e-06	1e-05	1.09e-05	7.3e-06	9.37e-06	4.93e-06	5.67e-06	4.67e-06	6.07e-06	8.15e-06	6.3e-06	1.44e-05	0	0.17414	0.293531	0.662013
K07568	0.00118528	0.00112399	0.00116961	0.00112869	0.00118791	0.00109074	0.00105756	0.00113142	0.00111282	0.00110979	0.00118323	0.00108912	0.0011445	0.00104434	0.00107941	0.0010967	0.00103859	0.00113071	0.174045	0.293472	8.31101
K02041	4.96e-05	5.62e-05	5.46e-05	6.39e-05	3.19e-05	3.85e-05	6.67e-05	5.98e-05	8.39e-05	5.15e-05	7.89e-05	5.67e-05	5.61e-05	8.5e-05	7.74e-05	5.67e-05	5.29e-05	7.7e-05	0.173958	0.293427	-1.41518
K02458	0	0	9.1e-06	0	4.55e-06	0	0	5.44e-06	3.65e-06	0	0	0	0	6.07e-06	0	0	0	0	0.173505	0.292763	0.194524
K03737	0.000614957	0.000700843	0.000628038	0.00058351	0.000628089	0.000573171	0.000593836	0.00066906	0.000602018	0.000697716	0.000665569	0.000623975	0.000658669	0.000686104	0.000590622	0.000636589	0.000586612	0.000704471	0.173424	0.292727	-5.01752
K06330	2.98e-05	1.98e-05	1.37e-05	2.98e-05	4.55e-05	4.71e-05	1.67e-05	1.09e-05	3.65e-05	1.4e-05	9.86e-06	2.84e-05	1.87e-05	1.21e-05	3.26e-05	1.89e-05	3.37e-05	1.18e-05	0.173413	0.292727	0.694042
K02464	4.96e-06	3.31e-06	4.55e-06	8.52e-06	4.55e-06	4.28e-06	6.67e-06	5.44e-06	0	4.68e-06	0	0	4.67e-06	6.07e-06	0	6.3e-06	4.81e-06	0	0.173227	0.292598	0.49234
[truncated: 2,897 more rows]
