# Supplementary material for: Captivity Influences the Gut Microbiome of Rhinopithecus roxellana
Source: Frontiers journal article supplement (doi:10.3389/fmicb.2021.763022), 2021-12-07
Supplement: Table_4.XLS [file Table_4.XLS]

## Sheet: A-taxonomic-differs
sample	R01	R02	R03	R04	R05	R06	R08	R09	R10	R14	R15	R16	R17	R18	R19	R20	R21	R22	Clades	p_value	p_value_FDR
group	CRr	CRr	CRr	CRr	CRr	CRr	CRr	CRr	CRr	WRr	WRr	WRr	WRr	WRr	WRr	WRr	WRr	WRr	-	-	-
Bacteria;Bacteroidetes	0.376966	0.324443	0.378087	0.270306	0.309611	0.266147	0.468305	0.534393	0.449049	0.00685174	0.00973682	0.00548744	0.130946	0.049179	0.189446	0.110954	0.00103194	0.017525	Phylum	3.89344e-07	2.94928e-05
Bacteria;Bacteroidetes;Bacteroidia	0.376966	0.324443	0.378087	0.270306	0.309611	0.266147	0.468305	0.534393	0.449049	0.00685174	0.00973682	0.00548744	0.130946	0.049179	0.189446	0.110954	0.00103194	0.017525	Class	3.89344e-07	2.94928e-05
Bacteria;Bacteroidetes;Bacteroidia;Bacteroidales	0.376966	0.324443	0.378087	0.270306	0.309611	0.266147	0.468305	0.534393	0.449049	0.00685174	0.00973682	0.00548744	0.130946	0.049179	0.189446	0.110954	0.00103194	0.017525	Order	3.89344e-07	2.94928e-05
Bacteria;Bacteroidetes;Bacteroidia;Bacteroidales;Muribaculaceae;Muribaculum	0.0025649	0.000987002	0.000992961	0.000935554	0.00149511	0.00215595	0.000264837	0.00237298	0.000582223	0	0	0	0	0	0	0	0	0	Genus	0.000126339	0.00229162
Bacteria;Bacteroidetes;Bacteroidia;Bacteroidales;Odoribacteraceae;Odoribacter	0.000398938	0.00106365	0.000657816	0.000212764	0.000463068	0.000859845	0.00128888	0.000331732	0.00176333	0	0	0	0	0	0	0	0	0	Genus	0.000305264	0.00403351
Bacteria;Bacteroidetes;Bacteroidia;Bacteroidales;Prevotellaceae	0.165833	0.156433	0.0707885	0.191523	0.246226	0.0723206	0.271442	0.327003	0.303686	0.00415085	0.00170066	0	0.0048154	0	0.00310591	0.00237289	0	0	Family	9.41735e-06	0.000438993
Bacteria;Bacteroidetes;Bacteroidia;Bacteroidales;Prevotellaceae;Prevotella	0.165833	0.156433	0.0707885	0.191523	0.246226	0.0723206	0.271442	0.327003	0.303686	0.00415085	0.00170066	0	0.0048154	0	0.00310591	0.00237289	0	0	Genus	9.41735e-06	0.000438993
Bacteria;Firmicutes	0.0860672	0.413862	0.218539	0.333869	0.347335	0.316114	0.242758	0.169442	0.247418	0.826234	0.857599	0.739068	0.618109	0.63479	0.682779	0.670576	0.761163	0.518796	Phylum	1.23978e-07	2.31953e-05
Bacteria;Firmicutes;Clostridia	0.0682261	0.380958	0.206426	0.255633	0.284733	0.276399	0.194605	0.141992	0.208981	0.735423	0.791494	0.674117	0.574923	0.548316	0.642961	0.568741	0.673109	0.438578	Class	1.91381e-07	2.31953e-05
Bacteria;Firmicutes;Clostridia;Clostridiales	0.0682261	0.380958	0.206426	0.255633	0.284733	0.276399	0.194605	0.141992	0.208981	0.735423	0.791494	0.674117	0.574923	0.548316	0.642961	0.568741	0.673109	0.438578	Order	1.91381e-07	2.31953e-05
Bacteria;Firmicutes;Clostridia;Clostridiales;Oscillospiraceae	0.00284718	0.00841132	0.0102346	0.0127863	0.00446083	0.00823341	0.0112628	0.00360619	0.00840589	0.115996	0.0830925	0.0865621	0.0518339	0.0595701	0.0516838	0.0672941	0.0747427	0.0610399	Family	7.67086e-08	2.31953e-05
Bacteria;Firmicutes;Clostridia;Clostridiales;Oscillospiraceae;Oscillibacter	0.00284718	0.00841132	0.0102346	0.0127863	0.00446083	0.00823341	0.0112628	0.00360619	0.00840589	0.115996	0.0830925	0.0865621	0.0518339	0.0595701	0.0516838	0.0672941	0.0747427	0.0610399	Genus	7.67086e-08	2.31953e-05
Bacteria;Firmicutes;Negativicutes	0.00695455	0.0231951	0.00526096	0.0438574	0.0288594	0.0330208	0.0350503	0.0215956	0.0251374	0	0	0	0	0	0	0	0	0	Class	2.20385e-05	0.000840737
Bacteria;Firmicutes;Negativicutes;Acidaminococcales	0.00551437	0.0110889	0.00424828	0.0309517	0.0268596	0.0238739	0.0287316	0.0213413	0.0212587	0	0	0	0	0	0	0	0	0	Order	2.63597e-05	0.000840737
Bacteria;Firmicutes;Negativicutes;Acidaminococcales;Acidaminococcaceae	0.00551437	0.0110889	0.00424828	0.0309517	0.0268596	0.0238739	0.0287316	0.0213413	0.0212587	0	0	0	0	0	0	0	0	0	Family	2.63597e-05	0.000840737
Bacteria;Firmicutes;Negativicutes;Acidaminococcales;Acidaminococcaceae;Phascolarctobacterium	0.00551437	0.0110889	0.00424828	0.0309517	0.0268596	0.0238739	0.0287316	0.0213413	0.0212587	0	0	0	0	0	0	0	0	0	Genus	2.63597e-05	0.000840737
Bacteria;Proteobacteria;Alphaproteobacteria	0.00595932	0.00620464	0.00976903	0.0101698	0.0165876	0.0055867	0.0130268	0.00354422	0.00490204	0	0	0	0	0	0	0	0	0.00706438	Class	0.000256308	0.00361215
Bacteria;Proteobacteria;Alphaproteobacteria;Rhodospirillales	0.00595932	0.00620464	0.00976903	0.0101698	0.0165876	0.0055867	0.0130268	0.00354422	0.00490204	0	0	0	0	0	0	0	0	0.00706438	Order	0.000256308	0.00361215
Bacteria;Proteobacteria;Alphaproteobacteria;Rhodospirillales;Rhodospirillaceae	0.00595932	0.00620464	0.00976903	0.0101698	0.0165876	0.0055867	0.0130268	0.00354422	0.00490204	0	0	0	0	0	0	0	0	0.00706438	Family	0.000256308	0.00361215
Bacteria;Proteobacteria;Alphaproteobacteria;Rhodospirillales;Rhodospirillaceae;Azospirillum	0.00411674	0.0054567	0.0088468	0.00234376	0.000444929	0.00346825	0.00486615	0.00249349	0.00315445	0	0	0	0	0	0	0	0	0	Genus	0.000145204	0.0025141
Clostridiales species incertae sedis [meta_mOTU_v25_12251]	0	0.000985721	0.000724028	0.000388468	0.000546289	0	0.000862214	0.00027119	0.000773167	0.0142543	0.0076867	0.0061761	0.00532938	0.0172111	0.00351159	0.0188404	0.0150301	0.00594555	Species	0.000106681	0.00222927
Clostridiales species incertae sedis [meta_mOTU_v25_12254]	0.000680857	0.000929797	0.0019077	0.00519937	0.00256345	0.00126781	0.0020711	0.00127461	0.000801713	0.0194656	0.0302025	0.0148188	0.0165436	0.0195427	0.00913635	0.0253974	0.0474717	0.0142608	Species	8.57851e-05	0.00193637
Clostridiales species incertae sedis [meta_mOTU_v25_12288]	0.000201428	0.000460852	0.000485734	0.00111348	0.000456479	0.000664048	0.001519	0.000278663	0.00163029	0.0167326	0.00460324	0.0160597	0.0055254	0.0117015	0.00421477	0.0133901	0.00839416	0.00522849	Species	8.6274e-05	0.00193637
Clostridiales species incertae sedis [meta_mOTU_v25_12298]	0	0.000647205	0.000253857	0.000775888	0	0.000227443	0.000282853	0	0.000419268	0.00508155	0.00291896	0.00588389	0.00532459	0.00388724	0.00307564	0.00154538	0.00866795	0.00282875	Species	3.55046e-05	0.00102456
Clostridiales species incertae sedis [meta_mOTU_v25_12309]	0	0.000197128	0	0	0	0	0	0	0	0.0122056	0.00512652	0.00446782	0.0039514	0.0143177	0.00416294	0.00821397	0.00637243	0.00433778	Species	4.94077e-05	0.00136096
Clostridiales species incertae sedis [meta_mOTU_v25_12437]	0.000400781	0.00108301	0.0012091	0.00240847	0.000574261	0.00100636	0.00172338	0.00109201	0.000831266	0.0226997	0.00847741	0.0138155	0.00918796	0.00247446	0.0120949	0.00866317	0.0209246	0.00918042	Species	0.000120634	0.00229162
Clostridiales species incertae sedis [meta_mOTU_v25_12516]	0.00123724	0.00210448	0.000386246	0.000644121	0.00152916	0.00105866	0.00234549	0.000862362	0.000995508	0.0341828	0.0141606	0.0166623	0.0050735	0.0273491	0.00379202	0.0264625	0.0205048	0.0113449	Species	0.00020831	0.00319645
Clostridiales species incertae sedis [meta_mOTU_v25_12534]	0.000300772	0.00100961	0.000615884	0.00154034	0.000749604	0.000488467	0.000622012	0.000709105	0.000956601	0.00968819	0.00899984	0.00457617	0.00508971	0.00825216	0.0048613	0.0127676	0.0091131	0.00492107	Species	2.68043e-06	0.000162434
Clostridiales species incertae sedis [meta_mOTU_v25_12691]	0.000176356	0.00102772	0.000699303	0.00097117	0.000800987	0.000665939	0.00172146	0.00117578	0.00110823	0.0464404	0.0350197	0.024997	0.00912509	0.0318379	0.00891089	0.0309372	0.0164155	0.0124967	Species	7.43283e-05	0.00180172
Clostridiales species incertae sedis [meta_mOTU_v25_12774]	0	0.000279564	0	0.000725271	0	0	0.000505953	0	0	0.00336166	0.00670733	0.00608633	0.0046127	0.0127025	0.00542927	0.00595279	0.00283421	0.00261488	Species	7.12479e-05	0.00179901
Clostridiales species incertae sedis [meta_mOTU_v25_12809]	0.00084189	0.000502393	0.000505426	0.001821	0.00204993	0.000914474	0.00308542	0.00360918	0.00154657	0.00593054	0.00820659	0.00358978	0.00727006	0.00328842	0.00433259	0.00732188	0.00969053	0.00338388	Species	0.000169313	0.00274019
Clostridiales species incertae sedis [meta_mOTU_v25_12855]	0.00381424	0.000782851	0.000255591	0.000224711	0	0.0003887	0.000916426	0.000189947	0.000491375	0.00581594	0.00217677	0.00407852	0.00547461	0.00709037	0.00462548	0.00425068	0.00225608	0.0013027	Species	0.000384136	0.00484972
Clostridiales species incertae sedis [meta_mOTU_v25_13159]	0.000172425	0.000963427	0.00154499	0.00110964	0.000402717	0.000678744	0.00140811	0.000918708	0.00118499	0.0293977	0.0143542	0.0131777	0.00571341	0.0122209	0.00464631	0.0194381	0.0140588	0.0125224	Species	6.86844e-05	0.00179901
Clostridiales species incertae sedis [meta_mOTU_v25_13187]	0	0	0	0	0	0	0	0	0	0.00876872	0.0058204	0.0066534	0.00456254	0.0046575	0	0.00396105	0.00782028	0.00124445	Species	0.000117272	0.00229162
Clostridiales species incertae sedis [meta_mOTU_v25_13242]	0.000300772	0.000172919	0.000254432	0.000320478	0	0.000722737	0.000260906	0.00045642	0.000415633	0.00525003	0.00550206	0.00777684	0.00181674	0.00585744	0.00232256	0.00511293	0.00629876	0.00371641	Species	2.65127e-06	0.000162434
Clostridiales species incertae sedis [meta_mOTU_v25_13976]	0.000624594	0.000413589	0.00115675	0.00267476	0.000923515	0.00169801	0.00192528	0.000527069	0.00148706	0.00403333	0.0069504	0.00529606	0.0106805	0.00317489	0.00786705	0.00251307	0.0106001	0.00638962	Species	0.000128573	0.00229162
Clostridiales species incertae sedis [meta_mOTU_v25_14342]	0.000322923	0.00069585	0.000248292	0.000657425	0.00127	0.000588144	0.000330958	0	0.00099714	0.0028469	0.008454	0.00641881	0	0.00391782	0.00514906	0.0025817	0.00509199	0.00434287	Species	0.000306174	0.00403351
Firmicutes bacterium CAG:170 [ref_mOTU_v25_07733]	0	0	0.000254433	0	0	0	0.000141427	0	0	0.0179534	0.024681	0.012968	0.00810669	0.00922809	0.000623435	0.0222892	0.0197606	0.0051679	Species	0.000171827	0.00274019
Firmicutes species incertae sedis [meta_mOTU_v25_12975]	0	0.000432782	0	0.00106757	0	0	0	0.000896624	0.00112435	0.0144178	0.0141371	0.0136996	0.0052394	0.0204407	0.00452577	0.0329865	0.0171791	0.00723629	Species	0.000210987	0.00319645
Muribaculum intestinale [ref_mOTU_v25_10099]	0.0025649	0.000987002	0.000992961	0.000935554	0.00149511	0.00215595	0.000264837	0.00237298	0.000582223	0	0	0	0	0	0	0	0	0	Species	0.000126339	0.00229162
Odoribacter splanchnicus [ref_mOTU_v25_03697]	0.000398938	0.00106365	0.000657816	0.000212764	0.000463068	0.000859845	0.00128888	0.000331732	0.00176333	0	0	0	0	0	0	0	0	0	Species	0.000305264	0.00403351
Oscillibacter sp. [ref_mOTU_v25_04664]	0.000174963	0.000533567	0.00187922	0.000513158	0.000437649	0.000613879	0.00146365	0.000285111	0.00105991	0.0129627	0.00698057	0.0105951	0.008074	0.00938774	0.00456818	0.0207527	0.0124609	0.00736844	Species	1.77101e-05	0.000766594
Oscillibacter sp. 1-3 [ref_mOTU_v25_07502]	0.000169455	0.000272913	0.000303256	0.000425047	0.000486609	0	0.000379884	0.000263535	0.000388673	0.010552	0.00446114	0.00346751	0.00352055	0.00408231	0.00160312	0.00251307	0.00451215	0.0027464	Species	0.000373985	0.00482202
Oscillibacter sp. 57_20 [meta_mOTU_v25_12610]	0.000515609	0.0016068	0.000840908	0.00221788	0.000801927	0.00206861	0.00197105	0.000807518	0.00122439	0.0408131	0.0352296	0.0289052	0.0165019	0.0207046	0.0150893	0.0150258	0.0215347	0.012999	Species	6.43975e-06	0.000354772
Oscillibacter species incertae sedis [meta_mOTU_v25_12663]	0.0003749	0.000464493	0.00135382	0.000641923	0	0.0010535	0.000991107	0.000662568	0.000572823	0.0105343	0.00373148	0.00416746	0.00175028	0.00663045	0.00445095	0.00546294	0.00617036	0.00313048	Species	9.06934e-05	0.00196286
Phascolarctobacterium succinatutens [ref_mOTU_v25_03700]	0.00551437	0.0110889	0.00424828	0.0309517	0.0268596	0.0238739	0.0287316	0.0213413	0.0212587	0	0	0	0	0	0	0	0	0	Species	2.63597e-05	0.000840737
Pseudoflavonifractor capillosus [ref_mOTU_v25_02969]	0.000286249	0.000862214	0.0013491	0.000575128	0.000475249	0.000326469	0.000973307	0.000332791	0.000620657	0.00305501	0.00461384	0.00502902	0.00331521	0.00182162	0.00679216	0.00327605	0.00371906	0.00185207	Species	3.20687e-05	0.000971681
uncultured Flavonifractor sp. [ref_mOTU_v25_07315]	0	0.000491765	0	0.000549951	0.000299549	0	0.000608503	0.000533498	0.000396168	0.00192483	0.00113644	0.000983474	0.00117261	0.00308887	0.000797287	0.00252682	0.00154858	0.00150499	Species	0.000155892	0.00262418

## Sheet: B-functional-Knumber-differs
sample	R01	R02	R03	R04	R05	R06	R08	R09	R10	R14	R15	R16	R17	R18	R19	R20	R21	R22	p_value	FDR_p_value	beta	discription
group	CRr	CRr	CRr	CRr	CRr	CRr	CRr	CRr	CRr	WRr	WRr	WRr	WRr	WRr	WRr	WRr	WRr	WRr	-	-	-	-
K00986	0.000104146	9.92e-05	0.000104673	0.000102221	0.00010013	8.98e-05	8.34e-05	9.79e-05	8.39e-05	4.21e-05	2.96e-05	3.4e-05	4.2e-05	4.25e-05	3.67e-05	4.41e-05	3.37e-05	4.14e-05	6.00765e-12	2.94075e-08	1.11603	ltrA; RNA-directed DNA polymerase
K18234	0.000163658	0.000145458	0.000172938	0.000144813	0.00013199	0.000145432	0.000166808	0.000168625	0.000175133	3.28e-05	1.97e-05	3.97e-05	5.14e-05	3.64e-05	6.52e-05	1.89e-05	1.92e-05	4.14e-05	1.82321e-11	3.00522e-08	0.868885	vat; virginiamycin A acetyltransferase
K07590	0.000183495	0.000201658	0.00022755	0.000208701	0.000209363	0.000205315	0.000240203	0.000201262	0.000197024	0.000355882	0.00036976	0.000329005	0.000336342	0.000358231	0.000329934	0.000384475	0.000375047	0.000378875	1.84181e-11	3.00522e-08	-0.894441	RP-L7A, rplGB; large subunit ribosomal protein L7A
K07048	2.48e-05	3.64e-05	1.82e-05	5.54e-05	4.1e-05	2.99e-05	3.34e-05	3.81e-05	4.01e-05	9.37e-05	0.000108463	0.000119123	9.34e-05	0.000103219	0.000105905	0.000119754	0.000105782	9.47e-05	1.55082e-10	1.89782e-07	-0.300344	PTER, php; phosphotriesterase-related protein
K05286	4.96e-06	3.31e-06	4.55e-06	4.26e-06	4.55e-06	4.28e-06	6.67e-06	5.44e-06	3.65e-06	0	0	0	0	0	0	0	0	0	2.19498e-10	2.13937e-07	0.666908	PIGB; phosphatidylinositol glycan, class B
K03154	0.000342194	0.000300833	0.000327672	0.000327958	0.000336801	0.000393521	0.000316935	0.000348129	0.000299185	0.000154528	0.000147904	0.000153158	0.000177514	0.000170008	0.000195516	0.000189086	0.000177907	0.000124318	2.62231e-10	2.13937e-07	1.30014	thiS; sulfur carrier protein
K07154	0.000639754	0.000528938	0.000523365	0.000498326	0.000609884	0.000538952	0.00054713	0.000603786	0.000569181	0.000309055	0.000305669	0.00034035	0.000317656	0.000346088	0.000358446	0.000271023	0.000322156	0.000307836	3.42153e-10	2.39263e-07	1.50697	hipA; serine/threonine-protein kinase HipA
K05601	0.000203333	0.000132234	0.000191142	0.000191664	0.000195709	0.000192483	0.000206842	0.000206701	0.000189727	3.75e-05	4.93e-05	4.54e-05	7.47e-05	9.11e-05	4.89e-05	7.56e-05	4.33e-05	7.1e-05	4.51552e-10	2.76293e-07	0.955371	hcp; hydroxylamine reductase
K19545	4.96e-05	3.64e-05	5.46e-05	3.83e-05	5.01e-05	5.56e-05	4e-05	5.44e-05	3.28e-05	0	0	0	0	1.21e-05	0	1.26e-05	0	0	1.2639e-09	6.8742e-07	0.700591	lnuA_C_D_E, lin; lincosamide nucleotidyltransferase A/C/D/E
K03198	4.96e-06	3.31e-06	4.55e-06	4.26e-06	4.55e-06	4.28e-06	6.67e-06	5.44e-06	7.3e-06	0	0	0	0	0	0	0	0	0	1.95553e-09	9.57234e-07	0.658708	virB3, lvhB3; type IV secretion system protein VirB3
K03564	0.000307479	0.000274387	0.000323121	0.000344995	0.000304942	0.00029514	0.00030359	0.000299173	0.000317428	8.43e-05	7.4e-05	0.000107778	0.000177514	0.000145721	0.00018737	0.000170177	0.000115399	9.47e-05	4.06446e-09	1.80869e-06	1.09842	BCP, PRXQ, DOT5; peroxiredoxin Q/BCP
K01963	0.000312438	0.000333892	0.000327672	0.000349254	0.000350456	0.000355024	0.00030359	0.000342689	0.000277293	0.000177941	0.000202136	0.000209883	0.000200871	0.000230725	0.000228102	0.0002206	0.000182715	0.000171678	6.08555e-09	2.48132e-06	1.64674	accD; acetyl-CoA carboxylase carboxyl transferase subunit beta
K00265	0.000104146	7.27e-05	8.65e-05	8.94e-05	7.74e-05	8.13e-05	0.000106757	8.7e-05	8.76e-05	2.81e-05	2.47e-05	2.84e-05	3.74e-05	4.86e-05	3.26e-05	4.41e-05	1.92e-05	1.78e-05	6.58982e-09	2.48132e-06	0.989505	gltB; glutamate synthase (NADPH/NADH) large chain
K09702	0.000128943	0.000148764	0.000122877	0.000132035	0.000141093	0.000106935	0.000153463	0.000125109	0.000160538	3.28e-05	2.47e-05	2.84e-05	7.94e-05	4.25e-05	6.11e-05	5.67e-05	4.33e-05	1.78e-05	1.11242e-08	3.40956e-06	0.932492	K09702; uncharacterized protein
K20765	0	0	9.1e-06	0	0	8.55e-06	6.67e-06	5.44e-06	3.65e-06	4.68e-05	3.94e-05	2.84e-05	3.74e-05	3.04e-05	3.67e-05	3.15e-05	2.88e-05	5.33e-05	1.13622e-08	3.40956e-06	-0.0249627	camK; 6-oxocamphor hydrolase
K00615	0.00204324	0.00208931	0.00201154	0.00207423	0.00194799	0.00208737	0.00206175	0.00191471	0.00203227	0.00251459	0.00244042	0.00247888	0.00233571	0.00242869	0.00226473	0.00245181	0.00233683	0.00254557	1.14955e-08	3.40956e-06	-3.0948	E2.2.1.1, tktA, tktB; transketolase
K16789	0.000471137	0.000545467	0.000468753	0.000519622	0.000459689	0.000496178	0.000570483	0.000511314	0.000525398	0.00082883	0.000759242	0.000765788	0.000710055	0.000716463	0.00066394	0.000680709	0.000769327	0.000704471	1.18412e-08	3.40956e-06	-1.32234	thiT; thiamine transporter
K09951	0.000753819	0.00072729	0.000664446	0.000779433	0.000814695	0.000769932	0.000727282	0.000815927	0.000766205	0.00100677	0.00109449	0.00123661	0.000966982	0.00112327	0.00103461	0.00112191	0.00107225	0.00117215	1.47492e-08	4.01096e-06	-1.32552	cas2; CRISPR-associated protein Cas2
K09861	0.000114065	0.000119011	0.000159285	0.000166109	0.000127438	0.000149709	0.000156799	0.000130548	0.000142295	1.87e-05	1.48e-05	1.13e-05	7.47e-05	3.04e-05	7.74e-05	1.89e-05	2.88e-05	1.78e-05	1.88019e-08	4.84396e-06	0.828774	K09861; uncharacterized protein
K06919	0.000421543	0.000396703	0.000418692	0.000468512	0.000405072	0.000363579	0.00039033	0.000407963	0.000368508	0.000304373	0.000271158	0.000238245	0.000233571	0.000267156	0.000244395	0.000302538	0.000259648	0.000278237	2.05533e-08	5.03043e-06	1.80829	K06919; putative DNA primase/helicase
K19956	7.44e-05	8.6e-05	8.65e-05	8.94e-05	8.19e-05	7.27e-05	8.34e-05	7.62e-05	9.12e-05	0.000163893	0.000152834	0.000153158	0.000116785	0.000151793	0.000134417	0.000119754	0.000134632	0.000142078	2.25212e-08	5.07785e-06	-0.796578	sorE; L-sorbose 1-phosphate reductase
K01937	0.000525689	0.000492573	0.000573426	0.000549437	0.000587127	0.00052612	0.000543794	0.000478677	0.000514452	0.000262229	0.00034018	0.000351695	0.000369042	0.000382518	0.000317714	0.000403383	0.000312539	0.000367035	2.28218e-08	5.07785e-06	1.75204	pyrG, CTPS; CTP synthase
K03671	0.0018052	0.00181161	0.00189321	0.00186127	0.00169766	0.00180078	0.00178818	0.00178416	0.00175133	0.00144226	0.00152834	0.00133304	0.00156492	0.00153615	0.00147859	0.0015379	0.00141845	0.00152142	2.46996e-08	5.25672e-06	3.47066	trxA; thioredoxin 1
K01962	0.000357072	0.000317363	0.000327672	0.000374809	0.000400521	0.000346469	0.000320271	0.000359008	0.000306482	0.000182624	0.000182415	0.000198538	0.000200871	0.000261084	0.000244395	0.000214297	0.000211565	0.000195358	2.78585e-08	5.54181e-06	1.57239	accA; acetyl-CoA carboxylase carboxyl transferase subunit alpha
K05919	0.000401706	0.000462821	0.000486957	0.00042592	0.000350456	0.00042774	0.000490415	0.000369887	0.000463372	0.000285642	0.000221856	0.00024959	0.000233571	0.00024894	0.000195516	0.000271023	0.000230798	0.000254557	2.95777e-08	5.54181e-06	1.41964	dfx; superoxide reductase
K07000	3.97e-05	3.97e-05	4.55e-05	5.54e-05	5.92e-05	6.84e-05	5.34e-05	7.07e-05	5.11e-05	9.37e-06	0	1.13e-05	1.4e-05	1.21e-05	1.63e-05	1.26e-05	1.92e-05	0	2.97571e-08	5.54181e-06	0.790653	K07000; uncharacterized protein
K03147	0.000198373	0.000241328	0.000250305	0.000225737	0.000282185	0.000256644	0.000226859	0.000271976	0.000215267	6.56e-05	7.89e-05	0.000119123	0.000107442	0.000127506	0.00015071	0.000144966	0.000110591	9.47e-05	3.05677e-08	5.54181e-06	1.15448	thiC; phosphomethylpyrimidine synthase
K03385	3.47e-05	3.64e-05	4.55e-05	2.98e-05	2.73e-05	2.14e-05	4.34e-05	4.35e-05	3.28e-05	9.37e-06	4.93e-06	5.67e-06	9.34e-06	6.07e-06	8.15e-06	6.3e-06	9.62e-06	0	3.72153e-08	6.50603e-06	0.781776	nrfA; nitrite reductase (cytochrome c-552)
K01480	0.000183495	0.00019174	0.000159285	0.000144813	0.000168401	0.000158264	0.000170144	0.000157746	0.000153241	7.02e-05	7.89e-05	7.94e-05	8.88e-05	0.000109291	9.37e-05	0.000119754	5.77e-05	8.88e-05	4.30284e-08	7.26289e-06	1.30733	speB; agmatinase
K00632	0	0	0	0	0	0	0	0	0	3.75e-05	2.47e-05	3.4e-05	2.34e-05	3.04e-05	2.04e-05	5.04e-05	2.4e-05	4.14e-05	4.79691e-08	7.50548e-06	0.0512212	fadA, fadI; acetyl-CoA acyltransferase
K02431	0.000208292	0.000267775	0.000236652	0.000251293	0.00020026	0.000239534	0.000246876	0.000250218	0.000237159	0.000309055	0.00035497	0.000334678	0.00033167	0.000340016	0.000321787	0.000340355	0.000360622	0.000295996	4.97722e-08	7.50548e-06	-1.4313	fucU, FUOM; L-fucose mutarotase
K19883	9.92e-06	1.98e-05	1.37e-05	2.56e-05	1.82e-05	1.71e-05	1e-05	2.18e-05	1.46e-05	0	0	0	0	0	0	0	0	0	5.20638e-08	7.50548e-06	0.641404	aacA-aphD; bifunctional aminoglycoside 6'-N-acetyltransferase / aminoglycoside 2''-phosphotransferase
K01420	0.000178536	0.000204963	0.000259407	0.000217219	0.000168401	0.000192483	0.000180153	0.000195822	0.000200673	6.56e-05	7.4e-05	2.84e-05	0.000107442	6.07e-05	0.000114051	6.3e-05	0.000100974	4.14e-05	5.22888e-08	7.50548e-06	0.979813	fnr; CRP/FNR family transcriptional regulator, anaerobic regulatory protein
K03826	0.000138861	9.59e-05	0.000100122	0.00015759	0.000113784	0.000141154	0.000133446	0.00011423	0.000124052	1.4e-05	3.45e-05	5.11e-05	6.07e-05	4.25e-05	5.7e-05	5.67e-05	2.88e-05	2.37e-05	5.3306e-08	7.50548e-06	0.931163	yiaC; putative acetyltransferase
K10206	0.000585201	0.000499185	0.000596181	0.000574992	0.000637192	0.000577449	0.000587164	0.000652742	0.000576478	0.00038866	0.000409202	0.000374385	0.000359699	0.000461451	0.000407325	0.000441201	0.000355814	0.000319676	5.36653e-08	7.50548e-06	1.81278	E2.6.1.83; LL-diaminopimelate aminotransferase
K03205	0.00108113	0.00115705	0.00113775	0.00122665	0.00125163	0.00125328	0.00110093	0.00110966	0.00121133	0.00082883	0.000946587	0.000901928	0.000803483	0.000837897	0.000753552	0.000838281	0.000774135	0.000976788	6.10129e-08	8.29606e-06	2.21013	virD4, lvhD4; type IV secretion system protein VirD4
K22130	3.47e-05	2.31e-05	3.64e-05	2.56e-05	2.73e-05	3.42e-05	3.34e-05	3.26e-05	2.92e-05	0	9.86e-06	0	1.4e-05	6.07e-06	1.63e-05	6.3e-06	9.62e-06	0	7.02678e-08	9.29624e-06	0.809282	otnC; 3-dehydro-4-phosphotetronate decarboxylase
K09457	0.000213251	0.000214881	0.000213897	0.00026407	0.000273082	0.000243812	0.000203506	0.000277415	0.000204321	9.83e-05	0.000128184	0.000107778	0.000121457	0.000133578	0.000142564	0.000151269	0.000134632	0.000106559	7.5218e-08	9.61394e-06	1.30729	queF; 7-cyano-7-deazaguanine reductase
K07114	0.000624876	0.000485962	0.000573426	0.000545177	0.000600781	0.000586003	0.000607181	0.000592907	0.000569181	0.000280959	0.0003599	0.000357368	0.000406413	0.000461451	0.000366593	0.000415989	0.000331772	0.000337436	7.65972e-08	9.61394e-06	1.67742	yfbK; Ca-activated chloride channel homolog
K03320	0.000252926	0.000208269	0.000295815	0.000315181	0.000391418	0.000269476	0.000306927	0.000326371	0.000291888	5.15e-05	6.41e-05	9.08e-05	0.000126128	0.00013965	0.000158857	0.000119754	6.25e-05	8.29e-05	8.1354e-08	9.9557e-06	0.935375	amt, AMT, MEP; ammonium transporter, Amt family

## Sheet: C-functional-gene-differs
Group	k number	pFDR	Definition	ortholog group(KOs)	level-1 Pathway
CRr	K07154	2.39263e-07	serine/threonine-protein kinase HipA	ko02048 Prokaryotic defense system	09183 Protein families: signaling and cellular processes
WRr	K09951	4.01096e-06	CRISPR-associated protein Cas2
CRr	K03320	9.9557e-06	ammonium transporter, Amt family	ko02000 Transporters
	K07114	9.61394e-06	Ca-activated chloride channel homolog
WRr	K16789	3.40956e-06	thiamine transporter
CRr	K19883	7.50548e-06	bifunctional aminoglycoside 6'-N-acetyltransferase / aminoglycoside 2''-phosphotransferase [EC:2.3.1.82 2.7.1.190]	ko01504 Antimicrobial resistance genes
	K19545	6.8742e-07	lincosamide nucleotidyltransferase A/C/D/E
	K18234	3.00522e-08	virginiamycin A acetyltransferase
CRr	K01420	7.50548e-06	CRP/FNR family transcriptional regulator, anaerobic regulatory protein	ko03000 Transcription factors
CRr	K01963	2.48132e-06	acetyl-CoA carboxylase carboxyl transferase subunit beta	ko00620 Pyruvate metabolism	09101 Carbohydrate metabolism
	K01962	5.54181e-06	acetyl-CoA carboxylase carboxyl transferase subunit alpha
WRr	K00615	3.40956e-06	transketolase	ko00030 Pentose phosphate pathway
	K19956	5.07785e-06	L-sorbose 1-phosphate reductase	ko00051 Fructose and mannose
WRr	K00632	7.50548e-06	acetyl-CoA acyltransferase	ko00280 Valine, leucine and isoleucine degradation	9105 Amino acid metabolism
CRr	K10206	7.50548e-06	LL-diaminopimelate aminotransferase	ko00300 Lysine biosynthesis
	K01480	7.26289e-06	agmatinase	ko00330 Arginine and proline metabolism
CRr	K05601	2.76293e-07	hydroxylamine reductase	ko00910 Nitrogen metabolism /Glutamate metabolism	9102 Energy metabolism
	K00265	2.48132e-06	glutamate synthase (NADPH) large chain
	K03385	6.50603e-06	nitrite reductase (cytochrome c-552)
CRr	K03147	5.54181e-06	phosphomethylpyrimidine synthase	ko00730 Thiamine metabolism	09108 Metabolism of cofactors and vitamins
	K09457	9.61394e-06	7-cyano-7-deazaguanine reductase	ko00790 Folate biosynthesis
CRr	K03198	9.57234e-07	type IV secretion system protein VirB3	ko03070 Bacterial secretion system	09131 Membrane transport
	K03205	8.29606e-06	type IV secretion system protein VirD4
CRr	K05286	2.13937e-07	GPI mannosyltransferase 3	ko00563 Glycosylphosphatidylinositol (GPI)-anchor biosynthesis	09107 Glycan biosynthesis and metabolism
WRr	K07590	3.00522e-08	large subunit ribosomal protein L7A	ko03010 Ribosome	09122 Translation
CRr	K03154	2.13937e-07	sulfur carrier protein	ko04122 Sulfur relay system	09123 Folding, sorting and degradation
CRr	K03671	5.25672e-06	thioredoxin 1	ko05132 Salmonella infection	09171 Infectious disease: bacterial
